# Supplementary material for: Association between characteristics of behavioural weight loss programmes and weight change after programme end: systematic review and meta-analysis
Source: PubMed Central journal article supplement — BMJ. 2021 Aug 17;374:n1840. doi: 10.1136/bmj.n1840 (PMC8369384; doi:10.1136/bmj.n1840), 2021-08-17
Supplement: harj064686.ww.pdf [file harj064686.ww.pdf]

## Supplementary material

### Contents

|                                                                                                                                                                                        |     |
|----------------------------------------------------------------------------------------------------------------------------------------------------------------------------------------|-----|
| SUPPLEMENTAL TABLES .....                                                                                                                                                              | 2   |
| Table 1. Included studies reference list.....                                                                                                                                          | 2   |
| Table 2. Risk of bias of included studies .....                                                                                                                                        | 15  |
| Table 3. Characteristics of included studies .....                                                                                                                                     | 114 |
| Table 4. Baseline demographics .....                                                                                                                                                   | 139 |
| Table 5. Intervention characteristics .....                                                                                                                                            | 157 |
| Table 6. Results from sensitivity analyses; univariate.....                                                                                                                            | 246 |
| Table 7. Results from sensitivity analysis; model a.....                                                                                                                               | 246 |
| Table 8. Results from sensitivity analysis; model b .....                                                                                                                              | 247 |
| Table 9. Results from sensitivity analysis; model c.....                                                                                                                               | 247 |
| SUPPLEMENTAL FIGURES .....                                                                                                                                                             | 248 |
| Supplemental Figure 1. PRISMA diagram of study flow.....                                                                                                                               | 248 |
| Supplemental Figure 2. Weight change trajectory after programme end in studies where programme was available outside the study, with most influential study removed (Perri 1984) ..... | 249 |

## SUPPLEMENTAL TABLES

**Table 1. Included studies reference list**

| Study ID               | Primary reference                                                                                                                                                                                                                                                              |
|------------------------|--------------------------------------------------------------------------------------------------------------------------------------------------------------------------------------------------------------------------------------------------------------------------------|
| Abed 2013              | Abed HS, Wittert GA, Leong DP, et al. Effect of weight reduction and cardiometabolic risk factor management on symptom burden and severity in patients with atrial fibrillation: a randomized clinical trial. <i>JAMA</i> 2013; <b>310</b> (19): 2050-60.                      |
| Ackermann 2011         | Ackermann RT, Finch EA, Caffrey HM, Lipscomb ER, Hays LM, Saha C. Long-term effects of a community-based lifestyle intervention to prevent type 2 diabetes: the DEPLOY extension pilot study. <i>Chronic Illn</i> 2011; <b>7</b> (4): 279-90.                                  |
| Agras 1990             | Agras WS, Taylor CB, Feldman DE, Losch M, Burnett KF. Developing computer-assisted therapy for the treatment of obesity. <i>Behavior Therapy</i> 1990; <b>21</b> (1): 99-109                                                                                                   |
| Ahern 2017             | Ahern AL, Wheeler GM, Aveyard P, et al. Extended and standard duration weight-loss programme referrals for adults in primary care (WRAP): a randomised controlled trial. <i>Lancet</i> 2017; <b>389</b> (10085): 2214-25                                                       |
| Almanza -Aguilera 2018 | Almanza-Aguilera E, Brunius C, Bernal-Lopez MR, et al. Impact in Plasma Metabolome as Effect of Lifestyle Intervention for Weight-Loss Reveals Metabolic Benefits in Metabolically Healthy Obese Women. <i>J Proteome Res</i> 2018; <b>17</b> (8): 2600-10.                    |
| Ames 2005              | Ames GE, Perri MG, Fox LD, et al. Changing weight-loss expectations: a randomized pilot study. <i>Eat behav</i> 2005; <b>6</b> (3): 259-69.                                                                                                                                    |
| Andersen 1999          | Andersen RE, Wadden TA, Bartlett SJ, Zemel B, Verde TJ, Franckowiak SC. Effects of lifestyle activity vs structured aerobic exercise in obese women: a randomized trial. <i>JAMA</i> 1999; <b>281</b> (4): 335-40.                                                             |
| Anderson 2014          | Anderson AS, Craigie AM, Caswell S, et al. The impact of a bodyweight and physical activity intervention (BeWEL) initiated through a national colorectal cancer screening programme: randomised controlled trial. <i>BMJ</i> 2014; <b>348</b> : g1823.                         |
| Annesi 2016            | Annesi JJ, Johnson PH, Tennant GA, Porter KJ, McEwen KL. Weight Loss and the Prevention of Weight Regain: Evaluation of a Treatment Model of Exercise Self-Regulation Generalizing to Controlled Eating. <i>Perm J</i> 2016; <b>20</b> (3): 15-146.                            |
| Annesi 2017            | Annesi JJ. Mediation of the relationship of behavioural treatment type and changes in psychological predictors of healthy eating by body satisfaction changes in women with obesity. <i>Obes Res Clin Pract</i> 2017; <b>11</b> (1): 97-107.                                   |
| Appel 2011             | Appel LJ, Clark JM, Yeh HC, et al. Comparative effectiveness of weight-loss interventions in clinical practice. <i>N Engl J Med</i> 2011; <b>365</b> (21): 1959-68.                                                                                                            |
| Ard 2004               | Ard JD, Grambow SC, Liu D, Slentz CA, Kraus WE, Svetkey LP. The effect of the PREMIER interventions on insulin sensitivity. <i>Diabetes Care</i> 2004; <b>27</b> (2): 340-7.                                                                                                   |
| Ard 2018               | Ard JD, Gower B, Hunter G, et al. Effects of Calorie Restriction in Obese Older Adults: The CROSSROADS Randomized Controlled Trial. <i>J Gerontol A Biol Sci Med Sci</i> 2017; <b>73</b> (1): 73-80                                                                            |
| Ash 2006               | Ash S, Reeves M, Bauer J, et al. A randomised control trial comparing lifestyle groups, individual counselling and written information in the management of weight and health outcomes over 12 months. <i>Int J Obes (Lond)</i> 2006; <b>30</b> (10): 1557-64.                 |
| Ashley 2001            | Ashley JM, St Jeor ST, Perumean-Chaney S, Schrage J, Bovee V. Meal replacements in weight intervention. <i>Obes Res</i> 2001; <b>9 Suppl 4</b> : 312s-20s.                                                                                                                     |
| Ashley 2007            | Ashley JM, Herzog H, Clodfelter S, Bovee V, Schrage J, Pritsos C. Nutrient adequacy during weight loss interventions: a randomized study in women comparing the dietary intake in a meal replacement group with a traditional food group. <i>Nutr J</i> . 2007; <b>6</b> : 12. |
| Aveyard 2016           | Aveyard P, Lewis A, Teame S, et al. Screening and brief intervention for obesity in primary care: a parallel, two-arm, randomised trial. <i>Lancet</i> 2016; <b>388</b> (10059): 2492-500.                                                                                     |

| Study ID       | Primary reference                                                                                                                                                                                                                                                                                          |
|----------------|------------------------------------------------------------------------------------------------------------------------------------------------------------------------------------------------------------------------------------------------------------------------------------------------------------|
| Azar 2013      | Azar KM, Xiao L, Ma J. Baseline obesity status modifies effectiveness of adapted diabetes prevention program lifestyle interventions for weight management in primary care. <i>Biomed Res Int</i> 2013; <b>2013</b> : 191209.                                                                              |
| Bacon 2002     | Bacon L, Keim NL, Van Loan MD, et al. Evaluating a 'non-diet' wellness intervention for improvement of metabolic fitness, psychological well-being and eating and activity behaviors. <i>Int J Obes Relat Metab Disord</i> 2002; <b>26</b> (6): 854-65.                                                    |
| Barnes 2017    | arnes RD, Ivezaj V, Martino S, Pittman BP, Grilo CM. Back to Basics? No Weight Loss from Motivational Interviewing Compared to Nutrition Psychoeducation at One-Year Follow-Up. <i>Obesity (Silver Spring)</i> 2017; <b>25</b> (12): 2074-8.                                                               |
| Bartels 2015   | Bartels SJ, Pratt SI, Aschbrenner KA, et al. Pragmatic replication trial of health promotion coaching for obesity in serious mental illness and maintenance of outcomes. <i>Am J Psychiatry</i> 2015; <b>172</b> (4): 344-52.                                                                              |
| Beavers 2017   | Beavers KM, Ambrosius WT, Rejeski WJ, et al. Effect of Exercise Type During Intentional Weight Loss on Body Composition in Older Adults with Obesity. <i>Obesity (Silver Spring)</i> 2017; <b>25</b> (11): 1823-9.                                                                                         |
| Beeken 2017    | Beeken RJ, Leurent B, Vickerstaff V, et al. A brief intervention for weight control based on habit-formation theory delivered through primary care: results from a randomised controlled trial. <i>Int J Obes (Lond)</i> 2017; <b>41</b> (2): 246-54.                                                      |
| Bennett 1986   | Bennett GA. An evaluation of self-instructional training in the treatment of obesity. <i>Addict Behav</i> 1986; <b>11</b> (2): 125-34.                                                                                                                                                                     |
| Bennett 2012   | Bennett GG, Warner ET, Glasgow RE, et al. Obesity treatment for socioeconomically disadvantaged patients in primary care practice. <i>Arch Intern Med</i> 2012; <b>172</b> (7): 565-74.                                                                                                                    |
| Bennett 2013   | Bennett GG, Foley P, Levine E, et al. Behavioral treatment for weight gain prevention among black women in primary care practice: a randomized clinical trial. <i>JAMA Intern Med</i> 2013; <b>173</b> (19): 1770-7.                                                                                       |
| Berendsen 2011 | Berendsen BA, Hendriks MR, Verhagen EA, Schaper NC, Kremers SP, Savelberg HH. Effectiveness and cost-effectiveness of 'BeweeegKuur', a combined lifestyle intervention in the Netherlands: rationale, design and methods of a randomized controlled trial. <i>BMC Public Health</i> 2011; <b>11</b> : 815. |
| Berry 2014     | Berry DC, Schwartz TA, McMurray RG, et al. The family partners for health study: a cluster randomized controlled trial for child and parent weight management. <i>Nutr Diabetes</i> 2014; <b>4</b> (1): e101.                                                                                              |
| Bertram 1990   | Bertram SR, Venter I, Stewart RI. Weight loss in obese women--exercise v. dietary education. <i>S Afr Med J</i> 1990; <b>78</b> (1): 15-8.                                                                                                                                                                 |
| Bertz 2012     | Bertz F, Brekke HK, Ellegård L, Rasmussen KM, Wennergren M, Winkvist A. Diet and exercise weight-loss trial in lactating overweight and obese women. <i>Am J Clin Nutr</i> 2012; <b>96</b> (4): 698-705.                                                                                                   |
| Beutel 2006    | Beutel ME, Dippel A, Szczepanski M, Thiede R, Wiltink J. Mid-term effectiveness of behavioral and psychodynamic inpatient treatments of severe obesity based on a randomized study. <i>Psychother Psychosom</i> 2006; <b>75</b> (6): 337-45.                                                               |
| Bliddal 2011   | Bliddal H, Leeds AR, Stigsgaard L, Astrup A, Christensen R. Weight loss as treatment for knee osteoarthritis symptoms in obese patients: 1-year results from a randomised controlled trial. <i>Ann Rheum Dis</i> 2011; <b>70</b> (10): 1798-803.                                                           |
| Bo 2007        | Bo S, Ciccone G, Baldi C, et al. Effectiveness of a lifestyle intervention on metabolic syndrome. A randomized controlled trial. <i>J Gen Intern Med</i> 2007; <b>22</b> (12): 1695-703.                                                                                                                   |
| Brown 2014     | Brown C, Goetz J, Hamera E, Gajewski B. Treatment response to the RENEW weight loss intervention in schizophrenia: impact of intervention setting. <i>Schizophr Res</i> 2014; <b>159</b> (2-3): 421-5.                                                                                                     |
| Burke 2005     | Burke V, Beilin LJ, Cutt HE, Mansour J, Wilson A, Mori TA. Effects of a lifestyle programme on ambulatory blood pressure and drug dosage in treated hypertensive patients: a randomized controlled trial. <i>J Hypertens</i> 2005; <b>23</b> (6): 1241-9.                                                  |
| Burke 2015     | Burke LE, Ewing LJ, Ye L, et al. The SELF trial: A self-efficacy-based behavioral intervention trial for weight loss maintenance. <i>Obesity (Silver Spring)</i> 2015; <b>23</b> (11): 2175-82.                                                                                                            |
| Cesa 2013      | Cesa GL, Manzoni GM, Bacchetta M, et al. Virtual reality for enhancing the cognitive behavioral treatment of obesity with binge eating disorder: randomized controlled study with one-year follow-up. <i>J Med Internet Res</i> 2013; <b>15</b> (6): e113.                                                 |

| Study ID         | Primary reference                                                                                                                                                                                                                                                                                   |
|------------------|-----------------------------------------------------------------------------------------------------------------------------------------------------------------------------------------------------------------------------------------------------------------------------------------------------|
| Chaiyasoot 2018  | Chaiyasoot K, Sarasak R, Pheungruang B, et al. Evaluation of a 12-week lifestyle education intervention with or without partial meal replacement in Thai adults with obesity and metabolic syndrome: a randomised trial. <i>Nutr Diabetes</i> 2018; <b>8</b> (1): 23.                               |
| Chee 2017        | Chee WSS, Gilcharan Singh HK, Hamdy O, et al. Structured lifestyle intervention based on a trans-cultural diabetes-specific nutrition algorithm (tDNA) in individuals with type 2 diabetes: a randomized controlled trial. <i>BMJ Open Diabetes Res Care</i> 2017; <b>5</b> (1): e000384.           |
| Cheskin 2008     | Cheskin LJ, Mitchell AM, Jhaveri AD, et al. Efficacy of meal replacements versus a standard food-based diet for weight loss in type 2 diabetes: a controlled clinical trial. <i>Diabetes Educ</i> 2008; <b>34</b> (1): 118-27.                                                                      |
| Cheyette 2007    | Cheyette C. Weight No More: a randomised controlled trial for people with type 2 diabetes on insulin therapy. <i>Pract Diab Int</i> 2007; <b>24</b> (9): 450-6.                                                                                                                                     |
| Christensen 2012 | Christensen JR, Overgaard K, Carneiro IG, Holtermann A, Søgaard K. Weight loss among female health care workers--a 1-year workplace based randomized controlled trial in the FINALE-health study. <i>BMC Public Health</i> 2012; <b>12</b> : 625.                                                   |
| Cleo 2018        | Cleo G, Glasziou P, Beller E, Isenring E, Thomas R. Habit-based interventions for weight loss maintenance in adults with overweight and obesity: a randomized controlled trial. <i>Int J Obes (Lond)</i> 2019; <b>43</b> (2): 374-83.                                                               |
| Cole 2013        | Cole RE, Boyer KM, Spanbauer SM, Sprague D, Bingham M. Effectiveness of prediabetes nutrition shared medical appointments: prevention of diabetes. <i>Diabetes Educ</i> 2013; <b>39</b> (3): 344-53.                                                                                                |
| Conroy 2015      | Conroy MB, Sward KL, Spadaro KC, et al. Effectiveness of a physical activity and weight loss intervention for middle-aged women: healthy bodies, healthy hearts randomized trial. <i>J Gen Intern Med</i> 2015; <b>30</b> (2): 207-13.                                                              |
| Cooper 2010      | Cooper Z, Doll HA, Hawker DM, et al. Testing a new cognitive behavioural treatment for obesity: A randomized controlled trial with three-year follow-up. <i>Behav Res Ther</i> 2010; <b>48</b> (8): 706-13.                                                                                         |
| Cousins 1992     | Cousins JH, Rubovits DS, Dunn JK, Reeves RS, Ramirez AG, Foreyt JP. Family versus individually oriented intervention for weight loss in Mexican American women. <i>Public Health Rep</i> 1992; <b>107</b> (5): 549-55.                                                                              |
| Craighead 1989   | Craighead LW, Blum MD. Supervised exercise in behavioral treatment for moderate obesity. <i>Behavior Therapy</i> 1989; <b>20</b> (1): 49-59.                                                                                                                                                        |
| Crowley 2017     | Crowley MJ, Edelman D, Voils CI, et al. Jump starting shared medical appointments for diabetes with weight management: Rationale and design of a randomized controlled trial. <i>Contemp Clin Trials</i> 2017; <b>58</b> : 1-12.                                                                    |
| Dale 2009        | Dale KS, Mann JI, McAuley KA, Williams SM, Farmer VL. Sustainability of lifestyle changes following an intensive lifestyle intervention in insulin resistant adults: Follow-up at 2-years. <i>Asia Pac J Clin Nutr</i> 2009; <b>18</b> (1): 114-20.                                                 |
| Dalziel 2006     | Dalziel K, Segal L, de Lorge M. A mediterranean diet is cost-effective in patients with previous myocardial infarction. <i>J Nutr</i> 2006; <b>136</b> (7): 1879-85.                                                                                                                                |
| Damschroder 2014 | Damschroder LJ, Lutes LD, Kirsh S, et al. Small-changes obesity treatment among veterans: 12-month outcomes. <i>Am J Prev Med</i> 2014; <b>47</b> (5): 541-53.                                                                                                                                      |
| Daubenmier 2016  | Daubenmier J, Moran PJ, Kristeller J, et al. Effects of a mindfulness-based weight loss intervention in adults with obesity: A randomized clinical trial. <i>Obesity (Silver Spring)</i> 2016; <b>24</b> (4): 794-804.                                                                              |
| Daumit 2013      | Daumit GL, Dickerson FB, Wang NY, et al. A behavioral weight-loss intervention in persons with serious mental illness. <i>N Engl J Med</i> 2013; <b>368</b> (17): 1594-602.                                                                                                                         |
| de Zwaan 2017    | de Zwaan M, Herpertz S, Zipfel S, et al. Effect of Internet-Based Guided Self-help vs Individual Face-to-Face Treatment on Full or Subsyndromal Binge Eating Disorder in Overweight or Obese Patients: The INTERBED Randomized Clinical Trial. <i>JAMA psychiatry</i> 2017; <b>74</b> (10): 987-95. |
| Delahanty 2015   | Delahanty LM, Dalton KM, Porneala B, et al. Improving diabetes outcomes through lifestyle change--A randomized controlled trial. <i>Obesity (Silver Spring)</i> 2015; <b>23</b> (9): 1792-9.                                                                                                        |

| Study ID                             | Primary reference                                                                                                                                                                                                                                                                                   |
|--------------------------------------|-----------------------------------------------------------------------------------------------------------------------------------------------------------------------------------------------------------------------------------------------------------------------------------------------------|
| deRoon 2017                          | de Roon M, van Gemert WA, Peeters PH, Schuit AJ, Monninkhof EM. Long-term effects of a weight loss intervention with or without exercise component in postmenopausal women: A randomized trial. <i>Prev Med Rep</i> 2017; <b>5</b> : 118-23.                                                        |
| deVos 2016                           | de Vos BC, Runhaar J, van Middelkoop M, Krul M, Bierma-Zeinstra SM. Long-term effects of a randomized, controlled, tailor-made weight-loss intervention in primary care on the health and lifestyle of overweight and obese women. <i>Am J Clin Nutr</i> 2016; <b>104</b> (1): 33-40.               |
| DeZwaan 2005                         | de Zwaan M, Mitchell JE, Crosby RD, et al. Short-term cognitive behavioral treatment does not improve outcome of a comprehensive very-low-calorie diet program in obese women with binge eating disorder. <i>Behavior Therapy</i> 2005; <b>36</b> (1): 89-99.                                       |
| Diabetes Prevention Program R G 2009 | Knowler WC, Fowler SE, Hamman RF, et al. 10-year follow-up of diabetes incidence and weight loss in the Diabetes Prevention Program Outcomes Study. <i>Lancet</i> 2009; <b>374</b> (9702): 1677-86.                                                                                                 |
| Djuric 2002                          | Djuric Z, DiLaura NM, Jenkins I, et al. Combining weight-loss counseling with the weight watchers plan for obese breast cancer survivors. <i>Obes Res</i> 2002; <b>10</b> (7): 657-65.                                                                                                              |
| Donnelly 2013                        | Donnelly JE, Saunders RR, Saunders M, et al. Weight management for individuals with intellectual and developmental disabilities: rationale and design for an 18 month randomized trial. <i>Contemp Clin Trials</i> 2013; <b>36</b> (1): 116-24.                                                     |
| Duncan 2016                          | Duncan S, Goodyear-Smith F, McPhee J, Zinn C, Grøntved A, Schofield G. Family-centered brief intervention for reducing obesity and cardiovascular disease risk: A randomized controlled trial. <i>Obesity (Silver Spring)</i> 2016; <b>24</b> (11): 2311-8.                                         |
| Eakin 2014                           | Eakin EG, Winkler EA, Dunstan DW, et al. Living well with diabetes: 24-month outcomes from a randomized trial of telephone-delivered weight loss and physical activity intervention to improve glycemic control. <i>Diabetes care</i> 2014; <b>37</b> (8): 2177-85.                                 |
| Eaton 2016                           | Eaton CB, Hartman SJ, Perzanowski E, et al. A Randomized Clinical Trial of a Tailored Lifestyle Intervention for Obese, Sedentary, Primary Care Patients. <i>Ann Fam Med</i> 2016; <b>14</b> (4): 311-9.                                                                                            |
| Fahey 2018                           | Fahey MC, Hare ME, Talcott GW, et al. Characteristics Associated With Participation in a Behavioral Weight Loss Randomized Control Trial in the U.S. Military. <i>Mil Med</i> 2019; <b>184</b> (3-4): e120-e6.                                                                                      |
| Fernandez-Ruiz 2018                  | Fernández-Ruiz VE, Armero-Barranco D, Paniagua-Urbano JA, Sole-Agusti M, Ruiz-Sánchez A, Gómez-Marín J. Short-medium-long-term efficacy of interdisciplinary intervention against overweight and obesity: Randomized controlled clinical trial. <i>Int J Nurs Prac</i> 2018; <b>24</b> (6): e12690. |
| Finkelstein 2017                     | Finkelstein EA, Tham KW, Haaland BA, Sahasranaman A. Applying economic incentives to increase effectiveness of an outpatient weight loss program (TRIO) - A randomized controlled trial. <i>Soc Sci Med (1982)</i> 2017; <b>185</b> : 63-70.                                                        |
| Fisher 2011                          | Fisher G, Hyatt TC, Hunter GR, Oster RA, Desmond RA, Gower BA. Effect of diet with and without exercise training on markers of inflammation and fat distribution in overweight women. <i>Obesity (Silver Spring)</i> 2011; <b>19</b> (6): 1131-6.                                                   |
| Foley 2016                           | Foley P, Steinberg D, Levine E, et al. Track: A randomized controlled trial of a digital health obesity treatment intervention for medically vulnerable primary care patients. <i>Contemp Clin Trials</i> 2016; <b>48</b> : 12-20.                                                                  |
| Foreyt 1993                          | Foreyt JP, Goodrick GK, Reeves RS, et al. Response of free-living adults to behavioral treatment of obesity: Attrition and compliance to exercise. <i>Behavior Therapy</i> 1993; <b>24</b> (4): 659-69.                                                                                             |
| Forman 2013                          | Forman EM, Butryn ML, Juarascio AS, et al. The mind your health project: a randomized controlled trial of an innovative behavioral treatment for obesity. <i>Obesity (Silver Spring)</i> 2013; <b>21</b> (6): 1119-26.                                                                              |
| Forman 2016                          | Forman EM, Butryn ML, Manasse SM, et al. Acceptance-based versus standard behavioral treatment for obesity: Results from the mind your health randomized controlled trial. <i>Obesity (Silver Spring)</i> 2016; <b>24</b> (10): 2050-6.                                                             |
| Foster-Schubert 2012                 | Foster-Schubert KE, Alfano CM, Duggan CR, et al. Effect of diet and exercise, alone or combined, on weight and body composition in overweight-to-obese postmenopausal women. <i>Obesity (Silver Spring)</i> 2012; <b>20</b> (8): 1628-38.                                                           |
| Freitas 2017                         | Freitas PD, Ferreira PG, Silva AG, et al. The Role of Exercise in a Weight-Loss Program on Clinical Control in Obese Adults with Asthma. A Randomized Controlled Trial. <i>Am J Respir Crit Care Med</i> 2017; <b>195</b> (1): 32-42.                                                               |

| Study ID        | Primary reference                                                                                                                                                                                                                                                                                                                 |
|-----------------|-----------------------------------------------------------------------------------------------------------------------------------------------------------------------------------------------------------------------------------------------------------------------------------------------------------------------------------|
| Fuller 2012     | Fuller NR, Lau NS, Denyer G, Caterson ID. A 12-month, randomised, controlled trial to examine the efficacy of the Korean diet in an Australian overweight and obese population - A follow up analysis. <i>Obes Res Clin Pract</i> 2012; <b>6</b> (4): e263-346.                                                                   |
| Gold 2007       | Gold BC, Burke S, Pintauro S, Buzzell P, Harvey-Berino J. Weight loss on the web: A pilot study comparing a structured behavioral intervention to a commercial program. <i>Obesity (Silver Spring)</i> 2007; <b>15</b> (1): 155-64.                                                                                               |
| Goodwin 2014    | Goodwin PJ, Segal RJ, Vallis M, et al. Randomized trial of a telephone-based weight loss intervention in postmenopausal women with breast cancer receiving letrozole: the LISA trial. <i>J Clin Oncol</i> 2014; <b>32</b> (21): 2231-9.                                                                                           |
| Gorin 2013      | Gorin AA, Raynor HA, Fava J, et al. Randomized controlled trial of a comprehensive home environment-focused weight-loss program for adults. <i>Health Psychol</i> 2013; <b>32</b> (2): 128-37.                                                                                                                                    |
| Green 2015      | Green CA, Yarborough BJ, Leo MC, et al. Weight maintenance following the STRIDE lifestyle intervention for individuals taking antipsychotic medications. <i>Obesity (Silver Spring)</i> 2015; <b>23</b> (10): 1995-2001.                                                                                                          |
| Grilo 2011      | Grilo CM, Masheb RM, Wilson GT, Gueorguieva R, White MA. Cognitive-behavioral therapy, behavioral weight loss, and sequential treatment for obese patients with binge-eating disorder: a randomized controlled trial. <i>J Consult Clin Psychol</i> 2011; <b>79</b> (5): 675-85.                                                  |
| Grilo 2014      | Grilo CM, Masheb RM, White MA, et al. Treatment of binge eating disorder in racially and ethnically diverse obese patients in primary care: randomized placebo-controlled clinical trial of self-help and medication. <i>Behav Res Ther</i> 2014; <b>58</b> : 1-9.                                                                |
| Hageman 2017    | Hageman PA, Pullen CH, Hertzog M, Pozehl B, Eisenhauer C, Boeckner LS. Web-Based Interventions Alone or Supplemented with Peer-Led Support or Professional Email Counseling for Weight Loss and Weight Maintenance in Women from Rural Communities: Results of a Clinical Trial. <i>J Obes</i> 2017; <b>2017</b> : 1602627.       |
| Hakala 1993     | Hakala P, Karvetti RL, Rönnemaa T. Group vs. individual weight reduction programmes in the treatment of severe obesity--a five year follow-up study. <i>Int J Obes Relat Metab Disord</i> 1993; <b>17</b> (2): 97-102.                                                                                                            |
| Hanson 1976     | Hanson RW, Borden BL, Hall SM, Hall RG. Use of programmed instruction in teaching self-management skills to overweight adults. <i>Behavior Therapy</i> 1976; <b>7</b> (3): 366-73.                                                                                                                                                |
| Hardcastle 2013 | Hardcastle SJ, Taylor AH, Bailey MP, Harley RA, Hagger MS. Effectiveness of a motivational interviewing intervention on weight loss, physical activity and cardiovascular disease risk factors: a randomised controlled trial with a 12-month post-intervention follow-up. <i>Int J Behav Nutr Phys Act</i> 2013; <b>10</b> : 40. |
| Harrigan 2016   | Harrigan M, Cartmel B, Loftfield E, et al. Randomized Trial Comparing Telephone Versus In-Person Weight Loss Counseling on Body Composition and Circulating Biomarkers in Women Treated for Breast Cancer: The Lifestyle, Exercise, and Nutrition (LEAN) Study. <i>J Clin Oncol</i> 2016; <b>34</b> (7): 669-76.                  |
| Harris 2017     | Harris L, Hankey C, Jones N, et al. A cluster randomised control trial of a multi-component weight management programme for adults with intellectual disabilities and obesity. <i>Br J Nutr</i> 2017; <b>118</b> (3): 229-40.                                                                                                     |
| Hunt 2014       | Hunt K, Wyke S, Gray CM, et al. A gender-sensitised weight loss and healthy living programme for overweight and obese men delivered by Scottish Premier League football clubs (FFIT): a pragmatic randomised controlled trial. <i>Lancet</i> 2014; <b>383</b> (9924): 1211-21.                                                    |
| Huseinovic 2016 | Huseinovic E, Bertz F, Leu Agelii M, Hellebö Johansson E, Winkvist A, Brekke HK. Effectiveness of a weight loss intervention in postpartum women: results from a randomized controlled trial in primary health care. <i>Am J Clin Nutr</i> 2016; <b>104</b> (2): 362-70.                                                          |
| Irwin 2003      | Irwin ML, Yasui Y, Ulrich CM, et al. Effect of exercise on total and intra-abdominal body fat in postmenopausal women: a randomized controlled trial. <i>JAMA</i> 2003; <b>289</b> (3): 323-30.                                                                                                                                   |
| Jackson 1982    | Jackson HJ, Thorbecke PJ. Treating obesity of mentally retarded adolescents and adults: an exploratory program. <i>Am J Ment Defic</i> 1982; <b>87</b> (3): 302-8.                                                                                                                                                                |
| Jackson 2018    | Jackson JB, Pietrabissa G, Rossi A, Manzoni GM, Castelnuovo G. Brief strategic therapy and cognitive behavioral therapy for women with binge eating disorder and comorbid obesity: A randomized clinical trial one-year follow-up. <i>J Consult Clin Psychol</i> 2018; <b>86</b> (8): 688-701.                                    |

| Study ID       | Primary reference                                                                                                                                                                                                                                                               |
|----------------|---------------------------------------------------------------------------------------------------------------------------------------------------------------------------------------------------------------------------------------------------------------------------------|
| Jakicic 2011   | Jakicic JM, Otto AD, Lang W, et al. The effect of physical activity on 18-month weight change in overweight adults. <i>Obesity (Silver Spring)</i> 2011; <b>19</b> (1): 100-9.                                                                                                  |
| Jakicic 2015   | Jakicic JM, Rickman AD, Lang W, et al. Time-based physical activity interventions for weight loss: a randomized trial. <i>Med Sci Sports Exerc</i> 2015; <b>47</b> (5): 1061-9.                                                                                                 |
| Jebb 2011      | Jebb SA, Ahern AL, Olson AD, et al. Primary care referral to a commercial provider for weight loss treatment versus standard care: a randomised controlled trial. <i>Lancet</i> 2011; <b>378</b> (9801): 1485-92.                                                               |
| Jebb 2017      | Jebb SA, Astbury NM, Teame S, Nickless A, Aveyard P. Doctor Referral of Overweight People to a Low-Energy Treatment (DROPLET) in primary care using total diet replacement products: a protocol for a randomised controlled trial. <i>BMJ open</i> 2017; <b>7</b> (8): e016709. |
| Jeffery 1995   | Jeffery RW, Wing RR. Long-term effects of interventions for weight loss using food provision and monetary incentives. <i>J Consult Clin Psychol</i> 1995; <b>63</b> (5): 793-6.                                                                                                 |
| Jeffery 2003   | Jeffery RW, Wing RR, Sherwood NE, Tate DF. Physical activity and weight loss: does prescribing higher physical activity goals improve outcome? <i>Am J Clin Nutr</i> 2003; <b>78</b> (4): 684-9.                                                                                |
| Jenkins 2017   | Jenkins DJA, Boucher BA, Ashbury FD, et al. Effect of Current Dietary Recommendations on Weight Loss and Cardiovascular Risk Factors. <i>J Am Coll Cardiol</i> 2017; <b>69</b> (9): 1103-12.                                                                                    |
| John 2011      | John LK, Loewenstein G, Troxel AB, Norton L, Fassbender JE, Volpp KG. Financial incentives for extended weight loss: a randomized, controlled trial. <i>J Gen Intern Med</i> 2011; <b>26</b> (6): 621-6.                                                                        |
| Jolly 2011     | Jolly K, Lewis A, Beach J, et al. Comparison of range of commercial or primary care led weight reduction programmes with minimal intervention control for weight loss in obesity: lighten Up randomised controlled trial. <i>BMJ</i> 2011; <b>343</b> : d6500.                  |
| Jones 1986     | Jones SE, Owens HM, Bennett GA. Does behaviour therapy work for dietitians? An experimental evaluation of the effects of three procedures in a weight reduction clinic. <i>Hum Nutr Appl Nutr</i> 1986; <b>40</b> (4): 272-81.                                                  |
| Jones 1999     | Jones DW, Miller ME, Wofford MR, et al. The effect of weight loss intervention on antihypertensive medication requirements in the hypertension Optimal Treatment (HOT) study. <i>Am J Hypertens</i> 1999; <b>12</b> (12 Pt 1-2): 1175-80.                                       |
| Katula 2013    | Katula JA, Vitolins MZ, Morgan TM, et al. The Healthy Living Partnerships to Prevent Diabetes study: 2-year outcomes of a randomized controlled trial. <i>Am J Prev Med</i> 2013; <b>44</b> (4 Suppl 4): S324-32.                                                               |
| Katzer 2008    | Katzer L, Bradshaw AJ, Horwath CC, Gray AR, O'Brien S, Joyce J. Evaluation of a "nondietering" stress reduction program for overweight women: a randomized trial. <i>Am J Health Promot</i> 2008; <b>22</b> (4): 264-74.                                                        |
| Keogh 2014     | Keogh JB, Pedersen E, Petersen KS, Clifton PM. Effects of intermittent compared to continuous energy restriction on short-term weight loss and long-term weight loss maintenance. <i>Clin Obes</i> 2014; <b>4</b> (3): 150-6.                                                   |
| Keranen 2009   | Keränen AM, Savolainen MJ, Reponen AH, et al. The effect of eating behavior on weight loss and maintenance during a lifestyle intervention. <i>Prev Med</i> 2009; <b>49</b> (1): 32-8.                                                                                          |
| King 1989      | King AC, Frey-Hewitt B, Dreon DM, Wood PD. Diet vs exercise in weight maintenance. The effects of minimal intervention strategies on long-term outcomes in men. <i>Arch Intern Med</i> 1989; <b>149</b> (12): 2741-6.                                                           |
| Kingsley 1977  | Kingsley RG, Wilson GT. Behavior therapy for obesity: a comparative investigation of long-term efficacy. <i>J Consult Clin Psychol</i> 1977; <b>45</b> (2): 288-98.                                                                                                             |
| Knauper 2018   | Knäuper B, Carrière K, Frayn M, et al. The Effects of If-Then Plans on Weight Loss: Results of the McGill CHIP Healthy Weight Program Randomized Controlled Trial. <i>Obesity (Silver Spring)</i> 2018; <b>26</b> (8): 1285-95.                                                 |
| Kuller 2012    | Kuller LH, Pettee Gabriel KK, Kinzel LS, et al. The Women on the Move Through Activity and Nutrition (WOMAN) study: final 48-month results. <i>Obesity (Silver Spring)</i> 2012; <b>20</b> (3): 636-43.                                                                         |
| Kumanyika 2012 | Kumanyika SK, Fassbender JE, Sarwer DB, et al. One-year results of the Think Health! study of weight management in primary care practices. <i>Obesity (Silver Spring)</i> 2012; <b>20</b> (6): 1249-57.                                                                         |

| Study ID       | Primary reference                                                                                                                                                                                                                                                                                                  |
|----------------|--------------------------------------------------------------------------------------------------------------------------------------------------------------------------------------------------------------------------------------------------------------------------------------------------------------------|
| Leahey 2014    | Leahey TM, Thomas G, Fava JL, et al. Adding evidence-based behavioral weight loss strategies to a statewide wellness campaign: a randomized clinical trial. <i>Am J Public Health</i> 2014; <b>104</b> (7): 1300-6.                                                                                                |
| Leahey 2015    | Leahey TM, Subak LL, Fava J, et al. Benefits of adding small financial incentives or optional group meetings to a web-based statewide obesity initiative. <i>Obesity (Silver Spring)</i> 2015; <b>23</b> (1): 70-6.                                                                                                |
| Lejeune 2003   | Lejeune MP, Van Aggel-Leijssen DP, Van Baak MA, Westerterp-Plantenga MS. Effects of dietary restraint vs exercise during weight maintenance in obese men. <i>Eur J Clin Nutr</i> 2003; <b>57</b> (10): 1338-44.                                                                                                    |
| Ley 2004       | Ley SJ, Metcalf PA, Scragg RK, Swinburn BA. Long-term effects of a reduced fat diet intervention on cardiovascular disease risk factors in individuals with glucose intolerance. <i>Diabetes Res Clin Pract</i> 2004; <b>63</b> (2): 103-12.                                                                       |
| Li 2016        | Li X, Cai X, Ma X, et al. Short- and Long-Term Effects of Wholegrain Oat Intake on Weight Management and Glucolipid Metabolism in Overweight Type-2 Diabetics: A Randomized Control Trial. <i>Nutrients</i> 2016; <b>8</b> (9).                                                                                    |
| Li 2005        | Li Z, Hong K, Saltsman P, et al. Long-term efficacy of soy-based meal replacements vs an individualized diet plan in obese type II DM patients: relative effects on weight loss, metabolic parameters, and C-reactive protein. <i>Eur J Clin Nutr</i> 2005; <b>59</b> (3): 411-8                                   |
| Lindstrom 2003 | Lindström J, Louheranta A, Mannelin M, et al. The Finnish Diabetes Prevention Study (DPS): Lifestyle intervention and 3-year results on diet and physical activity. <i>Diabetes care</i> 2003; <b>26</b> (12): 3230-6.                                                                                             |
| Liss 2016      | Liss DT, Finch EA, Gregory DL, Cooper A, Ackermann RT. Design and participant characteristics for a randomized effectiveness trial of an intensive lifestyle intervention to reduce cardiovascular risk in adults with type 2 diabetes: The I-D-HEALTH study. <i>Contemp Clin Trials</i> 2016; <b>46</b> : 114-21. |
| Little 2016    | Little P, Stuart B, Hobbs FR, et al. An internet-based intervention with brief nurse support to manage obesity in primary care (POWeR+): a pragmatic, parallel-group, randomised controlled trial. <i>Lancet Diabetes Endocrinol</i> 2016; <b>4</b> (10): 821-8.                                                   |
| Long 1983      | Long CG, Simpson CM, Allott EA. Psychological and dietetic counselling combined in the treatment of obesity: a comparative study in a hospital outpatient clinic. <i>Hum Nutr Appl Nutr</i> 1983; <b>37</b> (2): 94-102.                                                                                           |
| Lowe 2018      | Lowe MR, Butryn ML, Zhang F. Evaluation of meal replacements and a home food environment intervention for long-term weight loss: a randomized controlled trial. <i>Am J Clin Nutr</i> <b>107</b> (1): 12-9.                                                                                                        |
| Ma 2015        | Ma J, Strub P, Xiao L, et al. Behavioral weight loss and physical activity intervention in obese adults with asthma. A randomized trial. <i>Ann Am Thorac Soc</i> 2015; <b>12</b> (1): 1-11.                                                                                                                       |
| Manning 1994   | Manning RM, Jung RT, Leese GP, Newton RW. The comparison of four weight reduction strategies aimed at overweight diabetic patients. <i>Diabet Med</i> ; <b>12</b> (5): 409-15.                                                                                                                                     |
| Manzoni 2016   | Manzoni GM, Cesa GL, Bacchetta M, et al. Virtual Reality-Enhanced Cognitive-Behavioral Therapy for Morbid Obesity: A Randomized Controlled Study with 1 Year Follow-Up. <i>Cyberpsychol Behav Soc Netw</i> 2016; <b>19</b> (2): 134-40.                                                                            |
| Marniemi 1990  | Marniemi J, Seppänen A, Hakala P. Long-term effects on lipid metabolism of weight reduction on lactovegetarian and mixed diet. <i>Inter J Obes</i> 1990; <b>14</b> (2): 113-25.                                                                                                                                    |
| Martin 2008    | Martin PD, Dutton GR, Rhode PC, Horswell RL, Ryan DH, Brantley PJ. Weight loss maintenance following a primary care intervention for low-income minority women. <i>Obesity (Silver Spring)</i> 2008; <b>16</b> (11): 2462-7.                                                                                       |
| Mefferd 2007   | Mefferd K, Nichols JF, Pakiz B, Rock CL. A cognitive behavioral therapy intervention to promote weight loss improves body composition and blood lipid profiles among overweight breast cancer survivors. <i>Breast Cancer Res Treat</i> 2007; <b>104</b> (2): 145-52.                                              |
| Melchart 2017  | Melchart D, Löw P, Wühr E, Kehl V, Weidenhammer W. Effects of a tailored lifestyle self-management intervention (TALENT) study on weight reduction: a randomized controlled trial. <i>Diabetes Metab Syndr Obes</i> 2017; <b>10</b> : 235-45.                                                                      |
| Melin 2003     | Melin I, Karlström B, Lappalainen R, Berglund L, Mohsen R, Vessby B. A programme of behaviour modification and nutrition counselling in the treatment of obesity: a randomised 2-y clinical trial. <i>Int J Obes Relat Metab Disord</i> 2003; <b>27</b> (9): 1127-35.                                              |



| Study ID        | Primary reference                                                                                                                                                                                                                                                                     |
|-----------------|---------------------------------------------------------------------------------------------------------------------------------------------------------------------------------------------------------------------------------------------------------------------------------------|
| Menard 2005     | Ménard J, Payette H, Baillargeon JP, et al. Efficacy of intensive multitherapy for patients with type 2 diabetes mellitus: a randomized controlled trial. <i>CMAJ</i> 2005; <b>173</b> (12): 1457-66.                                                                                 |
| Mengham 1999    | Mengham L, Morris B, Palmer C, White A. Is intensive dietetic intervention effective for overweight patients with diabetes mellitus? A randomized controlled study in a general practice. <i>Pract Diab Int</i> 1999; <b>16</b> (1): 5-8.                                             |
| Mensingher 2016 | Mensingher JL, Calogero RM, Stranges S, Tylka TL. A weight-neutral versus weight-loss approach for health promotion in women with high BMI: A randomized-controlled trial. <i>Appetite</i> 2016; <b>105</b> : 364-74.                                                                 |
| Messier 2013    | Messier SP, Mihalko SL, Legault C, et al. Effects of intensive diet and exercise on knee joint loads, inflammation, and clinical outcomes among overweight and obese adults with knee osteoarthritis: the IDEA randomized clinical trial. <i>JAMA</i> 2013; <b>310</b> (12): 1263-73. |
| Miller 2002     | Miller ER, 3rd, Erlinger TP, Young DR, et al. Results of the Diet, Exercise, and Weight Loss Intervention Trial (DEW-IT). <i>Hypertension</i> 2002; <b>40</b> (5): 612-8.                                                                                                             |
| Mitsui 2008     | Mitsui T, Shimaoka K, Tsuzuku S, Kajioka T, Sakakibara H. Gentle exercise of 40 minutes with dietary counseling is effective in treating metabolic syndrome. <i>Tohoku J Exp Med</i> 2008; <b>215</b> (4): 355-61                                                                     |
| Molenaar 2010   | Molenaar EA, van Ameijden EJ, Vergouwe Y, Grobbee DE, Numans ME. Effect of nutritional counselling and nutritional plus exercise counselling in overweight adults: a randomized trial in multidisciplinary primary care practice. <i>Fam Pract</i> 2010; <b>27</b> (2): 143-50.       |
| Moreno 2014     | Moreno B, Bellido D, Sajoux I, et al. Comparison of a very low-calorie-ketogenic diet with a standard low-calorie diet in the treatment of obesity. <i>Endocrine</i> 2014; <b>47</b> (3): 793-805.                                                                                    |
| Morgan 2010     | Morgan PJ, Lubans DR, Collins CE, Warren JM, Callister R. 12-month outcomes and process evaluation of the SHED-IT RCT: an internet-based weight loss program targeting men. <i>Obesity (Silver Spring)</i> 2011; <b>19</b> (1): 142-51.                                               |
| Muggia 2014     | Muggia C, Falchi AG, Michelini I, et al. Brief group cognitive behavioral treatment in addition to prescriptive diet versus standard care in obese and overweight patients. A randomized controlled trial. <i>e-SPEN</i> 2014; <b>9</b> (1): e26-e33.                                 |
| Munsch 2003     | Munsch S, Biedert E, Keller U. Evaluation of a lifestyle change programme for the treatment of obesity in general practice. <i>Swiss Med Wkly</i> 2003; <b>133</b> (9-10): 148-54.                                                                                                    |
| Munsch 2007     | Munsch S, Biedert E, Meyer A, et al. A randomized comparison of cognitive behavioral therapy and behavioral weight loss treatment for overweight individuals with binge eating disorder. <i>The Int J Eat Disord</i> 2007; <b>40</b> (2): 102-13.                                     |
| Murphy 1982     | Murphy JK, Williamson DA, Buxton AE, Moody SC, Absher N, Warner M. The long-term effects of spouse involvement upon weight loss and maintenance. <i>Behavior Therapy</i> 1982; <b>13</b> (5): 681-93.                                                                                 |
| Nakata 2014     | Nakata Y, Okada M, Hashimoto K, Harada Y, Sone H, Tanaka K. Weight loss maintenance for 2 years after a 6-month randomised controlled trial comparing education-only and group-based support in Japanese adults. <i>Obes Facts</i> 2014; <b>7</b> (6): 376-87                         |
| Nanchahal 2012  | Nanchahal K, Power T, Holdsworth E, et al. A pragmatic randomised controlled trial in primary care of the Camden Weight Loss (CAMWEL) programme. <i>BMJ open</i> 2012; <b>2</b> (3).                                                                                                  |
| Ng 2015         | Ng SSS, Chan RSM, Woo J, et al. A Randomized Controlled Study to Examine the Effect of a Lifestyle Modification Program in OSA. <i>Chest</i> 2015; <b>148</b> (5): 1193-203.                                                                                                          |
| Nicklas 2004    | Nicklas BJ, Ambrosius W, Messier SP, et al. Diet-induced weight loss, exercise, and chronic inflammation in older, obese adults: a randomized controlled clinical trial. <i>Am J Clin Nutr</i> 2004; <b>79</b> (4): 544-51.                                                           |
| Nicklas 2009    | Nicklas BJ, Wang X, You T, et al. Effect of exercise intensity on abdominal fat loss during calorie restriction in overweight and obese postmenopausal women: a randomized, controlled trial. <i>Am J Clin Nutr</i> ; <b>89</b> (4): 1043-52.                                         |
| Nilsen 2011     | Nilsen V, Bakke PS, Gallefoss F. Effects of lifestyle intervention in persons at risk for type 2 diabetes mellitus - results from a randomised, controlled trial. <i>BMC public health</i> 2011; <b>11</b> : 893.                                                                     |
| Nordby 2012     | Nordby P, Auerbach PL, Rosenkilde M, et al. Endurance training per se increases metabolic health in young, moderately overweight men. <i>Obesity (Silver Spring)</i> 2012; <b>20</b> (11): 2202-12.                                                                                   |

| Study ID        | Primary reference                                                                                                                                                                                                                                                                                         |
|-----------------|-----------------------------------------------------------------------------------------------------------------------------------------------------------------------------------------------------------------------------------------------------------------------------------------------------------|
| Nurkkala 2015   | Nurkkala M, Kaikkonen K, Vanhala ML, Karhunen L, Keränen AM, Korpelainen R. Lifestyle intervention has a beneficial effect on eating behavior and long-term weight loss in obese adults. <i>Eat Behav</i> 2015; <b>18</b> : 179-85.                                                                       |
| Oldroyd 2006    | Oldroyd JC, Unwin NC, White M, Mathers JC, Alberti KG. Randomised controlled trial evaluating lifestyle interventions in people with impaired glucose tolerance. <i>Diabetes Res Clin Pract</i> 2006; <b>72</b> (2): 117-27.                                                                              |
| Pan 1997        | Pan XR, Li GW, Hu YH, et al. Effects of diet and exercise in preventing NIDDM in people with impaired glucose tolerance. The Da Qing IGT and Diabetes Study. <i>Diabetes Care</i> 1997; <b>20</b> (4): 537-44.                                                                                            |
| Parikh 2010     | Parikh P, Simon EP, Fei K, Looker H, Goytia C, Horowitz CR. Results of a pilot diabetes prevention intervention in East Harlem, New York City: Project HEED. <i>Am J Public Health</i> 2010; <b>100</b> Suppl 1(Suppl 1): S232-9.                                                                         |
| Patel 2016      | Patel MS, Asch DA, Troxel AB, et al. Premium-Based Financial Incentives Did Not Promote Workplace Weight Loss In A 2013-15 Study. <i>Health Aff (Millwood)</i> 2016; <b>35</b> (1): 71-9.                                                                                                                 |
| Pavlou 1989a    | Pavlou KN, Krey S, Steffee WP. Exercise as an adjunct to weight loss and maintenance in moderately obese subjects. <i>Am J Clin Nutr</i> 1989; <b>49</b> (5 Suppl): 1115-23.                                                                                                                              |
| Pavlou 1989b    | Pavlou KN, Krey S, Steffee WP. Exercise as an adjunct to weight loss and maintenance in moderately obese subjects. <i>Am J Clin Nutr</i> 1989; <b>49</b> (5 Suppl): 1115-23.                                                                                                                              |
| Pearce 1981     | Pearce JW, LeBow MD, Orchard J. Role of spouse involvement in the behavioral treatment of overweight women. <i>J Consult Clin Psychol</i> 1981; <b>49</b> (2): 236-44.                                                                                                                                    |
| Pedersen 2013   | Pedersen LR, Olsen RH, Frederiksen M, et al. Copenhagen study of overweight patients with coronary artery disease undergoing low energy diet or interval training: the randomized CUT-IT trial protocol. <i>BMC Cardiovasc Disord</i> 2013; <b>13</b> : 106.                                              |
| Pekkarinen 2015 | Pekkarinen T, Kaukua J, Mustajoki P. Long-term weight maintenance after a 17-week weight loss intervention with or without a one-year maintenance program: a randomized controlled trial. <i>J Obes</i> 2015; <b>2015</b> : 651460.                                                                       |
| Perri 1984      | Perri MG, Shapiro RM, Ludwig WW, Twentyman CT, McAdoo WG. Maintenance strategies for the treatment of obesity: an evaluation of relapse prevention training and posttreatment contact by mail and telephone. <i>J Consult Clin Psychol</i> 1984; <b>52</b> (3): 404-13.                                   |
| Perri 1986      | Perri MG, McAdoo WG, McAllister DA, Lauer JB, Yancey DZ. Enhancing the efficacy of behavior therapy for obesity: effects of aerobic exercise and a multicomponent maintenance program. <i>J Consult Clin Psychol</i> 1986; <b>54</b> (5): 670-5.                                                          |
| Perri 1987      | Perri MG, McAdoo WG, McAllister DA, et al. Effects of peer support and therapist contact on long-term weight loss. <i>J Consult Clin Psychol</i> 1987; <b>55</b> (4): 615-7                                                                                                                               |
| Perri 1989      | Perri MG, Nezu AM, Patti ET, McCann KL. Effect of length of treatment on weight loss. <i>J Consult Clin Psychol</i> 1989; <b>57</b> (3): 450-2.                                                                                                                                                           |
| Perri 1997      | Perri MG, Martin AD, Leermakers EA, Sears SF, Notelovitz M. Effects of group- versus home-based exercise in the treatment of obesity. <i>J Consult Clin Psychol</i> 1997; <b>65</b> (2): 278-85.                                                                                                          |
| Perri 2001      | Perri MG, Nezu AM, McKelvey WF, Shermer RL, Renjilian DA, Viegner BJ. Relapse prevention training and problem-solving therapy in the long-term management of obesity. <i>J Consult Clin Psychol</i> 2001; <b>69</b> (4): 722-6.                                                                           |
| Perri 2014      | Perri MG, Limacher MC, von Castel-Roberts K, et al. Comparative effectiveness of three doses of weight-loss counseling: two-year findings from the rural LITE trial. <i>Obesity (Silver Spring)</i> 2014; <b>22</b> (11): 2293-300.                                                                       |
| Pettman 2009    | Pettman TL, Buckley JD, Misan GM, Coates AM, Howe PR. Health benefits of a 4-month group-based diet and lifestyle modification program for individuals with metabolic syndrome. <i>Obes Res Clin Pract</i> 2009; <b>3</b> (4): 221-35.                                                                    |
| Poelman 2015    | Poelman MP, de Vet E, Velema E, de Boer MR, Seidell JC, Steenhuis IH. PortionControl@HOME: results of a randomized controlled trial evaluating the effect of a multi-component portion size intervention on portion control behavior and body mass index <i>Ann Behav Med</i> 2015; <b>49</b> (1): 18-28. |
| Promrat 2010    | Promrat K, Kleiner DE, Niemeier HM, et al. Randomized controlled trial testing the effects of weight loss on nonalcoholic steatohepatitis. <i>Hepatology</i> 2010; <b>51</b> (1): 121-9.                                                                                                                  |

| Study ID        | Primary reference                                                                                                                                                                                                                                                              |
|-----------------|--------------------------------------------------------------------------------------------------------------------------------------------------------------------------------------------------------------------------------------------------------------------------------|
| Provencher 2009 | Provencher V, Bégin C, Tremblay A, et al. Health-At-Every-Size and eating behaviors: 1-year follow-up results of a size acceptance intervention. <i>J Am Diet Assoc</i> 2009; <b>109</b> (11): 1854-61.                                                                        |
| Ptomey 2018     | Ptomey LT, Saunders RR, Saunders M, et al. Weight management in adults with intellectual and developmental disabilities: A randomized controlled trial of two dietary approaches. <i>J Appl Res Intellect Disabil</i> 2018; <b>31 Suppl 1</b> : 82-96.                         |
| Ramirez 2001    | Ramirez EM, Rosen JC. A comparison of weight control and weight control plus body image therapy for obese men and women. <i>J Consult Clin Psychol</i> 2001; <b>69</b> (3): 440-6.                                                                                             |
| Rejeski 2011    | Rejeski WJ, Brubaker PH, Goff DC, Jr., et al. Translating weight loss and physical activity programs into the community to preserve mobility in older, obese adults in poor cardiovascular health. <i>Arch Internal Med</i> 2011; <b>171</b> (10): 880-6.                      |
| Ridgeway 1999   | Ridgeway NA, Harvill DR, Harvill LM, Falin TM, Forester GM, Gose OD. Improved control of type 2 diabetes mellitus: a practical education/behavior modification program in a primary care clinic. <i>South Med J</i> 1999; <b>92</b> (7): 667-72.                               |
| Rock 2015       | Rock CL, Flatt SW, Byers TE, et al. Results of the Exercise and Nutrition to Enhance Recovery and Good Health for You (ENERGY) Trial: A Behavioral Weight Loss Intervention in Overweight or Obese Breast Cancer Survivors. <i>J Clin Oncol</i> 2015; <b>33</b> (28): 3169-76. |
| Rolls 2005      | Rolls BJ, Roe LS, Beach AM, Kris-Etherton PM. Provision of foods differing in energy density affects long-term weight loss. <i>Obes Res</i> 2005; <b>13</b> (6): 1052-60.                                                                                                      |
| Rolls 2017      | Rolls BJ, Roe LS, James BL, Sanchez CE. Does the incorporation of portion-control strategies in a behavioral program improve weight loss in a 1-year randomized controlled trial? <i>Int J Obes (Lond)</i> 2017; <b>41</b> (3): 434-42.                                        |
| Rosas 2015      | Rosas LG, Thiyagarajan S, Goldstein BA, et al. The effectiveness of two community-based weight loss strategies among obese, low-income US Latinos. <i>J Acad Nutr Diet</i> 2015; <b>115</b> (4): 537-50.e2.                                                                    |
| Ross 2012       | Ross R, Lam M, Blair SN, et al. Trial of prevention and reduction of obesity through active living in clinical settings: a randomized controlled trial. <i>Arch Intern Med</i> 2012; <b>172</b> (5): 414-24.                                                                   |
| Samaras 1997    | Samaras K, Ashwell S, Mackintosh AM, Fleury AC, Campbell LV, Chisholm DJ. Will older sedentary people with non-insulin-dependent diabetes mellitus start exercising? A health promotion model. <i>Diabetes Res Clin Pract</i> 1997; <b>37</b> (2): 121-8.                      |
| Santanasto 2011 | Santanasto AJ, Glynn NW, Newman MA, et al. Impact of weight loss on physical function with changes in strength, muscle mass, and muscle fat infiltration in overweight to moderately obese older adults: a randomized clinical trial. <i>J Obes</i> 2011; <b>2011</b> .        |
| Sattin 2016     | Sattin RW, Williams LB, Dias J, et al. Community Trial of a Faith-Based Lifestyle Intervention to Prevent Diabetes Among African-Americans. <i>J Community Health</i> 2016; <b>41</b> (1): 87-96.                                                                              |
| Schubel 2016    | Schübel R, Graf ME, Nattenmüller J, et al. The effects of intermittent calorie restriction on metabolic health: Rationale and study design of the HELENA Trial. <i>Contemp Clin Trials</i> 2016; <b>51</b> : 28-33.                                                            |
| Seligman 2011   | Seligman BG, Polanczyk CA, Santos AS, et al. Intensive practical lifestyle intervention improves endothelial function in metabolic syndrome independent of weight loss: a randomized controlled trial. <i>Metabolism</i> 2011; <b>60</b> (12): 1736-40.                        |
| Shikany 2013    | Shikany JM, Thomas AS, Beasley TM, Lewis CE, Allison DB. Randomized controlled trial of the Medifast 5 & 1 Plan for weight loss. <i>Int J Obes (Lond)</i> 2013; <b>37</b> (12): 1571-8.                                                                                        |
| Sikand 1988     | Sikand G, Kondo A, Foreyt JP, Jones PH, Gotto AM, Jr. Two-year follow-up of patients treated with a very-low-calorie diet and exercise training. <i>J Am Diet Assoc</i> 1988; <b>88</b> (4): 487-8.                                                                            |
| Silva 2010      | Silva MN, Vieira PN, Coutinho SR, et al. Using self-determination theory to promote physical activity and weight control: a randomized controlled trial in women. <i>J Behav Med</i> 2010; <b>33</b> (2): 110-22.                                                              |
| Snel 2012       | Snel M, Sleddering MA, Vd Peijl ID, et al. Quality of life in type 2 diabetes mellitus after a very low calorie diet and exercise. <i>Eur J Intern Med</i> 2012; <b>23</b> (2): 143-9.                                                                                         |

| Study ID                           | Primary reference                                                                                                                                                                                                                                                                                                |
|------------------------------------|------------------------------------------------------------------------------------------------------------------------------------------------------------------------------------------------------------------------------------------------------------------------------------------------------------------|
| Solbrig 2019                       | Solbrig L, Whalley B, Kavanagh DJ, et al. Functional imagery training versus motivational interviewing for weight loss: a randomised controlled trial of brief individual interventions for overweight and obesity. <i>Int J Obes (Lond)</i> 2019; <b>43</b> (4): 883-94.                                        |
| Somers 2012                        | Somers TJ, Blumenthal JA, Guilak F, et al. Pain coping skills training and lifestyle behavioral weight management in patients with knee osteoarthritis: a randomized controlled study. <i>Pain</i> 2012; <b>153</b> (6): 1199-209.                                                                               |
| Spring 2013                        | Spring B, Duncan JM, Janke EA, et al. Integrating technology into standard weight loss treatment: a randomized controlled trial. <i>JAMA Intern Med</i> 2013; <b>173</b> (2): 105-11.                                                                                                                            |
| Spring 2017                        | Spring B, Pellegrini CA, Pfammatter A, et al. Effects of an abbreviated obesity intervention supported by mobile technology: The ENGAGED randomized clinical trial. <i>Obesity (Silver Spring)</i> 2017; <b>25</b> (7): 1191-8.                                                                                  |
| Stahre 2005                        | Stahre L, Hällström T. A short-term cognitive group treatment program gives substantial weight reduction up to 18 months from the end of treatment. A randomized controlled trial. <i>Eat Weight Disord</i> 2005; <b>10</b> (1): 51-8.                                                                           |
| Stahre 2007                        | Stahre L, Tärnell B, Håkanson CE, Hällström T. A randomized controlled trial of two weight-reducing short-term group treatment programs for obesity with an 18-month follow-up. <i>Int J Behav Med</i> 2007; <b>14</b> (1): 48-55                                                                                |
| Stalonas 1978                      | Stalonas PM, Jr., Johnson WG, Christ M. Behavior modification for obesity: the evaluation of exercise, contingency management, and program adherence. <i>J Consult Clin Psychol</i> 1978; <b>46</b> (3): 463-9.                                                                                                  |
| Stenius-Aarniala 2000              | Stenius-Aarniala B, Poussa T, Kvamström J, Grönlund EL, Ylikahri M, Mustajoki P. Immediate and long term effects of weight reduction in obese people with asthma: randomised controlled study. <i>BMJ</i> 2000; <b>320</b> (7238): 827-32.                                                                       |
| Stevens 1993                       | Stevens VJ, Corrigan SA, Obarzanek E, et al. Weight loss intervention in phase I of the Trials of Hypertension Prevention. The TOHP Collaborative Research Group. <i>Arch Intern Med</i> 1993; <b>153</b> (7): 849-58.                                                                                           |
| Stevens 2001                       | Stevens VJ, Obarzanek E, Cook NR, et al. Long-term weight loss and changes in blood pressure: results of the Trials of Hypertension Prevention, phase II. <i>Ann Intern Med</i> 2001; <b>134</b> (1): 1-11.                                                                                                      |
| Stolley 2017                       | Stolley M, Sheean P, Gerber B, et al. Efficacy of a Weight Loss Intervention for African American Breast Cancer Survivors. <i>J Clin Oncol</i> 2017; <b>35</b> (24): 2820-8.                                                                                                                                     |
| Strobl 2013                        | Ströbl V, Knisel W, Landgraf U, Faller H. A combined planning and telephone aftercare intervention for obese patients: effects on physical activity and body weight after one year. <i>J Rehabil Med</i> 2013; <b>45</b> (2): 198-205.                                                                           |
| Sundfor 2018                       | Sundfør TM, Svendsen M, Tonstad S. Effect of intermittent versus continuous energy restriction on weight loss, maintenance and cardiometabolic risk: A randomized 1-year trial. <i>Nutr Metab Cardiovasc Dis</i> 2018; <b>28</b> (7): 698-706.                                                                   |
| Tapsell 2017                       | Tapsell LC, Lonergan M, Batterham MJ, et al. Effect of interdisciplinary care on weight loss: a randomised controlled trial. <i>BMJ open</i> 2017; <b>7</b> (7): e014533.                                                                                                                                        |
| TarragaMarcos 2017                 | Tárraga Marcos ML, Panisello Royo JM, Carbayo Herencia JA, Rosich Domenech N, Alins Presas J, Tárraga López PJ. Effect on the lipid parameters of an intervention to reduce weight in overweight and obese patients. <i>Clin Investig Arterioscler</i> 2017; <b>29</b> (3): 103-10.                              |
| Teeriniemi 2018                    | Teeriniemi AM, Salonurmi T, Jokelainen T, et al. A randomized clinical trial of the effectiveness of a Web-based health behaviour change support system and group lifestyle counselling on body weight loss in overweight and obese subjects: 2-year outcomes. <i>J Intern Med</i> 2018; <b>284</b> (5): 534-45. |
| ter Bogt 2009                      | ter Bogt NC, Bemelmans WJ, Beltman FW, Broer J, Smit AJ, van der Meer K. Preventing weight gain: one-year results of a randomized lifestyle intervention. <i>Am J Prev Med</i> 2009; <b>37</b> (4): 270-7.                                                                                                       |
| The Look AHEAD Research Group 2010 | Wing RR. Long-term effects of a lifestyle intervention on weight and cardiovascular risk factors in individuals with type 2 diabetes mellitus: four-year results of the Look AHEAD trial. <i>Arch Intern Med</i> 2010; <b>170</b> (17): 1566-75.                                                                 |
| Trepanowski 2017                   | Trepanowski JF, Kroeger CM, Bamosky A, et al. Effect of Alternate-Day Fasting on Weight Loss, Weight Maintenance, and Cardioprotection Among Metabolically Healthy Obese Adults: A Randomized Clinical Trial. <i>JAMA Intern Med</i> 2017; <b>177</b> (7): 930-8.                                                |
| Tsai 2010                          | Tsai AG, Wadden TA, Rogers MA, Day SC, Moore RH, Islam BJ. A primary care intervention for weight loss: results of a randomized controlled pilot study. <i>Obesity (Silver Spring)</i> 2010; <b>18</b> (8): 1614-8.                                                                                              |

| Study ID              | Primary reference                                                                                                                                                                                                                                                                                  |
|-----------------------|----------------------------------------------------------------------------------------------------------------------------------------------------------------------------------------------------------------------------------------------------------------------------------------------------|
| Tuomilehto 2009       | Tuomilehto HP, Seppä JM, Partinen MM, et al. Lifestyle intervention with weight reduction: first-line treatment in mild obstructive sleep apnea. <i>Am J Respir Crit Care Med</i> 2009; <b>179</b> (4): 320-7.                                                                                     |
| van de Glind 2017     | van de Glind I, Bunn C, Gray CM, et al. The intervention process in the European Fans in Training (EuroFIT) trial: a mixed method protocol for evaluation. <i>Trials</i> 2017; <b>18</b> (1): 356.                                                                                                 |
| vanWier 2011          | van Wier MF, Dekkers JC, Hendriksen IJ, et al. Effectiveness of phone and e-mail lifestyle counseling for long term weight control among overweight employees. <i>J Occup Environ Med</i> 2011; <b>53</b> (6): 680-6.                                                                              |
| Viegner 1990          | Viegner BJ, Renjilian DA, McKelvey WF, Schein RL, Perri MG, Nezu AM. Effects of an intermittent, low-fat, low-calorie diet in the behavioral treatment of obesity. <i>Behavior Therapy</i> 1990; <b>21</b> (4): 499-509.                                                                           |
| Vissers 2010          | Vissers D, Verrijken A, Mertens I, et al. Effect of long-term whole body vibration training on visceral adipose tissue: a preliminary report. <i>Obes Facts</i> 2010; <b>3</b> (2): 93-100.                                                                                                        |
| Volpe 2008            | Volpe SL, Kobusingye H, Bailur S, Stanek E. Effect of diet and exercise on body composition, energy intake and leptin levels in overweight women and men. <i>J Am Coll Nutr</i> 2008 <b>27</b> (2): 195-208.                                                                                       |
| von Gruenigen 2012    | von Gruenigen V, Frasure H, Kavanagh MB, et al. Survivors of uterine cancer empowered by exercise and healthy diet (SUCCEED): a randomized controlled trial. <i>Gynecologic oncology</i> 2012; <b>125</b> (3): 699-704.                                                                            |
| vonGruenigen 2008     | von Gruenigen VE, Coumeya KS, Gibbons HE, Kavanagh MB, Waggoner SE, Lerner E. Feasibility and effectiveness of a lifestyle intervention program in obese endometrial cancer patients: a randomized trial. <i>Gynecol Oncol</i> 2008; <b>109</b> (1): 19-26.                                        |
| Wadden 1986           | Wadden TA, Stunkard AJ. Controlled trial of very low calorie diet, behavior therapy, and their combination in the treatment of obesity. <i>J Consult Clin Psychol</i> 1986; <b>54</b> (4): 482-8.                                                                                                  |
| Wadden 1994           | Wadden TA, Foster GD, Letizia KA. One-year behavioral treatment of obesity: comparison of moderate and severe caloric restriction and the effects of weight maintenance therapy. <i>J Consult Clin Psychol</i> 1994; <b>62</b> (1): 165-71.                                                        |
| Wadden 1998           | Wadden TA, Vogt RA, Foster GD, Anderson DA. Exercise and the maintenance of weight loss: 1-year follow-up of a controlled clinical trial. <i>J Consult Clin Psychol</i> 1998; <b>66</b> (2): 429-33.                                                                                               |
| Wadden 2004           | Wadden TA, Foster GD, Sarwer DB, et al. Dieting and the development of eating disorders in obese women: results of a randomized controlled trial. <i>Am J Clin Nutr</i> 2004; <b>80</b> (3): 560-8.                                                                                                |
| Waleekhachonloet 2007 | Waleekhachonloet OA, Limwattananon C, Limwattananon S, Gross CR. Group behavior therapy versus individual behavior therapy for healthy dieting and weight control management in overweight and obese women living in rural community. <i>Obes Res Clin Pract</i> 2007; <b>1</b> (4): 223-90.       |
| Weinstock 2013        | Weinstock RS, Trief PM, Cibula D, Morin PC, Delahanty LM. Weight loss success in metabolic syndrome by telephone interventions: results from the SHINE Study. <i>J Gen Intern Med</i> 2013; <b>28</b> (12): 1620-8.                                                                                |
| West 2007             | West DS, DiLillo V, Bursac Z, Gore SA, Greene PG. Motivational interviewing improves weight loss in women with type 2 diabetes. <i>Diabetes Care</i> 2007; <b>30</b> (5): 1081-7.                                                                                                                  |
| West 2011             | West DS, Bursac Z, Cornell CE, et al. Lay health educators translate a weight-loss intervention in senior centers: a randomized controlled trial. <i>Am J Prev Med</i> 2011; <b>41</b> (4): 385-91.                                                                                                |
| West 2016             | West DS, Harvey JR, Krukowski RA, Prewitt TE, Priest J, Ashikaga T. Do individual, online motivational interviewing chat sessions enhance weight loss in a group-based, online weight control program? <i>Obesity (Silver Spring)</i> 2016; <b>24</b> (11): 2334-40.                               |
| Whelton 1998          | Whelton PK, Appel LJ, Espeland MA, et al. Sodium reduction and weight loss in the treatment of hypertension in older persons: a randomized controlled trial of nonpharmacologic interventions in the elderly (TONE). TONE Collaborative Research Group. <i>JAMA</i> 1998; <b>279</b> (11): 839-46. |
| Wilson 2010           | Wilson GT, Wilfley DE, Agras WS, Bryson SW. Psychological treatments of binge eating disorder. <i>Arch Gen Psychiatry</i> 2010; <b>67</b> (1): 94-101.                                                                                                                                             |

| Study ID         | Primary reference                                                                                                                                                                                                                                                                       |
|------------------|-----------------------------------------------------------------------------------------------------------------------------------------------------------------------------------------------------------------------------------------------------------------------------------------|
| Wilson 2016      | Wilson MG, DeJoy DM, Vandenberg RJ, Corso P, Padilla H, Zuercher H. Effect of Intensity and Program Delivery on the Translation of Diabetes Prevention Program to Worksites: A Randomized Controlled Trial of Fuel Your Life. <i>J Occup Environ Med</i> 2016; <b>58</b> (11): 1113-20. |
| Wilson 2016b     | Wilson MG, DeJoy DM, Vandenberg R, Padilla H, Davis M. FUEL Your Life: A Translation of the Diabetes Prevention Program to Worksites. <i>Am J Health Promot</i> 2016; <b>30</b> (3): 188-97.                                                                                            |
| Wing 1985        | Wing RR, Epstein LH, Nowalk MP, Koeske R, Hagg S. Behavior change, weight loss, and physiological improvements in type II diabetic patients. <i>J Consult Clin Psychol</i> 1985; <b>53</b> (1): 111-22.                                                                                 |
| Wing 1988        | Wing RR, Epstein LH, Paternostro-Bayles M, Kriska A, Nowalk MP, Gooding W. Exercise in a behavioural weight control programme for obese patients with Type 2 (non-insulin-dependent) diabetes. <i>Diabetologia</i> 1988; <b>31</b> (12): 902-9.                                         |
| Wing 1988b       | Wing RR, Epstein LH, Paternostro-Bayles M, Kriska A, Nowalk MP, Gooding W. Exercise in a behavioural weight control programme for obese patients with Type 2 (non-insulin-dependent) diabetes. <i>Diabetologia</i> 1988; <b>31</b> (12): 902-9.                                         |
| Wing 1991        | Wing RR, Marcus MD, Salata R, Epstein LH, Miasiewicz S, Blair EH. Effects of a very-low-calorie diet on long-term glycemic control in obese type 2 diabetic subjects. <i>Arch Intern Med</i> 1991; <b>151</b> (7): 1334-40.                                                             |
| Wing 1996        | Wing RR, Jeffery RW, Burton LR, Thorson C, Nissinoff KS, Baxter JE. Food provision vs structured meal plans in the behavioral treatment of obesity. <i>Int J Obes Relat Metab Disord</i> 1996; <b>20</b> (1): 56-62.                                                                    |
| Wing 1998        | Wing RR, Venditti E, Jakicic JM, Polley BA, Lang W. Lifestyle intervention in overweight individuals with a family history of diabetes. <i>Diabetes Care</i> 1998; <b>21</b> (3): 350-9.                                                                                                |
| Wing 2003        | Wing RR, Jeffery RW. Prescribed "breaks" as a means to disrupt weight control efforts. <i>Obes Res</i> 2003; <b>11</b> (2): 287-91.                                                                                                                                                     |
| Wing 2010        | Wing RR, West DS, Grady D, et al. Effect of weight loss on urinary incontinence in overweight and obese women: results at 12 and 18 months. <i>J Urol</i> 2010; <b>184</b> (3): 1005-10.                                                                                                |
| Yannakoulia 2008 | Yannakoulia M, Poulia KA, Mylona E, Kontogianni MD. Effectiveness of an intensive nutritional intervention in patients with type 2 diabetes mellitus: results from a pilot study. <i>Rev Diabet Stud</i> 2007; <b>4</b> (4): 226-30.                                                    |
| Yardley 2014     | Yardley L, Ware LJ, Smith ER, et al. Randomised controlled feasibility trial of a web-based weight management intervention with nurse support for obese patients in primary care. <i>Int J Behav Nutr Phys Act</i> 2014; <b>11</b> : 67.                                                |
| Yates 2009       | Yates T, Davies M, Gorely T, Bull F, Khunti K. Effectiveness of a pragmatic education program designed to promote walking activity in individuals with impaired glucose tolerance: a randomized controlled trial. <i>Diabetes Care</i> 2009; <b>32</b> (8): 1404-10.                    |
| Yates 2018       | Yates MS, Coletta AM, Zhang Q, et al. Prospective Randomized Biomarker Study of Metformin and Lifestyle Intervention for Prevention in Obese Women at Increased Risk for Endometrial Cancer. <i>Cancer Prev Res (Phila)</i> 2018; <b>11</b> (8): 477-90                                 |
| Yeh 2003         | Yeh MC, Rodriguez E, Nawaz H, Gonzalez M, Nakamoto D, Katz DL. Technical skills for weight loss: 2-y follow-up results of a randomized trial. <i>Int J Obes Relat Metab Disord</i> 2003; <b>27</b> (12): 1500-6.                                                                        |
| Yeh 2016         | Yeh MC, Heo M, Suchday S, et al. Translation of the Diabetes Prevention Program for diabetes risk reduction in Chinese immigrants in New York City. <i>Diabet Med</i> 2016; <b>33</b> (4): 547-51.                                                                                      |
| Yin 2018         | Yin Z, Perry J, Duan X, et al. Cultural adaptation of an evidence-based lifestyle intervention for diabetes prevention in Chinese women at risk for diabetes: results of a randomized trial. <i>Int Health</i> 2018; <b>10</b> (5): 391-400.                                            |
| Zhang 2016       | Zhang HJ, He J, Pan LL, et al. Effects of Moderate and Vigorous Exercise on Nonalcoholic Fatty Liver Disease: A Randomized Clinical Trial. <i>JAMA Internal Med</i> 2016; <b>176</b> (8): 1074-82.                                                                                      |
| Zwickert 2016    | Zwickert K, Rieger E, Swinbourne J, et al. High or low intensity text-messaging combined with group treatment equally promote weight loss maintenance in obese adults. <i>Obes Res Clin Pract</i> 2016; <b>10</b> (6): 680-91.                                                          |

**Table 2. Risk of bias of included studies**

| Study ID | Random sequence generation<br>(Selection bias) | Allocation concealment<br>(Selection bias)                                                                                                                           | Blinding of outcome<br>assessment<br>(Detection bias)                                                                                                                                                                                                                                                                                                         | Incomplete outcome data<br>(Attrition bias)                                                                             | Other bias                                                                                                                                                                                              |                                                                                                                                                                                                                                                                                                                      |
|----------|------------------------------------------------|----------------------------------------------------------------------------------------------------------------------------------------------------------------------|---------------------------------------------------------------------------------------------------------------------------------------------------------------------------------------------------------------------------------------------------------------------------------------------------------------------------------------------------------------|-------------------------------------------------------------------------------------------------------------------------|---------------------------------------------------------------------------------------------------------------------------------------------------------------------------------------------------------|----------------------------------------------------------------------------------------------------------------------------------------------------------------------------------------------------------------------------------------------------------------------------------------------------------------------|
| <b>1</b> | <b>Abed 2013</b>                               | UNCLEAR                                                                                                                                                              | UNCLEAR                                                                                                                                                                                                                                                                                                                                                       | LOW                                                                                                                     | LOW                                                                                                                                                                                                     | HIGH                                                                                                                                                                                                                                                                                                                 |
|          | Assessment justification:                      | Single-centre, partially blinded RCT.                                                                                                                                | No explicit information regarding allocation concealment provided:<br><br>Study coordinators, treating physicians, and other personnel, with the exception of weight loss counselors, were blinded to randomization. Patients were instructed not to disclose their status. Patient records contained generic statements without indicating group allocation. | Weight objectively measured.                                                                                            | At 12 months, 109 (73%) had completed the study (57 in the intervention group and 52 in the control group). By 15 months, 81 (54%) remained (42 in the intervention group and 39 in the control group). | Weight data at 3, 6, 9 and 12 months from a sub-study (Abed 2015). 87 participants agreed to CMR (cardiac magnetic resonance) imaging (43 in control group, 44 in intervention group at baseline). 69 participants had baseline and 12-month follow-up (33 in control group, 36 in intervention group at 12 months). |
| <b>2</b> | <b>Ackermann 2011</b>                          | UNCLEAR                                                                                                                                                              | UNCLEAR                                                                                                                                                                                                                                                                                                                                                       | LOW                                                                                                                     | LOW                                                                                                                                                                                                     |                                                                                                                                                                                                                                                                                                                      |
|          | Assessment justification:                      | "matched-pair, group-randomized pilot intervention trial involving two YMCA facilities in greater Indianapolis." No further information provided regarding matching. | NS                                                                                                                                                                                                                                                                                                                                                            | Body weight was measured using a calibrated, beam-balanced scale with participants wearing light clothing and no shoes. | Less than 50% attrition at 12-month follow-up.                                                                                                                                                          |                                                                                                                                                                                                                                                                                                                      |
| <b>3</b> | <b>Agras 1990</b>                              | LOW                                                                                                                                                                  | UNCLEAR                                                                                                                                                                                                                                                                                                                                                       | LOW                                                                                                                     | LOW                                                                                                                                                                                                     |                                                                                                                                                                                                                                                                                                                      |
|          | Assessment justification:                      | "computer generated table of random numbers"                                                                                                                         | NS                                                                                                                                                                                                                                                                                                                                                            | Weight objectively measured.                                                                                            | 12-months follow-up:<br>29/30 computer alone; 29/30 computer + group;<br>30/30 behaviour therapy                                                                                                        |                                                                                                                                                                                                                                                                                                                      |
| <b>4</b> | <b>Ahern 2017</b>                              | LOW                                                                                                                                                                  | LOW                                                                                                                                                                                                                                                                                                                                                           | LOW                                                                                                                     | LOW                                                                                                                                                                                                     |                                                                                                                                                                                                                                                                                                                      |

| Study ID |                               | Random sequence generation<br>(Selection bias)                                                                                                                                  | Allocation concealment<br>(Selection bias)                     | Blinding of outcome<br>assessment<br>(Detection bias)                                                                            | Incomplete outcome data<br>(Attrition bias)                                                                                                                                                                                                                                                                                                                                                                             | Other bias |
|----------|-------------------------------|---------------------------------------------------------------------------------------------------------------------------------------------------------------------------------|----------------------------------------------------------------|----------------------------------------------------------------------------------------------------------------------------------|-------------------------------------------------------------------------------------------------------------------------------------------------------------------------------------------------------------------------------------------------------------------------------------------------------------------------------------------------------------------------------------------------------------------------|------------|
|          | Assessment justification:     | "The randomisation sequence was generated by the trial statistician and allocates participants in a 2:5:5 allocation stratified by centre and gender, with a block size of 12." | " The sequence is unknown to research staff and participants." | Weight objectively measured.<br>"Weight and fat mass will be measured in kg using a Tanita segmental body composition analyser." | 3-months retention rate:<br>Brief intervention: 68%;<br>12-week programme: 76.4%;<br>52-week programme: 86.2%;<br><br>12-month retention rate:<br>Brief intervention: 58.7%;<br>12-week programme: 63.9%;<br>52-week programme: 68.2%;<br><br>24-month retention rate:<br>Brief intervention: 63%;<br>12-week programme: 67%;<br>52-week programme: 69.7%;                                                              |            |
| <b>5</b> | <b>Almanza -Aguilera 2018</b> | UNCLEAR                                                                                                                                                                         | UNCLEAR                                                        | LOW                                                                                                                              | HIGH                                                                                                                                                                                                                                                                                                                                                                                                                    |            |
|          | Assessment justification:     | Participants were randomly allocated to either the control or the treatment group.<br><br>No further information given.                                                         | NS                                                             | "Anthropometric measurements, including weight, height, waist circumference (WC), and BMI, were taken by trained nurses..."      | "Of the 115 participants recruited, 58 were excluded due to dropout or failure to show at all visits (n = 43), illness (n = 6), unavailable sample at some time point (at baseline, 3 or 12 months, n = 7), or change of residence (n = 2). Therefore, 57 participants were included in the present data analyses." Control n = 27 analysed out of 48 randomised; Treatment n = 30 analysed out of 67 (44.7% retained). |            |
| <b>6</b> | <b>Ames 2005</b>              | UNCLEAR                                                                                                                                                                         | UNCLEAR                                                        | UNCLEAR                                                                                                                          | HIGH                                                                                                                                                                                                                                                                                                                                                                                                                    |            |



| Study ID |                           | Random sequence generation<br>(Selection bias)                                                                                                                                                           | Allocation concealment<br>(Selection bias) | Blinding of outcome<br>assessment<br>(Detection bias)                                                                                                  | Incomplete outcome data<br>(Attrition bias)                                                                                                                                                                                                                                                                                                                                                                                                                                            | Other bias |
|----------|---------------------------|----------------------------------------------------------------------------------------------------------------------------------------------------------------------------------------------------------|--------------------------------------------|--------------------------------------------------------------------------------------------------------------------------------------------------------|----------------------------------------------------------------------------------------------------------------------------------------------------------------------------------------------------------------------------------------------------------------------------------------------------------------------------------------------------------------------------------------------------------------------------------------------------------------------------------------|------------|
|          | Assessment justification: | <p>“Women who met the eligibility criteria were stratified based on a median split of BMI and were subsequently randomized to one of two treatment conditions.”</p> <p>No further information given.</p> | NS                                         | NS                                                                                                                                                     | <p>“The high rate of attrition during the Phase I run-in period represents a limitation of this study.”</p> <p>“Following screening, 80 women met the eligibility criteria for randomization; 67 enrolled in the study and attended the first week of treatment.”</p> <p>28 participants completed the Phase I run-in period and entered the Phase II experimental stage. 26 of the 28 participants who started Phase II of the program completed participation through Phase III.</p> |            |
| <b>7</b> | <b>Andersen 1999</b>      | UNCLEAR                                                                                                                                                                                                  | UNCLEAR                                    | LOW                                                                                                                                                    | LOW                                                                                                                                                                                                                                                                                                                                                                                                                                                                                    |            |
|          | Assessment justification: | <p>“Participants were randomly assigned to 1 of the 2 conditions described above.”</p> <p>No further information given.</p>                                                                              | NS                                         | <p>Weight objectively measured.</p> <p>Where a subjective component potentially existed (e.g. measurement of aerobic fitness), tester was blinded.</p> | <p>40 randomized</p> <p>38 completed 16-week follow-up;</p> <p>33 completed 68-week follow-up.</p>                                                                                                                                                                                                                                                                                                                                                                                     |            |
| <b>8</b> | <b>Anderson 2014</b>      | LOW                                                                                                                                                                                                      | LOW                                        | LOW                                                                                                                                                    | LOW                                                                                                                                                                                                                                                                                                                                                                                                                                                                                    |            |

| Study ID  |                           | Random sequence generation<br>(Selection bias)                                                                                                                                                                                                                                                    | Allocation concealment<br>(Selection bias)                                                                                                                                                                                                                                                                                                                                                                                                                                                                                              | Blinding of outcome<br>assessment<br>(Detection bias)                                                                                                                                                                                                                                                                                                                                                              | Incomplete outcome data<br>(Attrition bias)                                                                                                                                                                                                                                            | Other bias |
|-----------|---------------------------|---------------------------------------------------------------------------------------------------------------------------------------------------------------------------------------------------------------------------------------------------------------------------------------------------|-----------------------------------------------------------------------------------------------------------------------------------------------------------------------------------------------------------------------------------------------------------------------------------------------------------------------------------------------------------------------------------------------------------------------------------------------------------------------------------------------------------------------------------------|--------------------------------------------------------------------------------------------------------------------------------------------------------------------------------------------------------------------------------------------------------------------------------------------------------------------------------------------------------------------------------------------------------------------|----------------------------------------------------------------------------------------------------------------------------------------------------------------------------------------------------------------------------------------------------------------------------------------|------------|
|           | Assessment justification: | “A statistician, independent of the analysis of study outcomes, had previously generated a randomisation list (site specific identification numbers and group allocation) by using a permuted block technique, with block sizes of four and eight, stratified by trial site.”                     | “This list was emailed to the study administrator and trial manager. Research nurses allocated participants a site specific identification number sequentially and notified the study administrator on completion of baseline measures for each participant. The study administrator then identified the participant’s group allocation from the randomisation list and notified the lifestyle counsellor of participants allocated to the intervention group or sent the weight loss booklet to participants allocated to usual care.” | Weight objectively measured.<br>“The study team, including the research nurses, were blinded to the participant’s group allocation until completion of the primary outcome analysis. Exceptions were the trial manager, study administrator, lifestyle counsellors, and participants who could not be blinded owing to the nature of the intervention. None of these unblinded staff had a role in data analysis.” | “The remaining 329 were randomised (163 to intervention, 166 to control). At three months 314 (94% intervention, 97% control) participants had completed the primary outcome measures, and 305 (91% intervention, 95% control) completed the trial at 12 months (93%).”                |            |
| <b>9</b>  | <b>Annesi 2016</b>        | UNCLEAR                                                                                                                                                                                                                                                                                           | UNCLEAR                                                                                                                                                                                                                                                                                                                                                                                                                                                                                                                                 | LOW                                                                                                                                                                                                                                                                                                                                                                                                                | LOW                                                                                                                                                                                                                                                                                    |            |
|           | Assessment justification: | NS                                                                                                                                                                                                                                                                                                | NS                                                                                                                                                                                                                                                                                                                                                                                                                                                                                                                                      | Weight objectively measured.                                                                                                                                                                                                                                                                                                                                                                                       | "Attrition from initial study acceptance to actual treatment participation was minimal at 7% and also did not significantly differ by group."                                                                                                                                          |            |
| <b>10</b> | <b>Annesi 2017</b>        | UNCLEAR                                                                                                                                                                                                                                                                                           | UNCLEAR                                                                                                                                                                                                                                                                                                                                                                                                                                                                                                                                 | LOW                                                                                                                                                                                                                                                                                                                                                                                                                | LOW                                                                                                                                                                                                                                                                                    |            |
|           | Assessment justification: | "To avoid cross-contamination of participants and instructors, randomisation to either the experimental (n=53) or comparison (n=54) condition was by the participating community wellness centres (3 for each condition)."<br><br>Unclear if cluster randomised.<br>No further information given. | To minimise expectation and cross-contamination effects, wellness leaders were trained in only 1 of the protocols by study staff and blinded to study goals.<br>No further information given.                                                                                                                                                                                                                                                                                                                                           | Weight objectively measured.                                                                                                                                                                                                                                                                                                                                                                                       | “Because the requirement of data being missing at random (no systematic bias) was present, the expectation-maximisation algorithm was used for the 12% of cases necessitating imputation within the present intention-to-treat format.”<br>Indicates 12% drop out, so 94/107 completed |            |
| <b>11</b> | <b>Appel 2011</b>         | LOW                                                                                                                                                                                                                                                                                               | LOW                                                                                                                                                                                                                                                                                                                                                                                                                                                                                                                                     | LOW                                                                                                                                                                                                                                                                                                                                                                                                                | LOW                                                                                                                                                                                                                                                                                    |            |

| Study ID  |                           | Random sequence generation<br>(Selection bias)                                                                                                                           | Allocation concealment<br>(Selection bias)                                                                            | Blinding of outcome<br>assessment<br>(Detection bias)                                                                                                                                                                                                             | Incomplete outcome data<br>(Attrition bias)                                                                                                                                                                                                                                                                                                                          | Other bias |
|-----------|---------------------------|--------------------------------------------------------------------------------------------------------------------------------------------------------------------------|-----------------------------------------------------------------------------------------------------------------------|-------------------------------------------------------------------------------------------------------------------------------------------------------------------------------------------------------------------------------------------------------------------|----------------------------------------------------------------------------------------------------------------------------------------------------------------------------------------------------------------------------------------------------------------------------------------------------------------------------------------------------------------------|------------|
|           | Assessment justification: | "Randomization was stratified according to sex and was generated in blocks of 3 and 6 with the use of a Web-based program."                                              | Web-based program.                                                                                                    | "Participants were asked to make in-person follow-up visits 6, 12, and 24 months after randomization. At each of these visits, weight was measured on a high-quality, calibrated digital scale, with the participant wearing light, indoor clothes and no shoes." | 6-month follow-up: Control: 113/138*100= 81.9%;<br>Remote: 129/139*100 = 92.8%;<br>In-person: 124/138*100 = 89.9%<br><br>12-month follow-up: Control: 108/138*100= 78.3%;<br>Remote: 124/139*100 = 89.2%;<br>In-person: 123/138*100 = 89.1%<br><br>24-month follow-up : Control: 129/138*100= 93.5%;<br>Remote: 132/139*100 = 95%;<br>In-person: 133/138*100 = 96.4% |            |
| <b>12</b> | <b>Ard 2004</b>           | LOW                                                                                                                                                                      | LOW                                                                                                                   | LOW                                                                                                                                                                                                                                                               | LOW                                                                                                                                                                                                                                                                                                                                                                  |            |
|           | Assessment justification: | Randomization assignments were made centrally by a computer program. Assignments were stratified by clinic and hypertension status; the randomization block size was 24. | Randomization assignments were made centrally by a computer program.                                                  | Weight was measured using a calibrated scale.                                                                                                                                                                                                                     | Less than 25% attrition at 6-month and 18-months follow-up.                                                                                                                                                                                                                                                                                                          |            |
| <b>13</b> | <b>Ard 2018</b>           | LOW                                                                                                                                                                      | LOW                                                                                                                   | LOW                                                                                                                                                                                                                                                               | LOW                                                                                                                                                                                                                                                                                                                                                                  |            |
|           | Assessment justification: | The statistician generated blocked random assignments using a computer-based algorithm, stratified by age category (65–74, 75+), sex, and race.                          | Allocations were concealed in sealed envelopes that were opened by a research assistant at the time of randomization. | Body weight was measured in light clothing on calibrated electronic scales to the nearest 0.1 pound and converted to kilograms.                                                                                                                                   | Less than 50% attrition.                                                                                                                                                                                                                                                                                                                                             |            |
| <b>14</b> | <b>Ash 2006</b>           | LOW                                                                                                                                                                      | UNCLEAR                                                                                                               | LOW                                                                                                                                                                                                                                                               | HIGH                                                                                                                                                                                                                                                                                                                                                                 |            |

| Study ID  |                           | Random sequence generation<br>(Selection bias)                                                                                                                                                                                                                                 | Allocation concealment<br>(Selection bias) | Blinding of outcome<br>assessment<br>(Detection bias)                                                                                                                                                                                                                                                                                                                                                                                       | Incomplete outcome data<br>(Attrition bias)                                                                                                                                                                                                                                             | Other bias |
|-----------|---------------------------|--------------------------------------------------------------------------------------------------------------------------------------------------------------------------------------------------------------------------------------------------------------------------------|--------------------------------------------|---------------------------------------------------------------------------------------------------------------------------------------------------------------------------------------------------------------------------------------------------------------------------------------------------------------------------------------------------------------------------------------------------------------------------------------------|-----------------------------------------------------------------------------------------------------------------------------------------------------------------------------------------------------------------------------------------------------------------------------------------|------------|
|           | Assessment justification: | Randomised by the project manager, using a random number table, into one of three intervention groups at one of two hospital sites. The allocation ratio for the two hospital sites (public and private) was 2:1 due to available resources for implementing the intervention. | NS                                         | Weight objectively measured.                                                                                                                                                                                                                                                                                                                                                                                                                | BO = 20/54 complete data 37%<br>IDT = 44/65 complete data 66.7%<br>FBI = 26/57 complete data 45.6%<br>Significant between group difference in drop out and people who dropped out had significantly higher baseline BMI. At 12 months 24 BO, 49 IDT and 29 FBI had weight measurements. |            |
| <b>15</b> | <b>Ashley 2001</b>        | UNCLEAR                                                                                                                                                                                                                                                                        | UNCLEAR                                    | LOW                                                                                                                                                                                                                                                                                                                                                                                                                                         | HIGH                                                                                                                                                                                                                                                                                    |            |
|           | Assessment justification: | NS                                                                                                                                                                                                                                                                             | NS                                         | Weight objectively measured. Certified technicians took blood pressure and body composition measurements. Fasting blood was taken for measuring serum lipids (total cholesterol, low density lipoprotein [LDL] cholesterol, high-density lipoprotein [HDL] cholesterol, and triglycerides), glucose, and insulin by a certified phlebotomist. Blood values were analyzed by standard methods at a statewide, certified clinical laboratory. | 12-months:<br>74/113 completed all assessments: LOW<br>24-months:<br>39/113 completed all assessments: HIGH                                                                                                                                                                             |            |
| <b>16</b> | <b>Ashley 2007</b>        | UNCLEAR                                                                                                                                                                                                                                                                        | UNCLEAR                                    | LOW                                                                                                                                                                                                                                                                                                                                                                                                                                         | LOW                                                                                                                                                                                                                                                                                     |            |

| Study ID  |                           | Random sequence generation<br>(Selection bias)                                                                                                                                                                                                                                                                                                                                                                                                                                                                                                                                                                                                                                                                                                                                                                                                                                                                                                     | Allocation concealment<br>(Selection bias)                                                                                                                                                                                       | Blinding of outcome<br>assessment<br>(Detection bias)                                                                                                                                                                                | Incomplete outcome data<br>(Attrition bias)                        | Other bias |
|-----------|---------------------------|----------------------------------------------------------------------------------------------------------------------------------------------------------------------------------------------------------------------------------------------------------------------------------------------------------------------------------------------------------------------------------------------------------------------------------------------------------------------------------------------------------------------------------------------------------------------------------------------------------------------------------------------------------------------------------------------------------------------------------------------------------------------------------------------------------------------------------------------------------------------------------------------------------------------------------------------------|----------------------------------------------------------------------------------------------------------------------------------------------------------------------------------------------------------------------------------|--------------------------------------------------------------------------------------------------------------------------------------------------------------------------------------------------------------------------------------|--------------------------------------------------------------------|------------|
|           | Assessment justification: | NS                                                                                                                                                                                                                                                                                                                                                                                                                                                                                                                                                                                                                                                                                                                                                                                                                                                                                                                                                 | NS                                                                                                                                                                                                                               | Weight objectively measured. Waist circumference was measured at the narrowest point of the torso using a nonstretchable measuring tape. Blood pressure was measured while the subject was seated using a digital manometer machine. | 12-months: 70/96 completed (35 from each group)                    |            |
| <b>17</b> | <b>Aveyard 2016</b>       | LOW                                                                                                                                                                                                                                                                                                                                                                                                                                                                                                                                                                                                                                                                                                                                                                                                                                                                                                                                                | LOW                                                                                                                                                                                                                              | LOW                                                                                                                                                                                                                                  | LOW                                                                |            |
|           | Assessment justification: | “An independent statistician used Stata Software version 12 to produce a randomisation list that was stratified by physician, with random permuted blocks of four.”                                                                                                                                                                                                                                                                                                                                                                                                                                                                                                                                                                                                                                                                                                                                                                                | “Randomisation was done via preprepared randomisation cards labelled with a code representing the allocation, which were placed in opaque sealed envelopes and given to physicians to open at the time of treatment assignment.” | Weight objectively measured.                                                                                                                                                                                                         | “We weighed 1419 (75%) of participants at the 12-month follow-up.” |            |
| <b>18</b> | <b>Azar 2013</b>          | LOW                                                                                                                                                                                                                                                                                                                                                                                                                                                                                                                                                                                                                                                                                                                                                                                                                                                                                                                                                | LOW                                                                                                                                                                                                                              | LOW                                                                                                                                                                                                                                  | LOW                                                                |            |
|           | Assessment justification: | Participants are randomized on a 1:1:1 basis to one of three arms: UC, SM, or CM. Pocock's "minimization" procedure is used to assure better than chance group balance with respect to participant age, gender, race, BMI, fasting blood glucose, waist circumference, and use of PAMFOnline, which is PAMF's online patient portal to access his or her own health record (user vs. non-user). For each participant about to be randomized, a computerized randomization algorithm automatically calculates an imbalance score for each of the balancing factors, as the excess or deficit of previously randomized participants in each arm matching the current patient on that factor. These scores are summed over factors to form a total imbalance score, S, for each treatment arm. The randomization probability of assigning the patient to the treatment associated with the smallest S is set to 2/3, and the other two treatments are | A designated research staff member who is not involved in follow-up data collection or data analysis assigns each study arm a non-revealing label, e.g., A, B, or C, and performs actual randomization of the participants.      | Weight objectively measured.                                                                                                                                                                                                         | 171/241 participants at 24-months.                                 |            |

| Study ID  | Random sequence generation<br>(Selection bias)                          | Allocation concealment<br>(Selection bias)                                                                                                                                                                                                                                                                                                                                                                                                                              | Blinding of outcome<br>assessment<br>(Detection bias) | Incomplete outcome data<br>(Attrition bias)                                                                                                                                                                                                                                                                                                                                                     | Other bias                                                                                             |
|-----------|-------------------------------------------------------------------------|-------------------------------------------------------------------------------------------------------------------------------------------------------------------------------------------------------------------------------------------------------------------------------------------------------------------------------------------------------------------------------------------------------------------------------------------------------------------------|-------------------------------------------------------|-------------------------------------------------------------------------------------------------------------------------------------------------------------------------------------------------------------------------------------------------------------------------------------------------------------------------------------------------------------------------------------------------|--------------------------------------------------------------------------------------------------------|
|           | each assigned a probability of 1/6 based on Efron's biased coin method. |                                                                                                                                                                                                                                                                                                                                                                                                                                                                         |                                                       |                                                                                                                                                                                                                                                                                                                                                                                                 |                                                                                                        |
| <b>19</b> | <b>Bacon 2002</b>                                                       | UNCLEAR                                                                                                                                                                                                                                                                                                                                                                                                                                                                 | UNCLEAR                                               | LOW                                                                                                                                                                                                                                                                                                                                                                                             | LOW                                                                                                    |
|           | Assessment justification:                                               | “To ensure balance in the treatment groups, the enrolled subjects (n = 78) were divided into BMI quartiles, and high/ low sets for dietary restraint, 34 degrees of flexible and rigid control of eating, 35 age, and self-reported activity level. The subjects in these subgroups were then randomly assigned to one of two treatment groups.”                                                                                                                        | NS                                                    | Weight objectively measured.<br>Blood pressure was assessed in duplicate using the oscillometric technique. Fasting blood samples were analyzed for blood lipids (total cholesterol, low-density lipoprotein [LDL] cholesterol, and high-density lipoprotein [HDL] cholesterol).                                                                                                                | 52-weeks:<br>Diet group: 23/39 completed testing;<br>HAES group: 34 attended (29 completed testing)/36 |
| <b>20</b> | <b>Barnes 2017</b>                                                      | UNCLEAR                                                                                                                                                                                                                                                                                                                                                                                                                                                                 | UNCLEAR                                               | LOW                                                                                                                                                                                                                                                                                                                                                                                             | LOW                                                                                                    |
|           | Assessment justification:                                               | Participants were randomly assigned, stratified by BED diagnosis, to one of three conditions.<br><br>No further information given.                                                                                                                                                                                                                                                                                                                                      | NS                                                    | Weight objectively measured.                                                                                                                                                                                                                                                                                                                                                                    | Less than 50% attrition at 12-month follow-up.                                                         |
| <b>21</b> | <b>Bartels 2015</b>                                                     | LOW                                                                                                                                                                                                                                                                                                                                                                                                                                                                     | UNCLEAR                                               | LOW                                                                                                                                                                                                                                                                                                                                                                                             | LOW                                                                                                    |
|           | Assessment justification:                                               | “Randomization between In SHAPE and the comparison condition was stratified by age (21 to 44 years versus 45 years and older) and psychiatric diagnosis (mood disorders versus schizophrenia spectrum disorders). Each combination of stratification categories had its own randomization schedule that was blocked on every fourth assignment to ensure balance between treatment arms. Randomization was conducted sequentially across all sites (not within sites).” | NS                                                    | Weight objectively measured.<br><br>'Blood pressure was measured before (resting heart rate) and after completing the 6-MWT'<br><br>'Lipids were measured using the CardioChek PA Analyzer, a portable testing system that produces reliable values for total cholesterol, LDL, HDL, and triglycerides using a multi-panel test strip and a single drop of blood acquired with a finger prick.' | 18-months:<br>Control: 83/106 Intervention:<br>80/104                                                  |
| <b>22</b> | <b>Beavers 2017</b>                                                     | UNCLEAR                                                                                                                                                                                                                                                                                                                                                                                                                                                                 | UNCLEAR                                               | LOW                                                                                                                                                                                                                                                                                                                                                                                             | LOW                                                                                                    |
|           |                                                                         |                                                                                                                                                                                                                                                                                                                                                                                                                                                                         |                                                       |                                                                                                                                                                                                                                                                                                                                                                                                 | UNCLEAR                                                                                                |

| Study ID  |                           | Random sequence generation<br>(Selection bias)                                                                                                                                                                                   | Allocation concealment<br>(Selection bias)                                                                                          | Blinding of outcome<br>assessment<br>(Detection bias)                                                                         | Incomplete outcome data<br>(Attrition bias)                                                                                                                                                                                                            | Other bias                                                                                                                                                                              |
|-----------|---------------------------|----------------------------------------------------------------------------------------------------------------------------------------------------------------------------------------------------------------------------------|-------------------------------------------------------------------------------------------------------------------------------------|-------------------------------------------------------------------------------------------------------------------------------|--------------------------------------------------------------------------------------------------------------------------------------------------------------------------------------------------------------------------------------------------------|-----------------------------------------------------------------------------------------------------------------------------------------------------------------------------------------|
|           | Assessment justification: | "Eligible participants will be randomized to one of the three treatment arms at the end of baseline testing using a stratified (by wave) block randomization scheme."                                                            | NS                                                                                                                                  | Weight objectively measured.                                                                                                  | "At the 6-month assessment, 90.3% were retained, whereas at 18 months, this value was 77.1%. There was no differential loss to follow-up as a function of treatment group at either time point: p=.07 at 6 months and p=.268 at 18 months."            | Cholesterol, glucose and BP measured but not reported. Authors contacted however do not have statistical support to provide further analyse. Judged as unclear for selective reporting. |
| <b>23</b> | <b>Beeken 2017</b>        | LOW                                                                                                                                                                                                                              | LOW                                                                                                                                 | LOW                                                                                                                           | LOW                                                                                                                                                                                                                                                    |                                                                                                                                                                                         |
|           | Assessment justification: | "A computer-generated list of random permuted blocks of size 2–4 was used. Randomisation was stratified by PCP to ensure socioeconomic balance between groups."                                                                  | "A central telephone-based randomisation service was used to randomise at the level of the patient ensuring allocation concealment" | "All measurements at 3 months were with a health professional blind to group allocation."<br><br>Weight objectively measured. | At 12-months, 61% (Control) and 57% (10TT) were followed up.<br><br>"At 24 months, 312 (58.1%) patients were followed up. There remained very little difference in attrition between arms (41.5% in the usual care group vs 42.3% in the 10TT group)." |                                                                                                                                                                                         |
| <b>24</b> | <b>Bennett 1986</b>       | UNCLEAR                                                                                                                                                                                                                          | UNCLEAR                                                                                                                             | LOW                                                                                                                           | LOW                                                                                                                                                                                                                                                    |                                                                                                                                                                                         |
|           | Assessment justification: | NS                                                                                                                                                                                                                               | NS                                                                                                                                  | Weight objectively measured.                                                                                                  | "Of the 102 eligible subjects, 94 attended on W1, 85 on W3, 74 on W16 and 69 at F3. The use of Fisher's Exact Probability Test failed to find any evidence of significant differential attrition between treatment conditions."                        |                                                                                                                                                                                         |
| <b>25</b> | <b>Bennett 2012</b>       | LOW                                                                                                                                                                                                                              | UNCLEAR                                                                                                                             | LOW                                                                                                                           | LOW                                                                                                                                                                                                                                                    |                                                                                                                                                                                         |
|           | Assessment justification: | Participants were randomized to treatment arm using computer-generated allocations, blocked by clinic and sex.                                                                                                                   | NS                                                                                                                                  | Weight objectively measured.                                                                                                  | 24-months:<br>Usual care: 166/185<br>Intervention: 148/180                                                                                                                                                                                             |                                                                                                                                                                                         |
| <b>26</b> | <b>Bennett 2013</b>       | LOW                                                                                                                                                                                                                              | UNCLEAR                                                                                                                             | LOW                                                                                                                           | LOW                                                                                                                                                                                                                                                    |                                                                                                                                                                                         |
|           | Assessment justification: | A computer-generated randomization algorithm to allocate participants equally (1:1) across the 2 treatment arms (intervention and usual care); those in the intervention arm were further randomized to 1 of 2 interventionists. | NS                                                                                                                                  | Weight objectively measured.<br>Secondary measures included waist circumference, blood pressure, and fasting glucose,         | Usual care: 90/97<br>Intervention: 86/97                                                                                                                                                                                                               |                                                                                                                                                                                         |

| Study ID  | Random sequence generation<br>(Selection bias) | Allocation concealment<br>(Selection bias)                                                                                                                                                                                                                                                                                                                                                                                                                                                                 | Blinding of outcome<br>assessment<br>(Detection bias)                                                                                                                                                             | Incomplete outcome data<br>(Attrition bias) | Other bias                                                                                                                                                                                                 |      |
|-----------|------------------------------------------------|------------------------------------------------------------------------------------------------------------------------------------------------------------------------------------------------------------------------------------------------------------------------------------------------------------------------------------------------------------------------------------------------------------------------------------------------------------------------------------------------------------|-------------------------------------------------------------------------------------------------------------------------------------------------------------------------------------------------------------------|---------------------------------------------|------------------------------------------------------------------------------------------------------------------------------------------------------------------------------------------------------------|------|
|           |                                                |                                                                                                                                                                                                                                                                                                                                                                                                                                                                                                            | triglyceride, and cholesterol level.                                                                                                                                                                              |                                             |                                                                                                                                                                                                            |      |
| <b>27</b> | <b>Berendsen 2011</b>                          | LOW                                                                                                                                                                                                                                                                                                                                                                                                                                                                                                        | UNCLEAR                                                                                                                                                                                                           | LOW                                         | LOW                                                                                                                                                                                                        |      |
|           | Assessment justification:                      | <p>“Prior to randomization, all practices have been matched pair wise based on size and location in an urban or rural area, to create two equivalent samples of 15 practices. In each pair, one practice has been randomized to the control condition, while the other was randomized to the experimental condition. To reduce the risk of contamination within a region, practices in the same region were allocated to the same condition as the first practice in that region that was randomized.”</p> | <p>“Allocation to the conditions, however, will take place at the level of GP practices, so clustering of patients within these practices should be taken into account.”</p> <p>No further information given.</p> | Weight objectively measured.                | <p>Start up (CLI) weight data 146 at baseline; 97/146 at 12mths (LOW); 76/146 at 24mths (HIGH)</p> <p>Supervised (CLI+) weight data 223 at baseline; 137/223 at 12mths (LOW); 105/223 at 24mths (HIGH)</p> |      |
| <b>28</b> | <b>Berry 2014</b>                              | UNCLEAR                                                                                                                                                                                                                                                                                                                                                                                                                                                                                                    | LOW                                                                                                                                                                                                               | LOW                                         | LOW                                                                                                                                                                                                        | HIGH |



| Study ID |                           | Random sequence generation<br>(Selection bias)                                                                                                                                                                                                                                                                                                                                                                | Allocation concealment<br>(Selection bias)                                                      | Blinding of outcome<br>assessment<br>(Detection bias) | Incomplete outcome data<br>(Attrition bias)                                                                                                                                                                                                                                                                                                                                                                          | Other bias        |
|----------|---------------------------|---------------------------------------------------------------------------------------------------------------------------------------------------------------------------------------------------------------------------------------------------------------------------------------------------------------------------------------------------------------------------------------------------------------|-------------------------------------------------------------------------------------------------|-------------------------------------------------------|----------------------------------------------------------------------------------------------------------------------------------------------------------------------------------------------------------------------------------------------------------------------------------------------------------------------------------------------------------------------------------------------------------------------|-------------------|
|          | Assessment justification: | Cluster randomization.<br>“The sequence of each school was randomized before the start of the study and was stratified by county. A total of 18 months had passed and the first group had completed their time in the study prior to the second enrollment in each school. This design preserved a balance of treatment groups within each site to avoid confounding site effects with intervention effects.” | “Participants and staff were blinded to group assignment from enrollment until implementation.” | Weight objectively measured.                          | 59% of control group and 57% of intervention group at last follow up.<br><br>"To assess the extent of selection bias owing to attrition, the mean values for BMI percentiles were compared between those participants who did not contribute data beyond the Phase I intervention and those who did. There were no significant differences between these groups, either overall or by experimental group (P.0.35). " | Wait-list control |
| 29       | Bertram 1990              | HIGH                                                                                                                                                                                                                                                                                                                                                                                                          | UNCLEAR                                                                                         | UNCLEAR                                               | HIGH                                                                                                                                                                                                                                                                                                                                                                                                                 |                   |

| Study ID  |                           | Random sequence generation<br>(Selection bias)                                                                                                                                                                                                                                                                                                                                                             | Allocation concealment<br>(Selection bias)                   | Blinding of outcome<br>assessment<br>(Detection bias)                                                                                                                           | Incomplete outcome data<br>(Attrition bias)                                                                                                                                                                                                                                                                                                                                                                                                                                                                                                                                                                                                                                                                                                                                                                                                                                           | Other bias |
|-----------|---------------------------|------------------------------------------------------------------------------------------------------------------------------------------------------------------------------------------------------------------------------------------------------------------------------------------------------------------------------------------------------------------------------------------------------------|--------------------------------------------------------------|---------------------------------------------------------------------------------------------------------------------------------------------------------------------------------|---------------------------------------------------------------------------------------------------------------------------------------------------------------------------------------------------------------------------------------------------------------------------------------------------------------------------------------------------------------------------------------------------------------------------------------------------------------------------------------------------------------------------------------------------------------------------------------------------------------------------------------------------------------------------------------------------------------------------------------------------------------------------------------------------------------------------------------------------------------------------------------|------------|
|           | Assessment justification: | 'Randomly selected'<br>200 informed women with a body mass index (BMI) greater than 30 volunteered to participate in a 16-week study. In order to optimise compliance, only subjects who declared their willingness to be assigned to any one of the three interventions were selected. Fifteen subjects were then randomly selected for each of the above three groups, so that age and BMI were similar. | NS                                                           | NS                                                                                                                                                                              | At 16 weeks "Of the 45 subjects who started the project, 36 completed the 16-week course: 2 subjects became pregnant and were withdrawn from the exercise group, while 7 subjects 'absconded' from the control group and were lost to the study. There were no withdrawals from the lecture group. "At follow up "Unfortunately we were only able to re-test 12 of the 36 subjects who completed the original study; 18 of the remaining 24 were unable to participate either because they had changed residence or because they were employed and unable to attend re-evaluation sessions. The remaining 6 subjects admitted to having gained weight, and refused to participate in the follow up study. All 6 of these subjects were from the control group. Of the 12 subjects re-tested, 3 were from the exercise group, 7 from the lecture group, and 2 from the control group." |            |
| <b>30</b> | <b>Bertz 2012</b>         | LOW                                                                                                                                                                                                                                                                                                                                                                                                        | UNCLEAR                                                      | LOW                                                                                                                                                                             | LOW                                                                                                                                                                                                                                                                                                                                                                                                                                                                                                                                                                                                                                                                                                                                                                                                                                                                                   |            |
|           | Assessment justification: | Random number table                                                                                                                                                                                                                                                                                                                                                                                        | Allocation method not reported but described as 'concealed'. | Weight objectively measured. Body composition was measured by using dual-energy X-ray absorptiometry (DXA) (Lunar Prodigy; GE Lunar Corp). Muscle mass was calculated from DXA. | 92% followed up at 12-months, intervention 100%, D 76%, E 83%, control 76%. 4 missing (6%); 2 medical reasons (3%).                                                                                                                                                                                                                                                                                                                                                                                                                                                                                                                                                                                                                                                                                                                                                                   |            |
| <b>31</b> | <b>Beutel 2006</b>        | UNCLEAR                                                                                                                                                                                                                                                                                                                                                                                                    | UNCLEAR                                                      | LOW                                                                                                                                                                             | LOW                                                                                                                                                                                                                                                                                                                                                                                                                                                                                                                                                                                                                                                                                                                                                                                                                                                                                   |            |

| Study ID  |                           | Random sequence generation<br>(Selection bias)                                                                                                                                                                                                                                                                                                                                                                                                                 | Allocation concealment<br>(Selection bias)                                                                                                                                                                                                                                        | Blinding of outcome<br>assessment<br>(Detection bias)                                                                                                                                                                                     | Incomplete outcome data<br>(Attrition bias)                                                                                                 | Other bias |
|-----------|---------------------------|----------------------------------------------------------------------------------------------------------------------------------------------------------------------------------------------------------------------------------------------------------------------------------------------------------------------------------------------------------------------------------------------------------------------------------------------------------------|-----------------------------------------------------------------------------------------------------------------------------------------------------------------------------------------------------------------------------------------------------------------------------------|-------------------------------------------------------------------------------------------------------------------------------------------------------------------------------------------------------------------------------------------|---------------------------------------------------------------------------------------------------------------------------------------------|------------|
|           | Assessment justification: | "These 396 patients were externally randomized (random digits) either to BT or to PD. A minority of patients who were directly referred to a specific setting (usually behavioral) were excluded from randomization."                                                                                                                                                                                                                                          | NS                                                                                                                                                                                                                                                                                | Upon intake, BMI was checked based on the current weight and height. Follow-up GPs assessed blood pressure, weight and laboratory data.                                                                                                   | Behaviour treatment: 154/175 at approximately 7-weeks;<br>At 12-months:<br>97/175<br>Psychodynamic treatment:<br>168/179; 97/179 at 1 year. |            |
| <b>32</b> | <b>Bliddal 2011</b>       | UNCLEAR                                                                                                                                                                                                                                                                                                                                                                                                                                                        | UNCLEAR                                                                                                                                                                                                                                                                           | LOW                                                                                                                                                                                                                                       | HIGH                                                                                                                                        |            |
|           | Assessment justification: | "Each randomisation list was drawn up by the study statistician (RC) and given to the secreteriat at the Parker Institute, who subsequently informed patients when to meet the dietician."                                                                                                                                                                                                                                                                     | "The random allocation sequence was concealed until interventions were assigned: Each randomisation list was drawn up by the study statistician (RC) and given to the secreteriat at the Parker Institute, who subsequently informed patients when to meet the dietician."        | Weight objectively measured.                                                                                                                                                                                                              | 12-months:<br>Control 23/44;<br>LED 33/44                                                                                                   |            |
| <b>33</b> | <b>Bo 2007</b>            | LOW                                                                                                                                                                                                                                                                                                                                                                                                                                                            | LOW                                                                                                                                                                                                                                                                               | LOW                                                                                                                                                                                                                                       | LOW                                                                                                                                         |            |
|           | Assessment justification: | "The randomization procedure was automatically performed by a statistician using an SAS program developed to minimize the differences between the two groups for all stratifying variables. The patients were randomly allocated to receive either standard lifestyle recommendations from their physicians (control group, n=188) or a structured lifestyle intervention program for 1 year carried out by health professionals (intervention group, n=187)." | "Random allocation with a minimization algorithm was centrally performed in a single step. The researchers then received the two lists of nominative data. The possibility for researchers to predict or influence the allocation of participants was thus completely prevented." | Weight, waist circumference, and blood pressure were measured. Fasting glucose, insulin, triglycerides, high-density lipoprotein (HDL) cholesterol, uric acid, and hs-CRP values were measured before and after the study in both groups. | 12-months:<br>Control: 166/188<br>Intervention: 169/187                                                                                     |            |
| <b>34</b> | <b>Brown 2014</b>         | LOW                                                                                                                                                                                                                                                                                                                                                                                                                                                            | UNCLEAR                                                                                                                                                                                                                                                                           | LOW                                                                                                                                                                                                                                       | LOW                                                                                                                                         |            |
|           | Assessment justification: | Randomised block design. Computer-generated random assignment was used to assign an equal number of individuals from each risk group to the weight loss program (RENEW) or to a control group.                                                                                                                                                                                                                                                                 | NS                                                                                                                                                                                                                                                                                | Weight objectively measured.                                                                                                                                                                                                              | 136 at baseline. 92 at 12 months (47 intervention; 45 control)                                                                              |            |
| <b>35</b> | <b>Burke 2005</b>         | LOW                                                                                                                                                                                                                                                                                                                                                                                                                                                            | UNCLEAR                                                                                                                                                                                                                                                                           | LOW                                                                                                                                                                                                                                       | LOW                                                                                                                                         |            |

| Study ID  |                           | Random sequence generation<br>(Selection bias)                                                                                                                                          | Allocation concealment<br>(Selection bias) | Blinding of outcome<br>assessment<br>(Detection bias)                                                                                                               | Incomplete outcome data<br>(Attrition bias)                                                                                                                                                                                                                                                                                                                                                                                                                                                                         | Other bias |
|-----------|---------------------------|-----------------------------------------------------------------------------------------------------------------------------------------------------------------------------------------|--------------------------------------------|---------------------------------------------------------------------------------------------------------------------------------------------------------------------|---------------------------------------------------------------------------------------------------------------------------------------------------------------------------------------------------------------------------------------------------------------------------------------------------------------------------------------------------------------------------------------------------------------------------------------------------------------------------------------------------------------------|------------|
|           | Assessment justification: | Random allocation - computer-generated random numbers. Random allocation to groups was stratified by age and BMI and used a block size of 4.                                            | NS                                         | Weight objectively measured.                                                                                                                                        | Control:<br>98/118 at 4 months; 90/118 at 1 year follow up (16 months); 64/118 at 3 year follow up (40 months).<br>Intervention:<br>106/123 at 4 months; 102/123 at 16 months; 76/123 at 40 months.                                                                                                                                                                                                                                                                                                                 |            |
| <b>36</b> | <b>Burke 2015</b>         | LOW                                                                                                                                                                                     | UNCLEAR                                    | LOW                                                                                                                                                                 | LOW                                                                                                                                                                                                                                                                                                                                                                                                                                                                                                                 |            |
|           | Assessment justification: | Randomization used the minimization method. Treatment assignments were determined considering gender and ethnicity (White vs. non-White) to ensure balance across the treatment groups. | NS                                         | "Data were collected at the research center by trained staff using standardized procedures and questionnaires. Equipment was standardized and routinely calibrated" | 79.2% in SBT arm and 81% in SBT+SE arm completed 18-month assessment.                                                                                                                                                                                                                                                                                                                                                                                                                                               |            |
| <b>37</b> | <b>Cesa 2013</b>          | LOW                                                                                                                                                                                     | UNCLEAR                                    | LOW                                                                                                                                                                 | HIGH                                                                                                                                                                                                                                                                                                                                                                                                                                                                                                                |            |
|           | Assessment justification: | The randomization scheme was generated by using a randomization website.<br>Ref: Randomization. [2013-05-14]. website <a href="http://randomization.com/">http://randomization.com/</a> | NS                                         | Weight objectively measured.                                                                                                                                        | Before treatment completion (0-5 weeks), 24 patients discharged themselves from hospital (4 in ECT, 10 in CBT, and 10 in IP). 27% drop out. 66 patients remained.<br>22 patients who received all sessions did not provide follow-up data (9 in ECT, 6 in CBT, and 7 in IP).<br>44 patients completed all stages. 49% completed.<br>Paper reports "medium-high rate of nonresponders (33.4%); "66 patients intervention<br>44 patients at 1 year follow up. 66.7% completed if take initial number to be 66 people. |            |
| <b>38</b> | <b>Chaiyasoot 2018</b>    | LOW                                                                                                                                                                                     | LOW                                        | LOW                                                                                                                                                                 | LOW                                                                                                                                                                                                                                                                                                                                                                                                                                                                                                                 |            |

| Study ID  |                           | Random sequence generation<br>(Selection bias)                                                                    | Allocation concealment<br>(Selection bias)                                                                                                                                                                                                                      | Blinding of outcome<br>assessment<br>(Detection bias)                                                                                                                                                                                                                                                                                                                                                                                                                                                                                                                                                                                                                                                                                                                           | Incomplete outcome data<br>(Attrition bias)                                                                                                              | Other bias |
|-----------|---------------------------|-------------------------------------------------------------------------------------------------------------------|-----------------------------------------------------------------------------------------------------------------------------------------------------------------------------------------------------------------------------------------------------------------|---------------------------------------------------------------------------------------------------------------------------------------------------------------------------------------------------------------------------------------------------------------------------------------------------------------------------------------------------------------------------------------------------------------------------------------------------------------------------------------------------------------------------------------------------------------------------------------------------------------------------------------------------------------------------------------------------------------------------------------------------------------------------------|----------------------------------------------------------------------------------------------------------------------------------------------------------|------------|
|           | Assessment justification: | Randomly assigned (1:1 allocation) to receive either LEI or LEI + MR by a computer generated block randomisation. | “Opaque concealed envelopes were drawn by independent personnel who was not involved in the study to ensure allocation concealment. Neither the investigators nor the participants were blinded to the group allocation due to the nature of the intervention.” | Weight objectively measured.<br><br>BP and PR were obtained using an electronic sphygmomanometre (Terumo Elemano [ES-H55], Medaval, New Jersey, United States) in a comfortable sitting position after at least 15-min rest. Blood sampling was undertaken following a 12-h overnight fast. TC, HDL-c, LDL-c, TG, glucose, insulin, urine microalbumin and urine creatinine were analysed with a biochemical autoanalyser (Cobas® 8000 Modular Analyser Series, Roche Diagnostics, Indianapolis, United States). HbA1c was determined using Cobas Integra® 800 analyser, Roche Diagnostics, Indianapolis, United States. Homeostatic model assessment of insulin resistance (HOMA-IR) was calculated as: $HOMA-IR = (FPG \times \text{fasting insulin}) / 22.5$ in molar units. | LEI:<br>45/52 at 12-weeks; 44/52 at 64-weeks.<br>LEI + MR:<br>48/58 at 12-weeks;<br>42/58 at 64-weeks.                                                   |            |
| <b>39</b> | <b>Chee 2017</b>          | LOW                                                                                                               | UNCLEAR                                                                                                                                                                                                                                                         | LOW                                                                                                                                                                                                                                                                                                                                                                                                                                                                                                                                                                                                                                                                                                                                                                             | LOW                                                                                                                                                      |            |
|           | Assessment justification: | Patients were randomized using a random allocation software.                                                      | NS                                                                                                                                                                                                                                                              | Weight objectively measured.                                                                                                                                                                                                                                                                                                                                                                                                                                                                                                                                                                                                                                                                                                                                                    | UC:<br>3mth: 105/115;<br>6mth: 101/115;<br>9mth: 99/115;<br>12mth 98/115<br><br>tDNA-CC:<br>3mth: 48/57;<br>6mth: 40/57;<br>9mth: 40/57;<br>12mth: 40/57 |            |

| Study ID  | Random sequence generation<br>(Selection bias) | Allocation concealment<br>(Selection bias)                                                                                                                                                                                                   | Blinding of outcome<br>assessment<br>(Detection bias)                                                                                                                                                                               | Incomplete outcome data<br>(Attrition bias)                                                                                                                              | Other bias                                                                                                                        |                                                                                                                                                                                                                                                                                                                  |
|-----------|------------------------------------------------|----------------------------------------------------------------------------------------------------------------------------------------------------------------------------------------------------------------------------------------------|-------------------------------------------------------------------------------------------------------------------------------------------------------------------------------------------------------------------------------------|--------------------------------------------------------------------------------------------------------------------------------------------------------------------------|-----------------------------------------------------------------------------------------------------------------------------------|------------------------------------------------------------------------------------------------------------------------------------------------------------------------------------------------------------------------------------------------------------------------------------------------------------------|
|           |                                                |                                                                                                                                                                                                                                              |                                                                                                                                                                                                                                     | tDNA-MI:<br>3mth: 51/58;<br>6mth: 51/58;<br>9mth: 51/58;<br>12mth: 51/58.                                                                                                |                                                                                                                                   |                                                                                                                                                                                                                                                                                                                  |
| <b>40</b> | <b>Cheskin 2008</b>                            | LOW                                                                                                                                                                                                                                          | UNCLEAR                                                                                                                                                                                                                             | LOW                                                                                                                                                                      | HIGH                                                                                                                              |                                                                                                                                                                                                                                                                                                                  |
|           | Assessment justification:                      | Random-number generator.                                                                                                                                                                                                                     | Allocation revealed when the participants were assigned to a group by the study coordinator (after randomisation)                                                                                                                   | Weight objectively measured.                                                                                                                                             | At 34-weeks:<br>standard diet 17/58<br>PCD 31/54<br><br>At 86-weeks:<br>Standard diet 8/58<br>PCD 16/54                           |                                                                                                                                                                                                                                                                                                                  |
| <b>41</b> | <b>Cheyette 2007</b>                           | UNCLEAR                                                                                                                                                                                                                                      | UNCLEAR                                                                                                                                                                                                                             | LOW                                                                                                                                                                      | LOW                                                                                                                               |                                                                                                                                                                                                                                                                                                                  |
|           | Assessment justification:                      | "Non probability volunteer sampling was used to assign people to either the intervention or the control group."                                                                                                                              | NS                                                                                                                                                                                                                                  | Weight objectively measured.                                                                                                                                             | " At six and 12 months follow up a total of eight people dropped out from the intervention group and two from the control group." |                                                                                                                                                                                                                                                                                                                  |
| <b>42</b> | <b>Christensen 2012</b>                        | LOW                                                                                                                                                                                                                                          | LOW                                                                                                                                                                                                                                 | LOW                                                                                                                                                                      | LOW                                                                                                                               | LOW                                                                                                                                                                                                                                                                                                              |
|           | Assessment justification:                      | Cluster-randomization procedure. A cluster formation of the groups was performed to assure equal allocation in the intervention and reference groups balanced on sex, age, job seniority or job type with cluster size varying from 3 to 15. | The randomization was done by an external research group, which had no knowledge of the work place or the participants. Clusters were randomly allocated to intervention and control by the drawing of sealed envelopes from a bag. | The test manager was blinded regarding the participants intervention status, and whenever possible the same test manager tested the subject at all three rounds of tests | 98 participants --> 83 participants.                                                                                              | Clusters were created based on information from the screening questionnaire and the management of working teams, day and evening/night shifts and close working relations. This approach was chosen to avoid contamination, and to benefit from the social support in work teams, thereby increasing compliance. |
| <b>43</b> | <b>Cleo 2018</b>                               | LOW                                                                                                                                                                                                                                          | UNCLEAR                                                                                                                                                                                                                             | LOW                                                                                                                                                                      | LOW                                                                                                                               |                                                                                                                                                                                                                                                                                                                  |

| Study ID  |                           | Random sequence generation<br>(Selection bias)                                                                                                                                                                                                                                                          | Allocation concealment<br>(Selection bias) | Blinding of outcome<br>assessment<br>(Detection bias)                                                                                                                                                                                                                                                                                                          | Incomplete outcome data<br>(Attrition bias)                                                                                                                                                                                                                                                                                                                            | Other bias |
|-----------|---------------------------|---------------------------------------------------------------------------------------------------------------------------------------------------------------------------------------------------------------------------------------------------------------------------------------------------------|--------------------------------------------|----------------------------------------------------------------------------------------------------------------------------------------------------------------------------------------------------------------------------------------------------------------------------------------------------------------------------------------------------------------|------------------------------------------------------------------------------------------------------------------------------------------------------------------------------------------------------------------------------------------------------------------------------------------------------------------------------------------------------------------------|------------|
|           | Assessment justification: | “Computer-generated randomization occurred after baseline assessment to allocate participants to either: TTT, DSD, or WL control (allocation ratio 1:1:1). We used minimization stratified on BMI categories (overweight, obese class I, II, III); age (18–32, 33–47, 48–62, 63–75 years); and gender.” | NS                                         | Weight objectively measured.                                                                                                                                                                                                                                                                                                                                   | At 12-months:<br>21/25 (84%)<br>22/25 (88%)                                                                                                                                                                                                                                                                                                                            |            |
| <b>44</b> | <b>Cole 2013</b>          | LOW                                                                                                                                                                                                                                                                                                     | LOW                                        | LOW                                                                                                                                                                                                                                                                                                                                                            | UNCLEAR                                                                                                                                                                                                                                                                                                                                                                |            |
|           | Assessment justification: | “Randomization occurred by a computer-generated random-numbers list (SPSS version 15.0.1; IBM Corporation) with assignments placed in sealed envelopes, numbered sequentially, and allocated to participants in the order of recruitment.”                                                              | Sealed envelopes used.                     | Weight objectively measured.                                                                                                                                                                                                                                                                                                                                   | “...94 were randomized into the 2 study groups, 80% remained at 3 months, and 69% completed the 1-year assessment (n = 34 SMA, n = 31 control, n = 29 lost to follow-up).”<br><br>“Limitations of the study resulted from a high attrition (31%).”<br><br>Data only given at all points for those who completed year 1 – loss to follow-up from each group is unclear. |            |
| <b>45</b> | <b>Conroy 2015</b>        | UNCLEAR                                                                                                                                                                                                                                                                                                 | LOW                                        | UNCLEAR                                                                                                                                                                                                                                                                                                                                                        | LOW                                                                                                                                                                                                                                                                                                                                                                    |            |
|           | Assessment justification: | “...randomization occurred in a 1:1 allocation. Each woman was allowed to draw a sealed envelope that contained a designation assignment, either interventionist-led (IL) or self-guided (SG).”                                                                                                         | Sealed envelopes.                          | Weight was measured by a trained staff member in clinic using a standard balance beam scale (SECA Medichoice) and following a written protocol. " For the 12-month followup, 62 (74 %) of 84 participating women had an in-person assessment (with study-measured weight), with the remainder of the outcomes assessed by phone." Breakdown by group not clear | “Follow-up was better in the IL group (90 % at 3 months and 96 % at 12 months) than in the SG group (63 % at 3 months and 76 % at 12 months), but otherwise did not differ by other participant characteristics.”                                                                                                                                                      |            |
| <b>46</b> | <b>Cooper 2010</b>        | LOW                                                                                                                                                                                                                                                                                                     | LOW                                        | LOW                                                                                                                                                                                                                                                                                                                                                            | LOW                                                                                                                                                                                                                                                                                                                                                                    |            |

| Study ID  |                           | Random sequence generation<br>(Selection bias)                                                                                                                                                                                                                                                                                                                                                                                                                  | Allocation concealment<br>(Selection bias)                                                                                                                                                    | Blinding of outcome<br>assessment<br>(Detection bias)                                   | Incomplete outcome data<br>(Attrition bias)                                                                                                                                                                                                                                                                                                                                                                                                                                          | Other bias |
|-----------|---------------------------|-----------------------------------------------------------------------------------------------------------------------------------------------------------------------------------------------------------------------------------------------------------------------------------------------------------------------------------------------------------------------------------------------------------------------------------------------------------------|-----------------------------------------------------------------------------------------------------------------------------------------------------------------------------------------------|-----------------------------------------------------------------------------------------|--------------------------------------------------------------------------------------------------------------------------------------------------------------------------------------------------------------------------------------------------------------------------------------------------------------------------------------------------------------------------------------------------------------------------------------------------------------------------------------|------------|
|           | Assessment justification: | “Participants were allocated to the three treatments by HAD (who had no involvement in participant recruitment) using a stratified computer-generated randomization scheme with random permuted blocks of varying size within two strata. Participants were assigned to the two strata on the basis of their binge eating frequency with those reporting 12 or more episodes over the previous 12 weeks being classed as belonging to a binge eating subgroup.” | “The allocation sequence was concealed in numbered sealed opaque envelopes. At the point of randomization, the next envelope in the sequence was opened by one of the two senior clinicians.” | Weight objectively measured.                                                            | At 36-months the following completed assessment:<br>44/51 GSH<br>44/50 BT<br>46/49 CBT                                                                                                                                                                                                                                                                                                                                                                                               |            |
| <b>47</b> | <b>Cousins 1992</b>       | UNCLEAR                                                                                                                                                                                                                                                                                                                                                                                                                                                         | UNCLEAR                                                                                                                                                                                       | LOW                                                                                     | LOW                                                                                                                                                                                                                                                                                                                                                                                                                                                                                  |            |
|           | Assessment justification: | “Subjects were stratified according to weight and randomly assigned to one of the three treatment groups.” No further information given                                                                                                                                                                                                                                                                                                                         | NS                                                                                                                                                                                            | Weight and height measured "using a standard physician's scale."                        | Total at start 168.<br>82 excluded because of missing data.<br>86 completed >50% LOW<br>The remaining 82 subjects were excluded because of missing data at any of the 3-, 6-, and 12-month measurement sessions.<br>Preliminary ANOVA revealed no significant differences on any of the baseline measures, including initial BMI, initial weight, age, acculturation, years of education, or income between the 86 subjects included in these analyses and the 82 who were excluded. |            |
| <b>48</b> | <b>Craighead 1989</b>     | UNCLEAR                                                                                                                                                                                                                                                                                                                                                                                                                                                         | UNCLEAR                                                                                                                                                                                       | LOW                                                                                     | LOW                                                                                                                                                                                                                                                                                                                                                                                                                                                                                  |            |
|           | Assessment justification: | “The subjects who met the qualifications for the study were rank-ordered according to pounds overweight and randomly assigned within blocks of three to one of the experimental conditions. Two groups were formed within each condition depending on subject's availability for meeting times.”                                                                                                                                                                | NS                                                                                                                                                                                            | 'subjects were weighed' at baseline, at each session, at end of 12 weeks and at 1 year. | 62 recruited, 42 at 12 weeks, 38 at 1 year<br>14 dropped out.<br>'The dropout rate was not significantly different among the groups'<br>The treatment analyses were conducted on the 42 subjects who fully participated in the                                                                                                                                                                                                                                                       |            |



| Study ID  | Random sequence generation<br>(Selection bias) | Allocation concealment<br>(Selection bias)                                                                                                                                                                                                                                                | Blinding of outcome<br>assessment<br>(Detection bias)                                                                                                                                                                                                                                                                         | Incomplete outcome data<br>(Attrition bias)                                                                                                                                                                        | Other bias                                                                                                                                                                                                                   |                                                                                                                                                                                                            |
|-----------|------------------------------------------------|-------------------------------------------------------------------------------------------------------------------------------------------------------------------------------------------------------------------------------------------------------------------------------------------|-------------------------------------------------------------------------------------------------------------------------------------------------------------------------------------------------------------------------------------------------------------------------------------------------------------------------------|--------------------------------------------------------------------------------------------------------------------------------------------------------------------------------------------------------------------|------------------------------------------------------------------------------------------------------------------------------------------------------------------------------------------------------------------------------|------------------------------------------------------------------------------------------------------------------------------------------------------------------------------------------------------------|
|           |                                                |                                                                                                                                                                                                                                                                                           |                                                                                                                                                                                                                                                                                                                               | treatment condition to which they had been assigned.                                                                                                                                                               |                                                                                                                                                                                                                              |                                                                                                                                                                                                            |
| <b>49</b> | <b>Crowley 2017</b>                            | LOW                                                                                                                                                                                                                                                                                       | LOW                                                                                                                                                                                                                                                                                                                           | LOW                                                                                                                                                                                                                | HIGH                                                                                                                                                                                                                         |                                                                                                                                                                                                            |
|           | Assessment justification:                      | “Eligible participants were randomized using a computerized random number generator in blocks of 2 (study personnel other than statisticians blinded to block size) within strata defined by baseline HbA1c level (7.5%-8.9% vs ≥9%) and insulin use (multiple types vs 1 type or none).” | After a patient’s screening information has been reviewed and found to meet eligibility criteria, the study coordinator will access a computer program in which to enter the values of the stratification variables; in turn, the computer program will provide the participant’s randomly assigned study arm: WM/SMA or SMA. | Body weight was measured at every visit using a standardized digital scale.                                                                                                                                        | 222/263 at 16-weeks; 198/263 at 32-weeks; 209/263 at 48-weeks<br><br>GMV:<br>117/136 at 48-weeks.<br>WM:<br>109/127 at 48-weeks                                                                                              | Baseline data for Systolic BP, total cholesterol and HDL-C is identical for both study groups. Emailed author to query whether these measures were taken before groups were randomised as this is unclear. |
| <b>50</b> | <b>Dale 2009</b>                               | UNCLEAR                                                                                                                                                                                                                                                                                   | UNCLEAR                                                                                                                                                                                                                                                                                                                       | LOW                                                                                                                                                                                                                | LOW                                                                                                                                                                                                                          |                                                                                                                                                                                                            |
|           | Assessment justification:                      | NS                                                                                                                                                                                                                                                                                        | NS                                                                                                                                                                                                                                                                                                                            | Weight objectively measured.<br><br>“At the time of the euglycemic insulin clamp study, fasting blood samples were taken for lipid measurements, and anthropometry and blood pressure measurements were repeated.” | 87% followed up at 12 months (87% MI, 92% II, 87% control). Reasons for attrition not reported. Reviewers assumed equal loss to follow-up between intervention arms.                                                         |                                                                                                                                                                                                            |
| <b>51</b> | <b>Dalziel 2006</b>                            | UNCLEAR                                                                                                                                                                                                                                                                                   | UNCLEAR                                                                                                                                                                                                                                                                                                                       | UNCLEAR                                                                                                                                                                                                            | LOW                                                                                                                                                                                                                          | HIGH                                                                                                                                                                                                       |
|           | Assessment justification:                      | NS                                                                                                                                                                                                                                                                                        | NS                                                                                                                                                                                                                                                                                                                            | NS                                                                                                                                                                                                                 | "Shortly after randomisation, 21 (8 in the controls and 13 in the experimental group refused follow-up) (table 1)." The mean rate of withdrawal from follow-up was similar in the experimental (8%) and control (7%) groups. | Did not explicitly aim for weight loss so may introduce clinical heterogeneity into the review. Included after discussion as dietary intervention versus control.                                          |

| Study ID |                           | Random sequence generation<br>(Selection bias)                                                                                                                                                                                                                     | Allocation concealment<br>(Selection bias)                                                                                                                                                                          | Blinding of outcome<br>assessment<br>(Detection bias)                                                                                                                                                                                                                                                                                                                                                                             | Incomplete outcome data<br>(Attrition bias)                                                                                                                                                                                                                                                                                                                       | Other bias |
|----------|---------------------------|--------------------------------------------------------------------------------------------------------------------------------------------------------------------------------------------------------------------------------------------------------------------|---------------------------------------------------------------------------------------------------------------------------------------------------------------------------------------------------------------------|-----------------------------------------------------------------------------------------------------------------------------------------------------------------------------------------------------------------------------------------------------------------------------------------------------------------------------------------------------------------------------------------------------------------------------------|-------------------------------------------------------------------------------------------------------------------------------------------------------------------------------------------------------------------------------------------------------------------------------------------------------------------------------------------------------------------|------------|
| 52       | Damschroder 2014          | LOW                                                                                                                                                                                                                                                                | UNCLEAR                                                                                                                                                                                                             | LOW                                                                                                                                                                                                                                                                                                                                                                                                                               | LOW                                                                                                                                                                                                                                                                                                                                                               |            |
|          | Assessment justification: | "...a biostatistician provided block randomized assignments (by medical center and two BMI categories [o35 or Z35] to ensure balance between groups) using random permuted blocks constructed by Stata's <i>ralloc</i> command; block sizes ranged from 3 to 9..." | "Investigators were blind to assignments until baseline assessments were complete."                                                                                                                                 | Anthropometric measures (height, weight, and waist circumference); blood pressure; and self-reported measures including a Food Frequency Questionnaire; EuroQoL-5D utility assessment (with level of painsubscale); Satisfaction with Life Scale; demographic characteristics; laboratory testing for cholesterol and glucose metabolism; and a 6-minute walk test were collected in baseline, 3-month, and 12-month assessments. | Move:<br>3mth: 115/159;<br>12mth: 119/159<br>Aspire phone:<br>3mth: 131/162;<br>12mth: 120/162<br>Aspire group:<br>3mth: 127/160;<br>12mth: 122/160;<br>Follow up 332/481 consented to long term follow up.<br>Move:<br>18mth: 92/112;<br>24mth: 90/112<br>Aspire phone:<br>18mth: 95/105;<br>24mth: 92/105<br>Aspire group:<br>18mth: 102/115;<br>24mth: 104/115 |            |
| 53       | Daubenmier 2016           | LOW                                                                                                                                                                                                                                                                | LOW                                                                                                                                                                                                                 | LOW                                                                                                                                                                                                                                                                                                                                                                                                                               | LOW                                                                                                                                                                                                                                                                                                                                                               |            |
|          | Assessment justification: | "A computer-generated random allocation sequence using random block sizes of four to eight was programmed by a database manager not involved in enrollment."                                                                                                       | "No other staff had access to the randomization sequence. The project director (PM) accessed the allocation sequence using a programmed database that could not be altered once randomized condition was revealed." | "Weight was measured to the nearest 0.1 kg on a calibrated digital scale (Wheelchair Scale 6002, Scale-Tronix, Carol Stream IL), with participants wearing a hospital gown. The same scale was used for measurements throughout the study."                                                                                                                                                                                       | At 18-months follow-up 81% of participants from the mindfulness group and 71% from the control group were followed up.                                                                                                                                                                                                                                            |            |
| 54       | Daumit 2013               | UNCLEAR                                                                                                                                                                                                                                                            | UNCLEAR                                                                                                                                                                                                             | LOW                                                                                                                                                                                                                                                                                                                                                                                                                               | LOW                                                                                                                                                                                                                                                                                                                                                               |            |
|          | Assessment justification: | "Randomization was stratified according to sex and study site; assignments were generated in blocks of two and four." No further detail given                                                                                                                      | NS                                                                                                                                                                                                                  | Weight objectively measured. Measurements of blood pressure, waist circumference, and fasting blood chemical levels were obtained at baseline and at 6 and 18 months.                                                                                                                                                                                                                                                             | Control: 142/147<br>Intervention: 137/144                                                                                                                                                                                                                                                                                                                         |            |
| 55       | de Zwaan 2017             | UNCLEAR                                                                                                                                                                                                                                                            | LOW                                                                                                                                                                                                                 | LOW                                                                                                                                                                                                                                                                                                                                                                                                                               | LOW                                                                                                                                                                                                                                                                                                                                                               |            |

| Study ID  |                           | Random sequence generation<br>(Selection bias)                                                                                                                             | Allocation concealment<br>(Selection bias)                                                                                                                                                                                                                                                           | Blinding of outcome<br>assessment<br>(Detection bias)                                                                                                                                                                                                                                                                                                                                    | Incomplete outcome data<br>(Attrition bias)                                                                                                                                                                                                                                                                                 | Other bias |
|-----------|---------------------------|----------------------------------------------------------------------------------------------------------------------------------------------------------------------------|------------------------------------------------------------------------------------------------------------------------------------------------------------------------------------------------------------------------------------------------------------------------------------------------------|------------------------------------------------------------------------------------------------------------------------------------------------------------------------------------------------------------------------------------------------------------------------------------------------------------------------------------------------------------------------------------------|-----------------------------------------------------------------------------------------------------------------------------------------------------------------------------------------------------------------------------------------------------------------------------------------------------------------------------|------------|
|           | Assessment justification: | “Individuals who met the respective inclusion criteria and who gave their written informed consent to participate were randomized. There were no stratification criteria.” | “To ensure the concealment of allocation, randomization was performed centrally by fax by the Coordination Center for Clinical Trials (KKS) in Marburg. Eligibility assessment, obtaining informed consents, and enrolling the participants in the study were done at the respective study centers.” | Treatment and assessment were separated. Therapists and coaches are not involved in assessing treatment outcome, and assessors are not allowed to hold treatment sessions or write e-mails. The statistician who will conduct the statistical analyses was not involved in randomization. Treatment allocation is not disclosed to the statistician until all data checks are completed. | Treatment attrition and study dropout during treatment were low.<br><br>At intervention end: GSH-I: 77/89*100 = 86.5%;<br>CBT: 85/89*100 =95.5%<br><br>6-month follow-up after intervention end: GSH-I: 70/89*100 = 79%;<br>CBT: 80/89*100 =89.9%<br><br>12-month follow-up: GSH-I: 58/89*100 = 65%;<br>CBT: 58/89*100 =65% |            |
| <b>56</b> | <b>Delahanty 2015</b>     | UNCLEAR                                                                                                                                                                    | UNCLEAR                                                                                                                                                                                                                                                                                              | HIGH                                                                                                                                                                                                                                                                                                                                                                                     | LOW                                                                                                                                                                                                                                                                                                                         |            |
|           | Assessment justification: | NS                                                                                                                                                                         | NS                                                                                                                                                                                                                                                                                                   | "Participants' height and weight were measured twice and averaged on a stadiometer (baseline only) and digital scale, respectively."<br><br>"To evaluate sustainability of weight loss, clinically obtained weights were abstracted from medical records, if available, 1 year after randomization date with a 10- to 14-month window."                                                  | "95% retention at 6 months." At 12 months, 2 GLI and 5 MNT participants had missing clinical data.                                                                                                                                                                                                                          |            |
| <b>57</b> | <b>deRoos 2017</b>        | LOW                                                                                                                                                                        | UNCLEAR                                                                                                                                                                                                                                                                                              | HIGH                                                                                                                                                                                                                                                                                                                                                                                     | LOW                                                                                                                                                                                                                                                                                                                         |            |
|           | Assessment justification: | “After baseline measurements, women were stratified for municipality randomized by computer.”                                                                              | NS                                                                                                                                                                                                                                                                                                   | “At baseline and end of study body weight was measured using an identical balance scale, but at follow-up, body weight was self-reported by the participants.”                                                                                                                                                                                                                           | Anthropometrics:<br>At 16-weeks:<br>control 45/48;<br>diet 94/97;<br>exercise 93/98<br><br>At 12-months:<br>control: NS;                                                                                                                                                                                                    |            |

| Study ID  | Random sequence generation<br>(Selection bias) | Allocation concealment<br>(Selection bias)                                                                                                                                  | Blinding of outcome<br>assessment<br>(Detection bias)                                                                                         | Incomplete outcome data<br>(Attrition bias)                                                                                                                                                                                                   | Other bias                                                                                                                                                                                                                                          |                                                                                                                                                                                                                                                                                                                                                                                                                                                                                                                                                                                                                        |
|-----------|------------------------------------------------|-----------------------------------------------------------------------------------------------------------------------------------------------------------------------------|-----------------------------------------------------------------------------------------------------------------------------------------------|-----------------------------------------------------------------------------------------------------------------------------------------------------------------------------------------------------------------------------------------------|-----------------------------------------------------------------------------------------------------------------------------------------------------------------------------------------------------------------------------------------------------|------------------------------------------------------------------------------------------------------------------------------------------------------------------------------------------------------------------------------------------------------------------------------------------------------------------------------------------------------------------------------------------------------------------------------------------------------------------------------------------------------------------------------------------------------------------------------------------------------------------------|
|           |                                                |                                                                                                                                                                             |                                                                                                                                               | diet: 78/97;<br>exercise: 77/98.                                                                                                                                                                                                              |                                                                                                                                                                                                                                                     |                                                                                                                                                                                                                                                                                                                                                                                                                                                                                                                                                                                                                        |
| <b>58</b> | <b>deVos 2016</b>                              | UNCLEAR                                                                                                                                                                     | LOW                                                                                                                                           | LOW                                                                                                                                                                                                                                           | LOW                                                                                                                                                                                                                                                 |                                                                                                                                                                                                                                                                                                                                                                                                                                                                                                                                                                                                                        |
|           | Assessment justification:                      | "...subjects were randomized using consecutive case numbers. For the diet-and exercise program, subjects were randomized 1:1 using block randomization with block size 20." | "A research assistant not involved in the trial provided a sealed envelope that was opened by the subject in the presence of the researcher." | "For the first 2.5 y, all participants were home-visited every 6 mo by a research assistant..." "Body weight was also measured during these visits." "After 6.6 y, participants were visited once more for measurements and a questionnaire." | After 2.5 y, 10.1% of the participants were lost to follow-up. After 6.6 y, 247 participants (60.7%) agreed to additional measurements and questions. "No significant difference in attrition rate was found between the randomly assigned groups." | Original study design included 4 groups ((1) Lifestyle intervention plus placebo; (2) Lifestyle intervention plus Glucosamine; (3) Control plus placebo; (4) Control plus Glucosamine) which were combined into two groups. "The preventive effects of a weight-loss program and of oral glucosamine sulfate compared with placebo on the incidence of knee osteoarthritis were investigated in a 2x2 factorial design with a follow-up time of 6.6 y." No effects of glucosamine on these outcomes were expected or detected. Therefore, the glucosamine intervention will be disregarded in the present manuscript." |
| <b>59</b> | <b>DeZwaan 2005</b>                            | UNCLEAR                                                                                                                                                                     | UNCLEAR                                                                                                                                       | HIGH                                                                                                                                                                                                                                          | UNCLEAR                                                                                                                                                                                                                                             |                                                                                                                                                                                                                                                                                                                                                                                                                                                                                                                                                                                                                        |
|           | Assessment justification:                      | NS                                                                                                                                                                          | NS                                                                                                                                            | "Follow-up data were obtained during an office visit whenever possible, by mail, or by telephone." "Thirty-nine were interviewed in person and their weight was measured in the office, whereas 21 were                                       | " Six-month follow-up results were available for 60 participants (84.5%)."<br>At the 1-year follow-up, questionnaire data were available for 40-42 (56.3 %-59.1%), weight data for 62                                                               |                                                                                                                                                                                                                                                                                                                                                                                                                                                                                                                                                                                                                        |

| Study ID  | Random sequence generation<br>(Selection bias)                                                                                                                                                                                                                                                                                                                                                       | Allocation concealment<br>(Selection bias)                                                                                                                    | Blinding of outcome<br>assessment<br>(Detection bias)                                                                                                                                    | Incomplete outcome data<br>(Attrition bias)                                                                                                                                                                                                                                                                                                                                                                                                                                                                                                                                                                                                                             | Other bias                                                                                                                              |
|-----------|------------------------------------------------------------------------------------------------------------------------------------------------------------------------------------------------------------------------------------------------------------------------------------------------------------------------------------------------------------------------------------------------------|---------------------------------------------------------------------------------------------------------------------------------------------------------------|------------------------------------------------------------------------------------------------------------------------------------------------------------------------------------------|-------------------------------------------------------------------------------------------------------------------------------------------------------------------------------------------------------------------------------------------------------------------------------------------------------------------------------------------------------------------------------------------------------------------------------------------------------------------------------------------------------------------------------------------------------------------------------------------------------------------------------------------------------------------------|-----------------------------------------------------------------------------------------------------------------------------------------|
|           |                                                                                                                                                                                                                                                                                                                                                                                                      |                                                                                                                                                               | interviewed by phone and self-reported their current weight."                                                                                                                            | (87.3%), and SCID data for 64 (90%) participants.                                                                                                                                                                                                                                                                                                                                                                                                                                                                                                                                                                                                                       |                                                                                                                                         |
| <b>60</b> | <b>Diabetes Prevention Program R G 2009</b>                                                                                                                                                                                                                                                                                                                                                          | LOW                                                                                                                                                           | LOW                                                                                                                                                                                      | LOW                                                                                                                                                                                                                                                                                                                                                                                                                                                                                                                                                                                                                                                                     | HIGH                                                                                                                                    |
|           | Assessment justification:<br>"The randomization was done centrally by computer..."<br>Random treatment assignments were stratified according to clinical center and were generated by the coordinating center through computer linkup to the field center at time of randomization. Therefore, assignment was unknown until randomization. Assignments to metformin and placebo were double-blinded. | "...assignments to the lifestyle group were blinded until randomization, while assignments to the medication groups were blinded until the end of the study." | Lifestyle intervention participants were weighed privately at the start of every individual session and were encouraged to weigh themselves at home daily or a minimum of once per week. | Placebo<br>yr. 1 - 1027/1082;<br>yr. 2 - 1015/1082;<br>yr. 3 - 975/1082.<br>Bridge period DPPOS - 1085 eligible, 935 enrolled. DPPOS<br>yr. 1 882/935;<br>yr. 2 874/935;<br>yr. 3 844/935;<br>yr. 4 - 827/935;<br>yr. 5 - 846/935;<br>yr. 6 808/935;<br>yr. 7 - 789/935;<br>yr. 8 766/935;<br>yr 9. 760/935;<br>yr. 10 - 763/935;<br>yr. 11- 769/935.<br>Lifestyle<br>yr. 1 - 1026/1079;<br>yr. 2 - 1001/1079;<br>yr. 3 - 972/1079.<br>Bridge period DPPOS - 1068 eligible, 914 enrolled. DPPOS<br>yr. 1 855/914;<br>yr. 2 827/914;<br>yr. 3 816/914;<br>yr. 4 - 810/914;<br>yr. 5 - 824/914;<br>yr. 6 783/914;<br>yr. 7 - 763/914;<br>yr. 8 757/914;<br>yr. 9 738/914; | 0-3 years LOW<br>From year 4 HIGH<br>DPP was a 3-year randomized clinical trial followed by open-label modified intervention follow-up. |

| Study ID  | Random sequence generation<br>(Selection bias) | Allocation concealment<br>(Selection bias)                                                                                                                                                                                                                                                                                                                                                                                                                                                 | Blinding of outcome<br>assessment<br>(Detection bias)                                                                                                                     | Incomplete outcome data<br>(Attrition bias)                                                                                                                                                                                                                                                        | Other bias                                                                                                                             |                                                                                                                                                                                                                            |
|-----------|------------------------------------------------|--------------------------------------------------------------------------------------------------------------------------------------------------------------------------------------------------------------------------------------------------------------------------------------------------------------------------------------------------------------------------------------------------------------------------------------------------------------------------------------------|---------------------------------------------------------------------------------------------------------------------------------------------------------------------------|----------------------------------------------------------------------------------------------------------------------------------------------------------------------------------------------------------------------------------------------------------------------------------------------------|----------------------------------------------------------------------------------------------------------------------------------------|----------------------------------------------------------------------------------------------------------------------------------------------------------------------------------------------------------------------------|
|           |                                                |                                                                                                                                                                                                                                                                                                                                                                                                                                                                                            |                                                                                                                                                                           | yr. 10 - 725/914;<br>yr. 11.- 738/914.                                                                                                                                                                                                                                                             |                                                                                                                                        |                                                                                                                                                                                                                            |
| <b>61</b> | <b>Djuric 2002</b>                             | UNCLEAR                                                                                                                                                                                                                                                                                                                                                                                                                                                                                    | UNCLEAR                                                                                                                                                                   | HIGH                                                                                                                                                                                                                                                                                               | LOW                                                                                                                                    | HIGH                                                                                                                                                                                                                       |
|           | Assessment justification:                      | 48 patients were randomly assigned into four research groups by random block design. At baseline: "There were no differences among the four groups in body weight and BMI. Nevertheless, there were significant differences in percentage body fat, total cholesterol, and LDL-C at baseline, indicating that the block randomization process did not equalize all parameters among groups. However, the highest values of these parameters were not consistently found in any one group." | NS                                                                                                                                                                        | 'Weighed in clothing but without shoes using a professional beam scale (model 402KLS; Health-o-Meter, Bridgeview, IL), and percentage of body fat was measured using tetrapolar bioelectrical impedance (model BIA101S; RJL Systems, Clinton Township, MI). Height was measured at baseline only.' | 18.75% dropped out by end of study.<br><br>At 12-months:<br>Control: 12/13<br>WW: 8/11<br>Individualised: 9/13<br>Comprehensive: 10/11 | Missing outcome data - study states intention to follow up to 30 months but 30-month data not available. Data for 3 and 6 months extracted from graphs but some inconsistency between graphs and what is reported in text. |
| <b>62</b> | <b>Donnelly 2013</b>                           | LOW                                                                                                                                                                                                                                                                                                                                                                                                                                                                                        | LOW                                                                                                                                                                       | LOW                                                                                                                                                                                                                                                                                                | LOW                                                                                                                                    |                                                                                                                                                                                                                            |
|           | Assessment justification:                      | "Participants were randomized to FTF clinic or phone at a 1:1 ratio by the study statistician (MSM)."<br><br>"The randomization sequence was generated by an independent statistician and then sent to the project coordinator and concealed until intervention groups were assigned. Randomization was stratified by gender using random permuted blocks of size 4 for each strata with a total of 395 participants."                                                                     | "The randomization sequence was generated by an independent statistician and then sent to the project coordinator and concealed until intervention groups were assigned." | Weight objectively measured.                                                                                                                                                                                                                                                                       | At 6-months:<br>Phone: 84%<br>Face to face: 86%<br><br>At 18-months:<br>Phone: 72%<br>Face to face: 74%                                |                                                                                                                                                                                                                            |
| <b>63</b> | <b>Duncan 2016</b>                             | LOW                                                                                                                                                                                                                                                                                                                                                                                                                                                                                        | LOW                                                                                                                                                                       | LOW                                                                                                                                                                                                                                                                                                | HIGH                                                                                                                                   |                                                                                                                                                                                                                            |

| Study ID  |                           | Random sequence generation<br>(Selection bias)                                                                                                                                                                                                                                                                                                                                                                                                                                                                                                                                                      | Allocation concealment<br>(Selection bias)                                                                                                                                                         | Blinding of outcome<br>assessment<br>(Detection bias)                                                                                                                                                                                                                | Incomplete outcome data<br>(Attrition bias)                                                                                                                                                                                                                                                                                                                                                                              | Other bias                                                                                                                                                                                                              |
|-----------|---------------------------|-----------------------------------------------------------------------------------------------------------------------------------------------------------------------------------------------------------------------------------------------------------------------------------------------------------------------------------------------------------------------------------------------------------------------------------------------------------------------------------------------------------------------------------------------------------------------------------------------------|----------------------------------------------------------------------------------------------------------------------------------------------------------------------------------------------------|----------------------------------------------------------------------------------------------------------------------------------------------------------------------------------------------------------------------------------------------------------------------|--------------------------------------------------------------------------------------------------------------------------------------------------------------------------------------------------------------------------------------------------------------------------------------------------------------------------------------------------------------------------------------------------------------------------|-------------------------------------------------------------------------------------------------------------------------------------------------------------------------------------------------------------------------|
|           | Assessment justification: | <p>“...participants were randomized into one of two groups using a simple randomization procedure stratified by clinic with a 1:1 allocation ratio.”</p> <p>“...the order of control and intervention envelopes was distributed at each practice using a computer-generated randomization list.”</p> <p>“Participants were randomized within practices such that some within a practice were assigned to treatment and some to control conditions. Participating practices were not used as the unit of randomization to avoid between-practice effects confounding between-group differences.”</p> | <p>“Practice nurses and physicians were blinded to the designation of the envelopes...” (notifying participants of allocation to either control or intervention)</p>                               | Weight objectively measured.                                                                                                                                                                                                                                         | <p>While participant drop-out from baseline to 4 months was 49%, the lack of between-group differences in baseline demographic and health indicators in individuals that dropped out of the study indicates that systematic bias was not introduced.</p> <p>"Of the 320 participants randomly assigned to control and intervention groups, 156 (48.8%) were followed-up at 4 months, with 157 (49.1%) at 12 months."</p> |                                                                                                                                                                                                                         |
| <b>64</b> | <b>Eakin 2014</b>         | LOW                                                                                                                                                                                                                                                                                                                                                                                                                                                                                                                                                                                                 | LOW                                                                                                                                                                                                | LOW                                                                                                                                                                                                                                                                  | LOW                                                                                                                                                                                                                                                                                                                                                                                                                      | LOW                                                                                                                                                                                                                     |
|           | Assessment justification: | <p>"Randomization was by the minimization method (18) using the MINIM program (www.sghms.ac.uk/depts/phs/guide/randser.htm)."</p>                                                                                                                                                                                                                                                                                                                                                                                                                                                                   | <p>"Allocation is performed using the free Minim computer software [48] and conducted by a research assistant with minor involvement in participant recruitment."</p>                              | <p>"Data are collected via objective measurements conducted in participants' homes, telephone interviews, and self-administered questionnaires at baseline, 6-, 18-, and 24- months by research staff and registered nurses blind to participants' study group."</p> | <p>"Attrition at 24 months was nondifferential and modest in both groups, yet ;40% of telephone counseling participants chose to discontinue receiving the intervention by withdrawal from either the intervention or study participation altogether."</p>                                                                                                                                                               | <p>"... even among telephone counseling group participants who did not withdraw, intervention delivery was difficult, with just over half of participants completing at least 75% of scheduled intervention calls."</p> |
| <b>65</b> | <b>Eaton 2016</b>         | LOW                                                                                                                                                                                                                                                                                                                                                                                                                                                                                                                                                                                                 | LOW                                                                                                                                                                                                | LOW                                                                                                                                                                                                                                                                  | LOW                                                                                                                                                                                                                                                                                                                                                                                                                      |                                                                                                                                                                                                                         |
|           | Assessment justification: | <p>“After the baseline visit was completed, participants were block randomized within practice in pairs using a random number generator created by the data manager with SPSS for Windows, version 11.0 (IBM).”</p>                                                                                                                                                                                                                                                                                                                                                                                 | <p>“After completion of the initial lifestyle counseling session, the research assistant gave each participant an envelope that revealed the study arm to which the participant was assigned.”</p> | Height, weight, waist circumference, resting heart rate, and resting blood pressure were measured at each visit.                                                                                                                                                     | <p>Control:<br/>78/106 at 6mths; 75/106 at 12mths; 77/106 at 18mths; 75/106 at 24mths<br/>Enhanced intervention: 88/105 at 6mths; 84/105 at 12mths; 75/105 at 18mths; 73/105 at 24mths</p>                                                                                                                                                                                                                               |                                                                                                                                                                                                                         |
| <b>66</b> | <b>Fahey 2018</b>         | LOW                                                                                                                                                                                                                                                                                                                                                                                                                                                                                                                                                                                                 | LOW                                                                                                                                                                                                | HIGH                                                                                                                                                                                                                                                                 | HIGH                                                                                                                                                                                                                                                                                                                                                                                                                     |                                                                                                                                                                                                                         |

| Study ID  |                            | Random sequence generation<br>(Selection bias)                                                                                                                                                                                                                                                                                                           | Allocation concealment<br>(Selection bias)              | Blinding of outcome<br>assessment<br>(Detection bias)                                                                                                                                                                                                                                                                                                                                        | Incomplete outcome data<br>(Attrition bias)                                                                                                                                                                                                                                                                                                                                                                                                                                                                                                                                                                 | Other bias |
|-----------|----------------------------|----------------------------------------------------------------------------------------------------------------------------------------------------------------------------------------------------------------------------------------------------------------------------------------------------------------------------------------------------------|---------------------------------------------------------|----------------------------------------------------------------------------------------------------------------------------------------------------------------------------------------------------------------------------------------------------------------------------------------------------------------------------------------------------------------------------------------------|-------------------------------------------------------------------------------------------------------------------------------------------------------------------------------------------------------------------------------------------------------------------------------------------------------------------------------------------------------------------------------------------------------------------------------------------------------------------------------------------------------------------------------------------------------------------------------------------------------------|------------|
|           | Assessment justification:  | Participants were individually randomly assigned, using a computerized block design (six blocks of four), to one of the two intervention conditions (1:1 allocation) with allocation concealment to ensure balanced assignment to both conditions throughout the study duration.                                                                         | Refer to 'Random sequence generation (selection bias)'. | All measures were obtained by unblinded data collectors at baseline, 4 months, and 12 months unless otherwise indicated.                                                                                                                                                                                                                                                                     | We had originally planned to recruit 204 participants; however, because of greater than expected attrition, we increased the sample size to 248 in order to retain power to detect our planned effect.<br>To avoid introducing bias associated with attrition because of failure to lose weight, missing weight values were imputed conservatively using baseline observation carried forward.<br><br>Retention rate n (%):<br>4-months:<br>CI: $109/124 \times 100 = 87.9\%$ ;<br>SP: $90/124 \times 100 = 72.6\%$<br>12-months:<br>CI: $95/124 \times 100 = 76.6\%$ ;<br>SP: $77/124 \times 100 = 62.1\%$ |            |
| <b>67</b> | <b>Fernandez-Ruiz 2018</b> | UNCLEAR                                                                                                                                                                                                                                                                                                                                                  | UNCLEAR                                                 | LOW                                                                                                                                                                                                                                                                                                                                                                                          | LOW                                                                                                                                                                                                                                                                                                                                                                                                                                                                                                                                                                                                         |            |
|           | Assessment justification:  | Randomisation was performed using a simple table of numbers: 37 patients in the control group and 37 in the experimental group.<br>"A random allocation sequence was generated by a member of the scientific staff through extraction of successive numbered balls from an opaque container, alternating between the experimental and the control group" | Refer to 'Random sequence generation (selection bias)'. | "The efficacy of the intervention was evaluated through anthropometric (body mass index, weight, different parameters, and skinfolds, as stated in Section 2) and cardiovascular measures taken before, during, and after intervention.'<br>'Anthropometric and cardiovascular measures were taken at the pretest stage, every 6 months during the programme, and 1 year after it finished." | No loss to follow up reported.                                                                                                                                                                                                                                                                                                                                                                                                                                                                                                                                                                              |            |
| <b>68</b> | <b>Finkelstein 2017</b>    | LOW                                                                                                                                                                                                                                                                                                                                                      | LOW                                                     | LOW                                                                                                                                                                                                                                                                                                                                                                                          | LOW                                                                                                                                                                                                                                                                                                                                                                                                                                                                                                                                                                                                         |            |



| Study ID  |                           | Random sequence generation<br>(Selection bias)                                                                                                                                                                                                                                                                                                                                                                                                                                                   | Allocation concealment<br>(Selection bias)                                                                                                                                                                                                                                                                                                        | Blinding of outcome<br>assessment<br>(Detection bias)                                                                                                                                                   | Incomplete outcome data<br>(Attrition bias)                                                                                                                                                                                                                                                                                                                                                                                    | Other bias                                                                                                                                                                                                                                                                                                                                                                                                                                                                                                                                                                                                                                                                                                                         |
|-----------|---------------------------|--------------------------------------------------------------------------------------------------------------------------------------------------------------------------------------------------------------------------------------------------------------------------------------------------------------------------------------------------------------------------------------------------------------------------------------------------------------------------------------------------|---------------------------------------------------------------------------------------------------------------------------------------------------------------------------------------------------------------------------------------------------------------------------------------------------------------------------------------------------|---------------------------------------------------------------------------------------------------------------------------------------------------------------------------------------------------------|--------------------------------------------------------------------------------------------------------------------------------------------------------------------------------------------------------------------------------------------------------------------------------------------------------------------------------------------------------------------------------------------------------------------------------|------------------------------------------------------------------------------------------------------------------------------------------------------------------------------------------------------------------------------------------------------------------------------------------------------------------------------------------------------------------------------------------------------------------------------------------------------------------------------------------------------------------------------------------------------------------------------------------------------------------------------------------------------------------------------------------------------------------------------------|
|           | Assessment justification: | “...a computer generated assignment schedule prepared by the statistician. Participants were randomized in a ratio of 1:2 (control: reward) using a block size of 6, with stratification based on gender, ethnicity (Chinese, Non-Chinese), and BMI (<32.5 kg/m <sup>2</sup> , 32.5 kg/m <sup>2</sup> ). Randomization was stratified by BMI to ensure that differences between treatment arms could not potentially be driven by differences in proportion of very high vs. moderate/high BMI.” | “Randomization envelopes containing a slip of paper indicating the study arm were prepared by research staff not involved in random allocation. The envelopes were arranged in sequential order for each stratum, and the top-most envelope was picked by the study coordinator based on the specific stratum to which the participant belonged.” | Weight measured objectively.                                                                                                                                                                            | A total of 123 (76.4%) participants completed the month 12 assessment. 13 participants were lost to follow up at month 4; 5 (9.3%) in the control arm and 8 (7.5%) in the reward arm. At month 8, 35 participants were lost to follow-up; 16 (29.6%) in the control arm and 19 (17.8%) in the reward arm. At month 12, 38 participants were lost to follow-up; 17 (31.5%) in the control arm and 21 (19.6%) in the reward arm. |                                                                                                                                                                                                                                                                                                                                                                                                                                                                                                                                                                                                                                                                                                                                    |
| <b>69</b> | <b>Fisher 2011</b>        | UNCLEAR                                                                                                                                                                                                                                                                                                                                                                                                                                                                                          | UNCLEAR                                                                                                                                                                                                                                                                                                                                           | LOW                                                                                                                                                                                                     | UNCLEAR                                                                                                                                                                                                                                                                                                                                                                                                                        | UNCLEAR                                                                                                                                                                                                                                                                                                                                                                                                                                                                                                                                                                                                                                                                                                                            |
|           | Assessment justification: | NS                                                                                                                                                                                                                                                                                                                                                                                                                                                                                               | NS                                                                                                                                                                                                                                                                                                                                                | Weight objectively measured.<br><br>Total and regional body composition, including total fat mass, percent body fat, leg fat mass, and lean body mass were measured by dual-energy X-ray absorptiometry | NS                                                                                                                                                                                                                                                                                                                                                                                                                             | The weight loss programme varied in length based on when weight loss target was achieved. However, weight taken when weight loss target achieved, at approximately 6mths.<br><br>Subjects were evaluated in the overweight state (prior to any intervention). Weight was stabilized for 4 weeks through dietary control. All testing was conducted following the weight stabilization period, and in the follicular phase of the menstrual cycle. During the weight stabilization period, body weights were measured three to five times per week. Fisher et al. Page 2<br>Obesity (Silver Spring). Author manuscript; available in PMC 2011 June 1 NIH-PA Author Manuscript NIH-PA Author Manuscript<br>General Clinical Research |

| Study ID  |                           | Random sequence generation<br>(Selection bias)                                                                                                                                                                                                                                                                                         | Allocation concealment<br>(Selection bias) | Blinding of outcome<br>assessment<br>(Detection bias) | Incomplete outcome data<br>(Attrition bias)    | Other bias                                                                                                         |
|-----------|---------------------------|----------------------------------------------------------------------------------------------------------------------------------------------------------------------------------------------------------------------------------------------------------------------------------------------------------------------------------------|--------------------------------------------|-------------------------------------------------------|------------------------------------------------|--------------------------------------------------------------------------------------------------------------------|
|           |                           |                                                                                                                                                                                                                                                                                                                                        |                                            |                                                       |                                                | Center (GCRC) at UAB. A macronutrient-controlled diet was provided during the final 2 weeks of weight maintenance. |
| <b>70</b> | <b>Foley 2016</b>         | LOW                                                                                                                                                                                                                                                                                                                                    | UNCLEAR                                    | LOW                                                   | LOW                                            |                                                                                                                    |
|           | Assessment justification: | “Randomization occurred at the baseline visit, using a computer-based algorithm. The randomization algorithm allocated participants equally (1:1) across treatment arms, after accounting for CHC, gender and ethnicity (Hispanic vs. non-Hispanic) in order to ensure the equal representation of these characteristics across arms.” | NS                                         | Weight measured objectively.                          | Less than 50% attrition at 12-month follow-up. |                                                                                                                    |
| <b>71</b> | <b>Foreyt 1993</b>        | LOW                                                                                                                                                                                                                                                                                                                                    | UNCLEAR                                    | LOW                                                   | LOW                                            |                                                                                                                    |

| Study ID  |                           | Random sequence generation<br>(Selection bias)                                                                  | Allocation concealment<br>(Selection bias) | Blinding of outcome<br>assessment<br>(Detection bias) | Incomplete outcome data<br>(Attrition bias)                                                                                                                                                                                                                                                                                                                                                                                                                                                                                                                                                                                     | Other bias |
|-----------|---------------------------|-----------------------------------------------------------------------------------------------------------------|--------------------------------------------|-------------------------------------------------------|---------------------------------------------------------------------------------------------------------------------------------------------------------------------------------------------------------------------------------------------------------------------------------------------------------------------------------------------------------------------------------------------------------------------------------------------------------------------------------------------------------------------------------------------------------------------------------------------------------------------------------|------------|
|           | Assessment justification: | Random number table                                                                                             | NS                                         | Weight measured objectively.                          | 86/127 at 12mths (in 3 intervention groups (not control)) LOW<br>61/127 at 2 years HIGH (61/86 that completed to 12mths)<br>In each treatment condition, about one third of subjects dropped out of the study before the one-year assessment; 13 from the diet-only, 13 from the exercise-only, and 15 from the exercise-plus-diet groups. The differential dropout rate across treatment groups was not significant, $z = .34$ , $p = .84$ . At baseline, dropouts were not significantly heavier than those who were available for one-year follow-up, 103.3 kg versus 96.3 kg, respectively, $F(1,121) = 2.49$ , $p = .12$ . |            |
| <b>72</b> | <b>Forman 2013</b>        | LOW                                                                                                             | LOW                                        | LOW                                                   | LOW                                                                                                                                                                                                                                                                                                                                                                                                                                                                                                                                                                                                                             |            |
|           | Assessment justification: | “Participants were assigned to SBT or ABT via computer-based random allocation, with blocking by baseline BMI.” | Computer-based random allocation used.     | Weight objectively measured.                          | SBT 37/54<br>ABT 50/74                                                                                                                                                                                                                                                                                                                                                                                                                                                                                                                                                                                                          |            |
| <b>73</b> | <b>Forman 2016</b>        | UNCLEAR                                                                                                         | UNCLEAR                                    | LOW                                                   | LOW                                                                                                                                                                                                                                                                                                                                                                                                                                                                                                                                                                                                                             |            |

| Study ID |                           | Random sequence generation<br>(Selection bias)                                                                                               | Allocation concealment<br>(Selection bias) | Blinding of outcome<br>assessment<br>(Detection bias) | Incomplete outcome data<br>(Attrition bias)                                                                                                                                                                                                                                                                                                                                                                                                                                                                                                                                                                                                                                                                                                                                                                                                             | Other bias |
|----------|---------------------------|----------------------------------------------------------------------------------------------------------------------------------------------|--------------------------------------------|-------------------------------------------------------|---------------------------------------------------------------------------------------------------------------------------------------------------------------------------------------------------------------------------------------------------------------------------------------------------------------------------------------------------------------------------------------------------------------------------------------------------------------------------------------------------------------------------------------------------------------------------------------------------------------------------------------------------------------------------------------------------------------------------------------------------------------------------------------------------------------------------------------------------------|------------|
|          | Assessment justification: | “Once enrolled, participants were randomly assigned to SBT (n 5 90) or ABT (n 5 100). Randomization was stratified by gender and ethnicity.” | NS                                         | Weight measured objectively.                          | <p>End of treatment: SBT 70/90; ABT 79/100</p> <p>“Treatment attendance (with inclusion of makeup sessions) was in excess of 84% of expected sessions, and there were no differences between the two treatments in terms of the average number of sessions attended (MABT = 21.26 +/- 5.85, MSBT = 20.88 +/- 5.46; t(189) = -0.46, P = 0.65). Overall, 84.2% of the ABT participants and 85.6% of SBT participants attended the majority (i.e., 18 or more) of the 25 scheduled groups (X<sup>2</sup> 5 0.07, df = 1, P = 0.79). A total of 142 participants (74%) completed the mid-treatment assessment and 149 participants (78%) completed the post-treatment assessment.”</p> <p>Retention rate:<br/> 24-month follow-up: SBT: 65/90*100 = 72.2%; ABT: 78/100*100 = 78%<br/> 36-month follow-up: SBT: 61/90*100 = 67.7%; ABT: 74/100*100 = 74%</p> |            |
| 74       | Foster-Schubert 2012      | LOW                                                                                                                                          | LOW                                        | LOW                                                   | LOW                                                                                                                                                                                                                                                                                                                                                                                                                                                                                                                                                                                                                                                                                                                                                                                                                                                     | UNCLEAR    |

| Study ID  | Random sequence generation<br>(Selection bias)                                                                                                                                                                                                                                                                                                                                                                                                                                                                                                                                                                                                                                                   | Allocation concealment<br>(Selection bias)                                                                              | Blinding of outcome<br>assessment<br>(Detection bias)                                                                                                                                                                                                            | Incomplete outcome data<br>(Attrition bias)                                                                                                 | Other bias                                                                   |
|-----------|--------------------------------------------------------------------------------------------------------------------------------------------------------------------------------------------------------------------------------------------------------------------------------------------------------------------------------------------------------------------------------------------------------------------------------------------------------------------------------------------------------------------------------------------------------------------------------------------------------------------------------------------------------------------------------------------------|-------------------------------------------------------------------------------------------------------------------------|------------------------------------------------------------------------------------------------------------------------------------------------------------------------------------------------------------------------------------------------------------------|---------------------------------------------------------------------------------------------------------------------------------------------|------------------------------------------------------------------------------|
|           | Assessment justification:<br>"The random assignment was generated by a computerized program, stratified according to BMI (<30 kg/m <sup>2</sup> or ≥30 kg/m <sup>2</sup> ) and participants' self-reported race/ethnicity (non-Hispanic white, black, or other). In addition, to achieve a proportionally smaller number of women assigned to the control group, a permuted blocks randomization with blocks of four was used, wherein the control assignment was randomly eliminated from each block with a probability of ~1 in 4."<br>Blocked-randomisation. (Permuted-block randomization (ratio 0.75 : 1 : 1 : 1) to assign a proportionally smaller number of women to the control group.) | Central computerised allocation.                                                                                        | Weight measured objectively.                                                                                                                                                                                                                                     | 91% followed up at 12m overall: 92% D+E, 89% D only, 91% E only, 92% usual care. 2 unavoidable losses (<1%); 8% missing; 1% medical reason. | Control group received intervention at 12m, unclear if they knew in advance. |
| <b>75</b> | <b>Freitas 2017</b>                                                                                                                                                                                                                                                                                                                                                                                                                                                                                                                                                                                                                                                                              | LOW                                                                                                                     | LOW                                                                                                                                                                                                                                                              | HIGH                                                                                                                                        | UNCLEAR                                                                      |
|           | Assessment justification:<br>"Randomization schedule was computer-generated and implemented by an investigator blinded to the recruitment, evaluation and treatment of the participants."                                                                                                                                                                                                                                                                                                                                                                                                                                                                                                        | " Each patient's allocation was concealed using sequential numbering and then sealed and placed in opaque envelopes..." | "The nutritionist and psychologist, as well as the outcome assessors, were blinded throughout the duration of the study."<br><br>"The long-term effect (6 and 12 mo after randomization) was evaluated by obtaining body weight from patients' medical records." | No information given on n followed up at 6- and 12-months.                                                                                  |                                                                              |
| <b>76</b> | <b>Fuller 2012</b>                                                                                                                                                                                                                                                                                                                                                                                                                                                                                                                                                                                                                                                                               | UNCLEAR                                                                                                                 | UNCLEAR                                                                                                                                                                                                                                                          | LOW                                                                                                                                         | LOW                                                                          |
|           | Assessment justification:<br>The randomisation process was completed by the study database (Filemaker Pro), upon entry of the participant's initials and fulfilment of trial requirements.                                                                                                                                                                                                                                                                                                                                                                                                                                                                                                       | NS                                                                                                                      | Weight objectively measured.                                                                                                                                                                                                                                     | 22/35 Korean group and 28/35 Western group completed the study.                                                                             |                                                                              |
| <b>77</b> | <b>Gold 2007</b>                                                                                                                                                                                                                                                                                                                                                                                                                                                                                                                                                                                                                                                                                 | UNCLEAR                                                                                                                 | UNCLEAR                                                                                                                                                                                                                                                          | LOW                                                                                                                                         | LOW                                                                          |
|           | NS                                                                                                                                                                                                                                                                                                                                                                                                                                                                                                                                                                                                                                                                                               | NS                                                                                                                      | Weight was objectively measured.                                                                                                                                                                                                                                 | 71% followed up at 12m; 65% intervention, 77% control. 2% unavoidable; 25% missing; 2% medical.                                             |                                                                              |
| <b>78</b> | <b>Goodwin 2014</b>                                                                                                                                                                                                                                                                                                                                                                                                                                                                                                                                                                                                                                                                              | LOW                                                                                                                     | UNCLEAR                                                                                                                                                                                                                                                          | LOW                                                                                                                                         |                                                                              |

| Study ID  | Random sequence generation<br>(Selection bias) | Allocation concealment<br>(Selection bias)                                                                                                                                                                                                                                  | Blinding of outcome<br>assessment<br>(Detection bias)                                                                                                                                                                                                                                   | Incomplete outcome data<br>(Attrition bias)                                          | Other bias                                                                                                                                                                                                                                                                                                                                                                                                                                                                             |
|-----------|------------------------------------------------|-----------------------------------------------------------------------------------------------------------------------------------------------------------------------------------------------------------------------------------------------------------------------------|-----------------------------------------------------------------------------------------------------------------------------------------------------------------------------------------------------------------------------------------------------------------------------------------|--------------------------------------------------------------------------------------|----------------------------------------------------------------------------------------------------------------------------------------------------------------------------------------------------------------------------------------------------------------------------------------------------------------------------------------------------------------------------------------------------------------------------------------------------------------------------------------|
|           | Assessment justification:                      | "Random assignment was performed centrally by the Ontario Clinical Oncology Group, and a computer-generated block randomization scheme with blocks of various size was used."                                                                                               | NS                                                                                                                                                                                                                                                                                      | Weight objectively measured.                                                         | "Six patients in the mail-based intervention and seven in the LI arm did not complete the 24-month intervention period because of a primary outcome event (new disease, metastases, death); of the remaining patients, 14 (8.7%) and 16 (9.9%), respectively, withdrew (including patients who transferred care, those who were lost to follow-up, or those with noncompliance). Month-24 weight measurements were available from 264 (90.1%) of 293 participants still on the study." |
| <b>79</b> | <b>Gorin 2013</b>                              | UNCLEAR                                                                                                                                                                                                                                                                     | UNCLEAR                                                                                                                                                                                                                                                                                 | LOW                                                                                  | LOW                                                                                                                                                                                                                                                                                                                                                                                                                                                                                    |
|           | Assessment justification:                      | "Participants were randomly assigned to one of two 18-month behavioral weight-control programs..."<br>No further information provided.                                                                                                                                      | NS                                                                                                                                                                                                                                                                                      | Weight measured objectively.                                                         | Standard:<br>96/99 at 6mths;<br>86/99 at 18mths<br><br>Enhanced:<br>102/102 at 6mths; 99/102 at 18mths                                                                                                                                                                                                                                                                                                                                                                                 |
| <b>80</b> | <b>Green 2015</b>                              | LOW                                                                                                                                                                                                                                                                         | UNCLEAR                                                                                                                                                                                                                                                                                 | LOW                                                                                  | LOW                                                                                                                                                                                                                                                                                                                                                                                                                                                                                    |
|           | Assessment justification:                      | Minimisation.<br>Participants were assigned to intervention or usual-care using a stratified blocked (on gender and BMI [27–34.9 and ≥35]) randomization procedure, within sites. We used computer and paper-based randomization systems; sequence generated by author NAP. | Staff not involved in data collection informed participants about randomization. Others were blinded to assignment, and participants were routinely reminded not to discuss assignment during assessments. Usual care participants were free to pursue alternative weight-loss efforts. | Blinded staff collected data at all study periods, including scale-measured weights. | Follow-up rates were 90.5% of participants at 6 months (n = 181), 85% at 1 year (n = 170), and 81.5% (n = 164) at 2 years (83.2% if 3 deaths are removed). We found no significant differences in attrition between study arms at any assessment point.                                                                                                                                                                                                                                |
| <b>81</b> | <b>Grilo 2011</b>                              | LOW                                                                                                                                                                                                                                                                         | UNCLEAR                                                                                                                                                                                                                                                                                 | LOW                                                                                  | LOW                                                                                                                                                                                                                                                                                                                                                                                                                                                                                    |

| Study ID  |                           | Random sequence generation<br>(Selection bias)                                                                                                                                                                                                                                                                                                                                          | Allocation concealment<br>(Selection bias)                                                                                                                                                                                                                                                                                                                                              | Blinding of outcome<br>assessment<br>(Detection bias)                                                                                                                                                                                                      | Incomplete outcome data<br>(Attrition bias)                                                                                                                                                                                                                                                                                                                                                                                                                 | Other bias |
|-----------|---------------------------|-----------------------------------------------------------------------------------------------------------------------------------------------------------------------------------------------------------------------------------------------------------------------------------------------------------------------------------------------------------------------------------------|-----------------------------------------------------------------------------------------------------------------------------------------------------------------------------------------------------------------------------------------------------------------------------------------------------------------------------------------------------------------------------------------|------------------------------------------------------------------------------------------------------------------------------------------------------------------------------------------------------------------------------------------------------------|-------------------------------------------------------------------------------------------------------------------------------------------------------------------------------------------------------------------------------------------------------------------------------------------------------------------------------------------------------------------------------------------------------------------------------------------------------------|------------|
|           | Assessment justification: | "Randomization to treatment was performed without any restriction or stratification, using a computer-generated sequence."                                                                                                                                                                                                                                                              | "Randomization was determined after formal acceptance into the study and completion of all assessments. Randomization assignment was kept from participants until the start of treatment."                                                                                                                                                                                              | "Weight and height were measured at baseline and again immediately prior to beginning treatment using a trade-legal medical balance-beam scale. Weight was measured bi-weekly throughout treatment, at post-treatment, and at 6- and 12-month follow-ups." | Retention rate:<br>Post-intervention:<br>CBT: 75.6%;<br>BWL: 68.9%;<br>CBT+BWL: 60.0%<br><br>6-Months:<br>CBT: 82.2%;<br>BWL: 86.7%;<br>CBT+BWL: 85.7%<br><br>12-Months:<br>CBT: 82.2%;<br>BWL: 82.2%;<br>CBT+BWL: 71.4%<br><br>"Completion rates, which did not differ statistically, were: 76% (N=34) for CBT, 69% (N=31) for BWL, and 60% (N=21) for CBT+BWL. Follow-up (6-and 12-month) assessments were obtained for over 80% of patients (Figure 1)." |            |
| <b>82</b> | <b>Grilo 2014</b>         | LOW                                                                                                                                                                                                                                                                                                                                                                                     | LOW                                                                                                                                                                                                                                                                                                                                                                                     | LOW                                                                                                                                                                                                                                                        | LOW                                                                                                                                                                                                                                                                                                                                                                                                                                                         |            |
|           | Assessment justification: | "Randomization to treatment assignment occurred in the exact order following completion of all assessments and medical approval and was performed independently from the investigators by a research-pharmacist at a separate Yale facility using a computer-generated schedule generated by a biostatistician. Participants were randomly assigned with stratification by BED status." | "Randomization to treatment assignment occurred in the exact order following completion of all assessments and medical approval and was performed independently from the investigators by a research-pharmacist at a separate Yale facility using a computer-generated schedule generated by a biostatistician. Participants were randomly assigned with stratification by BED status." | "The assessments were performed independently by doctoral research evaluators at our research clinic who were blinded to both the medication status and to whether participants received the shCBT."                                                       | "Post-treatment assessments were obtained for 84% of patients and follow-up assessments were obtained for 83% of patients at the 6-month follow-up and for 86% of patients at the 12-month follow-up."<br><br>Retention rates:<br>Post-treatment: Placebo:<br>20/27*100=74.1%;<br>Placebo/CBTsh: 22/25*100 = 88%<br><br>6-Months: Placebo:<br>22/27*100=81.4%;                                                                                              |            |

| Study ID  | Random sequence generation<br>(Selection bias)                                                                                                                                                                                                                                                                                                                                                                                                                           | Allocation concealment<br>(Selection bias)                                                                                                                                                                                                                                                                                                                                                                                                                                                                                                                                                                                     | Blinding of outcome<br>assessment<br>(Detection bias)                                                                                                                                                                                                                                                                                                                                                                                                                                                                                                        | Incomplete outcome data<br>(Attrition bias)                                                                                       | Other bias |
|-----------|--------------------------------------------------------------------------------------------------------------------------------------------------------------------------------------------------------------------------------------------------------------------------------------------------------------------------------------------------------------------------------------------------------------------------------------------------------------------------|--------------------------------------------------------------------------------------------------------------------------------------------------------------------------------------------------------------------------------------------------------------------------------------------------------------------------------------------------------------------------------------------------------------------------------------------------------------------------------------------------------------------------------------------------------------------------------------------------------------------------------|--------------------------------------------------------------------------------------------------------------------------------------------------------------------------------------------------------------------------------------------------------------------------------------------------------------------------------------------------------------------------------------------------------------------------------------------------------------------------------------------------------------------------------------------------------------|-----------------------------------------------------------------------------------------------------------------------------------|------------|
|           |                                                                                                                                                                                                                                                                                                                                                                                                                                                                          |                                                                                                                                                                                                                                                                                                                                                                                                                                                                                                                                                                                                                                |                                                                                                                                                                                                                                                                                                                                                                                                                                                                                                                                                              | Placebo/CBTsh: $23/25 * 100 = 92\%$<br><br>12-Months: Placebo:<br>$19/27 * 100 = 70.4\%$ ;<br>Placebo/CBTsh: $21/25 * 100 = 84\%$ |            |
| <b>83</b> | <b>Hageman 2017</b>                                                                                                                                                                                                                                                                                                                                                                                                                                                      | LOW                                                                                                                                                                                                                                                                                                                                                                                                                                                                                                                                                                                                                            | LOW                                                                                                                                                                                                                                                                                                                                                                                                                                                                                                                                                          | LOW                                                                                                                               |            |
|           | Assessment justification:<br><br>"A randomization schedule was created by the project statistician using online software to generate sequences of pseudorandom numbers ( <a href="http://www.randomizer.org/form.htm">http://www.randomizer.org/form.htm</a> ). To keep accrual relatively even during rolling enrollment, a random ordering of block sizes 12, 15, and 18 was used. The project statistician did not have any contact with the women during the trial." | 'At completion of the first baseline visit, nurses delivered a sealed confidential envelope to each woman that contained an identification number and a password for logging into the intervention website and advised women to keep their login information materials confidential.'<br><br>'Upon completion of baseline assessment visit two, each woman received an electronic notice on her intervention web account of her group assignment. The women were instructed to not share this with others, including the research nurses who conducted the assessments, who were blinded to web intervention content as well.' | Hageman 2011: 'The Tanita Model [TBF-215, Tanita Corporation of America, Inc., 2625 S. Clearbrook Dr., Arlington Heights, IL 60005-9824] will be used to measure height, weight and percent body fat following the manufacturer's instructions. Women will be asked to fast within 4 hours of the test, not exercise intensively within 12 hours of the test, avoid alcohol 48 hours before testing and to void the bladder within 30 minutes prior to the test, as this bioelectrical impedance analysis system measure is sensitive to hydration status .' | WO: 76/101<br>WD: 67/100<br>WE: 73/ 100                                                                                           |            |
| <b>84</b> | <b>Hakala 1993</b>                                                                                                                                                                                                                                                                                                                                                                                                                                                       | UNCLEAR                                                                                                                                                                                                                                                                                                                                                                                                                                                                                                                                                                                                                        | UNCLEAR                                                                                                                                                                                                                                                                                                                                                                                                                                                                                                                                                      | LOW                                                                                                                               | LOW        |



| Study ID  |                           | Random sequence generation<br>(Selection bias)                                                                                                                                                                                                                                                                                                                                                                                                                                                                                         | Allocation concealment<br>(Selection bias)        | Blinding of outcome<br>assessment<br>(Detection bias)                                                                                  | Incomplete outcome data<br>(Attrition bias)                                                                                                                                                                                                                                                                                                                              | Other bias |
|-----------|---------------------------|----------------------------------------------------------------------------------------------------------------------------------------------------------------------------------------------------------------------------------------------------------------------------------------------------------------------------------------------------------------------------------------------------------------------------------------------------------------------------------------------------------------------------------------|---------------------------------------------------|----------------------------------------------------------------------------------------------------------------------------------------|--------------------------------------------------------------------------------------------------------------------------------------------------------------------------------------------------------------------------------------------------------------------------------------------------------------------------------------------------------------------------|------------|
|           | Assessment justification: | 'randomly divided'                                                                                                                                                                                                                                                                                                                                                                                                                                                                                                                     | NS                                                | Weight objectively measured.                                                                                                           | Group 28/30 at 2 yrs., 28/30 at 5yrs.<br>Individual 27/28 at 2 yrs., 25/28 at 5yrs.<br><br>'Adherence 97% at 2 yrs., 88% at 5 years'                                                                                                                                                                                                                                     |            |
| <b>85</b> | <b>Hanson 1976</b>        | UNCLEAR                                                                                                                                                                                                                                                                                                                                                                                                                                                                                                                                | UNCLEAR                                           | UNCLEAR                                                                                                                                | HIGH                                                                                                                                                                                                                                                                                                                                                                     |            |
|           | Assessment justification: | NS                                                                                                                                                                                                                                                                                                                                                                                                                                                                                                                                     | NS                                                | NS                                                                                                                                     | Attrition greater than 25% at 5-month follow-up and approximately 50% at 1-year follow-up.                                                                                                                                                                                                                                                                               |            |
| <b>86</b> | <b>Hardcastle 2013</b>    | LOW                                                                                                                                                                                                                                                                                                                                                                                                                                                                                                                                    | UNCLEAR                                           | LOW                                                                                                                                    | LOW                                                                                                                                                                                                                                                                                                                                                                      |            |
|           | Assessment justification: | "A statistician, who had no contact with the participants, was asked to develop a randomisation protocol such that participants were allocated to the MI intervention and minimal intervention groups by a ratio of 7:5. The randomisation protocol was stratified by gender and age based on patient records. The patients within each stratum were divided into blocks of 12 and then randomly allocated to the MI intervention and minimal intervention groups using computer generated random numbers by the predetermined ratio." | NS                                                | "The practice nurse was blind to the treatment allocated to each patient at baseline and subsequent assessments."                      | At 18 months, 41% from the intervention group and 31% of the control group were lost to follow-up.                                                                                                                                                                                                                                                                       |            |
| <b>87</b> | <b>Harrigan 2016</b>      | LOW                                                                                                                                                                                                                                                                                                                                                                                                                                                                                                                                    | LOW                                               | HIGH                                                                                                                                   | HIGH                                                                                                                                                                                                                                                                                                                                                                     |            |
|           | Assessment justification: | "Permuted-block randomization with random block size was performed by the study biostatistician"                                                                                                                                                                                                                                                                                                                                                                                                                                       | "..blinded study staff using unmarked envelopes." | "Height (using a stadiometer) and weight were measured at baseline and 6 months." "... self-reported weight from baseline to 12 month" | Because there were 15 (15%) individuals who were missing body weight measurements at 6 months, multiple imputation with data augmentation under the multivariate normal model was conducted using SAS PROC MI, as described by Allison. <sup>15</sup> The final results were consistent with the results without multiple imputations.<br><br>Completed 12-Months: Usual |            |

| Study ID  | Random sequence generation<br>(Selection bias) | Allocation concealment<br>(Selection bias)                                                                                                                                                                                                                                                                                                                                                                                                                                                                                         | Blinding of outcome<br>assessment<br>(Detection bias)                                                                                                         | Incomplete outcome data<br>(Attrition bias)                                                                                                                                                                                                                             | Other bias                                                                                                                  |
|-----------|------------------------------------------------|------------------------------------------------------------------------------------------------------------------------------------------------------------------------------------------------------------------------------------------------------------------------------------------------------------------------------------------------------------------------------------------------------------------------------------------------------------------------------------------------------------------------------------|---------------------------------------------------------------------------------------------------------------------------------------------------------------|-------------------------------------------------------------------------------------------------------------------------------------------------------------------------------------------------------------------------------------------------------------------------|-----------------------------------------------------------------------------------------------------------------------------|
|           |                                                |                                                                                                                                                                                                                                                                                                                                                                                                                                                                                                                                    |                                                                                                                                                               | care: N = 19 (58%);<br>Telephone: N = 15 (44%);<br>In-Person: N = 22 (67%)                                                                                                                                                                                              |                                                                                                                             |
| <b>88</b> | <b>Harris 2017</b>                             | LOW                                                                                                                                                                                                                                                                                                                                                                                                                                                                                                                                | LOW                                                                                                                                                           | LOW                                                                                                                                                                                                                                                                     |                                                                                                                             |
|           | Assessment justification:                      | "The researcher will telephone an interactive voice response system (IVRS), hosted by the Robertson Centre for Biostatistics, University of Glasgow. The researcher will register each participant in the study, by giving the participants' cluster number, the number of individuals within the cluster, level of intellectual disabilities and presence of Down Syndrome. After registering each participant, the system will notify the principal investigator of the allocation (TAKE 5 intervention or WWToo intervention)." | "After registering each participant, the system will notify the principal investigator of the allocation (TAKE 5 intervention or WWToo intervention)."        | "A researcher (L. H.) who was blind to study group allocation was responsible for collecting all outcome measures, completed at baseline, at 6 and 12 months."<br>"Weight in kg was measured to the nearest 100 g, using SECA877 scales (SE approval class III; SECA)." | WWToo had no lost to follow-up at 12 months; TAKE 5 intervention group had 2 participants lost to follow-up at 12 months.   |
| <b>89</b> | <b>Hunt 2014</b>                               | LOW                                                                                                                                                                                                                                                                                                                                                                                                                                                                                                                                | LOW                                                                                                                                                           | LOW                                                                                                                                                                                                                                                                     | HIGH                                                                                                                        |
|           | Assessment justification:                      | "After baseline measurement, the randomisation sequence was generated by the Tayside Clinical Trials Unit (TCTU) statistician (with no day to day role in the study at this point) with SAS (version 9.2), blocked (block size between two and nine dependent on how many participants were recruited at a club), and stratified by club."                                                                                                                                                                                         | "The allocation sequence was sent in a password protected file to a database manager (not part of the research team) who assigned individuals to each group." | Weight measured objectively.                                                                                                                                                                                                                                            | Comparison (control): 347/374 at 12-weeks; 355/374 at 12-months.<br>Intervention: 330/374 at 12-weeks; 333/374 at 12-months |

| Study ID  |                           | Random sequence generation<br>(Selection bias)                                                                                                                                                   | Allocation concealment<br>(Selection bias)               | Blinding of outcome<br>assessment<br>(Detection bias)                                                                                                                           | Incomplete outcome data<br>(Attrition bias)                                                                             | Other bias |
|-----------|---------------------------|--------------------------------------------------------------------------------------------------------------------------------------------------------------------------------------------------|----------------------------------------------------------|---------------------------------------------------------------------------------------------------------------------------------------------------------------------------------|-------------------------------------------------------------------------------------------------------------------------|------------|
| <b>90</b> | <b>Huseinovic 2016</b>    | LOW                                                                                                                                                                                              | LOW                                                      | LOW                                                                                                                                                                             | LOW                                                                                                                     |            |
|           | Assessment justification: | "...simple randomization procedure that used numbered and sealed envelopes generated through a random number table prepared by the project coordinator."                                         | Refer to 'Random sequence generation (selection bias)'.  | "All study measures and administration of intervention were completed by 2 dietitians at the primary health care clinics. Blinding of the study dietitians was not possible..." | D Group:<br>Baseline n=54;<br>12-wk: n=47;<br>1-year: n=44<br>C Group:<br>Baseline n=56;<br>12-wk n=53;<br>1-year: n=45 |            |
| <b>91</b> | <b>Irwin 2003</b>         | LOW                                                                                                                                                                                              | LOW                                                      | LOW                                                                                                                                                                             | LOW                                                                                                                     |            |
|           | Assessment justification: | "Randomization was performed by random number generation..."<br>"Randomization was stratified by BMI (<27.5 vs >27.5) to ensure equal numbers of heavier and lighter women in each study group." | "...group assignment was placed in a sealed envelope..." | Weight measured objectively.                                                                                                                                                    | Less than 50% attrition at 12-months follow-up.                                                                         |            |
| <b>92</b> | <b>Jackson 1982</b>       | UNCLEAR                                                                                                                                                                                          | UNCLEAR                                                  | LOW                                                                                                                                                                             | UNCLEAR                                                                                                                 |            |
|           | Assessment justification: | NS                                                                                                                                                                                               | NS                                                       | "Both groups were weighed weekly by a teacher and a teacher's assistant to ensure reliability of measurements."                                                                 | Authors do not report that any participants were lost to follow-up.                                                     |            |
| <b>93</b> | <b>Jackson 2018</b>       | LOW                                                                                                                                                                                              | UNCLEAR                                                  | LOW                                                                                                                                                                             | LOW                                                                                                                     |            |
|           | Assessment justification: | "The randomization scheme have been generated by using the Web site Randomization.com (www.randomization.com)."                                                                                  | NS                                                       | " Assessments were conducted by inpatient clinic staff and graduate psychology trainees who were blinded to participant treatment condition assignment."                        | "No data were missing for any of the participants on any of the outcome measures at any of the measurement points."     |            |
| <b>94</b> | <b>Jakicic 2011</b>       | LOW                                                                                                                                                                                              | UNCLEAR                                                  | LOW                                                                                                                                                                             | LOW                                                                                                                     |            |

| Study ID  |                           | Random sequence generation<br>(Selection bias)                                                                                                                                                                                                                                                   | Allocation concealment<br>(Selection bias)                                                      | Blinding of outcome<br>assessment<br>(Detection bias)                                                                                                                                                                                                                                                                                                                  | Incomplete outcome data<br>(Attrition bias)                                                                                                                                                                                                                                                       | Other bias |
|-----------|---------------------------|--------------------------------------------------------------------------------------------------------------------------------------------------------------------------------------------------------------------------------------------------------------------------------------------------|-------------------------------------------------------------------------------------------------|------------------------------------------------------------------------------------------------------------------------------------------------------------------------------------------------------------------------------------------------------------------------------------------------------------------------------------------------------------------------|---------------------------------------------------------------------------------------------------------------------------------------------------------------------------------------------------------------------------------------------------------------------------------------------------|------------|
|           | Assessment justification: | "Randomization was performed by the study statistician using a computer program with randomization blocked by gender."                                                                                                                                                                           | NS                                                                                              | "Body weight was assessed using a calibrated balance-beam scale to the nearest 0.1kg (0.25 pounds) with the subject clothed in a cloth hospital gown."                                                                                                                                                                                                                 | "There was no significant difference in attrition rates between groups based on $\chi^2$ analysis."<br><br>At the 18-month assessment 82.1% from Self-help group, 72.4% from the Moderate PA group and 81.8% from the High PA group contributed to assessment data.                               |            |
| <b>95</b> | <b>Jakicic 2015</b>       | LOW                                                                                                                                                                                                                                                                                              | LOW                                                                                             | LOW                                                                                                                                                                                                                                                                                                                                                                    | LOW                                                                                                                                                                                                                                                                                               |            |
|           | Assessment justification: | "The randomization sequence was generated by the study biostatistician (W.L.). Randomization was stratified based on gender (male or female), using a computer generated allocation, and only occurred after the participant had successfully completed baseline assessments."                   | Computer generated allocation.                                                                  | Weight measured objectively.                                                                                                                                                                                                                                                                                                                                           | Retention rate:<br>Intervention end: SBWP: 97.1%;<br>ADOPT: 90.1%<br>6-Month:<br>SBWP: 78.9%;<br>ADOPT: 73.2%<br>12-Month:<br>SBWP: 60.6%;<br>ADOPT: 62%<br>18-Month:<br>SBWP: 66.2%;<br>ADOPT: 69%                                                                                               |            |
| <b>96</b> | <b>Jebb 2011</b>          | LOW                                                                                                                                                                                                                                                                                              | LOW                                                                                             | LOW                                                                                                                                                                                                                                                                                                                                                                    | LOW                                                                                                                                                                                                                                                                                               |            |
|           |                           | "The randomisation sequence was computer generated with Stata (version 9.0) by APM and built into the database by the data manager, who was independent from the study team, and was stratified by country, sex, and diabetes status, with an upper limit of 50% of participants with diabetes." | "Treatment allocation was concealed by use of an online database (Filemaker Pro 9, version 3)." | "In the UK and Australia, bodyweight (in light clothes without shoes) and fat mass were measured with a Tanita BC-418 segmental body composition analyser (Tanita Corporation of America, Arlington Heights, IL, USA). In Germany, weight was measured in GP practices with standard scales, and fat mass was measured at the research centre with the Tanita BC-418." | 12-month retention rate:<br>Standard care: 214/395*100 = 54.2%<br>Commercial programme:<br>230/377*100 = 61%<br><br>18-month retention rate:<br>Standard care: 115/395*100 = 29.1%<br>Commercial programme:<br>121/377*100 = 32.1%<br><br>24-month retention rate:<br>Standard care: 98/395*100 = |            |

| Study ID  | Random sequence generation<br>(Selection bias) | Allocation concealment<br>(Selection bias)                                                                                              | Blinding of outcome<br>assessment<br>(Detection bias)                                                                                                                                                                                                                        | Incomplete outcome data<br>(Attrition bias)                | Other bias                                                                                                                                                                                                                                                                                                                                                                                                                                                                                                                   |                                                                                                                           |
|-----------|------------------------------------------------|-----------------------------------------------------------------------------------------------------------------------------------------|------------------------------------------------------------------------------------------------------------------------------------------------------------------------------------------------------------------------------------------------------------------------------|------------------------------------------------------------|------------------------------------------------------------------------------------------------------------------------------------------------------------------------------------------------------------------------------------------------------------------------------------------------------------------------------------------------------------------------------------------------------------------------------------------------------------------------------------------------------------------------------|---------------------------------------------------------------------------------------------------------------------------|
|           |                                                |                                                                                                                                         | "All participants who did not complete the 24-month visit but had not formally withdrawn from the study were asked to provide self-reported weights in a telephone follow-up survey (Australia and the UK) or a postal survey (Germany)." Majority was objectively reported. | 24.8%<br>Commercial programme:<br>$105/377 * 100 = 27.9\%$ |                                                                                                                                                                                                                                                                                                                                                                                                                                                                                                                              |                                                                                                                           |
| <b>97</b> | <b>Jebb 2017</b>                               | LOW                                                                                                                                     | LOW                                                                                                                                                                                                                                                                          | LOW                                                        | LOW                                                                                                                                                                                                                                                                                                                                                                                                                                                                                                                          |                                                                                                                           |
|           | Assessment justification:                      | "An independent statistician produced a computer generated randomisation list with 1:1 allocation using stratified block randomisation" | "After the nurse had confirmed eligibility, participants were enrolled in the study and the allocation was revealed using an online randomisation programme to ensure full allocation concealment. "                                                                         | Weight was objectively measured.                           | 95/140 UC and 104/138 TDR followed up at 12 months.                                                                                                                                                                                                                                                                                                                                                                                                                                                                          |                                                                                                                           |
| <b>98</b> | <b>Jeffery 1995</b>                            | UNCLEAR                                                                                                                                 | UNCLEAR                                                                                                                                                                                                                                                                      | LOW                                                        | LOW                                                                                                                                                                                                                                                                                                                                                                                                                                                                                                                          | UNCLEAR                                                                                                                   |
|           | Assessment justification:                      | "Study participants were randomized within centre and sex to one of five treatment groups."<br><br>No further information given.        | NS                                                                                                                                                                                                                                                                           | Weight measured objectively.                               | Retention rates for total sample:<br>6-month follow-up: 89% of total sample<br><br>12-month follow-up: 87% of total sample<br><br>18-month follow-up: 85% of total sample<br><br>"There was no differences among treatment groups at any individual follow-up point in the percentage of participants completing assessments. However, the percentage of participants who completed all three follow-ups differed by treatment group: control group (70%), SBT (65%), SBT + FP (90%), SBT + I (85%), and SBT + FP +I (83%)." | Weight data reported in text does not seem to match that presented in the figure for the 30-month data for the SBT group. |

| Study ID   | Random sequence generation<br>(Selection bias) | Allocation concealment<br>(Selection bias)                                                                                  | Blinding of outcome<br>assessment<br>(Detection bias)                                                                                                                                                                                                           | Incomplete outcome data<br>(Attrition bias)                                                                                                                                                             | Other bias                                                                                                                                                                                                                                                                                                                                                                                                                                                                                                         |      |
|------------|------------------------------------------------|-----------------------------------------------------------------------------------------------------------------------------|-----------------------------------------------------------------------------------------------------------------------------------------------------------------------------------------------------------------------------------------------------------------|---------------------------------------------------------------------------------------------------------------------------------------------------------------------------------------------------------|--------------------------------------------------------------------------------------------------------------------------------------------------------------------------------------------------------------------------------------------------------------------------------------------------------------------------------------------------------------------------------------------------------------------------------------------------------------------------------------------------------------------|------|
|            |                                                |                                                                                                                             |                                                                                                                                                                                                                                                                 | 30 month follow-up: 88% of total sample<br>"There were no differences among treatment groups, centers or sex in the percent of participants lost to follow-up."                                         |                                                                                                                                                                                                                                                                                                                                                                                                                                                                                                                    |      |
| <b>99</b>  | <b>Jeffery 2003</b>                            | UNCLEAR                                                                                                                     | UNCLEAR                                                                                                                                                                                                                                                         | LOW                                                                                                                                                                                                     | LOW                                                                                                                                                                                                                                                                                                                                                                                                                                                                                                                |      |
|            | Assessment justification:                      | "randomly assigned"                                                                                                         | NS                                                                                                                                                                                                                                                              | Weight measured objectively.                                                                                                                                                                            | "Retention of study participants was good over 18 mo of followup in both study conditions. Expressed as a percentage of randomly assigned subjects who returned for follow-up visits, retention rates at 6, 12, and 18 mo of the study were 90%, 82% and 87% in the SBT group and 94%, 79% and 80% in the HPA treatment group, respectively."<br>" At 30 mo, retention of study participants as a proportion of those randomly assigned was 79% (74 of 93) in the SBT group and 77% (84 of 109) in the HPA group." |      |
| <b>100</b> | <b>Jenkins 2017</b>                            | LOW                                                                                                                         | LOW                                                                                                                                                                                                                                                             | LOW                                                                                                                                                                                                     | HIGH                                                                                                                                                                                                                                                                                                                                                                                                                                                                                                               |      |
|            | Assessment justification:                      | "A statistician not involved in the day-to-day operation of the interventions created blocks of random assignments (n=39)." | "Assignments were sealed in ordered, numbered, opaque envelopes. Upon consent and eligibility confirmation for the individual or household, the coordinator opened each envelope in sequence and assigned the participant to the treatment group it contained." | "Completed questionnaires, fasting blood, anthropometric, and blood pressure measurements were obtained at baseline and at subsequent clinic attendances at 6 and 18 months at St. Michael's Hospital." | 6-month retention of 91% in the 2 food delivery arms versus 67% when no food was provided. When no food was provided, groups which had received a prior provision of food resulted at 18 months in an 81% retention versus 57% where no food had been provided.                                                                                                                                                                                                                                                    |      |
| <b>101</b> | <b>John 2011</b>                               | LOW                                                                                                                         | UNCLEAR                                                                                                                                                                                                                                                         | LOW                                                                                                                                                                                                     | LOW                                                                                                                                                                                                                                                                                                                                                                                                                                                                                                                | HIGH |

| Study ID |                           | Random sequence generation<br>(Selection bias)                                                                                                                                                                                                                                                                         | Allocation concealment<br>(Selection bias) | Blinding of outcome<br>assessment<br>(Detection bias)                                             | Incomplete outcome data<br>(Attrition bias)                                                                                                                                                                                                                                                                                                                                                                 | Other bias                                                                                                                                                                                                                                                                                                                                                                                                                                                                                                                                                                                                                                                                                                                                                                                                                                                                                                                                                                                                                                                                                                                                                                                      |
|----------|---------------------------|------------------------------------------------------------------------------------------------------------------------------------------------------------------------------------------------------------------------------------------------------------------------------------------------------------------------|--------------------------------------------|---------------------------------------------------------------------------------------------------|-------------------------------------------------------------------------------------------------------------------------------------------------------------------------------------------------------------------------------------------------------------------------------------------------------------------------------------------------------------------------------------------------------------|-------------------------------------------------------------------------------------------------------------------------------------------------------------------------------------------------------------------------------------------------------------------------------------------------------------------------------------------------------------------------------------------------------------------------------------------------------------------------------------------------------------------------------------------------------------------------------------------------------------------------------------------------------------------------------------------------------------------------------------------------------------------------------------------------------------------------------------------------------------------------------------------------------------------------------------------------------------------------------------------------------------------------------------------------------------------------------------------------------------------------------------------------------------------------------------------------|
|          | Assessment justification: | "Participants were randomized evenly to participate in a weight-monitoring program (control condition) or the same program with one of two financial incentive plans (deposit contract condition, hereafter referred to as DC) using a block size of six, with stratification based on sex and age (30–49 vs. 50–70)." | NS                                         | "At the end of each month, participants received \$20 for returning to the clinic to be weighed." | 32 weeks follow-up: "At the primary outcome point, ten percent of participants were lost to follow-up (C = 1/22, DC1 = 1/22, DC2 = 4/22)"<br>68 week follow-up: Sixty-five percent of participants [43/66; Control = 14/22*100 = 63.6%; DC = 29/44* 100 = 65.9% ] returned to the clinic for a follow-up weigh-in approximately 36 weeks after the last participant had completed the 32-week intervention. | Study involved randomisation to 3 arms: (1) weight-monitoring program (control condition); (2) weight-monitoring program plus deposit contract condition 1; (3) Weight-monitoring program plus deposit contract condition 2. They differed as follows: "For half of the DC participants, the first 24 weeks of the study were described, in both written and verbal communication to participants, as the 'weight loss period;' the final 8 weeks (i.e., weeks 25–32) were framed as the 'maintenance of weight loss period' (DC1). The second incentive condition was the same except that there was no explicit distinction between the two periods of the study (DC2), which was also the case in the control condition."<br>The two deposit contract condition groups have been extracted as 1 group as only reported as such<br>Varying follow-up depending on time of recruitment: "To assess longer term maintenance following the 32-week intervention, participants returned for a weigh-in approximately 36 weeks after the last participant had completed the 32-week intervention."; "Recruitment began in June 2008 and ended in September 2008; follow-up ended in January 2010." |
| 102      | Jolly 2011                | LOW                                                                                                                                                                                                                                                                                                                    | LOW                                        | HIGH                                                                                              | LOW                                                                                                                                                                                                                                                                                                                                                                                                         |                                                                                                                                                                                                                                                                                                                                                                                                                                                                                                                                                                                                                                                                                                                                                                                                                                                                                                                                                                                                                                                                                                                                                                                                 |

| Study ID |                           | Random sequence generation<br>(Selection bias)                              | Allocation concealment<br>(Selection bias)                                                                                                                                                                                                                                                                                                                                                                                                                 | Blinding of outcome<br>assessment<br>(Detection bias)                                                                                                                                                                                                                                                                                                                                                                                                                                                                                                                                                                                                                                                                                                                                                                                                                                                                                                                                                                                                                                                                                                                                                                                            | Incomplete outcome data<br>(Attrition bias)                                                                                                                                                                                                                                                                                                                                                                                                                              | Other bias |
|----------|---------------------------|-----------------------------------------------------------------------------|------------------------------------------------------------------------------------------------------------------------------------------------------------------------------------------------------------------------------------------------------------------------------------------------------------------------------------------------------------------------------------------------------------------------------------------------------------|--------------------------------------------------------------------------------------------------------------------------------------------------------------------------------------------------------------------------------------------------------------------------------------------------------------------------------------------------------------------------------------------------------------------------------------------------------------------------------------------------------------------------------------------------------------------------------------------------------------------------------------------------------------------------------------------------------------------------------------------------------------------------------------------------------------------------------------------------------------------------------------------------------------------------------------------------------------------------------------------------------------------------------------------------------------------------------------------------------------------------------------------------------------------------------------------------------------------------------------------------|--------------------------------------------------------------------------------------------------------------------------------------------------------------------------------------------------------------------------------------------------------------------------------------------------------------------------------------------------------------------------------------------------------------------------------------------------------------------------|------------|
|          | Assessment justification: | "The randomisation sequence was prepared by an independent statistician..." | "An independent statistician prepared two separate randomisation sequences, and, to ensure blinding, the allocations were placed in opaque, consecutively numbered envelopes, which the call centre staff used in order. The block sizes were determined to achieve one to one randomisation across groups, except for the two primary care arms, for which spaces were limited and allocation was in a ratio of 1 to 0.7 compared with the other groups." | <p>"When participants attend their first weight-loss session in the six interventions, the leader/counsellor measures participants' height and weight. Scales are validated by the research team using standardised weights, unless evidence of recent independent validation is provided. The commercial providers often use self-reported height, so this will be re-measured at follow-up by the blinded assessor. People in the comparator control group and people who are randomised but who do not attend their allocated programme are contacted and a researcher makes an appointment to measure height and weight. During the 12-week programmes the service providers record weights on each visit. The comparator group are weighed at baseline only."</p> <p>"At three months after programme start (programme end) the service providers weigh participants. Participants who are no longer attending their allocated programme are contacted and offered follow-up at home or another convenient location. If participants decline to be followed-up in person, they are asked to provide a self-reported weight, which is recorded as self-report. "</p> <p>Flow of participants through trial figure highlights that over a</p> | "At programme end, 658 (88.9%) participants were followed up; 522 (70.5%) were followed up at one year (fig 1)."<br>Attrition rate at intervention end (3 months):<br>Weight watches: 95%; slimming world: 93%; Rosemary Conley: 88%; NHS Size down: 87%; GP: 82.6%;<br>Pharmacy: 82.3%; Choice: 95%; Comparator: 83%<br>Weight watches: 82%; slimming world: 62%; Rosemary Conley: 74%; NHS Size down: 66%; GP: 65.7%;<br>Pharmacy: 58.6%; Choice: 79%; Comparator: 72% |            |



| Study ID   |                           | Random sequence generation<br>(Selection bias)                                                                                                                                                                                                                                                            | Allocation concealment<br>(Selection bias) | Blinding of outcome<br>assessment<br>(Detection bias)                                                                                                       | Incomplete outcome data<br>(Attrition bias)                                                                                                          | Other bias |
|------------|---------------------------|-----------------------------------------------------------------------------------------------------------------------------------------------------------------------------------------------------------------------------------------------------------------------------------------------------------|--------------------------------------------|-------------------------------------------------------------------------------------------------------------------------------------------------------------|------------------------------------------------------------------------------------------------------------------------------------------------------|------------|
|            |                           |                                                                                                                                                                                                                                                                                                           |                                            | third of weight measures were self-reported.                                                                                                                |                                                                                                                                                      |            |
| <b>103</b> | <b>Jones 1986</b>         | UNCLEAR                                                                                                                                                                                                                                                                                                   | UNCLEAR                                    | UNCLEAR                                                                                                                                                     | HIGH                                                                                                                                                 |            |
|            | Assessment justification: | NS                                                                                                                                                                                                                                                                                                        | NS                                         | "On the first appointment height and weight were measured, using a beam balance scale"; No information on how weight was measured at follow-up time points. | "Of 160 subjects attending an initial interview, only 69 (43%) completed treatment; of these, 58 were seen at the 1-year follow-up." (36.3%)         |            |
| <b>104</b> | <b>Jones 1999</b>         | UNCLEAR                                                                                                                                                                                                                                                                                                   | UNCLEAR                                    | UNCLEAR                                                                                                                                                     | LOW                                                                                                                                                  |            |
|            | Assessment justification: | "Patients were randomized in a single blind fashion to either the weight loss intervention group or the control group. Randomization was done in a blocked fashion to ensure that equal numbers of the three HOT treatment groups were in both the weight loss intervention group and the control group." | NS                                         | "Weights for both groups were measured at 6-month intervals during follow-up required by the HOT protocol."                                                 | "Four patients in the weight loss group and five patients in the control group did not complete the study and were excluded from the data analysis." |            |
| <b>105</b> | <b>Katula 2013</b>        | LOW                                                                                                                                                                                                                                                                                                       | LOW                                        | LOW                                                                                                                                                         | LOW                                                                                                                                                  |            |

| Study ID   |                           | Random sequence generation<br>(Selection bias)                                                                                                                                                                                                                                                                                                                                      | Allocation concealment<br>(Selection bias)                                                            | Blinding of outcome<br>assessment<br>(Detection bias)                                                                                                                                                                                                                                                                                                         | Incomplete outcome data<br>(Attrition bias)                                                                                                                                                                                                                                                                                                 | Other bias |
|------------|---------------------------|-------------------------------------------------------------------------------------------------------------------------------------------------------------------------------------------------------------------------------------------------------------------------------------------------------------------------------------------------------------------------------------|-------------------------------------------------------------------------------------------------------|---------------------------------------------------------------------------------------------------------------------------------------------------------------------------------------------------------------------------------------------------------------------------------------------------------------------------------------------------------------|---------------------------------------------------------------------------------------------------------------------------------------------------------------------------------------------------------------------------------------------------------------------------------------------------------------------------------------------|------------|
|            | Assessment justification: | "Eligible participants were randomly assigned, if equal probability, to either the lifestyle intervention or the enhanced usual care arm using a web-based data management system that verifies eligibility."                                                                                                                                                                       | Refer to 'Random sequence generation (selection bias)'.                                               | "Assessments are performed at 6 month intervals (baseline, 6-, 12-, 18- and 24-months post-randomization) at the GCRC. Psychosocial measures are self-administered and remaining measures are completed by trained study staff or clinic staff."                                                                                                              | 6-month assessment visit: UC: 141 attended (94%); LWL: 139 attended (92%);<br>12-month assessment visit: UC: 138 attended (92%); LWL: 135 attended (89%);<br>18-month assessment visit: UC: 132 attended (88%); LWL: 125 attended (83%);<br>24-month assessment visit: UC: 134 attended (89%)L LWL: 127 attended (84%)                      |            |
| <b>106</b> | <b>Katzer 2008</b>        | UNCLEAR                                                                                                                                                                                                                                                                                                                                                                             | UNCLEAR                                                                                               | LOW                                                                                                                                                                                                                                                                                                                                                           | LOW                                                                                                                                                                                                                                                                                                                                         |            |
|            | Assessment justification: | "Randomization was stratified by age and BMI and performed independently by a statistician."                                                                                                                                                                                                                                                                                        | NS                                                                                                    | Weight objectively measured.                                                                                                                                                                                                                                                                                                                                  | "By the end of the initial 10-week intervention, 53 participants had withdrawn from the study (24%), and an additional 28 participants (overall dropout rate=37%) had withdrawn by the 12-month follow-up. Dropout rates were similar in the three treatments (data not shown)."                                                            |            |
| <b>107</b> | <b>Keogh 2014</b>         | LOW                                                                                                                                                                                                                                                                                                                                                                                 | LOW                                                                                                   | LOW                                                                                                                                                                                                                                                                                                                                                           | HIGH                                                                                                                                                                                                                                                                                                                                        |            |
|            | Assessment justification: | "Participants were divided into two groups according to age and BMI and allocated 1:1 to treatments using computerized random number generation."<br>"The two groups were randomized using Microsoft Excel random number after being blocked according to age and BMI."<br>Participants will be randomized using the minimization method - (Trial registration ACTRN12612000197831) | Sealed envelopes containing the diet allocation will be used (Trial registration ACTRN12612000197831) | Height and weight were measured at the initial visit and BMI was calculated (weight [kg]/height [m <sup>2</sup> ]).<br>Weight was measured at all visits (2 weeks apart for 8 weeks and at 12 month).<br>Subjects were asked to remove shoes prior to both measurements.<br>Although subjects were not given pre-measurement instructions regarding fluid and | "...high drop-out rate experienced early in the study may have limited our ability to detect a statistical difference. Forty percent of the drop-outs occurred between baseline and week 8, thereafter only 8 of 44, i.e. 20% which is the usual attrition seen in such studies."<br>Intermittent dieting 19/39<br>continuous dieting 17/36 |            |

| Study ID   |                           | Random sequence generation<br>(Selection bias)                                                                  | Allocation concealment<br>(Selection bias)                                                                                                                                                                                                                                                                           | Blinding of outcome<br>assessment<br>(Detection bias)                                                                                                                                                                                                                           | Incomplete outcome data<br>(Attrition bias)                                                                                                                                                                                                                                                                                                                                                                                                                                                        | Other bias                                                                                                                                                                                                                                                                                                                                                                                                                                                                                                                       |
|------------|---------------------------|-----------------------------------------------------------------------------------------------------------------|----------------------------------------------------------------------------------------------------------------------------------------------------------------------------------------------------------------------------------------------------------------------------------------------------------------------|---------------------------------------------------------------------------------------------------------------------------------------------------------------------------------------------------------------------------------------------------------------------------------|----------------------------------------------------------------------------------------------------------------------------------------------------------------------------------------------------------------------------------------------------------------------------------------------------------------------------------------------------------------------------------------------------------------------------------------------------------------------------------------------------|----------------------------------------------------------------------------------------------------------------------------------------------------------------------------------------------------------------------------------------------------------------------------------------------------------------------------------------------------------------------------------------------------------------------------------------------------------------------------------------------------------------------------------|
|            |                           |                                                                                                                 |                                                                                                                                                                                                                                                                                                                      | food intake, effort was made to measure weight at approximately the same time each visit.                                                                                                                                                                                       |                                                                                                                                                                                                                                                                                                                                                                                                                                                                                                    |                                                                                                                                                                                                                                                                                                                                                                                                                                                                                                                                  |
| <b>108</b> | <b>Keranen 2009</b>       | LOW                                                                                                             | LOW                                                                                                                                                                                                                                                                                                                  | LOW                                                                                                                                                                                                                                                                             | LOW                                                                                                                                                                                                                                                                                                                                                                                                                                                                                                |                                                                                                                                                                                                                                                                                                                                                                                                                                                                                                                                  |
|            | Assessment justification: | Simple randomization without blocking (Fig. 2). Random sampling numbers                                         | “The random sampling numbers were unknown to any of the investigators, study nurses or nutritionists and were contained in a set of sealed envelopes, each bearing on the outside only the number. After acceptance of a patient by the physician, the appropriate numbered envelope was opened by the study nurse.” | Weight measured objectively.                                                                                                                                                                                                                                                    | Short counseling: 36/47 received intervention; 29/47 at follow up<br>LOW<br>Intensive counseling: 26/35 received intervention; 20/35 at follow up<br>LOW                                                                                                                                                                                                                                                                                                                                           |                                                                                                                                                                                                                                                                                                                                                                                                                                                                                                                                  |
| <b>109</b> | <b>King 1989</b>          | LOW                                                                                                             | LOW                                                                                                                                                                                                                                                                                                                  | LOW                                                                                                                                                                                                                                                                             | LOW                                                                                                                                                                                                                                                                                                                                                                                                                                                                                                | HIGH                                                                                                                                                                                                                                                                                                                                                                                                                                                                                                                             |
|            | Assessment justification: | The subjects were randomly assigned within each cohort by selecting one envelope for a set of sealed envelopes. | Sealed envelopes.                                                                                                                                                                                                                                                                                                    | "Subjects' height and weight were measured using a balance-beam scale, with subjects wearing normal indoor clothing (without shoes). Subjects were weighed at the start and at months 6 and 12 of year 2 by staff members blind to each subject's year-2 condition assignment." | "Of the 51 subjects initially randomized to weight loss through energy restriction during year 1, 44 (86.3%) participated in the year-2 maintenance study. Of the 52 subjects initially randomized to weight loss through exercise during year 1, 46 (88.5%) participated in the year-2 maintenance study."<br><br>"Of the 90 subjects participating in the maintenance study, complete year-2 total body weight data were obtained for 36 (81.8%) of 44 dieters and 36 (78.3%) of 46 exercisers." | The study randomised to three groups 1. Diet, 2. exercise or 3. control. At the end of the 1-year intervention, participants in the diet group and exercise group were re-randomised within each condition to either a maintenance condition or control condition, forming four groups for the follow-up period (the original control group was not followed up after intervention end.) Data reported was broken down into these 4 groups (formed following re-randomisation after intervention end), however we have extracted |

| Study ID   | Random sequence generation<br>(Selection bias) | Allocation concealment<br>(Selection bias)                                                                                                                                                                                    | Blinding of outcome<br>assessment<br>(Detection bias)                                                                                                                                                                                           | Incomplete outcome data<br>(Attrition bias)                                                                                            | Other bias                                                                                                                                                                                               |                                                                                                                                    |
|------------|------------------------------------------------|-------------------------------------------------------------------------------------------------------------------------------------------------------------------------------------------------------------------------------|-------------------------------------------------------------------------------------------------------------------------------------------------------------------------------------------------------------------------------------------------|----------------------------------------------------------------------------------------------------------------------------------------|----------------------------------------------------------------------------------------------------------------------------------------------------------------------------------------------------------|------------------------------------------------------------------------------------------------------------------------------------|
|            |                                                |                                                                                                                                                                                                                               |                                                                                                                                                                                                                                                 |                                                                                                                                        | and combined data for the original 2 groups (the control group data was not extracted as this group was not followed up after intervention end).                                                         |                                                                                                                                    |
| <b>110</b> | <b>Kingsley 1977</b>                           | UNCLEAR                                                                                                                                                                                                                       | UNCLEAR                                                                                                                                                                                                                                         | LOW                                                                                                                                    | LOW                                                                                                                                                                                                      | HIGH                                                                                                                               |
|            | Assessment justification:                      | "Subjects were randomly assigned from stratified blocks of percentage overweight to one of three treatment groups on the basis of within-sample matching with an n of 26 in each group."<br><br>No further information given. | NS                                                                                                                                                                                                                                              | Weight measured objectively.                                                                                                           | Social pressure: 20/26<br>Group behavioural: 23/26<br>Individual behavioural: 22/26                                                                                                                      | Social support intervention is offensive and would not be permitted today. Affects generalisability and validity of study results. |
| <b>111</b> | <b>Knauper 2018</b>                            | LOW                                                                                                                                                                                                                           | UNCLEAR                                                                                                                                                                                                                                         | LOW                                                                                                                                    | HIGH                                                                                                                                                                                                     |                                                                                                                                    |
|            | Assessment justification:                      | "To randomize participants to the two intervention arms, a randomization sheet generated by a random digit generator is used (www.randomizer.org)."                                                                           | "Throughout the recruitment process, the list of randomized numbers will be assigned to participants by the research coordinator in sequential order from 1 to 154 in the order in which participants completes the baseline CHIP appointment." | "However, the staff assessing the outcome variables (e.g. weight, EST) is blind to which intervention the participants were assigned." | 44.9% of the Enhanced DPP group attended the 12-month follow-up versus 70% of the standard DPP arm.<br><br>24-Month follow-up: Enhanced DPP: $51/107*100 = 47.7\%$ ; Standard DPP: $51/101*100 = 50.5\%$ |                                                                                                                                    |
| <b>112</b> | <b>Kuller 2012</b>                             | LOW                                                                                                                                                                                                                           | LOW                                                                                                                                                                                                                                             | LOW                                                                                                                                    | LOW                                                                                                                                                                                                      |                                                                                                                                    |

| Study ID   |                           | Random sequence generation<br>(Selection bias)                                                                                                                                                                                                                                                                                                                                                    | Allocation concealment<br>(Selection bias)                                                         | Blinding of outcome<br>assessment<br>(Detection bias)                                                                                                                                                                                                | Incomplete outcome data<br>(Attrition bias)                                                                                                                                                                                            | Other bias |
|------------|---------------------------|---------------------------------------------------------------------------------------------------------------------------------------------------------------------------------------------------------------------------------------------------------------------------------------------------------------------------------------------------------------------------------------------------|----------------------------------------------------------------------------------------------------|------------------------------------------------------------------------------------------------------------------------------------------------------------------------------------------------------------------------------------------------------|----------------------------------------------------------------------------------------------------------------------------------------------------------------------------------------------------------------------------------------|------------|
|            | Assessment justification: | Block randomisation. Randomization sequence designed by independent statistician'                                                                                                                                                                                                                                                                                                                 | "...allocation via sealed, numbered envelopes opened sequentially."                                | Weight, height, and waist circumference were measured at clinic visits at baseline, 18 months, and 30 months. Standard laboratory measurements included total cholesterol, HDL-C, triglycerides, insulin, and glucose after 12-hour fasting samples. | 83% followed up at 18m overall: 82% intervention, 84% control. Reasons for attrition NS.                                                                                                                                               |            |
| <b>113</b> | <b>Kumanyika 2012</b>     | LOW                                                                                                                                                                                                                                                                                                                                                                                               | LOW                                                                                                | LOW                                                                                                                                                                                                                                                  | LOW                                                                                                                                                                                                                                    |            |
|            | Assessment justification: | "Eligible participants stratified by gender and age (~35 or over 35 year) were randomized to one of two treatment groups in a 1:1 ratio with randomly permuted blocks (block sizes of 2-6)."                                                                                                                                                                                                      | "Random assignments were concealed from both participant and study staff prior to implementation." | Weight objectively measured.                                                                                                                                                                                                                         | Descriptive analysis:<br>Basic Program: 98/137 at 12mths<br>Basic Plus Program: 89/124 at 12mths<br>Weight change ( $\geq 1$ wt measurement after baseline)<br>Basic program 133/137 at 12mths<br>Basic plus program 124/124 at 12mths |            |
| <b>114</b> | <b>Leahey 2014</b>        | LOW                                                                                                                                                                                                                                                                                                                                                                                               | UNCLEAR                                                                                            | LOW                                                                                                                                                                                                                                                  | LOW                                                                                                                                                                                                                                    |            |
|            | Assessment justification: | With a random number generator, we assigned participants by using a 1:2:2 randomization scheme.                                                                                                                                                                                                                                                                                                   | NS                                                                                                 | Weight objectively measured.                                                                                                                                                                                                                         | Less than 50% attrition at 6- and 12-month follow-up.                                                                                                                                                                                  |            |
| <b>115</b> | <b>Leahey 2015</b>        | LOW                                                                                                                                                                                                                                                                                                                                                                                               | UNCLEAR                                                                                            | LOW                                                                                                                                                                                                                                                  | LOW                                                                                                                                                                                                                                    |            |
|            | Assessment justification: | "Approximately 50% of participants were the only participant within their team, but to avoid contamination, when multiple individuals were recruited from the same SURI team they were assigned as a single unit within the simple randomization procedure to ensure that all team members were randomized to the same study arm. The study statistician completed all randomization procedures." | NS                                                                                                 | "Weight was measured to the 0.1 kg using a digital scale and height was measured at baseline using a wallmounted stadiometer." "Assessments were conducted by blinded staff."                                                                        | Drop out at 12-months: SI: 76/91*100 = 86%; SII: 84/89*100 = 94%; SIG: 82/88*100 = 93%                                                                                                                                                 |            |
| <b>116</b> | <b>Lejeune 2003</b>       | UNCLEAR                                                                                                                                                                                                                                                                                                                                                                                           | UNCLEAR                                                                                            | LOW                                                                                                                                                                                                                                                  | LOW                                                                                                                                                                                                                                    |            |

| Study ID   |                           | Random sequence generation<br>(Selection bias)                                                                                                                                                                                                                                                                                                                                                                                                                                                                                                                                                                                                                         | Allocation concealment<br>(Selection bias)                                                                                                          | Blinding of outcome<br>assessment<br>(Detection bias) | Incomplete outcome data<br>(Attrition bias)                                                                      | Other bias |
|------------|---------------------------|------------------------------------------------------------------------------------------------------------------------------------------------------------------------------------------------------------------------------------------------------------------------------------------------------------------------------------------------------------------------------------------------------------------------------------------------------------------------------------------------------------------------------------------------------------------------------------------------------------------------------------------------------------------------|-----------------------------------------------------------------------------------------------------------------------------------------------------|-------------------------------------------------------|------------------------------------------------------------------------------------------------------------------|------------|
|            | Assessment justification: | NS                                                                                                                                                                                                                                                                                                                                                                                                                                                                                                                                                                                                                                                                     | NS                                                                                                                                                  | Weight objectively measured.                          | Retention rate:<br>Week 13:<br>D Group: 85%;<br>DE group: 100%<br><br>Week 53:<br>D Group: 75%;<br>DE group: 70% |            |
| <b>117</b> | <b>Ley 2004</b>           | HIGH                                                                                                                                                                                                                                                                                                                                                                                                                                                                                                                                                                                                                                                                   | UNCLEAR                                                                                                                                             | LOW                                                   | LOW                                                                                                              |            |
|            | Assessment justification: | <p>“They were then individually randomised to either an intervention group that was asked to consume a reduced-fat (RF), but otherwise ad libitum diet, or a control diet (CD) group that continued with their usual diet. An exception to this individual randomisation was made at one work-site where all six participants were Pacific Island’s women who worked closely together. They were all assigned to the RF group because individual randomisation was impractical. All those found to have diabetes on re-testing were referred to their general practitioners for management, but were still randomised for the study.”</p> <p>Broken randomisation.</p> | All those found to have diabetes on re-testing were referred to their general practitioners for management but were still randomised for the study. | Weight objectively measured.                          | less than 50% attrition at 1 - and 5-year follow-up.                                                             |            |
| <b>118</b> | <b>Li 2016</b>            | LOW                                                                                                                                                                                                                                                                                                                                                                                                                                                                                                                                                                                                                                                                    | UNCLEAR                                                                                                                                             | LOW                                                   | LOW                                                                                                              | UNCLEAR    |

| Study ID   |                           | Random sequence generation<br>(Selection bias)                                                                                                   | Allocation concealment<br>(Selection bias) | Blinding of outcome<br>assessment<br>(Detection bias)                                                                                                                                    | Incomplete outcome data<br>(Attrition bias)                                                                                                                                                                                                                                            | Other bias                                                                                                                                                                                                                                                                                                                                                                                                                                                                                                                                                                                                                                                                                                                                                          |
|------------|---------------------------|--------------------------------------------------------------------------------------------------------------------------------------------------|--------------------------------------------|------------------------------------------------------------------------------------------------------------------------------------------------------------------------------------------|----------------------------------------------------------------------------------------------------------------------------------------------------------------------------------------------------------------------------------------------------------------------------------------|---------------------------------------------------------------------------------------------------------------------------------------------------------------------------------------------------------------------------------------------------------------------------------------------------------------------------------------------------------------------------------------------------------------------------------------------------------------------------------------------------------------------------------------------------------------------------------------------------------------------------------------------------------------------------------------------------------------------------------------------------------------------|
|            | Assessment justification: | "After a one-week run-in period, participants were randomly allocated to one of the following four groups by computer-generated random numbers." | NS                                         | "All measurements were conducted with standard procedures by the same clinical staff in the third hospital of Inner Mongolia medical college, who were blinded to the group allocation." | Percentage of participants retained at follow-up at 1 year:<br>Usual care: 98.3%; Diet: 96.2%;<br>50g oats: 96.3%; 94.9%;<br>"Eleven patients dropped out during the 1-year follow-up due to personal reasons with no difference in drop-out rates among the four groups (p = 0.774)." | Unclear whether groups were stratified by BMI in parent study. "A subgroup of 298 subjects, meeting the Chinese criteria of overweight (body mass index $\geq 24$ kg/m <sup>2</sup> ), was selected from 445 adult patients with T2DM, who had participated in the 30-day centralized management of a dietary program and the 1-year free-living follow-up in Baotou, China."                                                                                                                                                                                                                                                                                                                                                                                       |
| <b>119</b> | <b>Li 2005</b>            | LOW                                                                                                                                              | UNCLEAR                                    | LOW                                                                                                                                                                                      | LOW                                                                                                                                                                                                                                                                                    | HIGH                                                                                                                                                                                                                                                                                                                                                                                                                                                                                                                                                                                                                                                                                                                                                                |
|            | Assessment justification: | "A random, permuted, block design was utilized for placement of subjects into the two treatment groups."                                         | NS                                         | Weight measured objectively.                                                                                                                                                             | Retention rate:<br>Baseline:<br>MR: $49/52 \times 100 = 94.2\%$ ;<br>IDP: $44/52 \times 100 = 84.6\%$<br><br>6-months:<br>MR: $46/52 \times 100 = 88.5\%$ ;<br>IDP: $36/52 \times 100 = 69.2\%$<br><br>12-months: MR: $42/52 \times 100 = 80.8\%$ ; IDP: $35/52 \times 100 = 67.2\%$   | MR group continued to received the meal replacements for the 12 month study duration at lower volume.<br>"For the first 5 days of the study, subjects randomized into the MR group replaced three meals per day with a soy MR (Slim Fast Food Company, Inc. West Palm Beach, FL 33401, USA). They also were instructed to add fruits and vegetables to their dietary intake. Thereafter, the MR group replaced two meals with the soy MR with continuing use of fruits and vegetables as snacks, plus a sensible third meal for three additional months. After the 3 months, subjects in the MR group were instructed to replace one to two meals per day with the soy shakes and consume correspondingly one to two sensible meals for the duration of the study." |

| Study ID   |                           | Random sequence generation<br>(Selection bias)                                                                                                                                                                                                                                         | Allocation concealment<br>(Selection bias)                                                                                                                                                                                                                                                                                                                                    | Blinding of outcome<br>assessment<br>(Detection bias) | Incomplete outcome data<br>(Attrition bias)                                                                                                                                            | Other bias                                                                                                                                                                                                                                                                                                                                                                                                                                                                                                                                                                                        |
|------------|---------------------------|----------------------------------------------------------------------------------------------------------------------------------------------------------------------------------------------------------------------------------------------------------------------------------------|-------------------------------------------------------------------------------------------------------------------------------------------------------------------------------------------------------------------------------------------------------------------------------------------------------------------------------------------------------------------------------|-------------------------------------------------------|----------------------------------------------------------------------------------------------------------------------------------------------------------------------------------------|---------------------------------------------------------------------------------------------------------------------------------------------------------------------------------------------------------------------------------------------------------------------------------------------------------------------------------------------------------------------------------------------------------------------------------------------------------------------------------------------------------------------------------------------------------------------------------------------------|
| <b>120</b> | <b>Lindstrom 2003</b>     | LOW                                                                                                                                                                                                                                                                                    | UNCLEAR                                                                                                                                                                                                                                                                                                                                                                       | LOW                                                   | LOW                                                                                                                                                                                    | HIGH                                                                                                                                                                                                                                                                                                                                                                                                                                                                                                                                                                                              |
|            | Assessment justification: | A randomization list was used                                                                                                                                                                                                                                                          | The nurses scheduling visits were blinded to randomisation. Study staff were not blinded.                                                                                                                                                                                                                                                                                     | Weight objectively measured.                          | At 3 years:<br>203/ 257 Control<br>231/ 265 Intervention<br><br>At 4 years:<br>170/257 Control<br>198/265 Intervention<br><br>From 5 years:<br>166/257 Control<br>200/265 Intervention | After the decision to end the intervention period, the intervention was continued until each participant's next scheduled annual clinic visit. The end date thus varied from March 2000 to December 2001. After active intervention (median 4 years, range 1–6 years), participants still free of diabetes and willing to continue their participation (from year 6 - 200 in the intervention group and 166 in the control group) were further followed until diabetes diagnosis, dropout or the end of 2009, with a median total follow-up of 9 years and a time span of 13 years from baseline. |
| <b>121</b> | <b>Liss 2016</b>          | LOW                                                                                                                                                                                                                                                                                    | LOW                                                                                                                                                                                                                                                                                                                                                                           | LOW                                                   | LOW                                                                                                                                                                                    |                                                                                                                                                                                                                                                                                                                                                                                                                                                                                                                                                                                                   |
|            | Assessment justification: | "Prior to the study enrollment phase, randomization lists were generated by a senior statistician using SAS, version 9.2 (Cary, NC). Lists were created using 1-to-1 allocation, with blocks of 4, stratified by Y study site and race (non-Hispanic White; African-American; Other)." | "Randomization blocks were implemented by the study programmer (AC) and pre-loaded into a back-end field of a Microsoft Access (Redmond, WA) database table that was not available to study RAs. After the study RA collected data required for randomization at each participant's screening/enrollment visit, she clicked a button in Access to execute the randomization." | Weight objectively measured.                          | At 12 months, 78% of participants from the GLI group and 76% from the standard care group returned for outcome assessment.                                                             |                                                                                                                                                                                                                                                                                                                                                                                                                                                                                                                                                                                                   |



| Study ID   |                           | Random sequence generation<br>(Selection bias)                                                                                                                                                                                                                                                                                               | Allocation concealment<br>(Selection bias)                                                                                                                                                                                                                        | Blinding of outcome<br>assessment<br>(Detection bias)                                                                                                                                                                                                                                                                                                                                | Incomplete outcome data<br>(Attrition bias)                                                                                                                                                                                                                                                                        | Other bias |
|------------|---------------------------|----------------------------------------------------------------------------------------------------------------------------------------------------------------------------------------------------------------------------------------------------------------------------------------------------------------------------------------------|-------------------------------------------------------------------------------------------------------------------------------------------------------------------------------------------------------------------------------------------------------------------|--------------------------------------------------------------------------------------------------------------------------------------------------------------------------------------------------------------------------------------------------------------------------------------------------------------------------------------------------------------------------------------|--------------------------------------------------------------------------------------------------------------------------------------------------------------------------------------------------------------------------------------------------------------------------------------------------------------------|------------|
| <b>122</b> | <b>Little 2016</b>        | LOW                                                                                                                                                                                                                                                                                                                                          | LOW                                                                                                                                                                                                                                                               | UNCLEAR                                                                                                                                                                                                                                                                                                                                                                              | LOW                                                                                                                                                                                                                                                                                                                |            |
|            | Assessment justification: | “Upon completion of baseline questionnaires, the website automatically randomly assigned patients (1:1:1) via computer-generated random numbers...”                                                                                                                                                                                          | “Participants and investigators were masked to group allocation at the point of randomisation...”                                                                                                                                                                 | “Weight loss was measured with participants lightly clothed without shoes, at the same time every day when possible, with automated digital scales (Tanita Europe BV, Amsterdam, the Netherlands).”<br>“When a blinded weight measurement could not be obtained, we used practice nurses’ recorded weights, and when that was not possible, we used participants’ reported weights.” | Weight loss averaged over 12 months was recorded in 666 (81%) participants.”<br>Control: 136/279 weight at 6mths (HIGH); 227/279 weight at 12mths (LOW).<br>Power + face to face: 148/269 wt at 6mths (LOW); 221/269 wt at 12mths (LOW).<br>Power + remote: 155/270 wt at 6mths (LOW); 218/270 wt at 12mths (LOW). |            |
| <b>123</b> | <b>Long 1983</b>          | UNCLEAR                                                                                                                                                                                                                                                                                                                                      | UNCLEAR                                                                                                                                                                                                                                                           | LOW                                                                                                                                                                                                                                                                                                                                                                                  | LOW                                                                                                                                                                                                                                                                                                                |            |
|            | Assessment justification: | NS                                                                                                                                                                                                                                                                                                                                           | NS                                                                                                                                                                                                                                                                | "Patients were weighted in private..."                                                                                                                                                                                                                                                                                                                                               | "At one year follow-up four treated subjects were lost and one was excluded because of a starvation period in hospital. Analysis of follow up data involved a total n of 23 (PD=9; ID=7; DD=7)."                                                                                                                   |            |
| <b>124</b> | <b>Lowe 2018</b>          | LOW                                                                                                                                                                                                                                                                                                                                          | UNCLEAR                                                                                                                                                                                                                                                           | LOW                                                                                                                                                                                                                                                                                                                                                                                  | LOW                                                                                                                                                                                                                                                                                                                |            |
|            | Assessment justification: | Simple randomization via a table of random numbers was used to evenly assign participants to 1 of 3 conditions:                                                                                                                                                                                                                              | NS                                                                                                                                                                                                                                                                | Weight measured objectively.                                                                                                                                                                                                                                                                                                                                                         | Less than 50% attrition at 36-month follow-up.                                                                                                                                                                                                                                                                     |            |
| <b>125</b> | <b>Ma 2015</b>            | LOW                                                                                                                                                                                                                                                                                                                                          | LOW                                                                                                                                                                                                                                                               | LOW                                                                                                                                                                                                                                                                                                                                                                                  | LOW                                                                                                                                                                                                                                                                                                                |            |
|            | Assessment justification: | We applied our published dynamic block randomization method to assure better than chance between-treatment balance across six prognostic factors (study site, age, sex, race/ethnicity, BMI, and ACQ score). The method automatically ensures allocation concealment. Participants were randomly assigned to one of two treatment conditions | This randomization procedure not only minimizes imbalance for the chosen baseline covariates between treatment groups and correlated characteristics, but also ensures concealment of treatment allocation, with recruitment staff completely unable to influence | 'Both groups given a weight scale.'<br>'Published protocols were used to obtain height (baseline only), weight, waist circumference, and blood pressure measurements.'<br>Indicates weighed.                                                                                                                                                                                         | Control:<br>157/165 at 6mths; 147/165 at 12mths.<br>Intervention:<br>154/165 at 6mths; 142/165 at 12mths.                                                                                                                                                                                                          |            |

| Study ID   | Random sequence generation<br>(Selection bias) | Allocation concealment<br>(Selection bias)                                                                                                                                                                                                                                                                                                                                                                                                 | Blinding of outcome<br>assessment<br>(Detection bias) | Incomplete outcome data<br>(Attrition bias)                                                                                                                                                                             | Other bias                                                                                                                            |
|------------|------------------------------------------------|--------------------------------------------------------------------------------------------------------------------------------------------------------------------------------------------------------------------------------------------------------------------------------------------------------------------------------------------------------------------------------------------------------------------------------------------|-------------------------------------------------------|-------------------------------------------------------------------------------------------------------------------------------------------------------------------------------------------------------------------------|---------------------------------------------------------------------------------------------------------------------------------------|
|            |                                                | allocation. A designated research staff member who is not involved in follow-up data collection or data analysis will carry out randomization using a computerized program. (Ma 2010)<br>The trial design precluded blinding participants or interventionists to treatment assignment; however, the investigators, Data and Safety Monitoring Board members, outcome assessors, and data analyst were masked throughout the trial. Ma 2015 |                                                       |                                                                                                                                                                                                                         |                                                                                                                                       |
| <b>126</b> | <b>Manning 1994</b>                            | UNCLEAR                                                                                                                                                                                                                                                                                                                                                                                                                                    | UNCLEAR                                               | LOW                                                                                                                                                                                                                     | LOW                                                                                                                                   |
|            | Assessment justification:                      | NS                                                                                                                                                                                                                                                                                                                                                                                                                                         | NS                                                    | “Weight measurements were available irrespective of whether the patient completed the defined study group, scale weights were comparable throughout.”                                                                   | Less than 50% attrition at 12- and 48-month follow-up.                                                                                |
| <b>127</b> | <b>Manzoni 2016</b>                            | LOW                                                                                                                                                                                                                                                                                                                                                                                                                                        | UNCLEAR                                               | HIGH                                                                                                                                                                                                                    | HIGH                                                                                                                                  |
|            | Assessment justification:                      | Authors only mention that the randomization scheme used for selecting the condition was generated by using the Web site www.randomization.com. However, no further information regarding the sequence generation is offered.                                                                                                                                                                                                               | NS                                                    | Participants’ data were obtained 1 week after the start of the inpatient program, during the last week of hospitalization, and at 1-year follow-up (by postal mail) (LOW). Data at follow-up were self-reported (HIGH). | Control 29/52 at follow up (55.7%) LOW<br>CBT 38/54 at follow up (70%) LOW<br>VR 46/57 at follow up (80.7%) LOW<br>Between group HIGH |
| <b>128</b> | <b>Marniemi 1990</b>                           | UNCLEAR                                                                                                                                                                                                                                                                                                                                                                                                                                    | UNCLEAR                                               | UNCLEAR                                                                                                                                                                                                                 | UNCLEAR                                                                                                                               |
|            | Assessment justification:                      | NS                                                                                                                                                                                                                                                                                                                                                                                                                                         | NS                                                    | NS                                                                                                                                                                                                                      | All participant data used in the analysis but it's unclear how many were lost to follow-up.                                           |
| <b>129</b> | <b>Martin 2008</b>                             | UNCLEAR                                                                                                                                                                                                                                                                                                                                                                                                                                    | UNCLEAR                                               | LOW                                                                                                                                                                                                                     | HIGH                                                                                                                                  |

| Study ID |                           | Random sequence generation<br>(Selection bias)                                                                                                                                                                                                                                                                                                                                                                                                                                                                                                                                                                                                                                                                                                                                                                                                                                                                                                                                                                                                     | Allocation concealment<br>(Selection bias) | Blinding of outcome<br>assessment<br>(Detection bias)                                                                                                                          | Incomplete outcome data<br>(Attrition bias)                                                                                                                                                                                                                                                                                                                                                                                                                                                                                                                                                                                                                                                                                                                                                                                                                                                                                                                                                                                                | Other bias |
|----------|---------------------------|----------------------------------------------------------------------------------------------------------------------------------------------------------------------------------------------------------------------------------------------------------------------------------------------------------------------------------------------------------------------------------------------------------------------------------------------------------------------------------------------------------------------------------------------------------------------------------------------------------------------------------------------------------------------------------------------------------------------------------------------------------------------------------------------------------------------------------------------------------------------------------------------------------------------------------------------------------------------------------------------------------------------------------------------------|--------------------------------------------|--------------------------------------------------------------------------------------------------------------------------------------------------------------------------------|--------------------------------------------------------------------------------------------------------------------------------------------------------------------------------------------------------------------------------------------------------------------------------------------------------------------------------------------------------------------------------------------------------------------------------------------------------------------------------------------------------------------------------------------------------------------------------------------------------------------------------------------------------------------------------------------------------------------------------------------------------------------------------------------------------------------------------------------------------------------------------------------------------------------------------------------------------------------------------------------------------------------------------------------|------------|
|          | Assessment justification: | <p>“Eight physicians practicing at two clinics were randomly assigned to provide one of the two treatment conditions, with four physicians providing personalized weight loss interventions and four providing standard care treatment (two intervention and two control at each clinic). Specifically, the randomization utilized clinic as a stratification variable, and the practices within each stratum were assigned to level of treatment under a balanced randomization. The basis of the randomization was the within-stratum ranks of a uniform (0,1) (pseudo-) random deviate generated for each participating physician. This resulted in a nested design, with participants recruited for the study being identified with the randomization assignment of their primary care physician. The purpose of using a nested design was to reduce the likelihood of treatment contamination in the control subjects, and for this reason, only the intervention physicians were trained in the use of the active treatment components.”</p> | NS                                         | Trained personnel measured participants’ weight and height at each assessment in the physician’s office using a standardized protocol with a calibrated scale and stadiometer. | <p>Completed 6mth programme 106/144 (or 106/137 as 7 become not eligible).<br/>At 6mths Standard care: 58/73 (or 58/69) LOW<br/>At 6 mths Intervention: 48/71 (or 48/68) LOW<br/>'After accounting for medical exclusions and women lost to follow-up for other reasons, 105 completed the 6-month program, which resulted in an attrition rate of 27%. Another 42 participants discontinued the study by month 9, 51 discontinued by month 12, and 53 discontinued by month 18. Thus, the attrition rates at the 9-month, 12-month, and 18-month follow-up assessments were 29, 35, and 37%, respectively. Comparing between the two treatment groups, attrition was significantly greater (29%) in the intervention group immediately following the active treatment phase (i.e., month 6) as compared with standard care (12%), <math>P &lt; 0.01</math>. Attrition was also greater among intervention participants (44%) at the final follow-up (i.e., month 18) as compared with standard care (23%), <math>P &lt; 0.02</math>.'</p> |            |
| 130      | Mefferd 2007              | UNCLEAR                                                                                                                                                                                                                                                                                                                                                                                                                                                                                                                                                                                                                                                                                                                                                                                                                                                                                                                                                                                                                                            | UNCLEAR                                    | LOW                                                                                                                                                                            | LOW                                                                                                                                                                                                                                                                                                                                                                                                                                                                                                                                                                                                                                                                                                                                                                                                                                                                                                                                                                                                                                        | UNCLEAR    |

| Study ID   |                           | Random sequence generation<br>(Selection bias)                                                                                                                                        | Allocation concealment<br>(Selection bias)                                                                                                                                             | Blinding of outcome<br>assessment<br>(Detection bias)                                                                                                                                                                                                                                                                                      | Incomplete outcome data<br>(Attrition bias)                                                                                                                                                                                                                                                                                                                                                                                                                                                                           | Other bias                                                                                 |
|------------|---------------------------|---------------------------------------------------------------------------------------------------------------------------------------------------------------------------------------|----------------------------------------------------------------------------------------------------------------------------------------------------------------------------------------|--------------------------------------------------------------------------------------------------------------------------------------------------------------------------------------------------------------------------------------------------------------------------------------------------------------------------------------------|-----------------------------------------------------------------------------------------------------------------------------------------------------------------------------------------------------------------------------------------------------------------------------------------------------------------------------------------------------------------------------------------------------------------------------------------------------------------------------------------------------------------------|--------------------------------------------------------------------------------------------|
|            | Assessment justification: | NS                                                                                                                                                                                    | NS                                                                                                                                                                                     | "Anthropometric measurements (obtained at baseline and 16 weeks) included height and weight (measured without shoes)..."                                                                                                                                                                                                                   | A little over ten percent of the participants dropped out of the study during the 16 weeks under analysis in this report, yielding a final sample size of (n = 76) at 16 weeks. All nine dropouts had been assigned to the intervention group.<br><br>Retention rate:<br>16-weeks:<br>Control: 100%; Intervention:<br>47/56*100= 83.9%<br>12-Months:<br>Control: 25/29*100 = 86%;<br>Intervention: 44/56*100 = 78.6%                                                                                                  | Wait-list control; unclear if control group participants were aware they were wait-listed. |
| <b>131</b> | <b>Melchart 2017</b>      | LOW                                                                                                                                                                                   | LOW                                                                                                                                                                                    | LOW                                                                                                                                                                                                                                                                                                                                        | LOW                                                                                                                                                                                                                                                                                                                                                                                                                                                                                                                   |                                                                                            |
|            | Assessment justification: | "Randomization and allocation envelopes were prepared by an independent statistician at the Institute for Medical Statistics and Epidemiology at the Technical University of Munich." | "The trial physicians were instructed to open the sealed envelopes in a strictly sequential order of enrollment and to disclose the allocated treatment arm to the study participant." | "Body weight, height, waist circumference, blood pressure, and heart rates were measured by certified IHM coaches at each of the five examination visits. The teams were trained to perform the examinations in a standardized way (eg, subjects wearing light clothes and no shoes, with use of calibrated scales for measuring weight)." | "... Of 111 subjects who commenced with the IHM group, 17 (15.3%) prematurely discontinued the study, while in the UC group the dropout rate was 18.2% (10 of 55). The majority of dropouts left the study before the control visit at month 3, and this occurred in 10 of 17 cases in the IHM group and in 9 of 10 in the UC group."<br><br>Participant dropouts:<br>3-Months:<br>IHM: 90.8%; UC: 84%;<br>6-Months:<br>IHM: 88.1%; UC: 82%;<br>9-Months:<br>IHM: 85.3%; UC: 82%<br>12-Months:<br>IHM: 84.4%; UC: 84% |                                                                                            |
| <b>132</b> | <b>Melin 2003</b>         | UNCLEAR                                                                                                                                                                               | UNCLEAR                                                                                                                                                                                | LOW                                                                                                                                                                                                                                                                                                                                        | LOW                                                                                                                                                                                                                                                                                                                                                                                                                                                                                                                   |                                                                                            |

| Study ID |                           | Random sequence generation<br>(Selection bias)                                                                                                                                                                                    | Allocation concealment<br>(Selection bias) | Blinding of outcome<br>assessment<br>(Detection bias)                                                                                                                                                                                                                                                                                                                                                                                                                                                                                                                                                                                               | Incomplete outcome data<br>(Attrition bias)                                                                                                                                   | Other bias                                                                                                                                                                                                                                                                                                                                        |
|----------|---------------------------|-----------------------------------------------------------------------------------------------------------------------------------------------------------------------------------------------------------------------------------|--------------------------------------------|-----------------------------------------------------------------------------------------------------------------------------------------------------------------------------------------------------------------------------------------------------------------------------------------------------------------------------------------------------------------------------------------------------------------------------------------------------------------------------------------------------------------------------------------------------------------------------------------------------------------------------------------------------|-------------------------------------------------------------------------------------------------------------------------------------------------------------------------------|---------------------------------------------------------------------------------------------------------------------------------------------------------------------------------------------------------------------------------------------------------------------------------------------------------------------------------------------------|
|          | Assessment justification: | <p>“The subjects were randomised into two groups according to gender, age and BMI: an intensively treated group (group 1) and a less intensively treated group (group 2.)”</p> <p>No further information given.</p>               | NS                                         | <p>Weight objectively measured.</p> <p>The laboratory tests were performed according to clinical routine. Blood glucose concentrations were determined by the glucose oxidase method.<sup>12</sup> Serum insulin assays were performed by the Phadebas test (Pharmacia, Uppsala, Sweden).<sup>12</sup> The blood pressure was measured in the right arm with a sphygmomanometer. The cuff size was 15.45 cm depending on the arm circumference. The recordings were made to the nearest 2 mmHg twice after 10 min supine rest, and the mean of the two measurements was used in the analyses.</p>                                                   | <p>Less intensive group: 19/21 at 6mths;<br/>18/21 at 12mths;<br/>15/21 at 24mths.</p> <p>More Intensive group: 19/22 at 6mths;<br/>17/22 at 12mths;<br/>17/22 at 24mths.</p> |                                                                                                                                                                                                                                                                                                                                                   |
| 133      | Menard 2005               | LOW                                                                                                                                                                                                                               | UNCLEAR                                    | LOW                                                                                                                                                                                                                                                                                                                                                                                                                                                                                                                                                                                                                                                 | LOW                                                                                                                                                                           | UNCLEAR                                                                                                                                                                                                                                                                                                                                           |
|          |                           | <p>“Using a blocked randomization (n = 4) stratified by hemoglobin A1c value (&lt; 10% and ≥ 10%), patients were assigned by an independent person using a computer program to receive intensive multitherapy or usual care.”</p> | NS                                         | <p>“Fasting plasma glucose levels, hemoglobin A1c concentrations, blood pressure and serum lipoprotein levels were measured after a 12-hour, overnight fast at baseline and at 6, 12 and 18 months. Weight and height were measured, and body mass index (kg/m<sup>2</sup>) was calculated. Fasting plasma glucose levels were measured using a glucose oxidase method. Cholesterol, high-density lipoprotein cholesterol, and triglyceride levels were measured using a colorimetric process (Johnson &amp; Johnson Ortho-Clinical Diagnostics, Rochester, NY). Low-density lipoprotein cholesterol levels were calculated with the Friedewald</p> | <p>Control:<br/>35/36 at 12mths;<br/>29/36 at 18mths.</p> <p>intervention:<br/>34/36 at 12mths;<br/>32/36 at 18mths.</p>                                                      | <p>For ethical reasons, patients in the control group had protocol-driven laboratory tests, and they and their physicians received information about diabetes and its management as well as the results of these tests. Thus, control group patients may have received more aggressive treatment and attention than they normally would have.</p> |

| Study ID   | Random sequence generation<br>(Selection bias) | Allocation concealment<br>(Selection bias)                                                                                                                                                                                                                                                                                                        | Blinding of outcome<br>assessment<br>(Detection bias)                                                                                                                                                                                                                                                                                                           | Incomplete outcome data<br>(Attrition bias)                                                                                                                                                                                                                                                                                                                                                                                                                                                                                                                  | Other bias                                                                                                                                                                                                            |
|------------|------------------------------------------------|---------------------------------------------------------------------------------------------------------------------------------------------------------------------------------------------------------------------------------------------------------------------------------------------------------------------------------------------------|-----------------------------------------------------------------------------------------------------------------------------------------------------------------------------------------------------------------------------------------------------------------------------------------------------------------------------------------------------------------|--------------------------------------------------------------------------------------------------------------------------------------------------------------------------------------------------------------------------------------------------------------------------------------------------------------------------------------------------------------------------------------------------------------------------------------------------------------------------------------------------------------------------------------------------------------|-----------------------------------------------------------------------------------------------------------------------------------------------------------------------------------------------------------------------|
|            |                                                |                                                                                                                                                                                                                                                                                                                                                   | formula. Hemoglobin A1c concentrations were measured by high-performance liquid chromatography (Bio-Rad VARIANT, Hercules, Calif.)”                                                                                                                                                                                                                             |                                                                                                                                                                                                                                                                                                                                                                                                                                                                                                                                                              |                                                                                                                                                                                                                       |
| <b>134</b> | <b>Mengham 1999</b>                            | UNCLEAR                                                                                                                                                                                                                                                                                                                                           | UNCLEAR                                                                                                                                                                                                                                                                                                                                                         | UNCLEAR                                                                                                                                                                                                                                                                                                                                                                                                                                                                                                                                                      | LOW                                                                                                                                                                                                                   |
|            | Assessment justification:                      | NS                                                                                                                                                                                                                                                                                                                                                | NS                                                                                                                                                                                                                                                                                                                                                              | NS                                                                                                                                                                                                                                                                                                                                                                                                                                                                                                                                                           | 74/75 LOW<br>'Seventy-five patients were recruited and randomised. '<br>'Of the 74 patients who completed the study'                                                                                                  |
| <b>135</b> | <b>Mensinger 2016</b>                          | LOW                                                                                                                                                                                                                                                                                                                                               | LOW                                                                                                                                                                                                                                                                                                                                                             | LOW                                                                                                                                                                                                                                                                                                                                                                                                                                                                                                                                                          | HIGH                                                                                                                                                                                                                  |
|            | Assessment justification:                      | “This study was a 1:1 parallel-group randomized design comparing the effectiveness of two 6-month group-based “healthy living programs” (weight-neutral or weight-loss).<br>Folded index cards containing program assignments from a computer-generated randomization scheme were placed into sealed and sequentially numbered opaque envelopes.” | “Folded index cards containing program assignments from a computer-generated randomization scheme were placed into sealed and sequentially numbered opaque envelopes. Upon completion of the baseline assessments where informed consent was obtained, participants were given an envelope containing a welcome letter with their assignment and instructions.” | Weight measured objectively.<br>Waist and hip circumference was measured to the nearest quarter inch with a flexible tape measure on bare skin.<br>Venous blood samples were drawn after an overnight fast in order to obtain glucose levels and lipid panels (total cholesterol, LDL-C, HDL-C, total cholesterol-HDL ratio, and triglycerides). We followed standardized methods established by the National High Blood Pressure Education Program and averaged two blood pressure (BP) readings using a Welch Allyn cuff with an aneroid sphygmomanometer. | Weight neutral - 39/40 at 6mths (LOW); 19/40 at 24mths (HIGH)<br>weight loss - 33/40 at 6mths (LOW); 21/40 at 6mths (LOW).<br><br>Attrition rate at 6-month for the weight loss group > 25%, change from low to high. |
| <b>136</b> | <b>Messier 2013</b>                            | LOW                                                                                                                                                                                                                                                                                                                                               | UNCLEAR                                                                                                                                                                                                                                                                                                                                                         | LOW                                                                                                                                                                                                                                                                                                                                                                                                                                                                                                                                                          | LOW                                                                                                                                                                                                                   |

| Study ID   |                           | Random sequence generation<br>(Selection bias)                                                                                                                                                                | Allocation concealment<br>(Selection bias)                                                                               | Blinding of outcome<br>assessment<br>(Detection bias)                                                                                                                                            | Incomplete outcome data<br>(Attrition bias)                                                                                                                                        | Other bias |
|------------|---------------------------|---------------------------------------------------------------------------------------------------------------------------------------------------------------------------------------------------------------|--------------------------------------------------------------------------------------------------------------------------|--------------------------------------------------------------------------------------------------------------------------------------------------------------------------------------------------|------------------------------------------------------------------------------------------------------------------------------------------------------------------------------------|------------|
|            | Assessment justification: | "A stratified-block randomization method was used to assign all eligible persons to 1 of the 3 intervention groups, stratified by BMI and sex."                                                               | NS                                                                                                                       | Weight, height, and BMI were obtained at baseline, 6months, and 18months using standard techniques.                                                                                              | "Of the 454 participants, 399 (88%) completed the study (returned for 18- month follow-up). Retention did not differ significantly among the groups (E, 89%; D, 85%; D+E, 89%)..." |            |
| <b>137</b> | <b>Miller 2002</b>        | LOW                                                                                                                                                                                                           | LOW                                                                                                                      | LOW                                                                                                                                                                                              | LOW                                                                                                                                                                                |            |
|            | Assessment justification: | Randomization was stratified by race (African American and other), with an allocation ratio of 1:1 and a block size of 4. The order of randomization was constructed from a published list of random numbers; | assignments were issued by the study coordinator who opened sealed opaque envelopes that contained the group assignment. | Weight was measured biweekly by blinded personnel using a certified balance-beam scale.                                                                                                          | Less than 50% attrition at 12-months follow-up.                                                                                                                                    |            |
| <b>138</b> | <b>Mitsui 2008</b>        | UNCLEAR                                                                                                                                                                                                       | UNCLEAR                                                                                                                  | UNCLEAR                                                                                                                                                                                          | LOW                                                                                                                                                                                |            |
|            | Assessment justification: | "...were randomly assigned to the intervention group..."                                                                                                                                                      | NS                                                                                                                       | NS                                                                                                                                                                                               | "Two participants in the intervention group and 1 in the control group dropped out of the program after week 12 for personal reasons."                                             |            |
| <b>139</b> | <b>Molenaar 2010</b>      | LOW                                                                                                                                                                                                           | UNCLEAR                                                                                                                  | LOW                                                                                                                                                                                              | LOW                                                                                                                                                                                |            |
|            | Assessment justification: | Computerized randomization                                                                                                                                                                                    | NS                                                                                                                       | Weight objectively measured.                                                                                                                                                                     | Twenty-four participants (18%) did not complete the 6-month intensive intervention period and an additional nine participants (7%) dropped out during the 6-month follow-up period |            |
| <b>140</b> | <b>Moreno 2014</b>        | UNCLEAR                                                                                                                                                                                                       | UNCLEAR                                                                                                                  | LOW                                                                                                                                                                                              | LOW                                                                                                                                                                                |            |
|            | Assessment justification: | "Patients were randomised and allocated to receive ... "                                                                                                                                                      | NS                                                                                                                       | Weight measured objectively. WC was recorded with a standard flexible nonelastic metric tape over the midpoint between the last rib and the iliac crest, with the patient standing and exhaling. | At 12-months:<br>LC: 26/40<br>VLCK: 27/39<br>At 24-months:<br>LC: 23/40<br>VLCK: 22/39                                                                                             |            |
| <b>141</b> | <b>Morgan 2010</b>        | LOW                                                                                                                                                                                                           | LOW                                                                                                                      | LOW                                                                                                                                                                                              | LOW                                                                                                                                                                                |            |

| Study ID   |                           | Random sequence generation<br>(Selection bias)                                                                                                                                                               | Allocation concealment<br>(Selection bias)                                                                                                                                                                                                                                                | Blinding of outcome<br>assessment<br>(Detection bias)                                                                                                                                                                                                                                                                                      | Incomplete outcome data<br>(Attrition bias)                                                                                                                                                                                                                                                                                                                                                                                                                                                                                                                                                                                                                                                                                | Other bias |
|------------|---------------------------|--------------------------------------------------------------------------------------------------------------------------------------------------------------------------------------------------------------|-------------------------------------------------------------------------------------------------------------------------------------------------------------------------------------------------------------------------------------------------------------------------------------------|--------------------------------------------------------------------------------------------------------------------------------------------------------------------------------------------------------------------------------------------------------------------------------------------------------------------------------------------|----------------------------------------------------------------------------------------------------------------------------------------------------------------------------------------------------------------------------------------------------------------------------------------------------------------------------------------------------------------------------------------------------------------------------------------------------------------------------------------------------------------------------------------------------------------------------------------------------------------------------------------------------------------------------------------------------------------------------|------------|
|            | Assessment justification: | "The random allocation sequence was generated by a computer-based random number-producing algorithm in block lengths of six to ensure an equal chance of allocation to each group."                          | "To ensure concealment, the sequence was generated by a statistician and given to the project manager. Randomization was completed by a research assistant who was not involved in the assessment of participants and the allocation sequence was concealed when enrolling participants." | "Weight was measured without shoes on a digital scale to 0.1kg (model CH-150 kp; A&D Mercury, Adelaide, Australia)"<br><br>Systolic and diastolic blood pressure and resting heart rate were measured using a NISSEI/DS-105E digital electronic blood pressure monitor (Nihon Seimitsu Sokki, Gunma, Japan) under standardized procedures. | Retention rate:<br>3-month follow-up: Control: 27/31*100 = 87.1%;<br>SHED-IT: 28/34*100 = 82.4%<br><br>6-month follow-up: Control: 26/31*100 = 83.9%;<br>SHED-IT: 28/34*100 = 82.4%<br><br>12-month follow-up: Control: 20/31*100 = 64.5%;<br>SHED-IT: 26/34*100 = 76.5%                                                                                                                                                                                                                                                                                                                                                                                                                                                   |            |
| <b>142</b> | <b>Muggia 2014</b>        | LOW                                                                                                                                                                                                          | LOW                                                                                                                                                                                                                                                                                       | UNCLEAR                                                                                                                                                                                                                                                                                                                                    | HIGH                                                                                                                                                                                                                                                                                                                                                                                                                                                                                                                                                                                                                                                                                                                       |            |
|            | Assessment justification: | "Participants were randomly allocated (allocation ratio 1:1) to the standard care or cognitive behavioral therapy group, using a computer-generated randomization application of STATA statistical package." | "Randomization list was kept at Biometric Unit and clinicians were unaware of the treatment group until the subjects were enrolled. The treatment allocation was communicated by phone to the clinician every time a new patient was enrolled."                                           | Information on how weight was measured not stated.                                                                                                                                                                                                                                                                                         | A high attrition rate is observed and although multiple imputations are performed to reduce its impact bias, this cannot be excluded as also reported in similar studies. At the six month, 114 patients (69.9% of the total) attended the follow-up visit, with an attrition rate of 30.1%. The percentage of visits attended was significantly greater in group A (83.3% vs 70.4% in group B, p < 0.001). At the 12 month, 78 patients (47.8% of the total) attended the follow-up visit, with an attrition rate at 1 year of 47.8 per 100 person-year. A total of 44 patients in the treatment arm A (53.0%) and 34 (42.5%) in group B completed the follow-up, with no significant differences between the two groups. |            |
| <b>143</b> | <b>Munsch 2003</b>        | UNCLEAR                                                                                                                                                                                                      | UNCLEAR                                                                                                                                                                                                                                                                                   | UNCLEAR                                                                                                                                                                                                                                                                                                                                    | HIGH                                                                                                                                                                                                                                                                                                                                                                                                                                                                                                                                                                                                                                                                                                                       |            |



| Study ID   |                           | Random sequence generation<br>(Selection bias)                                                    | Allocation concealment<br>(Selection bias) | Blinding of outcome<br>assessment<br>(Detection bias)                                                                     | Incomplete outcome data<br>(Attrition bias)                                                                                                                                                                                                                                                                                                                                                                                                                                                                                                                                                                                                                                                                                                               | Other bias |
|------------|---------------------------|---------------------------------------------------------------------------------------------------|--------------------------------------------|---------------------------------------------------------------------------------------------------------------------------|-----------------------------------------------------------------------------------------------------------------------------------------------------------------------------------------------------------------------------------------------------------------------------------------------------------------------------------------------------------------------------------------------------------------------------------------------------------------------------------------------------------------------------------------------------------------------------------------------------------------------------------------------------------------------------------------------------------------------------------------------------------|------------|
|            | Assessment justification: | NS                                                                                                | NS                                         | "During the investigation the BMI (kg/m2) was recorded at the start, end and 12 months after completion of treatment."    | "The dropout rate until the end treatment was 23%, 29% and 37% in the GP BASEL, the GP control and in the Clinic BASEL groups, respectively. This resulted in a distorted ratio between BASEL treated and control subjects (ratio: almost 3:1; aimed ratio: 3:2). The dropout rate between the end of treatment and the 1-year follow up was 0%, 33% and 52% in the GP BASEL, the GP control and in the Clinic BASEL groups, respectively."                                                                                                                                                                                                                                                                                                               |            |
| <b>144</b> | <b>Munsch 2007</b>        | LOW                                                                                               | UNCLEAR                                    | LOW                                                                                                                       | LOW                                                                                                                                                                                                                                                                                                                                                                                                                                                                                                                                                                                                                                                                                                                                                       |            |
|            | Assessment justification: | "Following diagnostic interviews, patients were randomized according to a permuted block design." | NS                                         | "Weight and height were measured on a Seca electronic balance scale (Seca, Vogel p Halke, Germany) and by a stadiometer." | "Twenty-two participants (27.5%) dropped out during treatment: 13 (29.5%) in CBT and 9 (25.0%) in BWLT. During follow-up 3 participants withdrew from CBT and 4 from BWLT. There were no significant differences in dropout rates between the two treatment conditions between baseline and 12-month follow-up."<br>"A final follow-up measurement took place on average 307.5 weeks (median ¼ 314.5, SD ¼ 46.9, MIN ¼ 217, MAX ¼ 373), i.e. c. 6 years, after the active treatment had ended. To this end, all patients attending at least one session of active treatment were again contacted. Of the initial 44 patients allocated to the CBT condition and the 36 patients allocated to the BWLT condition, 26 (59%) in the CBT, and 26 (72%) in the |            |

| Study ID   | Random sequence generation<br>(Selection bias) | Allocation concealment<br>(Selection bias)                                                                                                                                                                                                                                                                                                                                                                                                                                                  | Blinding of outcome<br>assessment<br>(Detection bias)                                                                                                                                                                                 | Incomplete outcome data<br>(Attrition bias)                                                                                                                                                                                                                                                                                                   | Other bias                                                                                                                                                                                               |                                                                                                                                                                               |
|------------|------------------------------------------------|---------------------------------------------------------------------------------------------------------------------------------------------------------------------------------------------------------------------------------------------------------------------------------------------------------------------------------------------------------------------------------------------------------------------------------------------------------------------------------------------|---------------------------------------------------------------------------------------------------------------------------------------------------------------------------------------------------------------------------------------|-----------------------------------------------------------------------------------------------------------------------------------------------------------------------------------------------------------------------------------------------------------------------------------------------------------------------------------------------|----------------------------------------------------------------------------------------------------------------------------------------------------------------------------------------------------------|-------------------------------------------------------------------------------------------------------------------------------------------------------------------------------|
|            |                                                |                                                                                                                                                                                                                                                                                                                                                                                                                                                                                             |                                                                                                                                                                                                                                       | BWLT took part in the 6-year follow-up assessments."                                                                                                                                                                                                                                                                                          |                                                                                                                                                                                                          |                                                                                                                                                                               |
| <b>145</b> | <b>Murphy 1982</b>                             | UNCLEAR                                                                                                                                                                                                                                                                                                                                                                                                                                                                                     | UNCLEAR                                                                                                                                                                                                                               | UNCLEAR                                                                                                                                                                                                                                                                                                                                       |                                                                                                                                                                                                          |                                                                                                                                                                               |
|            | Assessment justification:                      | NS                                                                                                                                                                                                                                                                                                                                                                                                                                                                                          | NS                                                                                                                                                                                                                                    | NS                                                                                                                                                                                                                                                                                                                                            | "Excluding those subjects who dropped out before the first treatment session, the attrition rate through the end of treatment was 40%"                                                                   |                                                                                                                                                                               |
| <b>146</b> | <b>Nakata 2014</b>                             | LOW                                                                                                                                                                                                                                                                                                                                                                                                                                                                                         | LOW                                                                                                                                                                                                                                   | LOW                                                                                                                                                                                                                                                                                                                                           | UNCLEAR                                                                                                                                                                                                  |                                                                                                                                                                               |
|            | Assessment justification:                      | " After the motivational lecture, the participants were randomly assigned to one of the 3 groups using simple randomisation procedures involving computerised random numbers."                                                                                                                                                                                                                                                                                                              | "The allocation data were generated by an investigator (MO) who had no contact with the participants or other staff members, and the data were maintained at a central secure location until completion of the motivational lecture." | "Data were collected at baseline and at months 3, 6, 18 and 30 in the hospital by trained hospital staff members who were blinded to the treatment assignment process. The primary outcome measure was the amount of weight lost from baseline to 30 months."                                                                                 | The attrition rates were 9.6% (12/125) and 20.0% (25/125) at months 18 and 30, respectively (Fig. 1). The numbers of individuals lost to follow-up at 30 months were similar in both groups (p = 0.531). | "Due to ethical concerns, we provided group-based support to the control group after the 6-month intervention period and did not include them in the follow-up measurements." |
| <b>147</b> | <b>Nanchahal 2012</b>                          | LOW                                                                                                                                                                                                                                                                                                                                                                                                                                                                                         | UNCLEAR                                                                                                                                                                                                                               | LOW                                                                                                                                                                                                                                                                                                                                           | LOW                                                                                                                                                                                                      |                                                                                                                                                                               |
|            | Assessment justification:                      | "Participants were randomly allocated (allocation ratio 1:1) to the control or intervention group (TP, EH, AS), using a computer-generated randomisation application written in VBA for MS Access (TP). The Taves method of minimisation 48 was used to ensure the groups were balanced for general practice, gender, age group ( $\leq 50 / > 50$ years), BMI category ( $\leq 30 / > 30$ kg/m <sup>2</sup> ), diagnosis of diabetes (yes/no) and taking antipsychotic medication or not." | NS                                                                                                                                                                                                                                    | The study was single blinded with members of the study team assessing baseline and follow-up measurements blinded to group assignment.<br><br>Weight (in light clothing) was measured using the Tanita (BC 420 MA) scales. The scales also reported per cent body fat, basal metabolic rate and metabolic age (age expected for a given value | Retention rate:<br>6-months (step change in intervention intensity): Control: 67.9%; CAMWEL: 70.2%<br><br>12-months:<br>Control: 60.0%; CAMWEL: 53.9%                                                    |                                                                                                                                                                               |

| Study ID   |                           | Random sequence generation<br>(Selection bias)                                                                                                            | Allocation concealment<br>(Selection bias) | Blinding of outcome<br>assessment<br>(Detection bias)                                                                                                                                                                                                                                    | Incomplete outcome data<br>(Attrition bias)                                                                                                                                                                                                                                                                                                                                          | Other bias |
|------------|---------------------------|-----------------------------------------------------------------------------------------------------------------------------------------------------------|--------------------------------------------|------------------------------------------------------------------------------------------------------------------------------------------------------------------------------------------------------------------------------------------------------------------------------------------|--------------------------------------------------------------------------------------------------------------------------------------------------------------------------------------------------------------------------------------------------------------------------------------------------------------------------------------------------------------------------------------|------------|
|            |                           |                                                                                                                                                           |                                            | of basal metabolic rate). Waist was measured midway between the iliac crest and the costal margin to the nearest 0.1 cm. Blood pressure and heart rate were measured using a digital automatic monitor (Omron Model M10-IT), with the average of three readings recorded where possible. |                                                                                                                                                                                                                                                                                                                                                                                      |            |
| <b>148</b> | <b>Ng 2015</b>            | LOW                                                                                                                                                       | UNCLEAR                                    | LOW                                                                                                                                                                                                                                                                                      | LOW                                                                                                                                                                                                                                                                                                                                                                                  |            |
|            | Assessment justification: | “Recruited patients were randomized in 1:1 ratio to participate in the LMP or usual care through the use of a computer-generated list of random numbers.” | NS                                         | "Anthropometric measurements, ESS, and laboratory tests, which included liver and renal function, fasting glucose, and lipids, were performed at baseline, 4 months, and 12 months."                                                                                                     | "Sixteen participants in the intervention group were excluded after randomization, as six had never attended dietician visits, seven attended fewer than four dietician visits, and three maintained their high-energy and -fat food intake. There were six subjects in the control group lost to follow-up."<br><br>LMP Group:<br>45/61*100 = 73.8%;<br>Control:<br>37/43*100 = 86% |            |
| <b>149</b> | <b>Nicklas 2004</b>       | LOW                                                                                                                                                       | UNCLEAR                                    | LOW                                                                                                                                                                                                                                                                                      | LOW                                                                                                                                                                                                                                                                                                                                                                                  |            |

| Study ID   |                           | Random sequence generation<br>(Selection bias)                                                                                                                                                                                                                                                                   | Allocation concealment<br>(Selection bias)                                                                                             | Blinding of outcome<br>assessment<br>(Detection bias)                                                                                                                                                                  | Incomplete outcome data<br>(Attrition bias)                                                                                                                                                                                                                                                                                                                                                                                                                                                                                                                                                                                                                                                                                        | Other bias |
|------------|---------------------------|------------------------------------------------------------------------------------------------------------------------------------------------------------------------------------------------------------------------------------------------------------------------------------------------------------------|----------------------------------------------------------------------------------------------------------------------------------------|------------------------------------------------------------------------------------------------------------------------------------------------------------------------------------------------------------------------|------------------------------------------------------------------------------------------------------------------------------------------------------------------------------------------------------------------------------------------------------------------------------------------------------------------------------------------------------------------------------------------------------------------------------------------------------------------------------------------------------------------------------------------------------------------------------------------------------------------------------------------------------------------------------------------------------------------------------------|------------|
|            | Assessment justification: | "A variable-block randomization method was used to assign all eligible persons to 1 of the 4 intervention arms, stratified by race (white versus nonwhite). A list of random assignments to the 4 groups was computer-generated within each stratum, with blocks of 4, 8, and 12 chosen with equal probability." | "Once a subject met the eligibility criteria, a computer program displayed the next group assignment and logged it into the database." | "Each subject's weight (without shoes) was measured at baseline and at the 6-month and 18-month followup visits, using the same calibrated scale. Measurement at each session was scheduled for the same time of day." | "Of the 316 randomized participants, 252 (80%) completed the study (returned for the final data collection visit)."<br>"Retention of participants was not significantly different between the 4 groups (for healthy lifestyle, 86%; for diet only, 77%; for exercise only, 80%; for diet plus exercise, 76%)."<br>"Retention of participants was not significantly different between the 4 groups (for healthy lifestyle, 86%; for diet only, 77%; for exercise only, 80%; for diet plus exercise, 76%)"<br>Attrition rate:<br>6 Month: Healthy lifestyle: 89.7%; Exercise only: 87.5%; Diet only: 87.8; Diet plus exercise: 82.9%<br>18 Month: Healthy lifestyle: 86%; Exercise only: 80%; Diet only: 77; Diet plus exercise: 76% |            |
| <b>150</b> | <b>Nicklas 2009</b>       | LOW                                                                                                                                                                                                                                                                                                              | UNCLEAR                                                                                                                                | LOW                                                                                                                                                                                                                    | LOW                                                                                                                                                                                                                                                                                                                                                                                                                                                                                                                                                                                                                                                                                                                                |            |
|            | Assessment justification: | "A total of 112 women met all study criteria and were randomly assigned (before baseline assessments) to 1 of the 3 interventions (Figure 1) by random number generation."                                                                                                                                       | NS                                                                                                                                     | Staff that measured the primary (abdominal visceral fat volume) and secondary (CVD risk factors) outcomes were blinded to group assignment.                                                                            | Post-intervention:<br>CR only: 73%;<br>CR + Mod: 70%;<br>CR + Vigorous: 71%<br><br>6-month:<br>CR only: 67.6%;<br>CR + Mod: 72.5%; CR + Vigorous: 68.4%<br><br>12-month:<br>CR only: 58.8%;<br>CR + Mod: 67.5%;<br>CR + Vigorous: 68%                                                                                                                                                                                                                                                                                                                                                                                                                                                                                              |            |
| <b>151</b> | <b>Nilsen 2011</b>        | LOW                                                                                                                                                                                                                                                                                                              | LOW                                                                                                                                    | LOW                                                                                                                                                                                                                    | LOW                                                                                                                                                                                                                                                                                                                                                                                                                                                                                                                                                                                                                                                                                                                                |            |

| Study ID   | Random sequence generation<br>(Selection bias)                                                                                                                                                                      | Allocation concealment<br>(Selection bias)                                  | Blinding of outcome<br>assessment<br>(Detection bias)                                                                                                                                                                                                                                                                                                                                                                                                                                            | Incomplete outcome data<br>(Attrition bias)                                                                                                                                                                                                                                                                                                               | Other bias |
|------------|---------------------------------------------------------------------------------------------------------------------------------------------------------------------------------------------------------------------|-----------------------------------------------------------------------------|--------------------------------------------------------------------------------------------------------------------------------------------------------------------------------------------------------------------------------------------------------------------------------------------------------------------------------------------------------------------------------------------------------------------------------------------------------------------------------------------------|-----------------------------------------------------------------------------------------------------------------------------------------------------------------------------------------------------------------------------------------------------------------------------------------------------------------------------------------------------------|------------|
|            | Assessment justification:<br>Groups were randomly assigned to an "individual physician group" (IG) or an "individual plus interdisciplinary group" (IIG) by use of closed envelope method with unknown block sizes. | Closed envelope method.                                                     | "At every visit to the study physician, the following assessments were performed: fasting blood sample, systolic and diastolic blood pressure (SBP and DBP) according to recommended standards [18], waist circumference at a level midway between the lowest rib and the iliac crest to the nearest cm, height without shoes to the nearest cm (only first visit) and weight in indoor clothes to the nearest 100 g. Blood pressures were measured by an Omron M41 and weight with a Seca 771." | Control IG: 89/104 at follow up<br>Intervention IIG 93/109                                                                                                                                                                                                                                                                                                |            |
| <b>152</b> | <b>Nordby 2012</b>                                                                                                                                                                                                  | LOW                                                                         | LOW                                                                                                                                                                                                                                                                                                                                                                                                                                                                                              | UNCLEAR                                                                                                                                                                                                                                                                                                                                                   | HIGH       |
|            | Assessment justification:<br>"The randomization was performed over the three 6-mo blocks, using a manual lottery in which participants drew their own lot."                                                         | "Sixty participants were randomized, each participant drawing his own lot." | "Before, during, and after the intervention, participants underwent a panel of tests."                                                                                                                                                                                                                                                                                                                                                                                                           | Dropout rates for each group post intervention were >20% for all groups. "Of the 36 participants who completed T, D or T-iD, 28 participated in follow-up visits: 9 participants in T (6 months: n = 7; 12 months: n = 8), 10 participants in D and 9 participants in T-iD)." Only 41% of participants in group T participated at the 6-month time point. |            |
| <b>153</b> | <b>Nurkkala 2015</b>                                                                                                                                                                                                | UNCLEAR                                                                     | UNCLEAR                                                                                                                                                                                                                                                                                                                                                                                                                                                                                          | LOW                                                                                                                                                                                                                                                                                                                                                       | LOW        |
|            | Assessment justification:<br>NS                                                                                                                                                                                     | NS                                                                          | "All measurements were performed at baseline and at 9, 24 and 36 months. Body weight was measured to the nearest 0.1 kg using a calibrated scale (SOEHNLE S20, Soehnle waagen, Germany)."                                                                                                                                                                                                                                                                                                        | "Fifty-nine participants (66%) in the intervention group and seventeen participants (57%) in the control group completed the study."                                                                                                                                                                                                                      |            |
| <b>154</b> | <b>Oldroyd 2006</b>                                                                                                                                                                                                 | LOW                                                                         | UNCLEAR                                                                                                                                                                                                                                                                                                                                                                                                                                                                                          | LOW                                                                                                                                                                                                                                                                                                                                                       | LOW        |

| Study ID   |                           | Random sequence generation<br>(Selection bias)                                                                                                                            | Allocation concealment<br>(Selection bias)                                     | Blinding of outcome<br>assessment<br>(Detection bias)                                                                                                                                   | Incomplete outcome data<br>(Attrition bias)                                                                                                                                                                                                                       | Other bias                                                                                                                                                                                                                                                                                                                                                                                                                                                                                                                                                                                                                                        |
|------------|---------------------------|---------------------------------------------------------------------------------------------------------------------------------------------------------------------------|--------------------------------------------------------------------------------|-----------------------------------------------------------------------------------------------------------------------------------------------------------------------------------------|-------------------------------------------------------------------------------------------------------------------------------------------------------------------------------------------------------------------------------------------------------------------|---------------------------------------------------------------------------------------------------------------------------------------------------------------------------------------------------------------------------------------------------------------------------------------------------------------------------------------------------------------------------------------------------------------------------------------------------------------------------------------------------------------------------------------------------------------------------------------------------------------------------------------------------|
|            | Assessment justification: | Eligible participants who agreed to take part were randomly allocated using a random number table to the intervention or control group at the first baseline appointment. | "Researchers performing the randomisation were blind to the group allocation." | Weight was measured to the nearest 0.1 kg with the participants lightly clothed on SECA scales (Alpha Model 770 digital, SECA Limited, Birmingham, UK)                                  | 6-month follow-up: Control: 32/39 * 100 = 82%;<br>Intervention: 37/39*100 = 94.9%<br><br>12-month follow-up: Control: 30/39 * 100 = 77%;<br>Intervention: 32/39*100 = 82%<br><br>24-month follow-up: Control: 24/39 * 100 = 62%;<br>Intervention: 30/39*100 = 77% |                                                                                                                                                                                                                                                                                                                                                                                                                                                                                                                                                                                                                                                   |
| <b>155</b> | <b>Pan 1997</b>           | UNCLEAR                                                                                                                                                                   | UNCLEAR                                                                        | LOW                                                                                                                                                                                     | UNCLEAR                                                                                                                                                                                                                                                           | HIGH                                                                                                                                                                                                                                                                                                                                                                                                                                                                                                                                                                                                                                              |
|            | Assessment justification: | NS                                                                                                                                                                        | NS                                                                             | "Briefly, blood pressure, height, and weight were measured in light clothing without shoes following methods used in the WHO multinational study of vascular disease in diabetes (17)." | NS                                                                                                                                                                                                                                                                | "The original 6-year study randomised to 4 groups (1. control, 2. diet, 3. exercise 4. diet and exercise). However, for the 20-, 23- and 30 year follow-ups, the authors combined the intervention groups and only reported data for the 'control' versus 'intervention' arms. Authors state that the reason for this was that: "As diabetes incidence did not differ significantly among the three intervention groups during the active intervention period and because of limited power to detect differences, the intervention groups were combined and comparisons were made between the combined intervention group and the control group." |
| <b>156</b> | <b>Parikh 2010</b>        | UNCLEAR                                                                                                                                                                   | UNCLEAR                                                                        | LOW                                                                                                                                                                                     | LOW                                                                                                                                                                                                                                                               |                                                                                                                                                                                                                                                                                                                                                                                                                                                                                                                                                                                                                                                   |

| Study ID   |                           | Random sequence generation<br>(Selection bias)                                                                                                                                       | Allocation concealment<br>(Selection bias) | Blinding of outcome<br>assessment<br>(Detection bias)                              | Incomplete outcome data<br>(Attrition bias)                                                                                                                                                                                                                                                                                                                                     | Other bias |
|------------|---------------------------|--------------------------------------------------------------------------------------------------------------------------------------------------------------------------------------|--------------------------------------------|------------------------------------------------------------------------------------|---------------------------------------------------------------------------------------------------------------------------------------------------------------------------------------------------------------------------------------------------------------------------------------------------------------------------------------------------------------------------------|------------|
|            | Assessment justification: | "Participants were randomized to intervention or delayed intervention (in 1 year) by blocked randomization (block size=4) by recruitment site."<br><br>No further information given. | NS                                         | Weight measured objectively.                                                       | "The study had some attrition: 83 participants returned at 3 months, 79 at 6 months, and 72 at 12 months (37 control, 35 intervention). Four participants became ineligible because of pregnancy. The 23 participants lost to follow-up at 12 months did not differ from those who returned for the final check-up in age, gender, weight, BMI, or family history of diabetes." |            |
| <b>157</b> | <b>Patel 2016</b>         | UNCLEAR                                                                                                                                                                              | UNCLEAR                                    | LOW                                                                                | LOW                                                                                                                                                                                                                                                                                                                                                                             |            |
|            | Assessment justification: | "We stratified the randomization, so that people with a BMI of 30–40 were randomly assigned separately from those with a BMI of greater than 40."                                    | NS                                         | "All participants received \$25 for enrolling, \$25 for the six-month weigh-in..." | Control: 100%; Standard: 96.1%; Immediate: 96%; Daily lottery: 100% analysed.                                                                                                                                                                                                                                                                                                   |            |
| <b>158</b> | <b>Pavlou 1989a</b>       | UNCLEAR                                                                                                                                                                              | UNCLEAR                                    | UNCLEAR                                                                            | LOW                                                                                                                                                                                                                                                                                                                                                                             |            |
|            | Assessment justification: | NS                                                                                                                                                                                   | NS                                         | NS                                                                                 | Less than 25% of attrition at 36-month follow-up.                                                                                                                                                                                                                                                                                                                               |            |
| <b>159</b> | <b>Pavlou 1989b</b>       | UNCLEAR                                                                                                                                                                              | UNCLEAR                                    | UNCLEAR                                                                            | LOW                                                                                                                                                                                                                                                                                                                                                                             |            |
|            | Assessment justification: | NS                                                                                                                                                                                   | NS                                         | NS                                                                                 | Most subjects (103) of the main study reported to the clinic for follow-ups and the information on the remaining 7 subjects was obtained by a telephone interview.<br><br>110/160 participants completed the study                                                                                                                                                              |            |
| <b>160</b> | <b>Pearce 1981</b>        | UNCLEAR                                                                                                                                                                              | UNCLEAR                                    | LOW                                                                                | LOW                                                                                                                                                                                                                                                                                                                                                                             |            |

| Study ID   |                           | Random sequence generation<br>(Selection bias)                                                                                                                                                                                                                  | Allocation concealment<br>(Selection bias)             | Blinding of outcome<br>assessment<br>(Detection bias)                                                                                                                                                                                                                                                                                                     | Incomplete outcome data<br>(Attrition bias)                                                                                                                                                                                                                                                                                                                                   | Other bias                                                                                                                                                                                                                                                                                                                                                                                        |
|------------|---------------------------|-----------------------------------------------------------------------------------------------------------------------------------------------------------------------------------------------------------------------------------------------------------------|--------------------------------------------------------|-----------------------------------------------------------------------------------------------------------------------------------------------------------------------------------------------------------------------------------------------------------------------------------------------------------------------------------------------------------|-------------------------------------------------------------------------------------------------------------------------------------------------------------------------------------------------------------------------------------------------------------------------------------------------------------------------------------------------------------------------------|---------------------------------------------------------------------------------------------------------------------------------------------------------------------------------------------------------------------------------------------------------------------------------------------------------------------------------------------------------------------------------------------------|
|            | Assessment justification: | "Subjects were randomly assigned from stratified blocks of percentage overweight to one of five treatment conditions..."                                                                                                                                        | NS                                                     | "There was no contact between the therapist and subjects during the follow-up phase except during the 3-, 6-, and 12-month weigh-ins."                                                                                                                                                                                                                    | Of the original 68 subjects, all had met the attendance requirements at posttreatment, which represented a 0% attrition rate. By the 12-month follow-up, 6 subjects had been lost, which represented an 8.82% attrition rate.<br>Wives alone: Posttreatment N = 13; 3, 6, 12 months: N = 12;<br>Alternative treatment group: Post-treatment: N = 14; 3, 6, 12 months: N = 12. |                                                                                                                                                                                                                                                                                                                                                                                                   |
| <b>161</b> | <b>Pedersen 2013</b>      | LOW                                                                                                                                                                                                                                                             | UNCLEAR                                                | LOW                                                                                                                                                                                                                                                                                                                                                       | LOW                                                                                                                                                                                                                                                                                                                                                                           | UNCLEAR                                                                                                                                                                                                                                                                                                                                                                                           |
|            | Assessment justification: | "Randomization was stratified according to BMI ( $\leq 32.5$ ; $> 32.5$ ). A third party unrelated to the study performed en bloc randomization with bloc size 2, 4 and 6 using Stata 11.1 software (StataCorp, 4905 Lakeway Drive, College Station, TX, USA)." | NS                                                     | "All participants are examined at baseline, after 12 weeks and after a year. Most examinations were performed at University Hospital of Bispebjerg, Department of Cardiology, except the MRI that was performed at University Hospital of Herlev and PET that was performed at Rigshospitalet." This included body composition assessed by anthropometry. | Dropout rate at 12-weeks follow-up:<br>AIT: $31/35 \times 100 = 88.6\%$ ;<br>LED: $34/35 \times 100 = 97.1\%$<br><br>Drop out rate at 1-year follow-up:<br>AIT: $26/35 \times 100 = 74.3\%$ ;<br>LED: $29/35 \times 100 = 82.9\%$                                                                                                                                             | "Drop-out rates (26% and 17% in the AIT and LED+AIT group, respectively) imply that intensive lifestyle changes require physical and mental strength and support from relatives and employers especially when considering long-term interventions."<br>"However, drop-out rates introduce a risk of bias due to small sample size and challenges related to generalisability as discussed above." |
| <b>162</b> | <b>Pekkarinen 2015</b>    | LOW                                                                                                                                                                                                                                                             | LOW                                                    | LOW                                                                                                                                                                                                                                                                                                                                                       | LOW                                                                                                                                                                                                                                                                                                                                                                           |                                                                                                                                                                                                                                                                                                                                                                                                   |
|            | Assessment justification: | "A physician who had no contact with the patients carried out randomization using a computer-generated table of random numbers with block size of four and allocated participants."                                                                             | Refer to 'Random sequence generation (selection bias)' | "Weight was measured using a study purchased digital scale with an accuracy of 0.1 kg (Soehnle model 7307, Soehnle-Waagen GmbH & Co, Murrhardt, Germany) with light clothing and no shoes at                                                                                                                                                              | No maintenance group 69/100 at 17-weeks; 89/100 at 69-weeks; 75/100 at 121-weeks.<br><br>Maintenance group: 79/101 at 17-weeks; 68/101 at 12mths;                                                                                                                                                                                                                             |                                                                                                                                                                                                                                                                                                                                                                                                   |



| Study ID   | Random sequence generation<br>(Selection bias) | Allocation concealment<br>(Selection bias)                                                                                                                                                                                                                                                                                                                                 | Blinding of outcome<br>assessment<br>(Detection bias) | Incomplete outcome data<br>(Attrition bias)                                                                                                   | Other bias                                                                                                                                                                                                                                                                                                                                                                                                                                                                                                                                                              |
|------------|------------------------------------------------|----------------------------------------------------------------------------------------------------------------------------------------------------------------------------------------------------------------------------------------------------------------------------------------------------------------------------------------------------------------------------|-------------------------------------------------------|-----------------------------------------------------------------------------------------------------------------------------------------------|-------------------------------------------------------------------------------------------------------------------------------------------------------------------------------------------------------------------------------------------------------------------------------------------------------------------------------------------------------------------------------------------------------------------------------------------------------------------------------------------------------------------------------------------------------------------------|
|            |                                                |                                                                                                                                                                                                                                                                                                                                                                            | baseline, at each session and at weeks 69 and 121."   | 75/ 101 at 69-weeks; 68/101 at 121-weeks.                                                                                                     |                                                                                                                                                                                                                                                                                                                                                                                                                                                                                                                                                                         |
| <b>163</b> | <b>Perri 1984</b>                              | UNCLEAR                                                                                                                                                                                                                                                                                                                                                                    | UNCLEAR                                               | LOW                                                                                                                                           | LOW                                                                                                                                                                                                                                                                                                                                                                                                                                                                                                                                                                     |
|            | Assessment justification:                      | Subjects were assigned randomly from stratified blocks of percentage overweight to one of six experimental conditions in a 3 X 2 factorial design.                                                                                                                                                                                                                         | NS                                                    | Non-behaviour therapy - 'participants were weighed in front of their group'; Behaviour therapy - 'therapists weighed participants in private' | 28/129 dropped out, attrition rate 22%                                                                                                                                                                                                                                                                                                                                                                                                                                                                                                                                  |
| <b>164</b> | <b>Perri 1986</b>                              | UNCLEAR                                                                                                                                                                                                                                                                                                                                                                    | UNCLEAR                                               | LOW                                                                                                                                           | UNCLEAR                                                                                                                                                                                                                                                                                                                                                                                                                                                                                                                                                                 |
|            | Assessment justification:                      | "Subjects were assigned from blocks stratified by percentage over ideal weight to one of four experimental conditions in a 2 × 2 factorial design. Two treatment conditions (behavior therapy or behavior therapy plus aerobic exercise) were crossed with two posttreatment conditions (no posttreatment contact or a multicomponent posttreatment maintenance program)." |                                                       | "Changes in weight were assessed at posttreatment and at 3-, 6-, 12-, and 18-month follow-up sessions."                                       | "Of the 90 subjects who began the program, 18 dropped out during the initial treatment phase, representing an attrition rate of 20%. Rates of attrition did not differ significantly among groups, and subjects who dropped out did not differ significantly from subjects who completed the program in either initial body weight or percentage overweight. During the follow-up phase of the study, 4 subjects elected not to participate in the maintenance program and 1 person was hospitalized (for a problem unrelated to obesity) and withdrew from the study." |
| <b>165</b> | <b>Perri 1987</b>                              | UNCLEAR                                                                                                                                                                                                                                                                                                                                                                    | UNCLEAR                                               | LOW                                                                                                                                           | LOW                                                                                                                                                                                                                                                                                                                                                                                                                                                                                                                                                                     |

| Study ID   |                           | Random sequence generation<br>(Selection bias)                                                  | Allocation concealment<br>(Selection bias) | Blinding of outcome<br>assessment<br>(Detection bias)                                                                                                                               | Incomplete outcome data<br>(Attrition bias)                                                                                                                                                                                                                                                                                                                                                                                                                                                                                        | Other bias |
|------------|---------------------------|-------------------------------------------------------------------------------------------------|--------------------------------------------|-------------------------------------------------------------------------------------------------------------------------------------------------------------------------------------|------------------------------------------------------------------------------------------------------------------------------------------------------------------------------------------------------------------------------------------------------------------------------------------------------------------------------------------------------------------------------------------------------------------------------------------------------------------------------------------------------------------------------------|------------|
|            | Assessment justification: | " At pretreatment, clients were randomly assigned by sex to one of the following conditions..." | NS                                         | "The dependent measures included body weight, body-mass index (BMI), and percent overweight. Assessment occurred at pre- and posttreatment and at 7-month and 18-month follow-ups." | "Of the 109 clients who began the program, 24 dropped out during treatment, representing an initial attrition rate of 22%. Over the course of the 18-month follow-up period, an additional 10 clients withdrew from the program; thus, 75 of the 109 clients (69%) participated in treatment through the 18-month follow-up evaluation. Rates of attrition during the treatment and follow-up phases of the study were similar across conditions (ps > .20)."<br><br>Total attrition rate per group: B+P = 69%; B+T: 57.8%; B =73% |            |
| <b>166</b> | <b>Perri 1989</b>         | UNCLEAR                                                                                         | UNCLEAR                                    | UNCLEAR                                                                                                                                                                             | LOW                                                                                                                                                                                                                                                                                                                                                                                                                                                                                                                                |            |
|            | Assessment justification: | NS                                                                                              | NS                                         | NS                                                                                                                                                                                  | Less than 50% attrition at 72-week follow-up.                                                                                                                                                                                                                                                                                                                                                                                                                                                                                      |            |
| <b>167</b> | <b>Perri 1997</b>         | UNCLEAR                                                                                         | UNCLEAR                                    | LOW                                                                                                                                                                                 | LOW                                                                                                                                                                                                                                                                                                                                                                                                                                                                                                                                |            |
|            | Assessment justification: | NS                                                                                              | NS                                         | "Weight was measured on a balance beam scale at each weight loss program session, with the participant in indoor clothing without shoes."                                           | "Forty of the 49 (81.6%) participants completed the 12-month treatment program. One participant in the home-based program became pregnant during Month 2, and her data were excluded from all analyses. There were 7 dropouts in the group-based exercise condition and 1 dropout in the home-based exercise condition"                                                                                                                                                                                                            |            |

| Study ID   |                           | Random sequence generation<br>(Selection bias)                                                                                                                            | Allocation concealment<br>(Selection bias) | Blinding of outcome<br>assessment<br>(Detection bias)                                                           | Incomplete outcome data<br>(Attrition bias)                                                                                                                                                                                                                                                                                                                                                                                                      | Other bias |
|------------|---------------------------|---------------------------------------------------------------------------------------------------------------------------------------------------------------------------|--------------------------------------------|-----------------------------------------------------------------------------------------------------------------|--------------------------------------------------------------------------------------------------------------------------------------------------------------------------------------------------------------------------------------------------------------------------------------------------------------------------------------------------------------------------------------------------------------------------------------------------|------------|
| <b>168</b> | <b>Perri 2001</b>         | UNCLEAR                                                                                                                                                                   | UNCLEAR                                    | UNCLEAR                                                                                                         | UNCLEAR                                                                                                                                                                                                                                                                                                                                                                                                                                          |            |
|            | Assessment justification: | The authors only mention that participants were assigned randomly to one of three conditions, however no information regarding the methods of randomization are provided. | NS                                         | "The primary outcome measure was change in body weight assessed over the course of 17 months."                  | Total number of participants at baseline: 103; 88 completed the 5-month program, yielding an initial treatment completion rate of 85%. At the conclusion of initial treatment, the small number of male participants was unevenly distributed across conditions, and the data from these participants (n = 8) were excluded from further analysis. Thus, the study sample consisted of 80 women. 17 Month follow-up: BT = 15; RPT = 20; PST = 23 |            |
| <b>169</b> | <b>Perri 2014</b>         | UNCLEAR                                                                                                                                                                   | UNCLEAR                                    | LOW                                                                                                             | LOW                                                                                                                                                                                                                                                                                                                                                                                                                                              |            |
|            | Assessment justification: | NS                                                                                                                                                                        | NS                                         | Weight was measured with a digital scale (Tanita Model BWB-800S, Arlington Heights, IL) at Months 0, 6, and 24. | Control:<br>162/169 at 6mths; 142/169 at 24mths.<br><br>Low dose:<br>138/148 at 6mths; 112/148 at 24mths.<br><br>Moderate dose: 129/134 at 6mths; 112/134 at 24mths.<br><br>High dose:<br>155/161 at 6mths; 126/161 at 24mths.                                                                                                                                                                                                                   |            |
| <b>170</b> | <b>Pettman 2009</b>       | LOW                                                                                                                                                                       | LOW                                        | LOW                                                                                                             | LOW                                                                                                                                                                                                                                                                                                                                                                                                                                              |            |

| Study ID   |                           | Random sequence generation<br>(Selection bias)                                                                                                                                                                                                                                                                                                                                                                                                                                                                                                                                                                   | Allocation concealment<br>(Selection bias)                                                                                                                                                | Blinding of outcome<br>assessment<br>(Detection bias)                                                                                                                                                                                                                                                                                                                                                                                                                                                                                                                                                                              | Incomplete outcome data<br>(Attrition bias)                                                                                                                                                                                                                                                                | Other bias |
|------------|---------------------------|------------------------------------------------------------------------------------------------------------------------------------------------------------------------------------------------------------------------------------------------------------------------------------------------------------------------------------------------------------------------------------------------------------------------------------------------------------------------------------------------------------------------------------------------------------------------------------------------------------------|-------------------------------------------------------------------------------------------------------------------------------------------------------------------------------------------|------------------------------------------------------------------------------------------------------------------------------------------------------------------------------------------------------------------------------------------------------------------------------------------------------------------------------------------------------------------------------------------------------------------------------------------------------------------------------------------------------------------------------------------------------------------------------------------------------------------------------------|------------------------------------------------------------------------------------------------------------------------------------------------------------------------------------------------------------------------------------------------------------------------------------------------------------|------------|
|            | Assessment justification: | "Using a random number generator (MS Excel), participant data were then distributed into three groups of approximately equal numbers. Unidentifiable individuals were block-matched to achieve an even gender balance and distribution of MetS risk factors over the 3 groups by calculating means for waist, DBP and age together with counts of males and females for each group. The groups were checked for significant differences between variables using independent samples t-tests. The three groups were then randomly assigned to 'A', 'B' or 'C' corresponding to INT-A, INT-B or CON respectively." | "Study personnel generating the sequence were not aware of participant details, due to obscuring of identification numbers. Final group assignment was conducted by an impartial person." | "Body weight was measured to the nearest 0.1 kg (Tanita Ultimate scales™ Model 2000, Tanita Corporation, Tokyo, Japan), except for individuals weighing over 150 kg, who were weighed on a single set of electronic glass scales (Model 3200, Propert Pty Ltd, Castle Hill, NSW, Australia). The same set of scales was used at subsequent measurements for each participant."                                                                                                                                                                                                                                                     | Retention rate:<br>4-months:<br>Control: 86%;<br>INT-A: 98%;<br>INT-B: 92.6%<br><br>12-months:<br>Control: 36/43*100 83.7%;<br>INT-A: 44/48*100 = 91.6%;<br>INT-B: 35/49*100 = 92.6%                                                                                                                       |            |
| <b>171</b> | <b>Poelman 2015</b>       | LOW                                                                                                                                                                                                                                                                                                                                                                                                                                                                                                                                                                                                              | UNCLEAR                                                                                                                                                                                   | HIGH                                                                                                                                                                                                                                                                                                                                                                                                                                                                                                                                                                                                                               | LOW                                                                                                                                                                                                                                                                                                        |            |
|            | Assessment justification: | "Randomization lists were generated with standard statistical computer software (IBM SPSS Statistics 20.0). Based on the randomization list, the researcher (M.P.P) allocated subjects to one of the groups."                                                                                                                                                                                                                                                                                                                                                                                                    | "Due to the nature of the intervention, it was not possible to blind participants to their allocated condition."                                                                          | At baseline (T0), weight was measured using two different scales: a professional one (the Marsden MPMS-250 digital scale, Oxfordshire, UK) and the participant's scale, in light clothes and with shoes removed. Measurements were highly correlated (regression coefficient= 0.99; intercept=-0.10), indicating that both scales yield largely similar results. At T2, the weight was also objectively measured using the professional scale, during a home visit from the researchers. At T1 and T3, participants were asked again to weigh themselves.<br><br>T0 = Baseline<br>T1 = 3-months<br>T2 = 6-months<br>T3 = 12-months | Less than 50% at 12-month follow-up.<br>Control 73.4% Intervention 64% at 12-month follow-up<br><br>At 3-months:<br>usual care: 111/139;<br>intervention: 85/138<br><br>At 6-months:<br>usual care: 118/139;<br>intervention: 105/138<br><br>At 12-months:<br>usual care: 102/139;<br>intervention: 89/138 |            |

| Study ID   | Random sequence generation<br>(Selection bias) | Allocation concealment<br>(Selection bias)                                                                                                                                             | Blinding of outcome<br>assessment<br>(Detection bias)                                                       | Incomplete outcome data<br>(Attrition bias)                                                                                                                                                                                                | Other bias                                                                                                                                                                                                                                                                                                                                                                                                                                       |
|------------|------------------------------------------------|----------------------------------------------------------------------------------------------------------------------------------------------------------------------------------------|-------------------------------------------------------------------------------------------------------------|--------------------------------------------------------------------------------------------------------------------------------------------------------------------------------------------------------------------------------------------|--------------------------------------------------------------------------------------------------------------------------------------------------------------------------------------------------------------------------------------------------------------------------------------------------------------------------------------------------------------------------------------------------------------------------------------------------|
|            |                                                |                                                                                                                                                                                        | T1 (3-months) time point was intervention end and participants self-weighed.                                |                                                                                                                                                                                                                                            |                                                                                                                                                                                                                                                                                                                                                                                                                                                  |
| <b>172</b> | <b>Promrat 2010</b>                            | LOW                                                                                                                                                                                    | LOW                                                                                                         | LOW                                                                                                                                                                                                                                        |                                                                                                                                                                                                                                                                                                                                                                                                                                                  |
|            | Assessment justification:                      | "Randomization was performed using a random number generator developed by the project statistician, with a target enrollment of 30 participants."                                      | "The randomization process was conducted by a project staff who was blinded to the randomization sequence." | "Data collection was obtained by trained staff who were not aware of the group assignment or sequence of measurement."                                                                                                                     | "Thirty participants (97%) completed the study. One participant (3%) in the lifestyle intervention group withdrew from the study after 3 months. All other participants adhered to the study protocol follow-up schedule."                                                                                                                                                                                                                       |
| <b>173</b> | <b>Provencher 2009</b>                         | UNCLEAR                                                                                                                                                                                | UNCLEAR                                                                                                     | LOW                                                                                                                                                                                                                                        | LOW                                                                                                                                                                                                                                                                                                                                                                                                                                              |
|            | Assessment justification:                      | "Randomization was performed within each phase, and women were then assigned to one of the 3 treatment conditions: HAES group (N = 48), SS group (N = 48), or control group (N = 48)." | NS                                                                                                          | "Height was measured to the nearest millimeter with a stadiometer, and body weight was measured to the nearest 0.1 kg on a calibrated balance. Participants were asked to dress lightly and to remove their shoes for these measurements." | Baseline (T=0):<br>Control: 46/48*100 = 95.8%;<br>SS Group: 46/48*100 = 95.8%;<br>HAES: 100%<br><br>4-months (T=4): Control:<br>38/48*100 = 79.2%;<br>SS Group: 39/48*100 = 81.3%;<br>HAES: 44/48*100 =91.7%<br><br>10-months (T=10): Control:<br>34/48*100 = 70.8%;<br>SS Group: 38/48*100 = 79.2%;<br>HAES: 45/48*100 =93.8%<br><br>16-months (T=16): Control:<br>32/48*100 = 66.7%;<br>SS Group: 33/48*100 = 78.8%;<br>HAES: 41/48*100 =85.4% |
| <b>174</b> | <b>Ptomey 2018</b>                             | LOW                                                                                                                                                                                    | LOW                                                                                                         | LOW                                                                                                                                                                                                                                        | LOW                                                                                                                                                                                                                                                                                                                                                                                                                                              |

| Study ID   |                           | Random sequence generation<br>(Selection bias)                                                                                                                                                                                                                                                                                                                                                                                                                                   | Allocation concealment<br>(Selection bias)                                                                             | Blinding of outcome<br>assessment<br>(Detection bias)                                                                                                                                                                                                                                                                                                                            | Incomplete outcome data<br>(Attrition bias)                                                                                | Other bias |
|------------|---------------------------|----------------------------------------------------------------------------------------------------------------------------------------------------------------------------------------------------------------------------------------------------------------------------------------------------------------------------------------------------------------------------------------------------------------------------------------------------------------------------------|------------------------------------------------------------------------------------------------------------------------|----------------------------------------------------------------------------------------------------------------------------------------------------------------------------------------------------------------------------------------------------------------------------------------------------------------------------------------------------------------------------------|----------------------------------------------------------------------------------------------------------------------------|------------|
|            | Assessment justification: | “Following receipt of written physician clearance, participants were computer randomized, stratified by the number of adults with intellectual and developmental disabilities in a residence (alone, 1–2, or 3–5), with equal allocation to the eSLD and CD groups. Multiple adults in a single residence volunteering to participate were assigned to the same intervention group. There were 24 residences with two participants and nine residences with three participants.” | “Allocation was concealed in envelopes, which were delivered to the study coordinator as participants were recruited.” | Weight measured objectively.                                                                                                                                                                                                                                                                                                                                                     | CD: 57/72 at 6mths; 47/72 at 18mths<br><br>eSLD: 67/77 at 6mths; 54/77 at 18mths<br>(1 withdrew before starting (78-1=77)) |            |
| <b>175</b> | <b>Ramirez 2001</b>       | UNCLEAR                                                                                                                                                                                                                                                                                                                                                                                                                                                                          | UNCLEAR                                                                                                                | UNCLEAR                                                                                                                                                                                                                                                                                                                                                                          | LOW                                                                                                                        |            |
|            | Assessment justification: | NS                                                                                                                                                                                                                                                                                                                                                                                                                                                                               | NS                                                                                                                     | A digital scale was used. "At 12m FU, there were several participants who were unavailable for weighing in the research center. In those instances, self-reported weight was taken and corrected by taking the average discrepancy between observed and self-reported weights on the three prior weightings" (unclear how many participants this applies to and which study arm) | Attrition was less than 50% for both groups at 12-month follow-up.                                                         |            |
| <b>176</b> | <b>Rejeski 2011</b>       | LOW                                                                                                                                                                                                                                                                                                                                                                                                                                                                              | UNCLEAR                                                                                                                | LOW                                                                                                                                                                                                                                                                                                                                                                              | LOW                                                                                                                        |            |
|            | Assessment justification: | “Each participant was randomized to treatment using a permuted block randomization scheme with stratification by wave within each county in an effort to minimize confounding between treatment and location.”                                                                                                                                                                                                                                                                   | NS                                                                                                                     | Weight measured objectively.                                                                                                                                                                                                                                                                                                                                                     | Less than 50% attrition at 18-month follow-up.                                                                             |            |
| <b>177</b> | <b>Ridgeway 1999</b>      | UNCLEAR                                                                                                                                                                                                                                                                                                                                                                                                                                                                          | UNCLEAR                                                                                                                | LOW                                                                                                                                                                                                                                                                                                                                                                              | LOW                                                                                                                        |            |
|            | Assessment justification: | NS                                                                                                                                                                                                                                                                                                                                                                                                                                                                               | NS                                                                                                                     | "The patients were weighed..."                                                                                                                                                                                                                                                                                                                                                   | CG: 20/28 = 71%; IG: 18/28 = 64%                                                                                           |            |
| <b>178</b> | <b>Rock 2015</b>          | LOW                                                                                                                                                                                                                                                                                                                                                                                                                                                                              | LOW                                                                                                                    | LOW                                                                                                                                                                                                                                                                                                                                                                              | LOW                                                                                                                        |            |

| Study ID   |                           | Random sequence generation<br>(Selection bias)                                                                                                                                                                                                                             | Allocation concealment<br>(Selection bias)                      | Blinding of outcome<br>assessment<br>(Detection bias)                                                                                                                                                           | Incomplete outcome data<br>(Attrition bias)                                                                                                                                                                                                                                                                                                                                                                                                                                                                                                   | Other bias |
|------------|---------------------------|----------------------------------------------------------------------------------------------------------------------------------------------------------------------------------------------------------------------------------------------------------------------------|-----------------------------------------------------------------|-----------------------------------------------------------------------------------------------------------------------------------------------------------------------------------------------------------------|-----------------------------------------------------------------------------------------------------------------------------------------------------------------------------------------------------------------------------------------------------------------------------------------------------------------------------------------------------------------------------------------------------------------------------------------------------------------------------------------------------------------------------------------------|------------|
|            | Assessment justification: | "Random assignment was performed by a centralized computer process, assigning participants in a 1:1 ratio to either the intervention arm or the less intensive intervention control arm, stratified by age (or 55 years), stage (I v others [II and III]), and study site. | "Randomization was performed by a centralized computer process" | Weight was measured at baseline and at 6-, 12-, 18- and 24-month follow-up visits, using a calibrated scale.                                                                                                    | "Weight was not available for 44 intervention group and 61 control group participants at 24 months"                                                                                                                                                                                                                                                                                                                                                                                                                                           |            |
| <b>179</b> | <b>Rolls 2005</b>         | UNCLEAR                                                                                                                                                                                                                                                                    | UNCLEAR                                                         | LOW                                                                                                                                                                                                             | LOW                                                                                                                                                                                                                                                                                                                                                                                                                                                                                                                                           |            |
|            | Assessment justification: | "...a stratified randomization scheme was used to balance the distribution of subject sex and age across the groups."                                                                                                                                                      | NS                                                              | "Body weight was measured at each counseling session, with the subject wearing light clothing without shoes, using a scale that was regularly calibrated."                                                      | Less than 50% attrition at 12-month follow-up.                                                                                                                                                                                                                                                                                                                                                                                                                                                                                                |            |
| <b>180</b> | <b>Rolls 2017</b>         | LOW                                                                                                                                                                                                                                                                        | UNCLEAR                                                         | LOW                                                                                                                                                                                                             | LOW                                                                                                                                                                                                                                                                                                                                                                                                                                                                                                                                           |            |
|            | Assessment justification: | "Participants were stratified by body mass index and age, and randomly assigned to one of three groups, using blocks of six sequences from a random number generator."                                                                                                     | NS                                                              | "Subjects were weighed to the nearest 0.1 kg while wearing a lightweight outfit kept for them at the center. Height was measured with a stadiometer; waist circumference was measured at the right iliac crest. | 3-month:<br>total sample follow-up: 170/186* = 91.4%; Standard advice group: 59/62*100 = 95%; Portion selection: 58/62*100 = 93.5%; Pre-portioned foods: 59/62*100 = 95%<br><br>6-month:<br>total sample follow-up: 149/186* = 80.1%; Standard advice group: 52/62*100 = 83.9%; Portion selection: 51/62*100 = 82.3%; Pre-portioned foods: 53/62*100 = 85.5%<br><br>12-month:<br>total sample follow-up: 136/186* = 73%; Standard advice group: 49/62*100 = 79%; Portion selection: 51/62*100 = 82.3%; Pre-portioned foods: 51/62*100 = 82.3% |            |
| <b>181</b> | <b>Rosas 2015</b>         | LOW                                                                                                                                                                                                                                                                        | UNCLEAR                                                         | LOW                                                                                                                                                                                                             | LOW                                                                                                                                                                                                                                                                                                                                                                                                                                                                                                                                           |            |

| Study ID   |                           | Random sequence generation<br>(Selection bias)                                                                                                                                                                                                                                                                                                                        | Allocation concealment<br>(Selection bias)     | Blinding of outcome<br>assessment<br>(Detection bias)                                                                                                                                                                                                                                                                              | Incomplete outcome data<br>(Attrition bias)                                                                                                                                                                                                                                                                                                                                                                                                                                                                                                    | Other bias                                                                                                   |
|------------|---------------------------|-----------------------------------------------------------------------------------------------------------------------------------------------------------------------------------------------------------------------------------------------------------------------------------------------------------------------------------------------------------------------|------------------------------------------------|------------------------------------------------------------------------------------------------------------------------------------------------------------------------------------------------------------------------------------------------------------------------------------------------------------------------------------|------------------------------------------------------------------------------------------------------------------------------------------------------------------------------------------------------------------------------------------------------------------------------------------------------------------------------------------------------------------------------------------------------------------------------------------------------------------------------------------------------------------------------------------------|--------------------------------------------------------------------------------------------------------------|
|            | Assessment justification: | Participants are randomized to one of three arms according to the ratio 1 UC: 2 CM: 2 CM+CHW. After all baseline data were collected, a blinded data analyst/biostatistician confirmed study data completion and randomizes the participant to one of the three arms in permuted blocks stratified by sex, BMI (30-34.9, 35-39.9, or $\pm 40$ ), and diabetes status. | The data analyst/ biostatistician was blinded. | Data collection staff were blinded to treatment assignment.<br><br>Weight was measured at each assessment visit in duplicate using a Detecto scale, whereas height was measured in duplicate using a wall-mounted stadiometer at baseline only. Participants' anthropometric measures were assessed without their shoes and coats. | As in other lifestyle intervention trials, all participants did not attend all planned intervention activities (one-on-one case management, groups sessions, and home visits). This limited our ability to test whether the planned intervention had the intended effect. Nevertheless, the percentage of participants attending each activity was within the expected range. Body weight was collected from 207 participants (100%) at baseline, followed by 190 (91.8%) at 6 months, 171 (82.6%) at 12 months, and 177 (85.5%) at 24 months. |                                                                                                              |
| <b>182</b> | <b>Ross 2012</b>          | LOW                                                                                                                                                                                                                                                                                                                                                                   | UNCLEAR                                        | LOW                                                                                                                                                                                                                                                                                                                                | LOW                                                                                                                                                                                                                                                                                                                                                                                                                                                                                                                                            |                                                                                                              |
|            | Assessment justification: | Eligible participants were randomized on the basis of a computer automated randomization sequence after the acquisition of primary outcome data. Randomization was stratified by sex, age, and WC measurement                                                                                                                                                         | NS                                             | Weight objectively measured.                                                                                                                                                                                                                                                                                                       | Of the 490 participants, 396 (80.8%) returned for follow-up testing at 24 months.                                                                                                                                                                                                                                                                                                                                                                                                                                                              |                                                                                                              |
| <b>183</b> | <b>Samaras 1997</b>       | UNCLEAR                                                                                                                                                                                                                                                                                                                                                               | UNCLEAR                                        | LOW                                                                                                                                                                                                                                                                                                                                | LOW                                                                                                                                                                                                                                                                                                                                                                                                                                                                                                                                            | UNCLEAR                                                                                                      |
|            | Assessment justification: | 'Subjects were randomised into two groups'<br><br>No further information given.                                                                                                                                                                                                                                                                                       | NS                                             | All anthropometric measures were performed by a trained investigator (AMM). Body height was measured to the nearest cm using a stadiometer with the subject barefoot; body weight to the nearest 0.1 kg in light street clothing. B                                                                                                | Control:<br>13/13 at 12-months<br>Intervention:<br>13/13 at 12-months<br><br>0% dropout by end of study                                                                                                                                                                                                                                                                                                                                                                                                                                        | After the 6-month programme, the exercise sessions remained available to subjects in the intervention group. |
| <b>184</b> | <b>Santanasto 2011</b>    | LOW                                                                                                                                                                                                                                                                                                                                                                   | UNCLEAR                                        | LOW                                                                                                                                                                                                                                                                                                                                | LOW                                                                                                                                                                                                                                                                                                                                                                                                                                                                                                                                            |                                                                                                              |
|            | Assessment justification: | "Randomization was done using a Microsoft Access-based random-number generating algorithm with stratification by age and sex to further ensure balance between groups (Microsoft Redmond, Washington)."                                                                                                                                                               | NS                                             | "At the baseline (BL) screening visit and followup visits, body height (cm) was measured using a wall-mounted stadiometer and body weight (kg)with a standard                                                                                                                                                                      | "All participants, with the exception of one in the PA+SA group, were followed up to their 6FU visits."<br>12 Month follow-up: PA +LW =                                                                                                                                                                                                                                                                                                                                                                                                        |                                                                                                              |



| Study ID   | Random sequence generation<br>(Selection bias) | Allocation concealment<br>(Selection bias)                                                                                                                                                                                                                                                                                                                                 | Blinding of outcome<br>assessment<br>(Detection bias)                                              | Incomplete outcome data<br>(Attrition bias)                                                                                                                                                                                                                    | Other bias                                                                                                                                                                                                                                                                                                           |
|------------|------------------------------------------------|----------------------------------------------------------------------------------------------------------------------------------------------------------------------------------------------------------------------------------------------------------------------------------------------------------------------------------------------------------------------------|----------------------------------------------------------------------------------------------------|----------------------------------------------------------------------------------------------------------------------------------------------------------------------------------------------------------------------------------------------------------------|----------------------------------------------------------------------------------------------------------------------------------------------------------------------------------------------------------------------------------------------------------------------------------------------------------------------|
|            |                                                |                                                                                                                                                                                                                                                                                                                                                                            | certified calibrated scale and were used to calculate BMI (weight (kg)/height (m <sup>2</sup> ))." | 18/21*100 = 85.7%; PA + SA = 93.3%                                                                                                                                                                                                                             |                                                                                                                                                                                                                                                                                                                      |
| <b>185</b> | <b>Sattin 2016</b>                             | UNCLEAR                                                                                                                                                                                                                                                                                                                                                                    | UNCLEAR                                                                                            | UNCLEAR                                                                                                                                                                                                                                                        | LOW                                                                                                                                                                                                                                                                                                                  |
|            | Assessment justification:                      | <p>“Churches were recruited as pairs in the study based on congregation size. These pairs were included in six cohorts with each cohort including either two or four churches. Each church pair was then randomized to the Fit Body and Soul (FBAS) behavioral lifestyle intervention or Health Education (HE) comparison group.”</p> <p>No further information given.</p> | Allocation concealment through pastor but no further detail given.                                 | NS                                                                                                                                                                                                                                                             | No attrition.                                                                                                                                                                                                                                                                                                        |
| <b>186</b> | <b>Schubel 2016</b>                            | LOW                                                                                                                                                                                                                                                                                                                                                                        | LOW                                                                                                | LOW                                                                                                                                                                                                                                                            | LOW                                                                                                                                                                                                                                                                                                                  |
|            | Assessment justification:                      | <p>"They sequentially enter the study and are randomly allocated to the three dietary programs (ICR, CCR, or HD) by RANDI2 [9], a web-based software using a block size of six. Randomization is stratified by age (&lt;50 years/ ≥ 50 years) and sex."</p>                                                                                                                | Refer to ‘Random sequence generation (selection bias)’.                                            | "All outcome assessments (see Table 2) are performed by trained study personnel following standard operating procedures."                                                                                                                                      | Overall, 144 participants (96.0%) completed the 12-wk intervention phase, 143 (95.3%) the 12-wk maintenance phase, and 136 (90.7%) the 26-wk follow-up phase (Figure 1). Across the entire study period of 50 wk there were 4 dropouts in the ICR (91.8%), 7 in the CCR (85.7%), and 2 (96.2%) in the Control group. |
| <b>187</b> | <b>Seligman 2011</b>                           | LOW                                                                                                                                                                                                                                                                                                                                                                        | LOW                                                                                                | LOW                                                                                                                                                                                                                                                            | LOW                                                                                                                                                                                                                                                                                                                  |
|            | Assessment justification:                      | <p>“Randomization was performed using a computer sequence with centrally concealed allocation.”</p>                                                                                                                                                                                                                                                                        | Refer to ‘Random sequence generation (selection bias)’.                                            | <p>“Body mass index was calculated as weight/height<sup>2</sup> (kilograms per square meter). Waist was measured between the last rib and the iliac crest. Body fat mass was assessed with bioelectrical impedance (Omron HBF 306 Bioimpedance Analyzer).”</p> | Less than 25% attrition at 12-months follow-up.                                                                                                                                                                                                                                                                      |
| <b>188</b> | <b>Shikany 2013</b>                            | LOW                                                                                                                                                                                                                                                                                                                                                                        | LOW                                                                                                | LOW                                                                                                                                                                                                                                                            | LOW                                                                                                                                                                                                                                                                                                                  |

| Study ID   |                           | Random sequence generation<br>(Selection bias)                                                                                                              | Allocation concealment<br>(Selection bias)                                                                                                                                                                                                                                                                                | Blinding of outcome<br>assessment<br>(Detection bias)                                                                                                                                                                                                                                                                                                                                                                                                                                     | Incomplete outcome data<br>(Attrition bias)                                                                                                                                                                                                                                                          | Other bias                                                                                                                                                                                                                                             |
|------------|---------------------------|-------------------------------------------------------------------------------------------------------------------------------------------------------------|---------------------------------------------------------------------------------------------------------------------------------------------------------------------------------------------------------------------------------------------------------------------------------------------------------------------------|-------------------------------------------------------------------------------------------------------------------------------------------------------------------------------------------------------------------------------------------------------------------------------------------------------------------------------------------------------------------------------------------------------------------------------------------------------------------------------------------|------------------------------------------------------------------------------------------------------------------------------------------------------------------------------------------------------------------------------------------------------------------------------------------------------|--------------------------------------------------------------------------------------------------------------------------------------------------------------------------------------------------------------------------------------------------------|
|            | Assessment justification: | "At the baseline visit, eligible participants were randomly assigned to the MD or FB group via a pseudorandom number generator with a 1:1 allocation ratio" | "The allocated group was indicated on cards contained in sequentially numbered, opaque, sealed envelopes prepared in the Department of Biostatistics, UAB School of Public Health. To randomize a participant, the study coordinator opened the next consecutively numbered envelope in the presence of the participant." | "...fasting serum glucose concentration was assessed; height, weight and blood pressure were measured; Body weight was assessed at baseline and at the 26- and 52-week clinic visits as outcome measures (and at the 8-, 16-, 32- and 40-week clinic visits as a check of participant progress), with participants in light clothing and no shoes using a Tanita model BC-418 digital scale/body composition analyzer (Tanita Corporation of America, Inc., Arlington Heights, IL, USA)." | 6-month retention rate:<br>FB: 49/60 = 81.6%;<br>MD: 56/60 = 93.3%<br><br>12-month retention rate:<br>FB: 56/60 = 93.3%;<br>MD: 57/60 = 95%<br><br>Food based: 45/60<br>Medifast: 50/60                                                                                                              |                                                                                                                                                                                                                                                        |
| <b>189</b> | <b>Sikand 1988</b>        | UNCLEAR                                                                                                                                                     | UNCLEAR                                                                                                                                                                                                                                                                                                                   | LOW                                                                                                                                                                                                                                                                                                                                                                                                                                                                                       | LOW                                                                                                                                                                                                                                                                                                  |                                                                                                                                                                                                                                                        |
|            |                           | NS                                                                                                                                                          | NS                                                                                                                                                                                                                                                                                                                        | "Subjects in both groups took body composition tests..."                                                                                                                                                                                                                                                                                                                                                                                                                                  | Follow-up at intervention end (4 months):<br>Non-exercisers: 66%;<br>Exercisers: 73%.<br>Non exercisers: 10/15;<br>Exercisers: 11/15. LOW<br><br>Follow-up rate at the first follow-up following intervention end (2 years):<br>Non exercisers: 8/15 (53%)<br>LOW;<br>Exercisers: 7/15 (46.7%) HIGH. |                                                                                                                                                                                                                                                        |
| <b>190</b> | <b>Silva 2010</b>         | LOW                                                                                                                                                         | UNCLEAR                                                                                                                                                                                                                                                                                                                   | LOW                                                                                                                                                                                                                                                                                                                                                                                                                                                                                       | LOW                                                                                                                                                                                                                                                                                                  | UNCLEAR                                                                                                                                                                                                                                                |
|            | Assessment justification: | "...using the random number generator function for Microsoft Excel 2007 for Windows."                                                                       | NS                                                                                                                                                                                                                                                                                                                        | "Assessments included lab-measured body weight and body composition (assessed at baseline, 4 and 12 months (end of the intervention program))..."<br>At 2 and 3 year follow-ups:<br>"Body weight was measured twice, using an electronic scale calibrated on site and accurate to                                                                                                                                                                                                         | Retention rates at each follow-up (not reported for 2-year follow-up):<br><br>12-months:<br>Comparison group: 80%;<br>Intervention group: 93%;                                                                                                                                                       | "A total of 258 women completed initial assessments and were randomized to intervention and comparison groups. Thirty-seven women were subsequently excluded from all analyses because they started taking medication (antidepressant, anxiolytic, and |

| Study ID   | Random sequence generation<br>(Selection bias) | Allocation concealment<br>(Selection bias)                                                                                                                            | Blinding of outcome<br>assessment<br>(Detection bias) | Incomplete outcome data<br>(Attrition bias)                                                                                                                                                                                                                         | Other bias                                                                                                                                                                                                                                                                                                                                                                                       |                                                                                                      |
|------------|------------------------------------------------|-----------------------------------------------------------------------------------------------------------------------------------------------------------------------|-------------------------------------------------------|---------------------------------------------------------------------------------------------------------------------------------------------------------------------------------------------------------------------------------------------------------------------|--------------------------------------------------------------------------------------------------------------------------------------------------------------------------------------------------------------------------------------------------------------------------------------------------------------------------------------------------------------------------------------------------|------------------------------------------------------------------------------------------------------|
|            |                                                |                                                                                                                                                                       | 0.1 kg (SECA, Hamburg, Germany)."                     | 3-year:<br>Comparison group: 80% ;<br>Intervention group: 79% *<br><br>*"For the 36-month analyses reported herein, 2 women without 36-month anthropometric data were excluded, leaving a final sample of 154 women."                                               | antiepileptic) susceptible to affect weight (n = 13) or because of serious chronic disease diagnosis or severe illness/injury (n = 4). Others were excluded because of pregnancy (n = 11) or because they entered menopause (n = 9). These 37 women were of similar age (P = 0.737) and BMI (P = 0.852) as the 221 participants who were considered as the valid initial sample for this study." |                                                                                                      |
| <b>191</b> | <b>Snel 2012</b>                               | UNCLEAR                                                                                                                                                               | UNCLEAR                                               | LOW                                                                                                                                                                                                                                                                 | LOW                                                                                                                                                                                                                                                                                                                                                                                              |                                                                                                      |
|            | Assessment justification:                      | NS                                                                                                                                                                    | NS                                                    | "...patients visited the research center after an overnight fast. Height, weight and waist circumference were measured."                                                                                                                                            | "All patients completed the whole study period of 18 months, there were no dropouts from the study."                                                                                                                                                                                                                                                                                             |                                                                                                      |
| <b>192</b> | <b>Solbrig 2018</b>                            | LOW                                                                                                                                                                   | UNCLEAR                                               | LOW                                                                                                                                                                                                                                                                 | LOW                                                                                                                                                                                                                                                                                                                                                                                              | UNCLEAR                                                                                              |
|            | Assessment justification:                      | "Participants were randomized to MI or FIT by the lead researcher using <a href="https://www.randomizer.org/">https://www.randomizer.org/</a> (random pairs option)." | NS                                                    | In the two posttreatment assessment sessions, research assistants (RAs) who were blind to the intervention group, collected and recorded primary outcomes. RAs blind to intervention measured waist and weight, and participants completed process measures online. | Attrition: less than 25% of participants in each arm at 6-month (programmes' end) and 12month.                                                                                                                                                                                                                                                                                                   | Both interventions were delivered individually by the lead author. Potential for contamination bias. |
| <b>193</b> | <b>Somers 2012</b>                             | LOW                                                                                                                                                                   | LOW                                                   | LOW                                                                                                                                                                                                                                                                 | LOW                                                                                                                                                                                                                                                                                                                                                                                              |                                                                                                      |

| Study ID |                           | Random sequence generation<br>(Selection bias)                                                                                                                                                                | Allocation concealment<br>(Selection bias)              | Blinding of outcome<br>assessment<br>(Detection bias)                                | Incomplete outcome data<br>(Attrition bias)                                                                                                                                                                                                                                                                                                                                                                                                                                                                                                                                                                                                                                                                                                                                                                   | Other bias |
|----------|---------------------------|---------------------------------------------------------------------------------------------------------------------------------------------------------------------------------------------------------------|---------------------------------------------------------|--------------------------------------------------------------------------------------|---------------------------------------------------------------------------------------------------------------------------------------------------------------------------------------------------------------------------------------------------------------------------------------------------------------------------------------------------------------------------------------------------------------------------------------------------------------------------------------------------------------------------------------------------------------------------------------------------------------------------------------------------------------------------------------------------------------------------------------------------------------------------------------------------------------|------------|
|          | Assessment justification: | "...a data technician unfamiliar with the research protocol used a random allocation computer software program to assign participants in blocks (minimum = 27, maximum = 39) to 1 of 4 treatment conditions." | Refer to 'Random sequence generation (selection bias)'. | "Weight was measured to the nearest 0.1 kg without shoes in the standing position. " | "Seventy percent (n = 163) of all randomized participants completed the 2-year study..."; "Twenty-four participants (6 from PCST-only, 10 from BWM-only, 4 from PCST + BWM, 4 from standard care) dropped out of the study after randomization but before treatment..."; "Participant dropouts at other study intervals were as follows: 20 participants dropped out before the posttreatment assessment (6 from PCST-only, 3 from BWM-only, 5 from PCST + BWM, 6 from standard care); 15 participants dropped out before the 6-month follow-up assessment (5 from PCST-only, 2 from BWMonly, 4 from PCST + BWM only, 4 from standard care); and 10 participants dropped out before the 12-month posttreatment assessment (4 from PCST-only, 4 from BWM-only, 2 from PCST + BWM only, 0 from standard care)." |            |
| 194      | Spring 2013               | LOW                                                                                                                                                                                                           | UNCLEAR                                                 | LOW                                                                                  | LOW                                                                                                                                                                                                                                                                                                                                                                                                                                                                                                                                                                                                                                                                                                                                                                                                           |            |

| Study ID   |                           | Random sequence generation<br>(Selection bias)                                                                                                                                                  | Allocation concealment<br>(Selection bias)                                                                                                                                | Blinding of outcome<br>assessment<br>(Detection bias)                                                                                                                                              | Incomplete outcome data<br>(Attrition bias)                                                                                                                                                                                                                                                                                                                                         | Other bias |
|------------|---------------------------|-------------------------------------------------------------------------------------------------------------------------------------------------------------------------------------------------|---------------------------------------------------------------------------------------------------------------------------------------------------------------------------|----------------------------------------------------------------------------------------------------------------------------------------------------------------------------------------------------|-------------------------------------------------------------------------------------------------------------------------------------------------------------------------------------------------------------------------------------------------------------------------------------------------------------------------------------------------------------------------------------|------------|
|            | Assessment justification: | "...computer generated using the method of randomly permuted blocks."                                                                                                                           | NS                                                                                                                                                                        | "Weight was measured with the participant dressed in light clothing with shoes off on a calibrated balance beam scale at randomization and at 3-, 6-, 9-, and 12-month follow-up."                 | Standard Group:<br>30/35 at 3mths;<br>28/35 at 6mths;<br>29/35 at 9mths;<br>27/35 at 12mths.<br><br>+ Mobile group:<br>30/34 at 3mths;<br>29/34 at 6mths;<br>27/34 at 12mths.<br><br>'The proportion of missing data ranged from 13.0% to 21.7% across post randomization assessment periods, and the proportion of participants who attended all 4 outcome assessments was 73.9%.' |            |
| <b>195</b> | <b>Spring 2017</b>        | LOW                                                                                                                                                                                             | LOW                                                                                                                                                                       | LOW                                                                                                                                                                                                | HIGH                                                                                                                                                                                                                                                                                                                                                                                |            |
|            | Assessment justification: | "Once all eligible participants of a cohort were assigned to a group, the three groups within each stratum were randomized by a statistician using a randomly permuted block with three cells." | "The statistician notified the project staff, who then revealed the treatment assignment (STND, TECH, or SELF) to participants during the first in-person group session." | "Body weight was measured without shoes on a calibrated balance beam scale at baseline and at 3, 6, and 12 months."                                                                                | "Attrition at the final 12-month follow-up assessment was greater for SELF (25.0%) than either STND (12.5%) or TECH (3.1%)." 21.9% difference in attrition rate at 12 months follow-up.                                                                                                                                                                                             |            |
| <b>196</b> | <b>Stahre 2005</b>        | UNCLEAR                                                                                                                                                                                         | UNCLEAR                                                                                                                                                                   | LOW                                                                                                                                                                                                | LOW                                                                                                                                                                                                                                                                                                                                                                                 |            |
|            | Assessment justification: | NS                                                                                                                                                                                              | NS                                                                                                                                                                        | "Weighing was always done without shoes and with light clothing using a calibrated scale. Those hospital personnel who were not participating in the study checked all the final weight measures." | Control:<br>36/43 at 6mths;<br>33/43 at 12mths;<br>31/43 at 18mths.<br><br>Treatment:<br>57/57 at 10-weeks;<br>47/57 at 6mths,<br>40/57 at 12mths;<br>34/57 at 18mths.                                                                                                                                                                                                              |            |
| <b>197</b> | <b>Stahre 2007</b>        | UNCLEAR                                                                                                                                                                                         | UNCLEAR                                                                                                                                                                   | LOW                                                                                                                                                                                                | HIGH                                                                                                                                                                                                                                                                                                                                                                                |            |

| Study ID   |                              | Random sequence generation<br>(Selection bias)                                                                                                                                                    | Allocation concealment<br>(Selection bias)                                                         | Blinding of outcome<br>assessment<br>(Detection bias)                                                                                                                                                                                                                            | Incomplete outcome data<br>(Attrition bias)                                                                                                                                                                                                                                | Other bias |
|------------|------------------------------|---------------------------------------------------------------------------------------------------------------------------------------------------------------------------------------------------|----------------------------------------------------------------------------------------------------|----------------------------------------------------------------------------------------------------------------------------------------------------------------------------------------------------------------------------------------------------------------------------------|----------------------------------------------------------------------------------------------------------------------------------------------------------------------------------------------------------------------------------------------------------------------------|------------|
|            | Assessment justification:    | NS                                                                                                                                                                                                | NS                                                                                                 | "The participants in the two programs were weighed and measured regarding height on the same occasions. Weighing of the participants was done using a calibrated scale with light clothing and without shoes. Two persons checked the measurements of the participants' weight." | Cognitive program group:<br>16/27 = 59% retained and commenced treatment, 1 woman did not complete program.<br><br>Control group:<br>26/27 = 96% retained and commenced treatment, 6 women did not complete program.<br>24/54 (44%) participants followed up at 12 months. |            |
| <b>198</b> | <b>Stalonas 1978</b>         | UNCLEAR                                                                                                                                                                                           | UNCLEAR                                                                                            | LOW                                                                                                                                                                                                                                                                              | LOW                                                                                                                                                                                                                                                                        |            |
|            | Assessment justification:    | "Subjects were randomly assigned to four groups (matched on age, sex, absolute weight, and overweight) in a 2 X 2 factorial design."                                                              | NS                                                                                                 | "The first part of each meeting was directed toward an extensive, individual review of performance records, charts, and weights with one of the two therapists."                                                                                                                 | "Of the 44 subjects completing the program, one subject was unavailable at the 3-month follow-up due to pregnancy, and two additional subjects had left the country at the 1-year follow-up."                                                                              |            |
| <b>199</b> | <b>Stenius-Aarniala 2000</b> | LOW                                                                                                                                                                                               | UNCLEAR                                                                                            | UNCLEAR                                                                                                                                                                                                                                                                          | LOW                                                                                                                                                                                                                                                                        |            |
|            | Assessment justification:    | Randomisation was by "shuffling cards", with the help of someone not involved in the study.                                                                                                       | Refer to 'Random sequence generation (selection bias)'.                                            | NS                                                                                                                                                                                                                                                                               | Control: 19/19<br>Treatment: 19/19                                                                                                                                                                                                                                         |            |
| <b>200</b> | <b>Stevens 1993</b>          | UNCLEAR                                                                                                                                                                                           | LOW                                                                                                | LOW                                                                                                                                                                                                                                                                              | LOW                                                                                                                                                                                                                                                                        |            |
|            | Assessment justification:    | "At clinics using the weight reduction intervention, randomization was conducted within high- and low-weight strata, with only high-weight participants eligible for the weight reduction group." | Centralized allocation by telephone; if not possible, sealed opaque envelopes.                     | "In addition, weights and blood pressures were recorded for all participants during official clinic visits 3, 6, 12, and 18 months after they entered the study."                                                                                                                | 93% followed up at 12 months overall:<br>93% intervention;<br>93% control.<br>Reasons for attrition not reported.                                                                                                                                                          |            |
| <b>201</b> | <b>Stevens 2001</b>          | UNCLEAR                                                                                                                                                                                           | LOW                                                                                                | LOW                                                                                                                                                                                                                                                                              | LOW                                                                                                                                                                                                                                                                        |            |
|            | Assessment justification:    | NS                                                                                                                                                                                                | Centralized allocation via telephone to central randomizing centre or via sealed opaque envelopes. | "Blood pressure and weight were measured every 6 months after randomization to the end of follow-up at 36, 42, or 48 months, depending on randomization date. Clinic staff                                                                                                       | 92% followed up at 18 months overall: 92% intervention, 92% control.<br>Reasons for attrition not reported.                                                                                                                                                                |            |

| Study ID   | Random sequence generation<br>(Selection bias) | Allocation concealment<br>(Selection bias)                                                                                                     | Blinding of outcome<br>assessment<br>(Detection bias)                                                                                                                                                                                                                                                                                                                                                                                                                           | Incomplete outcome data<br>(Attrition bias)                                                                                                                                                                                                                                                                                                                                                               | Other bias                                                                                                      |
|------------|------------------------------------------------|------------------------------------------------------------------------------------------------------------------------------------------------|---------------------------------------------------------------------------------------------------------------------------------------------------------------------------------------------------------------------------------------------------------------------------------------------------------------------------------------------------------------------------------------------------------------------------------------------------------------------------------|-----------------------------------------------------------------------------------------------------------------------------------------------------------------------------------------------------------------------------------------------------------------------------------------------------------------------------------------------------------------------------------------------------------|-----------------------------------------------------------------------------------------------------------------|
|            |                                                |                                                                                                                                                | who were blinded to study group assignment made these assessments."                                                                                                                                                                                                                                                                                                                                                                                                             |                                                                                                                                                                                                                                                                                                                                                                                                           |                                                                                                                 |
| <b>202</b> | <b>Stolley 2017</b>                            | LOW                                                                                                                                            | LOW                                                                                                                                                                                                                                                                                                                                                                                                                                                                             | LOW                                                                                                                                                                                                                                                                                                                                                                                                       | LOW                                                                                                             |
|            | Assessment justification:                      | "Women were randomly assigned using a random digit generator after the baseline interview."                                                    | "The allocation assignments for each site are generated using a SAS program written by the data analyst, who has no contact with participants. A few participants may be unable to complete the baseline visit before the main randomization round. In these cases, the data analyst prepares sealed, numbered envelopes containing the next allocation assignments for the site. As each woman completes her baseline visit, she is assigned the next envelope in the series." | "Weight was measured to the nearest 0.1 kg using a digital scale (Tanita; Arlington Heights, IL), with participants wearing light clothes without shoes. Two measurements for height and weight were taken; a discrepancy of more than 0.5 cm for height or 0.2 kg for weight resulted in a third measurement."                                                                                           | "Retention was 86% (n = 212) at 6 months and 84% (n = 206) at 12 months."                                       |
| <b>203</b> | <b>Strobl 2013</b>                             | LOW                                                                                                                                            | LOW                                                                                                                                                                                                                                                                                                                                                                                                                                                                             | LOW                                                                                                                                                                                                                                                                                                                                                                                                       | LOW                                                                                                             |
|            | Assessment justification:                      | "The random sequence was generated at the University of Würzburg by staff not working at the rehabilitation clinic, using a computer program." | "After having recruited a participant, clinic staff requested the randomization result from the scientific staff by phone (telephone randomization) thus guaranteeing concealment of randomization up to recruitment."                                                                                                                                                                                                                                                          | "Body weight was assessed by both self-reports and physician measurements (at 12 months). Both assessments were highly concordant (intraclass correlation coefficient 0.99), with patients reporting slightly lower weight than did physicians (mean difference = -0.61, (standard deviation (SD) 1.88)). For the outcome analysis, the physician measurement of body weight was used whenever possible." | Usual care:<br>203/239 at 6mths; 164/239 at 12mths<br><br>Intervention:<br>201/228 at 6mths; 177/228 at 12mths. |
| <b>204</b> | <b>Sundfor 2018</b>                            | LOW                                                                                                                                            | LOW                                                                                                                                                                                                                                                                                                                                                                                                                                                                             | LOW                                                                                                                                                                                                                                                                                                                                                                                                       | LOW                                                                                                             |

| Study ID   |                           | Random sequence generation<br>(Selection bias)                                                                                                                                                                                                                                                                                                                                                                         | Allocation concealment<br>(Selection bias)                                                                                                                                                                                                                        | Blinding of outcome<br>assessment<br>(Detection bias)                                                                                                                                                                                               | Incomplete outcome data<br>(Attrition bias)                                                                                                                                                                                                                                                                                                                                              | Other bias |
|------------|---------------------------|------------------------------------------------------------------------------------------------------------------------------------------------------------------------------------------------------------------------------------------------------------------------------------------------------------------------------------------------------------------------------------------------------------------------|-------------------------------------------------------------------------------------------------------------------------------------------------------------------------------------------------------------------------------------------------------------------|-----------------------------------------------------------------------------------------------------------------------------------------------------------------------------------------------------------------------------------------------------|------------------------------------------------------------------------------------------------------------------------------------------------------------------------------------------------------------------------------------------------------------------------------------------------------------------------------------------------------------------------------------------|------------|
|            | Assessment justification: | "A statistician prepared a computer-generated random number list."                                                                                                                                                                                                                                                                                                                                                     | "The project leader (TS) opened numbered and sealed envelopes consecutively with no exception."                                                                                                                                                                   | "Body weight was measured following a 10-h fast using the same calibrated digital scale to the nearest 0.1 kg."                                                                                                                                     | "As shown in the Consolidated Standards of Reporting Trials flow chart four dropouts occurred in the intermittent versus three in the continuous energy restriction group." Greater than 90% of participants returned for all follow-up time points.                                                                                                                                     |            |
| <b>205</b> | <b>Tapsell 2017</b>       | LOW                                                                                                                                                                                                                                                                                                                                                                                                                    | LOW                                                                                                                                                                                                                                                               | LOW                                                                                                                                                                                                                                                 | HIGH                                                                                                                                                                                                                                                                                                                                                                                     |            |
|            | Assessment justification: | "Randomisation was conducted after the second screen for eligibility and performed remotely by an investigator unrelated to the clinic using a computer generated randomisation sequence (STATA V12, StataCorp LP, College Station, TX). The randomisation was stratified according to sex and BMI (low BMI: $\leq 30$ and high BMI: $>30$ ). Randomisation was performed in randomly allocated blocks of 3, 6 or 9. " | "The randomisation list was provided to the study team who added eligible participants sequentially for each of the strata. The randomisation and participant database was only accessible by the HealthTrack study co-ordinator and administrator for security." | "Body weight (kg) was measured in an upright position in minimal clothing and without shoes using scales with a bio-electrical impedance component to also estimate body fat (%) (Tanita TBF-662, Wedderburn Pty Ltd., Ingleburn, NSW, Australia)." | "The intensive phase was completed by 298 participants (withdrawal rate 18%) and the 12 months follow-up by n=178 participants (withdrawal rate 39%)."<br><br>Total sample withdrawal rate at 12 months = $178/377*100 = 47\%$<br>12-month follow-up rate per group: Control: $61/126*100 = 48\%$ ;<br>Intervention: $45/120*100 = 36\%$ ; Intervention plus walnut: $72/126*100 = 57\%$ |            |
| <b>206</b> | <b>TarragaMarcos 2017</b> | UNCLEAR                                                                                                                                                                                                                                                                                                                                                                                                                | UNCLEAR                                                                                                                                                                                                                                                           | LOW                                                                                                                                                                                                                                                 | LOW                                                                                                                                                                                                                                                                                                                                                                                      |            |
|            | Assessment justification: | NS                                                                                                                                                                                                                                                                                                                                                                                                                     | NS                                                                                                                                                                                                                                                                | Weight objectively measured.<br><br>Blood pressure was measured using an automated and calibrated electronic device, according to the recommendations of the Spanish Society of Arterial Hypertension.                                              | There were no dropouts in G1 or G2 during the follow-up period, however 4 patients left G3 for personal reasons, leaving this group with 55 patients.                                                                                                                                                                                                                                    |            |
| <b>207</b> | <b>Teeriniemi 2018</b>    | LOW                                                                                                                                                                                                                                                                                                                                                                                                                    | UNCLEAR                                                                                                                                                                                                                                                           | LOW                                                                                                                                                                                                                                                 | LOW                                                                                                                                                                                                                                                                                                                                                                                      |            |



| Study ID   |                                           | Random sequence generation<br>(Selection bias)                                                                                                                                                                                                                                      | Allocation concealment<br>(Selection bias)                                                                                                                                                                                                                                          | Blinding of outcome<br>assessment<br>(Detection bias)                                                  | Incomplete outcome data<br>(Attrition bias)                                                                                                                                                                                                                                                                                                                                                          | Other bias                                                                                                                                                                                                                                                                                                                                                                                                                                                                                                                                                                       |
|------------|-------------------------------------------|-------------------------------------------------------------------------------------------------------------------------------------------------------------------------------------------------------------------------------------------------------------------------------------|-------------------------------------------------------------------------------------------------------------------------------------------------------------------------------------------------------------------------------------------------------------------------------------|--------------------------------------------------------------------------------------------------------|------------------------------------------------------------------------------------------------------------------------------------------------------------------------------------------------------------------------------------------------------------------------------------------------------------------------------------------------------------------------------------------------------|----------------------------------------------------------------------------------------------------------------------------------------------------------------------------------------------------------------------------------------------------------------------------------------------------------------------------------------------------------------------------------------------------------------------------------------------------------------------------------------------------------------------------------------------------------------------------------|
|            | Assessment justification:                 | "MS Excel was used by an independent researcher to produce a randomization list with random permuted blocks of 24."                                                                                                                                                                 | NS                                                                                                                                                                                                                                                                                  | Weight was measured by a study nurse.                                                                  | "A total of 108 participants (20.3%) did not return to the study centre for the 1-year visit (Fig. 2), and 49 participants dropped out between the 1-year and 2-year visits. Thus, 375 study subjects completed the study per protocol, and the attrition rate at 24 months was 29.5% (n = 157). No statistically significant differences amongst the dropouts were found between the study arms..." |                                                                                                                                                                                                                                                                                                                                                                                                                                                                                                                                                                                  |
| <b>208</b> | <b>ter Bogt 2009</b>                      | LOW                                                                                                                                                                                                                                                                                 | UNCLEAR                                                                                                                                                                                                                                                                             | LOW                                                                                                    | LOW                                                                                                                                                                                                                                                                                                                                                                                                  |                                                                                                                                                                                                                                                                                                                                                                                                                                                                                                                                                                                  |
|            | Assessment justification:                 | "... patients were allocated using computer-generated random numbers..."                                                                                                                                                                                                            | NS                                                                                                                                                                                                                                                                                  | "Body weight was measured on an electronic scale with subjects wearing light clothing and no shoes..." | Low dropout rate after 1 year (9%).                                                                                                                                                                                                                                                                                                                                                                  |                                                                                                                                                                                                                                                                                                                                                                                                                                                                                                                                                                                  |
| <b>209</b> | <b>The Look AHEAD Research Group 2010</b> | LOW                                                                                                                                                                                                                                                                                 | LOW                                                                                                                                                                                                                                                                                 | LOW                                                                                                    | LOW                                                                                                                                                                                                                                                                                                                                                                                                  | HIGH                                                                                                                                                                                                                                                                                                                                                                                                                                                                                                                                                                             |
|            | Assessment justification:                 | "Eligible participants are randomly assigned to either diabetes support and education or lifestyle intervention using a web-based data management system that verifies eligibility. Randomization is stratified by clinical center and blocked with random block sizes." (protocol) | "Eligible participants are randomly assigned to either diabetes support and education or lifestyle intervention using a web-based data management system that verifies eligibility. Randomization is stratified by clinical center and blocked with random block sizes." (protocol) | "Weight was measured in duplicate on a digital scale."                                                 | Retention rate:<br>Year 1:<br>DSE: 95.7%; ILI: 97.1%;<br>Year 2:<br>DSE: 93.5%; ILI: 94.9%;<br>Year 3:<br>DSE: 93.8%; ILI: 94.0%;<br>Year 4:<br>DSE: 93.0%; ILI: 94.1%;<br>Year 5:<br>DSE: 92.2%; ILI: 93.3%;<br>Year 6:<br>DSE: 90.6%; ILI: 92.0%;<br>Year 7:<br>DSE: 89.3%; ILI: 90.6%;<br>Year 8:<br>DSE: 88.3%; ILI: 89.9%.                                                                      | Participants in the intervention arm who, during the first 6 months, failed to lose 10% of their initial weight were offered a weight loss medication (orlistat). Those who lost <5% were encouraged by their lifestyle counselor to try pharmacotherapy, whereas those who lost 5.0% to 9.9% were informed of medication and could receive it on request. Medication was not offered to individuals who lost greater than or equal to 10% of initial weight and maintain the loss. 523 out of 2570 participants in the ILI study arm took Orlistat as part of the intervention. |

| Study ID   |                           | Random sequence generation<br>(Selection bias)                                                                                                                                                                                                                                                                                                                                                          | Allocation concealment<br>(Selection bias)                                                                                                                                                                                                                                                                                 | Blinding of outcome<br>assessment<br>(Detection bias)                                                          | Incomplete outcome data<br>(Attrition bias)                                                                                                                                                                                        | Other bias                                                                                                                                                                                                                                                                                                        |
|------------|---------------------------|---------------------------------------------------------------------------------------------------------------------------------------------------------------------------------------------------------------------------------------------------------------------------------------------------------------------------------------------------------------------------------------------------------|----------------------------------------------------------------------------------------------------------------------------------------------------------------------------------------------------------------------------------------------------------------------------------------------------------------------------|----------------------------------------------------------------------------------------------------------------|------------------------------------------------------------------------------------------------------------------------------------------------------------------------------------------------------------------------------------|-------------------------------------------------------------------------------------------------------------------------------------------------------------------------------------------------------------------------------------------------------------------------------------------------------------------|
| <b>210</b> | <b>Trepanowski 2017</b>   | LOW                                                                                                                                                                                                                                                                                                                                                                                                     | UNCLEAR                                                                                                                                                                                                                                                                                                                    | LOW                                                                                                            | LOW                                                                                                                                                                                                                                | HIGH                                                                                                                                                                                                                                                                                                              |
|            | Assessment justification: | "Randomization was performed by a stratified random sampling procedure by sex, age (18-42 years and 43-65 years), and body mass index (25.0-32.5 and 32.6- 39.9). Block size ranged from 1 to 11 participants."                                                                                                                                                                                         | NS                                                                                                                                                                                                                                                                                                                         | "...body weight, which was measured monthly via a digital scale while the participant was in a hospital gown." | 69.0% of participants completed the study. "The dropout rate was highest in the alternate-day fasting group (13 of 34 [38%]), relative to the daily calorie restriction group (10 of 35 [29%]) and control group (8 of 31 [26%])." | "Participants in the control group were instructed to maintain their weight throughout the trial and not to change their eating or physical activity habits... Controls who completed the 12-month trial received 3 months of free weight-loss counseling and a 12-month gym membership at the end of the study." |
| <b>211</b> | <b>Tsai 2010</b>          | UNCLEAR                                                                                                                                                                                                                                                                                                                                                                                                 | LOW                                                                                                                                                                                                                                                                                                                        | LOW                                                                                                            | LOW                                                                                                                                                                                                                                |                                                                                                                                                                                                                                                                                                                   |
|            | Assessment justification: | Randomization was blocked in groups of six.                                                                                                                                                                                                                                                                                                                                                             | Sealed envelopes.                                                                                                                                                                                                                                                                                                          | Weight was assessed by a research assistant (B.J.I.), who was not masked to treatment assignment.              | Control: 24/26 at 6mths; 25/26 at 12mths<br>Brief counselling: 21/24 at 6mths; 22/24 at 12mths                                                                                                                                     |                                                                                                                                                                                                                                                                                                                   |
| <b>212</b> | <b>Tuomilehto 2009</b>    | LOW                                                                                                                                                                                                                                                                                                                                                                                                     | LOW                                                                                                                                                                                                                                                                                                                        | LOW                                                                                                            | LOW                                                                                                                                                                                                                                |                                                                                                                                                                                                                                                                                                                   |
|            | Assessment justification: | "...the subjects were allocated randomly to two study groups by a study nurse according to a previously generated randomization plan.                                                                                                                                                                                                                                                                   | Randomised by study nurse who did not take part in subsequent intervention.                                                                                                                                                                                                                                                | The weight was measured at every visit.                                                                        | Control: 10% drop out<br>Intervention: 13% drop out                                                                                                                                                                                |                                                                                                                                                                                                                                                                                                                   |
| <b>213</b> | <b>van de Glind 2017</b>  | LOW                                                                                                                                                                                                                                                                                                                                                                                                     | LOW                                                                                                                                                                                                                                                                                                                        | LOW                                                                                                            | LOW                                                                                                                                                                                                                                | HIGH                                                                                                                                                                                                                                                                                                              |
|            | Assessment justification: | "The allocation sequence for each football club was generated by a computer programme written by a statistician not involved in the final analysis. The sequence was generated using randomised permuted blocks, stratified by club, with block lengths of 4 and 6, at random. The sequence was securely stored, with access restricted to those responsible for maintaining the randomisation system." | "Trial coordinators accessed randomisation allocation via a secure online portal."<br>"It was not possible to mask participants or the fieldwork team to allocation, but the primary outcome measurements could not be accessed by either, and allocation was not known by study statisticians until after database lock." | "Body weight was measured using an electronic flat scale (Tanita HD366) with light clothing."                  | 91% and 92% of participants per group attended the post program follow-up time point; 88% and 92% attended the 12-month follow-up.                                                                                                 | Wait-list control, no blinding.                                                                                                                                                                                                                                                                                   |
| <b>214</b> | <b>vanWier 2011</b>       | LOW                                                                                                                                                                                                                                                                                                                                                                                                     | LOW                                                                                                                                                                                                                                                                                                                        | LOW                                                                                                            | LOW                                                                                                                                                                                                                                |                                                                                                                                                                                                                                                                                                                   |

| Study ID |                           | Random sequence generation<br>(Selection bias)                                                                                                                                                                                                                                                                                                                                                                                                                                                                                               | Allocation concealment<br>(Selection bias)                                                                                                                                                                                                                                                                                                                                                                                                                                                                                 | Blinding of outcome<br>assessment<br>(Detection bias)                                                                                                                                                                                                                                                                                                                                                                                                                                                                                                                                                                                                              | Incomplete outcome data<br>(Attrition bias)                                                                                                                                                                                                                                                                                                                                                                                                                                                                     | Other bias |
|----------|---------------------------|----------------------------------------------------------------------------------------------------------------------------------------------------------------------------------------------------------------------------------------------------------------------------------------------------------------------------------------------------------------------------------------------------------------------------------------------------------------------------------------------------------------------------------------------|----------------------------------------------------------------------------------------------------------------------------------------------------------------------------------------------------------------------------------------------------------------------------------------------------------------------------------------------------------------------------------------------------------------------------------------------------------------------------------------------------------------------------|--------------------------------------------------------------------------------------------------------------------------------------------------------------------------------------------------------------------------------------------------------------------------------------------------------------------------------------------------------------------------------------------------------------------------------------------------------------------------------------------------------------------------------------------------------------------------------------------------------------------------------------------------------------------|-----------------------------------------------------------------------------------------------------------------------------------------------------------------------------------------------------------------------------------------------------------------------------------------------------------------------------------------------------------------------------------------------------------------------------------------------------------------------------------------------------------------|------------|
|          | Assessment justification: | After baseline measurements, the employee was randomised to one of the three study groups and either to a group receiving basic weight measurements (80% of each study group) or to a group receiving additional measurements (20% of each study group). This two-step randomisation meant that there were six groups an employee could be assigned to. Randomisation to these six groups was done by block randomisation, with each block containing 15 allocations. A computerized random number generator drew up an allocation schedule. | An administrative assistant put the group allocation in opaque sealed envelopes, numbered 1 to 1,500. These envelopes were taken to the locations of the baseline measurements and opened in the given order. The researchers were blinded for the allocation schedule, but were not blinded for allocation after randomisation. The participants were, in consequence of the nature of the intervention, not blinded for allocation after randomisation. Employees were not allowed to change groups after randomisation. | At baseline 'body weight and body height were assessed by the researchers.'<br>'Body weight and body height are assessed in all participants. Body weight is measured in kg, to the nearest 0.1 kg, with a digital scale (Seca 770; Seca GmbH & Co, Hamburg, Germany). Participants are wearing light clothing and no shoes. Body height is measured in m, to the nearest 0.001 m, with a portable stadiometer (Seca 214, Leicester Height Measure; Seca GmbH & Co, Hamburg, Germany).'<br>' LOW<br>In addition, in a questionnaire self-reported body weight is assessed. Participants are asked to weigh themselves wearing light clothing and no shoes.<br>HIGH | At 24mths:<br>Control 266/460<br>Internet 263/464<br>Phone 263/462<br>all <50%                                                                                                                                                                                                                                                                                                                                                                                                                                  |            |
| 215      | Viegener 1990             | UNCLEAR                                                                                                                                                                                                                                                                                                                                                                                                                                                                                                                                      | LOW                                                                                                                                                                                                                                                                                                                                                                                                                                                                                                                        | UNCLEAR                                                                                                                                                                                                                                                                                                                                                                                                                                                                                                                                                                                                                                                            | LOW                                                                                                                                                                                                                                                                                                                                                                                                                                                                                                             |            |
|          | Assessment justification: | "randomly assigned"<br>No further information given.                                                                                                                                                                                                                                                                                                                                                                                                                                                                                         | NS                                                                                                                                                                                                                                                                                                                                                                                                                                                                                                                         | NS                                                                                                                                                                                                                                                                                                                                                                                                                                                                                                                                                                                                                                                                 | Of the 85 subjects who began the program, 22 (11 from each condition) dropped out during the treatment phase of the study; and 3 clients (2 from the standard, 1 from the intermittent group) who completed treatment declined participation in the maintenance phase meetings. The between-group differences in both initial and overall attrition rates were not significant, and subjects who dropped out did not differ significantly on pretreatment measures of body weight or percentage overweight from |            |

| Study ID   | Random sequence generation<br>(Selection bias) | Allocation concealment<br>(Selection bias)                                                                                                                                                              | Blinding of outcome<br>assessment<br>(Detection bias) | Incomplete outcome data<br>(Attrition bias)                                                                                                           | Other bias                                                                                                                                                       |                                                                                |
|------------|------------------------------------------------|---------------------------------------------------------------------------------------------------------------------------------------------------------------------------------------------------------|-------------------------------------------------------|-------------------------------------------------------------------------------------------------------------------------------------------------------|------------------------------------------------------------------------------------------------------------------------------------------------------------------|--------------------------------------------------------------------------------|
|            |                                                |                                                                                                                                                                                                         |                                                       | those who completed the program (all ps > .20).                                                                                                       |                                                                                                                                                                  |                                                                                |
| <b>216</b> | <b>Vissers 2010</b>                            | UNCLEAR                                                                                                                                                                                                 | UNCLEAR                                               | LOW                                                                                                                                                   | LOW                                                                                                                                                              |                                                                                |
|            | Assessment justification:                      | NS                                                                                                                                                                                                      | NS                                                    | Body weight was measured with a digital scale to the nearest 0.1 kg.                                                                                  | Less than 50% attrition at 12-month follow-up.                                                                                                                   |                                                                                |
| <b>217</b> | <b>Volpe 2008</b>                              | UNCLEAR                                                                                                                                                                                                 | UNCLEAR                                               | LOW                                                                                                                                                   | UNCLEAR                                                                                                                                                          | HIGH                                                                           |
|            | Assessment justification:                      | "Participants were randomly assigned, in a stratified manner based on BMI, to one of three treatment conditions..."                                                                                     | NS                                                    | "Body weight was measured on a balance-beam scale accurate to 0.5 kg while the subject was wearing a swimsuit and no shoes."                          | NS                                                                                                                                                               | Raw data doesn't match up with information presented in graphs. Used raw data. |
| <b>218</b> | <b>von Gruenigen 2012</b>                      | UNCLEAR                                                                                                                                                                                                 | UNCLEAR                                               | LOW                                                                                                                                                   | LOW                                                                                                                                                              |                                                                                |
|            | Assessment justification:                      | "Randomization was stratified using block sizes of 6 or 8 by baseline BMI (25.0–39.9 versus >40)."                                                                                                      | NS                                                    | "The RD weighed participants in private at the beginning of each session and weekly food/activity records were reviewed."                             | "Attrition in the trial overall was 21.3%. Six (14.6%) patients in the LI group versus 10 (29.4%) in UC did not complete the twelve-month assessments, p=0.159." |                                                                                |
| <b>219</b> | <b>vonGruenigen 2008</b>                       | LOW                                                                                                                                                                                                     | UNCLEAR                                               | LOW                                                                                                                                                   | LOW                                                                                                                                                              |                                                                                |
|            | Assessment justification:                      | "Participants were randomly assigned to LI or UC. Randomization was stratified according to patient BMI (25- 39.9 versus >40 kg/m2) using a stratified blocked randomization scheme in order to achieve | NS                                                    | "Participants were weighed in street clothes without shoes on a Detecto hand rail scale (model #6855) and weight was recorded to the nearest 0.1 kg." | At 12-months:<br>Control: 18/22 Intervention:<br>17/23                                                                                                           |                                                                                |

| Study ID   | Random sequence generation<br>(Selection bias)                                                                                                                                                                   | Allocation concealment<br>(Selection bias) | Blinding of outcome<br>assessment<br>(Detection bias)                                                                                                                                                                                         | Incomplete outcome data<br>(Attrition bias)                                                                                                                                                                                                                                                                                                                                                              | Other bias |
|------------|------------------------------------------------------------------------------------------------------------------------------------------------------------------------------------------------------------------|--------------------------------------------|-----------------------------------------------------------------------------------------------------------------------------------------------------------------------------------------------------------------------------------------------|----------------------------------------------------------------------------------------------------------------------------------------------------------------------------------------------------------------------------------------------------------------------------------------------------------------------------------------------------------------------------------------------------------|------------|
|            | comparability between the study groups based on BMI..."                                                                                                                                                          |                                            |                                                                                                                                                                                                                                               |                                                                                                                                                                                                                                                                                                                                                                                                          |            |
| <b>220</b> | <b>Wadden 1986</b>                                                                                                                                                                                               | UNCLEAR                                    | UNCLEAR                                                                                                                                                                                                                                       | LOW                                                                                                                                                                                                                                                                                                                                                                                                      | LOW        |
|            | Assessment justification:<br><br>"Subjects were stratified into three blocks based on degree overweight and were randomly assigned to one of three treatment conditions..."<br><br>No further information given. | NS                                         | "The dependent variables were weekly measures of weight (balancebeam scale), blood pressure (Banmanometer 260 sphygmomanometer) and depression, as assessed by the Beck Depression Inventory (Beck, Ward, Mendelson, Mock, & Erbaugh, 1961)." | "The following analyses are all based on the 50 out of 59 subjects completing treatment. Attrition (15.3%) was spread evenly across conditions and included one pregnancy, three nondietrelated illnesses, and five work/transportation conflicts. A 1-year follow-up was completed on 48 of the 50 subjects finishing treatment (2 subjects in the combined treatment condition could not be reached)." |            |
| <b>221</b> | <b>Wadden 1994</b>                                                                                                                                                                                               | UNCLEAR                                    | UNCLEAR                                                                                                                                                                                                                                       | LOW                                                                                                                                                                                                                                                                                                                                                                                                      | LOW        |
|            | Assessment justification:<br><br>'randomly assigned'<br><br>No further information given.                                                                                                                        | NS                                         | Weight measured on a balance scale.                                                                                                                                                                                                           | BDD:<br>17/21 at week 26 and 52; 16/21 week 78<br>VLCD:<br>28/28 week 9;<br>26/28 at week 26; 23/28 at week 52; 21/28 at week 78.                                                                                                                                                                                                                                                                        |            |
| <b>222</b> | <b>Wadden 1998</b>                                                                                                                                                                                               | UNCLEAR                                    | UNCLEAR                                                                                                                                                                                                                                       | LOW                                                                                                                                                                                                                                                                                                                                                                                                      | LOW        |
|            | Assessment justification:<br><br>'randomly assigned'<br><br>No further information given.                                                                                                                        | NS                                         | Weight measured objectively.                                                                                                                                                                                                                  | 119/128 at week 8;<br>115/128 at week 17;<br>113/128 at week 24;<br>99/128 at week 48;<br>77/128 at 23-months.                                                                                                                                                                                                                                                                                           |            |
| <b>223</b> | <b>Wadden 2004</b>                                                                                                                                                                                               | UNCLEAR                                    | UNCLEAR                                                                                                                                                                                                                                       | LOW                                                                                                                                                                                                                                                                                                                                                                                                      | LOW        |
|            |                                                                                                                                                                                                                  |                                            |                                                                                                                                                                                                                                               |                                                                                                                                                                                                                                                                                                                                                                                                          | UNCLEAR    |

| Study ID |                           | Random sequence generation<br>(Selection bias) | Allocation concealment<br>(Selection bias) | Blinding of outcome<br>assessment<br>(Detection bias)                                                                                                                                                                             | Incomplete outcome data<br>(Attrition bias)                                                                                                                                                                                                                                                                                                                                         | Other bias                                                                                                                                                                                                                                                                                                                                                                                                           |
|----------|---------------------------|------------------------------------------------|--------------------------------------------|-----------------------------------------------------------------------------------------------------------------------------------------------------------------------------------------------------------------------------------|-------------------------------------------------------------------------------------------------------------------------------------------------------------------------------------------------------------------------------------------------------------------------------------------------------------------------------------------------------------------------------------|----------------------------------------------------------------------------------------------------------------------------------------------------------------------------------------------------------------------------------------------------------------------------------------------------------------------------------------------------------------------------------------------------------------------|
|          | Assessment justification: | NS                                             | NS                                         | “Body weight was measured using a balance-beam scale or an electronic digital scale (model 6800; Detecto). Participants were weighed in light clothing, without shoes, and were measured on the same scale throughout the study.” | Of the 43 women who were randomized to the BDD group, 37 (ie, 86%) remained in the study at week 20, 30 (70%) at week 40, and 26 (60%) at week 65.<br>Of the 41 MR participants, 37 (90%), 31 (76%), and 28 (68%) remained at weeks 20, 40, and 65, respectively. Corresponding numbers for the 39 participants assigned to ND were 38 (97%), 34 (89%), and 28 (74%), respectively. | "(We note that an additional 21 women were recruited into the study and randomly assigned to a pilot intervention. It examined the efficacy in inducing weight loss of individual brief behavioral treatment [ie 20–25 min sessions] provided once a month. Results of this group [which was included to assess a new method of managing obesity in primary care practice] will be described in a separate report.)" |
| 224      | Waleekhachonloet 2007     | UNCLEAR                                        | UNCLEAR                                    | LOW                                                                                                                                                                                                                               | LOW                                                                                                                                                                                                                                                                                                                                                                                 | UNCLEAR                                                                                                                                                                                                                                                                                                                                                                                                              |

| Study ID   |                           | Random sequence generation<br>(Selection bias) | Allocation concealment<br>(Selection bias) | Blinding of outcome<br>assessment<br>(Detection bias)                                                                                            | Incomplete outcome data<br>(Attrition bias)                                                                                                                         | Other bias                                                                                                                                                                                                                                                                                                                                                                      |
|------------|---------------------------|------------------------------------------------|--------------------------------------------|--------------------------------------------------------------------------------------------------------------------------------------------------|---------------------------------------------------------------------------------------------------------------------------------------------------------------------|---------------------------------------------------------------------------------------------------------------------------------------------------------------------------------------------------------------------------------------------------------------------------------------------------------------------------------------------------------------------------------|
|            | Assessment justification: | NS                                             | NS                                         | Weight and waist circumference was assessed at baseline, months 3, 6 and 12 by a digital weighing scale and tape meter.                          | Less than 50% attrition at 12-month follow-up and less than 20% attrition per group at 6-month follow-up.                                                           | "Contamination of interventions could occur because participants in each setting were randomly assigned to the two groups, and they were aware of their groups".<br><br>"The program providers shifted between individual behavior therapy and group behavior therapy every other week in order to eliminate the possible personal differences in providing the interventions." |
| <b>225</b> | <b>Weinstock 2013</b>     | UNCLEAR                                        | UNCLEAR                                    | LOW                                                                                                                                              | LOW                                                                                                                                                                 |                                                                                                                                                                                                                                                                                                                                                                                 |
|            | Assessment justification: | NS                                             | NS                                         | "At baseline, 6 months, 1 and 2 years, a research nurse performed standardized assessments at the practice sites and measured height, weight..." | Percentage of sample followed up:<br>6-months:<br>CC: 71%; IC: 65%<br>1 Year:<br>CC: 62%; IC: 57%<br>2 Years:<br>CC: 56%; IC: 48%<br>3 year:<br>Total sample: 51.4% |                                                                                                                                                                                                                                                                                                                                                                                 |
| <b>226</b> | <b>West 2007</b>          | UNCLEAR                                        | LOW                                        | LOW                                                                                                                                              | LOW                                                                                                                                                                 |                                                                                                                                                                                                                                                                                                                                                                                 |

| Study ID   |                           | Random sequence generation<br>(Selection bias)                                                                                                                                                                                                  | Allocation concealment<br>(Selection bias)                                        | Blinding of outcome<br>assessment<br>(Detection bias)                                                                                                                   | Incomplete outcome data<br>(Attrition bias)                                                                                                                                                                                                                                              | Other bias |
|------------|---------------------------|-------------------------------------------------------------------------------------------------------------------------------------------------------------------------------------------------------------------------------------------------|-----------------------------------------------------------------------------------|-------------------------------------------------------------------------------------------------------------------------------------------------------------------------|------------------------------------------------------------------------------------------------------------------------------------------------------------------------------------------------------------------------------------------------------------------------------------------|------------|
|            | Assessment justification: | NS                                                                                                                                                                                                                                              | "women were randomized using a sequentially numbered, closed-envelope procedure." | "All assessments were conducted by trained interviewers blind to experimental condition. Body weight was measured without shoes using a calibrated balance beam scale." | Less than 20% and 50% of attrition at mid- and longer follow-ups.                                                                                                                                                                                                                        |            |
| <b>227</b> | <b>West 2011</b>          | LOW                                                                                                                                                                                                                                             | UNCLEAR                                                                           | LOW                                                                                                                                                                     | LOW                                                                                                                                                                                                                                                                                      |            |
|            | Assessment justification: | "Senior centers were randomized by computer-generated random numbers to either a Lifestyle weight-loss program or to a cognitive training program designed to serve as an attention control, matched in contact time, duration, and structure." | NS                                                                                | "Body weight was measured in street clothes without shoes using a calibrated digital scale (Tanita BWB 800)..."                                                         | "Follow-up assessments were conducted with 211 older adults (93%) at 4 months."<br><br>4-months:<br>Intervention: $106/116 \times 100 = 91.4\%$ ; Control:<br>$96/112 \times 100 = 85.7\%$<br><br>12-months:<br>overall retention rate was 86% and there was no difference between arms. |            |
| <b>228</b> | <b>West 2016</b>          | LOW                                                                                                                                                                                                                                             | UNCLEAR                                                                           | LOW                                                                                                                                                                     | LOW                                                                                                                                                                                                                                                                                      |            |
|            | Assessment justification: | "Participants indicated availability for predetermined group times; these intact groups were stratified by baseline BMI percentile and then randomized using a biased coin approach."                                                           | NS                                                                                | "Weight change was the primary dependent measure. Weight was measured in street clothes, without shoes, on a calibrated digital scale."                                 | "Follow-up data were provided by 90% of randomized participants at 6 months and 81% at 18 months, with no difference between conditions in retention rates."                                                                                                                             |            |



| Study ID |                           | Random sequence generation<br>(Selection bias)                                                                                                                                                                                                                                                                                                                                                                                                                          | Allocation concealment<br>(Selection bias) | Blinding of outcome<br>assessment<br>(Detection bias)                                                                                                                                             | Incomplete outcome data<br>(Attrition bias)                                                                                                                                                                                                                                                                                                                                                                                                                                                                                  | Other bias                                                                                                                                                                                                                                                            |
|----------|---------------------------|-------------------------------------------------------------------------------------------------------------------------------------------------------------------------------------------------------------------------------------------------------------------------------------------------------------------------------------------------------------------------------------------------------------------------------------------------------------------------|--------------------------------------------|---------------------------------------------------------------------------------------------------------------------------------------------------------------------------------------------------|------------------------------------------------------------------------------------------------------------------------------------------------------------------------------------------------------------------------------------------------------------------------------------------------------------------------------------------------------------------------------------------------------------------------------------------------------------------------------------------------------------------------------|-----------------------------------------------------------------------------------------------------------------------------------------------------------------------------------------------------------------------------------------------------------------------|
| 229      | Whelton 1998              | UNCLEAR                                                                                                                                                                                                                                                                                                                                                                                                                                                                 | UNCLEAR                                    | LOW                                                                                                                                                                                               | HIGH                                                                                                                                                                                                                                                                                                                                                                                                                                                                                                                         | HIGH                                                                                                                                                                                                                                                                  |
|          | Assessment justification: | "Overweight participants are randomly assigned, in a 2 x 2 factorial design, to one of the following four groups..."<br>"Using a computer program, each participant's eligibility was confirmed prior to enrollment in the trial. Randomization was stratified by clinic and weight status to provide an even distribution of participants among the treatment groups at each site, and blocking of variable length (2, 4, and 8) was used to ensure temporal balance." | NS                                         | "Detailed information was collected at baseline, and an interval medical history (including medication information and symptoms) and measurements of body weight and BP were obtained quarterly." | The protocol clearly states consistent follow-up for 36-months, however the primary paper describes an average follow-up for the 585 patients in the weight loss/no weight loss groups.<br>"Study data were collected at the 4 eligibility and randomization contacts and at quarterly visits during follow-up from August 1992 until December 1995. Follow-up ranged from 15 to 36 months (median, 29 months)."<br>The number of participants followed up for each of the groups of interest at each time point in unclear. | Weight change data is only reported as two of the four groups, combined as follows: the non-weight loss group (Sodium Reduction and Usual Care) and the Weight loss group (Weight loss intervention and combined [sodium intervention and weight loss intervention]). |
| 230      | Wilson 2010               | LOW                                                                                                                                                                                                                                                                                                                                                                                                                                                                     | UNCLEAR                                    | UNCLEAR                                                                                                                                                                                           | HIGH                                                                                                                                                                                                                                                                                                                                                                                                                                                                                                                         |                                                                                                                                                                                                                                                                       |
|          | Assessment justification: | "Participants were randomly assigned to 1 of the 3 treatment conditions using a computer-generated sequence with stratification across treatments and within site based on high and low negative affect assessed by the Beck Depression Inventory (BDI)25 with a cutoff point of 18."                                                                                                                                                                                   | NS                                         | "Assessors were blinded to treatment condition", not clear if weight was self-reported.                                                                                                           | "At posttreatment, dropout rates were 7%, 28%, and 30% for the IPT, BWL, and CBTgsh groups, respectively. Interpersonal psychotherapy had a significantly lower attrition rate than either BWL or CBTgsh (F1,193=8.3; P.001)." At end of treatment 79.7% from BWL group compared to 90.7% from the IPT group completed assessments.                                                                                                                                                                                          |                                                                                                                                                                                                                                                                       |
| 231      | Wilson 2016               | UNCLEAR                                                                                                                                                                                                                                                                                                                                                                                                                                                                 | UNCLEAR                                    | LOW                                                                                                                                                                                               | LOW                                                                                                                                                                                                                                                                                                                                                                                                                                                                                                                          | UNCLEAR                                                                                                                                                                                                                                                               |
|          | Assessment justification: | Randomization of worksites into conditions. No further information given.                                                                                                                                                                                                                                                                                                                                                                                               | NS                                         | Weight objectively measured.                                                                                                                                                                      | Control: 147/234;<br>Phone 165/233;<br>Group 106/182<br><br>"drop out of approximately 40% of enrolled participants"                                                                                                                                                                                                                                                                                                                                                                                                         | No indication that results were adjusted for clustering, and one worksite per condition                                                                                                                                                                               |
| 232      | Wilson 2016b              | UNCLEAR                                                                                                                                                                                                                                                                                                                                                                                                                                                                 | UNCLEAR                                    | LOW                                                                                                                                                                                               | HIGH                                                                                                                                                                                                                                                                                                                                                                                                                                                                                                                         | HIGH                                                                                                                                                                                                                                                                  |

| Study ID |                           | Random sequence generation<br>(Selection bias)                                                                                                                                      | Allocation concealment<br>(Selection bias) | Blinding of outcome<br>assessment<br>(Detection bias)                                                   | Incomplete outcome data<br>(Attrition bias)                                                                                                                                                                                                                                                                                                                                                                                                                                                                                                                                                                                                                                                                                                                                                                                                                                                                                                                                                                                                                                                                                                                                                       | Other bias                                                                                                                                                                                                                                                                                                                                                                                                                                                                                                                                                                                                                                                                                                                                                                                                                                                                                                                                                                                                                                                                  |
|----------|---------------------------|-------------------------------------------------------------------------------------------------------------------------------------------------------------------------------------|--------------------------------------------|---------------------------------------------------------------------------------------------------------|---------------------------------------------------------------------------------------------------------------------------------------------------------------------------------------------------------------------------------------------------------------------------------------------------------------------------------------------------------------------------------------------------------------------------------------------------------------------------------------------------------------------------------------------------------------------------------------------------------------------------------------------------------------------------------------------------------------------------------------------------------------------------------------------------------------------------------------------------------------------------------------------------------------------------------------------------------------------------------------------------------------------------------------------------------------------------------------------------------------------------------------------------------------------------------------------------|-----------------------------------------------------------------------------------------------------------------------------------------------------------------------------------------------------------------------------------------------------------------------------------------------------------------------------------------------------------------------------------------------------------------------------------------------------------------------------------------------------------------------------------------------------------------------------------------------------------------------------------------------------------------------------------------------------------------------------------------------------------------------------------------------------------------------------------------------------------------------------------------------------------------------------------------------------------------------------------------------------------------------------------------------------------------------------|
|          | Assessment justification: | “Six sites were matched based on the number of employees and randomly assigned to treatment or control groups.’<br>‘Randomization of worksites into intervention or control groups” | NS                                         | Weight objectively measured. Self-reported secondary outcomes (e.g. food intake and physical activity). | 199 participants in the intervention sites and 46 participants at the control sites did not complete additional measures (post-test or follow-up) and were excluded from the final analyses. At the post-test, 236 participated in the intervention (39 who joined after baseline) and 359 participated in the control (52 who joined after baseline). At follow-up, 136 participants in the intervention group and 211 in the control group completed the surveys and measures. Removing the one control group from the final analysis because of contamination resulted in 227 (49.5%) participants in the final intervention and 135 (69.9%) in the final control cohort for outcome analyses.<br>“LGM analyses controlled for group differences by examining change over time and maximized the number of participants in the final cohort.”<br><br>“LGM analyses that controlled for group differences by examining change over time and maximized the number of participants in the final cohort. “<br>“Limitations of the study included ...dropout of approximately half of the participants from the study; ... LGM analyses, which enable imputation of data based on two data points “ | ‘An additional 39 employees at the intervention sites and 76 employees from the control sites joined the study prior to the post-test, resulting in 236 and 359 participants respectively at post-test.’?<br>‘Need to include all interested participants regardless of risk status, which likely diluted the impact.’<br>‘204 participants were excluded from analysis due to site deviation from protocol.’ (‘One control group experienced what Cook and Campbell referred to as compensatory rivalry. Contrary to study protocols, the site coordinator initiated a variety of intervention strategies (i.e., biggest loser contest, motivational interviewing sessions, group educational sessions) to “make their site look better,” according to an interview that was conducted with the site coordinator. This created a threat to the internal validity of the study, and as a result the site was removed from the final analyses. It could not be included as part of the treatment condition, as the strategies used differed from the planned intervention.’) |
| 233      | Wing 1985                 | UNCLEAR                                                                                                                                                                             | UNCLEAR                                    | LOW                                                                                                     | LOW                                                                                                                                                                                                                                                                                                                                                                                                                                                                                                                                                                                                                                                                                                                                                                                                                                                                                                                                                                                                                                                                                                                                                                                               |                                                                                                                                                                                                                                                                                                                                                                                                                                                                                                                                                                                                                                                                                                                                                                                                                                                                                                                                                                                                                                                                             |

| Study ID   |                           | Random sequence generation<br>(Selection bias) | Allocation concealment<br>(Selection bias) | Blinding of outcome<br>assessment<br>(Detection bias)                                                                                          | Incomplete outcome data<br>(Attrition bias)                                                                                                                                    | Other bias                                                                                                                                                                                                                                                                                                                                                                                                                                                                             |
|------------|---------------------------|------------------------------------------------|--------------------------------------------|------------------------------------------------------------------------------------------------------------------------------------------------|--------------------------------------------------------------------------------------------------------------------------------------------------------------------------------|----------------------------------------------------------------------------------------------------------------------------------------------------------------------------------------------------------------------------------------------------------------------------------------------------------------------------------------------------------------------------------------------------------------------------------------------------------------------------------------|
|            | Assessment justification: | NS                                             | NS                                         | Weight objectively measured.                                                                                                                   | 94% retention rate at 16-month follow-up.                                                                                                                                      |                                                                                                                                                                                                                                                                                                                                                                                                                                                                                        |
| <b>234</b> | <b>Wing 1988</b>          | UNCLEAR                                        | UNCLEAR                                    | LOW                                                                                                                                            | LOW                                                                                                                                                                            | UNCLEAR                                                                                                                                                                                                                                                                                                                                                                                                                                                                                |
|            | Assessment justification: | NS                                             | NS                                         | Weight was measured in street clothes, without shoes, using a balance beam scale.                                                              | Attrition less than 20% at program's end and less than 50% at 1-year follow-up                                                                                                 | Participants have been omitted from the analysis both at baseline and 10-week program end.                                                                                                                                                                                                                                                                                                                                                                                             |
| <b>235</b> | <b>Wing 1988b</b>         | UNCLEAR                                        | UNCLEAR                                    | LOW                                                                                                                                            | LOW                                                                                                                                                                            |                                                                                                                                                                                                                                                                                                                                                                                                                                                                                        |
|            | Assessment justification: | NS                                             | NS                                         | Weight was measured in street clothes, without shoes, using a balance beam scale.                                                              | Less than 20% attrition at post-intervention follow-up and less than 50% of attrition at 1-year follow-up.                                                                     |                                                                                                                                                                                                                                                                                                                                                                                                                                                                                        |
| <b>236</b> | <b>Wing 1991</b>          | UNCLEAR                                        | UNCLEAR                                    | LOW                                                                                                                                            | LOW                                                                                                                                                                            |                                                                                                                                                                                                                                                                                                                                                                                                                                                                                        |
|            | Assessment justification: | NS                                             | NS                                         | Weight was measured in street clothes, without shoes, using a balance beam scale.                                                              | Thirty-three (92%) of the 36 subjects completed both the posttreatment (week 20) and 1-year assessments (16/19 who entered the BT group and 17/17 who entered the VLCD group). |                                                                                                                                                                                                                                                                                                                                                                                                                                                                                        |
| <b>237</b> | <b>Wing 1996</b>          | UNCLEAR                                        | UNCLEAR                                    | LOW                                                                                                                                            | LOW                                                                                                                                                                            | UNCLEAR                                                                                                                                                                                                                                                                                                                                                                                                                                                                                |
|            | Assessment justification: | NS                                             | NS                                         | Weight was assessed at the start of the program, the end of the product (26 weeks-6-months) and 1-year follow-up. Weight objectively measured. | 91% (n=148 out of 163) participated at program's end (26-week, 6-months). n=146 participated at 1-year follow-up.                                                              | At the end of 26-weeks, subjects were given an opportunity to participate in a yearlong maintenance study examining either the effects of phone contact (Minnesota) or the effects of optional purchase of food boxes (Pennsylvania). Details of the maintenance study will be published separately, but neither maintenance strategy significantly affected weight change over the year of FU nor showed interactions with the initial 26-week study (p. 58, in pdf document page 3). |

| Study ID   | Random sequence generation<br>(Selection bias) | Allocation concealment<br>(Selection bias)                                                                                                                                                   | Blinding of outcome<br>assessment<br>(Detection bias)        | Incomplete outcome data<br>(Attrition bias) | Other bias                                                                                                                                               |         |
|------------|------------------------------------------------|----------------------------------------------------------------------------------------------------------------------------------------------------------------------------------------------|--------------------------------------------------------------|---------------------------------------------|----------------------------------------------------------------------------------------------------------------------------------------------------------|---------|
|            |                                                |                                                                                                                                                                                              |                                                              |                                             | Unclear how many participants chose to participate in the maintenance study.                                                                             |         |
| <b>238</b> | <b>Wing 1998</b>                               | UNCLEAR                                                                                                                                                                                      | UNCLEAR                                                      | LOW                                         | LOW                                                                                                                                                      |         |
|            | Assessment justification:                      | NS                                                                                                                                                                                           | NS                                                           | Weight objectively measured.                | Less than 50% attrition at 12-month follow-up.                                                                                                           |         |
| <b>239</b> | <b>Wing 2003</b>                               | UNCLEAR                                                                                                                                                                                      | UNCLEAR                                                      | LOW                                         | LOW                                                                                                                                                      |         |
|            | Assessment justification:                      | NS                                                                                                                                                                                           | NS                                                           | Weight objectively measured.                | Similar LTFU across groups; 68% follow-up at 11-months.                                                                                                  |         |
| <b>240</b> | <b>Wing 2010</b>                               | LOW                                                                                                                                                                                          | LOW                                                          | LOW                                         | LOW                                                                                                                                                      |         |
|            | Assessment justification:                      | "Randomization was performed with the use of randomly permuted blocks of three or six, stratified according to clinical center, with random assignment concealed in tamper-proof envelopes." | Refer to 'Random sequence generation (selection bias)'.<br>. | Weight objectively measured.                | "Assessments were attended by 94%, 90% and 86% of women at 6, 12 and 18 months, respectively, with no significant differences between treatment groups." |         |
| <b>241</b> | <b>Yannakoulia 2008</b>                        | UNCLEAR                                                                                                                                                                                      | UNCLEAR                                                      | UNCLEAR                                     | HIGH                                                                                                                                                     | UNCLEAR |

| Study ID |                           | Random sequence generation<br>(Selection bias) | Allocation concealment<br>(Selection bias) | Blinding of outcome<br>assessment<br>(Detection bias) | Incomplete outcome data<br>(Attrition bias)                                                                                                                                                                                                                                                                                                                                                                                                                                                                                                                                                                                                                                                                                                                                                                                                                                                                                                                                                                                             | Other bias                                                                                                                                                                                                                                                                                         |
|----------|---------------------------|------------------------------------------------|--------------------------------------------|-------------------------------------------------------|-----------------------------------------------------------------------------------------------------------------------------------------------------------------------------------------------------------------------------------------------------------------------------------------------------------------------------------------------------------------------------------------------------------------------------------------------------------------------------------------------------------------------------------------------------------------------------------------------------------------------------------------------------------------------------------------------------------------------------------------------------------------------------------------------------------------------------------------------------------------------------------------------------------------------------------------------------------------------------------------------------------------------------------------|----------------------------------------------------------------------------------------------------------------------------------------------------------------------------------------------------------------------------------------------------------------------------------------------------|
|          | Assessment justification: | NS                                             | NS                                         | NS                                                    | <p>Fifty percent of patients were dropouts. Comparisons between completers and dropouts revealed no statistically significant differences between the two groups (with regards to history of diabetes, sex, HbA1c, BMI or waist circumference), apart from their age, with those not completing the intervention being younger compared to completers (<math>53 \pm 9</math> vs. <math>60 \pm 9</math> yr, <math>p = 0.05</math>) (Table 2). A trend for an association between group and dropout was observed: 66.7% in the UC and 33.3% in the IC were dropouts (<math>p = 0.07</math>).</p> <p>To explore the effect of several factors in relation to the likelihood of being a dropout, a logistic regression was performed. Older people (<math>p = 0.03</math>) and those with newly diagnosed T2DM (<math>p = 0.05</math>) were more likely to complete the program, whereas a tendency for a negative association between attendance of the IC group and the likelihood of dropping out was found (<math>p = 0.08</math>).</p> | "They were also informed about smoking risks and encouraged to stop or limit smoking" but no information on how many smoked and if smoking behaviour changed and no other mentions of smoking in the paper. This could be a potential confounder but without this information difficult to assess. |
| 242      | Yardley 2014              | LOW                                            | LOW                                        | HIGH                                                  | LOW                                                                                                                                                                                                                                                                                                                                                                                                                                                                                                                                                                                                                                                                                                                                                                                                                                                                                                                                                                                                                                     | HIGH                                                                                                                                                                                                                                                                                               |

| Study ID |                           | Random sequence generation<br>(Selection bias)                                                                                                                                                                                                                              | Allocation concealment<br>(Selection bias)                                                                                                      | Blinding of outcome<br>assessment<br>(Detection bias)                                                                                                                            | Incomplete outcome data<br>(Attrition bias) | Other bias                                                                                                                                                                                                                                                                                                                                                                                                                                                                                                                                                                                                                                                                                                                                                                                                                                                                                                                                                             |
|----------|---------------------------|-----------------------------------------------------------------------------------------------------------------------------------------------------------------------------------------------------------------------------------------------------------------------------|-------------------------------------------------------------------------------------------------------------------------------------------------|----------------------------------------------------------------------------------------------------------------------------------------------------------------------------------|---------------------------------------------|------------------------------------------------------------------------------------------------------------------------------------------------------------------------------------------------------------------------------------------------------------------------------------------------------------------------------------------------------------------------------------------------------------------------------------------------------------------------------------------------------------------------------------------------------------------------------------------------------------------------------------------------------------------------------------------------------------------------------------------------------------------------------------------------------------------------------------------------------------------------------------------------------------------------------------------------------------------------|
|          | Assessment justification: | “Participants were then automatically randomised to one of the four groups by a computer algorithm that employed stratification by waist (allocating to the lower weight group if waist < 88 cm for women, < 102 cm for men), and a block size of 60 within each practice.” | “The computer system immediately informed participants which group they had been allocated to, and sent an email to inform the practice nurse.” | Intention was to weigh all participants in practice but due to low levels of attendance, self-report measures were completed at 12 months by a little less than half the sample. | Majority of participants followed-up at 12m | Two practices deviated from protocol by providing considerable weight management support to their usual care patients. Having detected substantial deviations from trial protocol in two practices, these analyses were repeated for the three practices that had followed the protocol correctly. We therefore carried out additional analyses of outcomes in the three practices that had followed protocol by not offering additional nurse support to those in the usual care group (see per protocol analyses below). Even in the per protocol practices, the level of nurse contact was somewhat less than intended, especially in the regular nurse support group, and the level of phone and email contact was very low. There was a skewed distribution of nurse support. Using our revised follow-up procedures, the follow-up for the primary outcome was increased slightly to 68.7% at 12 months, but the proportion having blood tests dropped to 36.9%. |
| 243      | Yates 2009                | LOW                                                                                                                                                                                                                                                                         | LOW                                                                                                                                             | LOW                                                                                                                                                                              | LOW                                         |                                                                                                                                                                                                                                                                                                                                                                                                                                                                                                                                                                                                                                                                                                                                                                                                                                                                                                                                                                        |

| Study ID   |                           | Random sequence generation<br>(Selection bias)                                                                                                                                                   | Allocation concealment<br>(Selection bias)                                                                                                                                                                                    | Blinding of outcome<br>assessment<br>(Detection bias)                                                                                                                             | Incomplete outcome data<br>(Attrition bias)                                                                                                                                                                                                                                                                                                                                                                                                                                                                                                                                                                                                                               | Other bias |
|------------|---------------------------|--------------------------------------------------------------------------------------------------------------------------------------------------------------------------------------------------|-------------------------------------------------------------------------------------------------------------------------------------------------------------------------------------------------------------------------------|-----------------------------------------------------------------------------------------------------------------------------------------------------------------------------------|---------------------------------------------------------------------------------------------------------------------------------------------------------------------------------------------------------------------------------------------------------------------------------------------------------------------------------------------------------------------------------------------------------------------------------------------------------------------------------------------------------------------------------------------------------------------------------------------------------------------------------------------------------------------------|------------|
|            | Assessment justification: | “Participants were randomly assigned, using a block design, to receive either usual care, the PREPARE program, or the PREPARE program without pedometer use and were stratified by age and sex.” | “Participant random assignment was conducted using opaque envelopes and a randomly generated number sequence by a member of our research team with no prior knowledge of recruited individuals other than their age and sex.” | Weight measured objectively.<br>Waist circumference: midpoint between the lower costal margin and iliac crest;<br>Height: measured to the nearest 0.1 kg and 0.5cm, respectively. | Less than 50% attrition at 12-month follow-up.                                                                                                                                                                                                                                                                                                                                                                                                                                                                                                                                                                                                                            |            |
| <b>244</b> | <b>Yates 2018</b>         | UNCLEAR                                                                                                                                                                                          | UNCLEAR                                                                                                                                                                                                                       | LOW                                                                                                                                                                               | HIGH                                                                                                                                                                                                                                                                                                                                                                                                                                                                                                                                                                                                                                                                      |            |
|            | Assessment justification: | NS                                                                                                                                                                                               | NS                                                                                                                                                                                                                            | Weight objectively measured.                                                                                                                                                      | 7/8 no lifestyle and 4/7 lifestyle followed up at one year.                                                                                                                                                                                                                                                                                                                                                                                                                                                                                                                                                                                                               |            |
| <b>245</b> | <b>Yeh 2003</b>           | LOW                                                                                                                                                                                              | LOW                                                                                                                                                                                                                           | LOW                                                                                                                                                                               | HIGH                                                                                                                                                                                                                                                                                                                                                                                                                                                                                                                                                                                                                                                                      |            |
|            | Assessment justification: | Randomly assigned to one of two behavioral interventions using SAS software. Assignment to treatment group was made by a data analyst who had no contact with study subjects.                    | Subjects and investigators neither knew of treatment assignment in advance of eligibility assessment nor exercised any control over treatment assignment.                                                                     | All outcome measures were collected by research assistants blinded to subjects’ treatment assignment.                                                                             | CBI<br>At 6mths 25/37. LOW. At 12mths 14/37. HIGH.<br>At 24mths 14/37. HIGH<br>SBI<br>At 6mths 24/35. LOW At 12mths 14/35. HIGH.<br>At 24mths 13/35. HIGH<br><br>“Of the 80 women randomly assigned, 72 (90%) women were available for baseline assessments, 49 (61.3%) remained at the 6-month assessment, 28 (35%) at 1 y and 27 (33.8%) at the end of the 2-y period. Of the subjects who returned at the 2y follow-up, 14 (51.9%) were from the CBI (control) group and 13 (48.1%) were from the SBI (intervention) group. The proportion of dropouts did not differ significantly between the groups at the 2-y follow-up (chi2, P = 0.95). t-Test analysis revealed |            |

| Study ID   |                           | Random sequence generation<br>(Selection bias)                                                                                                                              | Allocation concealment<br>(Selection bias) | Blinding of outcome<br>assessment<br>(Detection bias)                                                                                                                                          | Incomplete outcome data<br>(Attrition bias)                                                                                                                                                                                                                                                        | Other bias |
|------------|---------------------------|-----------------------------------------------------------------------------------------------------------------------------------------------------------------------------|--------------------------------------------|------------------------------------------------------------------------------------------------------------------------------------------------------------------------------------------------|----------------------------------------------------------------------------------------------------------------------------------------------------------------------------------------------------------------------------------------------------------------------------------------------------|------------|
|            |                           |                                                                                                                                                                             |                                            |                                                                                                                                                                                                | that those who returned for follow-up and those who were lost to follow-up did not differ significantly with regard to age, baseline BMI, baseline weight, or baseline nutritional variables including total calories consumed, total fat, percent fat, and cholesterol intakes (data not shown).' |            |
| <b>246</b> | <b>Yeh 2016</b>           | UNCLEAR                                                                                                                                                                     | UNCLEAR                                    | UNCLEAR                                                                                                                                                                                        | LOW                                                                                                                                                                                                                                                                                                |            |
|            | Assessment justification: | NS                                                                                                                                                                          | NS                                         | "Anthropometric measures and fasting blood specimens were obtained at baseline, 6 months and 12 months to evaluate weight and cardiometabolic changes."                                        | Attrition was less than 50% follow-up and there was a <20% difference in follow-up between groups at 6m.                                                                                                                                                                                           |            |
| <b>247</b> | <b>Yin 2018</b>           | LOW                                                                                                                                                                         | UNCLEAR                                    | LOW                                                                                                                                                                                            | LOW                                                                                                                                                                                                                                                                                                |            |
|            | Assessment justification: | Participants were randomised in blocks of 10, using a randomization table by the study statistician. Enrollment and randomization were performed by trained research staff. | NS                                         | Trained research staff measured the participant's weight, height and waist circumference with light clothes twice and the average was used. Participant's weight was recorded at each meeting. | Less than 50% of attrition (at 12 months, 19 int. and 5 cont. loss-to-follow-up)                                                                                                                                                                                                                   |            |



| Study ID                                                                                                                                                                                                                                                |                           | Random sequence generation<br>(Selection bias)                                                                                                                                       | Allocation concealment<br>(Selection bias) | Blinding of outcome<br>assessment<br>(Detection bias) | Incomplete outcome data<br>(Attrition bias)                                                                                                                                                                                                                                                                                               | Other bias |
|---------------------------------------------------------------------------------------------------------------------------------------------------------------------------------------------------------------------------------------------------------|---------------------------|--------------------------------------------------------------------------------------------------------------------------------------------------------------------------------------|--------------------------------------------|-------------------------------------------------------|-------------------------------------------------------------------------------------------------------------------------------------------------------------------------------------------------------------------------------------------------------------------------------------------------------------------------------------------|------------|
| 248                                                                                                                                                                                                                                                     | Zhang 2016                | LOW                                                                                                                                                                                  | UNCLEAR                                    | LOW                                                   | LOW                                                                                                                                                                                                                                                                                                                                       |            |
|                                                                                                                                                                                                                                                         | Assessment justification: | The randomization schedules were generated using SAS PROC PLAN in SAS statistical software (SAS Institute Inc) and concealed until an eligible participant was ready for enrollment. | NS                                         | Weight measured objectively.                          | Of 220, 211 (95.9%) completed the 6-month follow-up visit, and 208 (94.5%) completed the 12-month follow-up visit. ITT was followed, undertaking MCMC imputation method.                                                                                                                                                                  |            |
| 249                                                                                                                                                                                                                                                     | Zwickert 2016             | LOW                                                                                                                                                                                  | UNCLEAR                                    | LOW                                                   | HIGH                                                                                                                                                                                                                                                                                                                                      |            |
|                                                                                                                                                                                                                                                         | Assessment justification: | Participants were entered into a database sequentially and a computer-generated randomisation list was used to allocate participants to the CBT + ITS or CBT + MTS conditions.       | NS                                         | Weight measured objectively.                          | 15-month loss-to-follow-up >50% (15/31 ITS and 14/29 MTS follow-up at 15m)<br><br>Participants who dropped out of the CBT group treatment had significantly higher baseline weight and BMI than those who continued in the trial (113.8 ± 23.3 vs. 99.6 ± 18.8 kg, p = .019, and 41.1 ± 8.3 vs. 36.2 ± 5.4 kg/m <sup>2</sup> , p = .010). |            |
| <b>BP:</b> Blood pressure; <b>HDL-C:</b> High density lipoprotein cholesterol; <b>Mths:</b> Months; <b>NS:</b> Not specified; <b>PR:</b> Pulse rate; <b>RCT:</b> Randomised controlled trial; <b>Wk/s:</b> week/s; <b>Yr.:</b> Year; <b>Yrs:</b> Years. |                           |                                                                                                                                                                                      |                                            |                                                       |                                                                                                                                                                                                                                                                                                                                           |            |

**Table 3. Characteristics of included studies**

| Study ID                | Country:  | Follow-up time points (months): | Population                                                                                                                                                                                                                                      | Study groups and number of participants randomised                                                                             | Outcome measures extracted*                              | Overall Risk of Bias | Author contacted | Additional information obtained from author <sup>#</sup> : | Notes:                |
|-------------------------|-----------|---------------------------------|-------------------------------------------------------------------------------------------------------------------------------------------------------------------------------------------------------------------------------------------------|--------------------------------------------------------------------------------------------------------------------------------|----------------------------------------------------------|----------------------|------------------|------------------------------------------------------------|-----------------------|
| Abed 2013               | Australia | 3, 6, 9, 12, 15                 | Patients with symptomatic atrial fibrillation                                                                                                                                                                                                   | Control = 75<br>Weight management = 75                                                                                         | Weight; TC; HDL; SBP; FBG; Plasma insulin                | High                 | Y                | N                                                          |                       |
| Ackermann 2011          | USA       | 6, 14                           | DPP population                                                                                                                                                                                                                                  | Standard advice alone (controls) = 46<br>YMCA DPP intervention = 46                                                            | Weight; TC; HDL; SBP; HbA1C                              | Unclear              | N                | N/A                                                        |                       |
| Agras 1990              | USA       | 3, 6, 12                        | Overweight women without additional psychological disorders                                                                                                                                                                                     | Computer alone = 30<br>Computer + group support = 30<br>Behaviour therapy = 30                                                 | Weight                                                   | Unclear              | N                | N/A                                                        |                       |
| Ahern 2017              | UK        | 3, 12, 24                       | Adults with a BMI $\geq$ 28                                                                                                                                                                                                                     | Brief intervention = 211<br>12-week behavioural weight-loss programme = 530<br>52-week behavioural weight-loss programme = 528 | Weight; TC; SBP; HbA1C; QoL                              | Low                  | N                | N/A                                                        |                       |
| Almanza - Aguilera 2018 | Spain     | 3, 12                           | Metabolically healthy obese women (definition based on the general criteria proposed by the International Diabetes Federation (IDF))                                                                                                            | Control (general recommendations) = 48<br>Treatment (lifestyle weight loss intervention) = 67                                  | Weight; TC; HDL; SBP; FG                                 | High                 | Y                | Y                                                          | Information provided. |
| Ames 2005               | USA       | 3, 6, 12                        | College women who are overweight or obese                                                                                                                                                                                                       | Standard behavioural treatment = NS<br>Reformulated cognitive-behavioural treatment = NS                                       | Weight                                                   | High                 | N                | N/A                                                        |                       |
| Andersen 1999           | USA       | 1, 2, 3, 4, 16                  | Women with obesity                                                                                                                                                                                                                              | Diet + Lifestyle Activity = 20<br>Diet + Aerobic Group = 20                                                                    | Weight; TC:HDL ratio; TC; HDL; SBP                       | Unclear              | Y                | N                                                          |                       |
| Anderson 2014           | Scotland  | 3, 12                           | Overweight or obese adults (aged 50 to 74 years) who had undergone colonoscopy after a positive faecal occult blood test result, as part of the national bowel screening programme, and had a diagnosis of adenoma confirmed by histopathology. | Control (weight loss booklet only) = 166<br>Intervention (BeWEL) = 163                                                         | Weight; TC; HDL; SBP; HbA1C; HOMA-IR; FG; Plasma insulin | Low                  | N                | N/A                                                        |                       |
| Annesi 2016             | USA       | 3, 6, 12, 24                    | Women who are obese                                                                                                                                                                                                                             | Comparison treatment = 55<br>Experimental treatment = 55                                                                       | Weight                                                   | Unclear              | N                | N/A                                                        |                       |

| Study ID    | Country:  | Follow-up time points (months):                                                                                                                                                                          | Population                                                                                                                                                                                                                                                                                                      | Study groups and number of participants randomised                                                                                        | Outcome measures extracted*                                             | Overall Risk of Bias | Author contacted | Additional information obtained from author <sup>#</sup> : | Notes:                                       |
|-------------|-----------|----------------------------------------------------------------------------------------------------------------------------------------------------------------------------------------------------------|-----------------------------------------------------------------------------------------------------------------------------------------------------------------------------------------------------------------------------------------------------------------------------------------------------------------|-------------------------------------------------------------------------------------------------------------------------------------------|-------------------------------------------------------------------------|----------------------|------------------|------------------------------------------------------------|----------------------------------------------|
| Annesi 2017 | USA       | 3, 6, 12, 24                                                                                                                                                                                             | Women with class 1 or 2 obesity (BMI $\geq 30 < 40$ kg/m <sup>2</sup> ).                                                                                                                                                                                                                                        | Control comparison group = 54<br>Experimental group = 53                                                                                  | Weight                                                                  | Unclear              | N                | N/A                                                        | Information available from previous reviews. |
| Appel 2011  | USA       | 6, 12, 24                                                                                                                                                                                                | Adults who were at least 21 years of age with obesity and had one or more cardiovascular risk factors (hypertension, hypercholesterolemia, or diabetes).                                                                                                                                                        | Control (Self-directed) = 138<br>Remote Support Only (N/A) = 139<br>In-Person Support = 138                                               | Weight; TC; SBP; FG; QoL                                                | Low                  | N                | N/A                                                        | Information available from previous reviews. |
| Ard 2004    | USA       | 6, 18                                                                                                                                                                                                    | The target population consisted of generally healthy adults with above optimal BP including individuals with stage 1 hypertension who met Joint National Committee on Detection, Evaluation, and Treatment of High Blood Pressure (JNC-VI) criteria for at least a 6-month trial of nonpharmacological therapy. | “advice only” comparison group = 273<br>“established” behavioural intervention group = 268<br>Established + DASH Intervention Group = 269 | Weight; TC; SBP; FBG; Plasma insulin; QoL; Incidence HTN; Remission HTN | Low                  | N                | N/A                                                        | Information available from previous reviews. |
| Ard 2018    | USA       | 6, 12                                                                                                                                                                                                    | General population of adults aged 65 and older who were at risk for cardiometabolic disease due to obesity and associated risk factors                                                                                                                                                                          | Exercise Only = 54<br>Exercise + Diet Quality + Weight Maintenance = 55<br>Exercise + Diet Quality + Weight Loss = 55                     | Weight; TC; HDL; SBP; FG; QoL; Incidence CV morbidity                   | Low                  | N                | N/A                                                        | Information available from previous reviews. |
| Ash 2006    | Australia | 3, 6, 12                                                                                                                                                                                                 | General population and hospital referrals (one public hospital and one private hospital) overweight and obese                                                                                                                                                                                                   | Control Group - Booklet only = 63<br>Individualised Dietetic Treatment = 66<br>Fat Booters Incorporated = 62                              | Weight                                                                  | High                 | N                | N/A                                                        |                                              |
| Ashley 2001 | USA       | 0.46, 0.69, 0.92, 1.15, 1.38, 1.61, 1.84, 2.07, 2.3, 2.53, 2.76, 3, 3.22, 3.45, 3.68, 3.91, 4.14, 4.37, 4.6, 4.83, 5.06, 5.29, 5.52, 5.75, 6, 6.21, 6.44, 6.67, 6.9, 7.36, 7.83, 8.29, 8.75, 9.21, 9.67, | General population (premenopausal women)                                                                                                                                                                                                                                                                        | Control, Diet = 37<br>MR - Physician/Nurse led = 38<br>MR - Dietician led = 38                                                            | Weight; TC; HDL; SBP; FG; Plasma insulin                                | High                 | N                | N/A                                                        | Information available from previous reviews. |

| Study ID     | Country: | Follow-up time points (months):    | Population                                          | Study groups and number of participants randomised                                                                | Outcome measures extracted*     | Overall Risk of Bias | Author contacted | Additional information obtained from author <sup>†</sup> : | Notes:                                                        |
|--------------|----------|------------------------------------|-----------------------------------------------------|-------------------------------------------------------------------------------------------------------------------|---------------------------------|----------------------|------------------|------------------------------------------------------------|---------------------------------------------------------------|
|              |          | 10.13, 10.59, 11.05, 11.51, 12, 24 |                                                     |                                                                                                                   |                                 |                      |                  |                                                            |                                                               |
| Ashley 2007  | USA      | 6, 12                              | Generally healthy overweight/obese women            | Control - Traditional Food Group = 35<br>Meal Replacement Group = 35                                              | Weight                          | Unclear              | N                | N/A                                                        | Information available from previous reviews.                  |
| Aveyard 2016 | England  | 3, 12                              | General population                                  | Advice only = 942<br>Advice plus weight loss programme = 940                                                      | Weight                          | Low                  | N                | N/A                                                        |                                                               |
| Azar 2013    | USA      | 3, 6, 15, 24                       | Pre-diabetes and/or metabolic syndrome              | Control, Usual care = NS<br>Self-directed = NS<br>Coach-led = NS                                                  | Weight; TC; SBP; FG             | Low                  | Y                | N                                                          |                                                               |
| Bacon 2002   | USA      | 3, 6, 12, 24                       | Women from the general population                   | Health at Every Size – control = NS<br>Diet Group – intervention = NS                                             | Weight; TC; HDL; SBP; QoL       | Unclear              | N                | N/A                                                        | Information available from previous reviews.                  |
| Barnes 2017  | USA      | 3, 6, 15                           | Overweight and obese with or without binge eating   | Treatment as usual (N/A) = 30<br>Nutrition - ATTENTION CONTROL = 29<br>Motivational interviewing = 30             | Weight; TC; HDL; SBP; HbA1c; FG | Unclear              | Y                | Y                                                          | Information provided.                                         |
| Bartels 2015 | USA      | 3, 6, 9, 12, 18                    | People with serious mental illness                  | Control, Fitness club membership = 106<br>IN SHAPE = 104                                                          | Weight; TC; HDL; SBP            | Unclear              | N                | N/A                                                        | Information available from previous reviews.                  |
| Beavers 2017 | USA      | 6, 18                              | Community-dwelling men and women 60–79 years of age | Weight loss = 82<br>Weight loss + Aerobic training = 86<br>Weight loss + Resistance training = 81                 | Weight; QoL                     | Unclear              | Y                | Y                                                          | Author confirmed that they could not provide additional data. |
| Beeken 2017  | England  | 3, 6, 12, 18, 24                   | General population with obesity                     | Usual care = 270<br>10TT = 267                                                                                    | Weight; TC; SBP; FBG            | Low                  | Y                | Y                                                          | Information provided.                                         |
| Bennett 1986 | UK       | 4, 7, 10, 16                       | Females                                             | Group Contact Control = NS<br>Individual Contact Control = NS<br>Insight Control = NS<br>Cognitive Rehearsal = NS | Weight                          | Unclear              | N                | N/A                                                        |                                                               |
| Bennett 2012 | USA      | 6, 12, 18, 24                      | Obese patients receiving hypertensive treatment     | Control, Usual care = 185<br>Be Fit, Be Well = 180                                                                | Weight; SBP, QoL                | Unclear              | Y                | Y                                                          | Data provided; Information available from previous reviews.   |
| Bennett 2013 | USA      | 6, 12, 18                          | General population                                  | Control, usual care = 97                                                                                          | Weight; TC; HDL; SBP; FG; QoL   | Unclear              | Y                | Y                                                          | Data provided.                                                |

| Study ID       | Country:        | Follow-up time points (months): | Population                                                                                                                                                                                                         | Study groups and number of participants randomised                                                                                | Outcome measures extracted*                                            | Overall Risk of Bias | Author contacted | Additional information obtained from author <sup>†</sup> : | Notes:                                                      |
|----------------|-----------------|---------------------------------|--------------------------------------------------------------------------------------------------------------------------------------------------------------------------------------------------------------------|-----------------------------------------------------------------------------------------------------------------------------------|------------------------------------------------------------------------|----------------------|------------------|------------------------------------------------------------|-------------------------------------------------------------|
|                |                 |                                 |                                                                                                                                                                                                                    | Weight gain prevention intervention = 97                                                                                          |                                                                        |                      |                  |                                                            |                                                             |
| Berendsen 2011 | The Netherlands | 12, 24                          | Population with comorbidities or morbidly obese (BMI 35-40 kg/m <sup>2</sup> )                                                                                                                                     | Standard combined lifestyle intervention = 164<br>Supervised combined lifestyle intervention = 247                                | Weight                                                                 | Unclear              | Y                | Y                                                          | Data provided.                                              |
| Berry 2014     | USA             | 3, 12, 18                       | Parent and child dyad with overweight or obesity                                                                                                                                                                   | Control = 162<br>Family based. Nutrition, exercise and coping skills intervention = 184                                           | Weight; QoL                                                            | High                 | Y                | Y                                                          | Data provided; Information available from previous reviews. |
| Bertram 1990   | South Africa    | 4, 16                           | General population                                                                                                                                                                                                 | Control - diet only = 15<br>Diet plus lectures = 15<br>Diet plus exercise = 15                                                    | Weight; Incidence CV mortality                                         | High                 |                  |                                                            |                                                             |
| Bertz 2012     | Sweden          | 3, 12                           | Women, 8-12-week post-partum                                                                                                                                                                                       | Control = 17<br>Diet Only = 17<br>Exercise only = 18<br>Intervention = 16                                                         | Weight; TC; SBP; FG; QoL                                               | Unclear              |                  |                                                            | Information available from previous reviews.                |
| Beutel 2006    | Germany         | 1.5, 12, 36                     | Patients referred for inpatient psychosomatic rehabilitation by the health and pension insurance companies on the basis of obesity plus additional psychiatric morbidity and a reduced or threatened work capacity | Behavioural therapy = 130<br>Psychodynamic treatment = 137                                                                        | Weight                                                                 | Unclear              | N                | N/A                                                        |                                                             |
| Bliddal 2011   | Denmark         | 7.4, 8.3, 12                    | Overweight patients with primary knee osteoarthritis                                                                                                                                                               | Control, low-energy diet = 45<br>Intensive low-energy diet = 44                                                                   | Weight                                                                 | High                 | N                | N/A                                                        |                                                             |
| Bo 2007        | Italy           | 12, 24                          | General population (70-72% with metabolic syndrome)                                                                                                                                                                | Control standard care = 188<br>Intervention lifestyle by trained professional = 187                                               | Weight; TC; HDL; SBP; FG                                               | Low                  | N                | N/A                                                        |                                                             |
| Brown 2014     | USA             | 3, 6, 12                        | Clients at one of four community mental health programs, three in the Kansas City area and one in Las Vegas                                                                                                        | Control = 66<br>RENEW = 70                                                                                                        | Weight                                                                 | Unclear              | N                | N/A                                                        |                                                             |
| Burke 2005     | Australia       | 4, 16, 40                       | Hypertensive patients                                                                                                                                                                                              | Control usual care = 118<br>Low sodium + fish diet = 123                                                                          | Weight; TC; HDL; SBP; HOMA-IR; FBG; Plasma insulin; QoL; Remission HTN | Unclear              | Y                | Y                                                          | Information provided.                                       |
| Burke 2015     | USA             | 6, 12, 18                       | General population                                                                                                                                                                                                 | Standard behavioural weight loss treatment = 72<br>Self-efficacy enhancement plus standard behavioural weight loss treatment = 58 | Weight; QoL                                                            | Unclear              | N                | N/A                                                        |                                                             |

| Study ID         | Country:  | Follow-up time points (months): | Population                                                                                                                                          | Study groups and number of participants randomised                                                                                               | Outcome measures extracted*                              | Overall Risk of Bias | Author contacted | Additional information obtained from author <sup>†</sup> : | Notes:                                       |
|------------------|-----------|---------------------------------|-----------------------------------------------------------------------------------------------------------------------------------------------------|--------------------------------------------------------------------------------------------------------------------------------------------------|----------------------------------------------------------|----------------------|------------------|------------------------------------------------------------|----------------------------------------------|
| Cesa 2013        | Italy     | 1, 12                           | People with BED                                                                                                                                     | Integrated Multimodal Medically Managed Inpatient Program = 29<br>Cognitive Behavior Therapy = 30<br>VR-Enhanced Cognitive Behavior Therapy = 31 | Weight                                                   | High                 | N                | N/A                                                        |                                              |
| Chaiyasoot 2018  | Thailand  | 3, 8.75, 14.7                   | Obesity patients with metabolic syndrome                                                                                                            | Control, Lifestyle Education<br>Intervention = 52<br>Lifestyle Education Intervention plus Meal Replacements = 58                                | Weight; TC; HDL; SBP; HbA1c; HOMA-IR; FG; Plasma Insulin | Low                  | N                | N/A                                                        | Information available from previous reviews. |
| Chee 2017        | Malaysia  | 6, 12                           | Patients with type 2 diabetes                                                                                                                       | Usual Care = 115<br>tDNA Conventional Counseling = 57<br>tDNA Motivational Interviewing = 58                                                     | Weight; TC; HDL; SBP; HbA1c                              | Unclear              | Y                | N                                                          | Information available from previous reviews. |
| Cheskin 2008     | USA       | 8, 20                           | Adult men and women with type 2 diabetes                                                                                                            | Standard diet = 58<br>Meal replacement = 54                                                                                                      | Weight; TC; HDL; SBP; HbA1c; FG; plasma insulin;         | High                 | N                | N/A                                                        | Information available from previous reviews. |
| Cheyette 2007    | UK        | 4, 6, 12                        | Patients with type 2 diabetes on insulin treatment                                                                                                  | Control = 20<br>Weight No More intervention group = 29                                                                                           | Weight; HbA1c; QoL                                       | Unclear              | N                | N                                                          |                                              |
| Christensen 2012 | Denmark   | 3, 12                           | Female overweight healthcare workers                                                                                                                | Reference group = 44<br>Intervention group = 54                                                                                                  | Weight; SBP                                              | Low                  | N                | N/A                                                        |                                              |
| Cleo 2018        | Australia | 3, 12                           | General population                                                                                                                                  | Wait list control (N/A) = 25<br>TTT Top Ten Tips habit formation = 25<br>DSD Do Something Different online software = 25                         | Weight                                                   | Unclear              | N                | N/A                                                        |                                              |
| Cole 2013        | USA       | 3, 12                           | Department of Defense beneficiaries enrolled in the TRICARE health care system living in the San Antonio, Texas, area; Diagnosis of pre - diabetes. | Control - individualised counselling = 31<br>Intervention- shared medical appointment = 34                                                       | Weight; TC; HDL; SBP; HbA1C; FG                          | Unclear              | N                | N/A                                                        |                                              |
| Conroy 2015      | USA       | 3, 12                           | General population                                                                                                                                  | Self-guided = 50<br>Interventionist led = 49                                                                                                     | Weight; SBP                                              | Unclear              | N                | N/A                                                        |                                              |
| Cooper 2010      | UK        | 6, 10, 16, 22, 34, 46           | General population                                                                                                                                  | Guided Self-Help Control = 51<br>Behaviour Therapy = 50<br>Cognitive Behaviour Therapy = 49                                                      | Weight                                                   | Low                  | N                | N/A                                                        |                                              |

| Study ID         | Country:                | Follow-up time points (months): | Population                                                                                                       | Study groups and number of participants randomised                                                                                | Outcome measures extracted*                                                                               | Overall Risk of Bias | Author contacted | Additional information obtained from author <sup>†</sup> : | Notes:                                       |
|------------------|-------------------------|---------------------------------|------------------------------------------------------------------------------------------------------------------|-----------------------------------------------------------------------------------------------------------------------------------|-----------------------------------------------------------------------------------------------------------|----------------------|------------------|------------------------------------------------------------|----------------------------------------------|
| Cousins 1992     | USA                     | 3, 6, 12                        | General population                                                                                               | Control = 56<br>Individual = 56<br>Family = 56                                                                                    | Weight                                                                                                    | Unclear              | N                | N/A                                                        |                                              |
| Craighead 1989   | USA                     | 3, 12                           | General population                                                                                               | Control, minimal contact = 20<br>Contracted Exercise = 20<br>Supervised Exercise = 22                                             | Weight                                                                                                    | Unclear              | N                | N/A                                                        |                                              |
| Crowley 2017     | USA                     | 3.7, 7.4, 11.1                  | Veterans with type 2 diabetes                                                                                    | Group Medical Visit = 136<br>Intensive Weight Management Group Medical Visit = 127                                                | Weight; TC; HDL; SBP; HbA1c                                                                               | High                 | Y                | N                                                          | Information provided.                        |
| Dale 2009        | New Zealand             | 4, 8, 12, 24                    | Insulin resistant adults                                                                                         | Control = 23<br>Modest = 31<br>Intensive intervention = 25                                                                        | Weight                                                                                                    | Unclear              | Y                | N                                                          | Information available from previous reviews. |
| Dalziel 2006     | France                  | 2, 12, 48                       | Patients who had experienced their first myocardial infarction.                                                  | Control = 303<br>Experimental = 302                                                                                               | Weight; TC; HDL; SBP; Final follow-up only: Incidence CV morbidity; Incidence CV mortality                | High                 | N                | N/A                                                        |                                              |
| Damschroder 2014 | USA                     | 3, 12, 18, 24                   | Veterans                                                                                                         | Control, MOVE - usual care = 159<br>ASPIRE group, individual telephone counselling = 162<br>ASPIRE group, group counselling = 160 | Weight; HDL; SBP; HbA1c; QoL                                                                              | Unclear              | N                | N/A                                                        | Information available from previous reviews. |
| Daubenmier 2016  | USA                     | 3, 6, 12, 18                    | Adults with obesity                                                                                              | Active control intervention = 94<br>Mindfulness Intervention = 100                                                                | Weight; TC; HDL; SBP; HbA1c;                                                                              | Low                  | N                | N/A                                                        |                                              |
| Daumit 2013      | USA                     | 6, 12, 18                       | Psychiatric patients                                                                                             | Control, Usual care = 147<br>ACHIEVE = 144                                                                                        | Weight; TC; HDL; SBP; FG; QoL; One timepoint only: Plasma insulin; Incidence CV morbidity; Incidence T2DM | Unclear              | N                | N/A                                                        | Information available from previous reviews. |
| de Zwaan 2017    | Germany and Switzerland | 2, 4, 10, 22                    | Participants had to meet the diagnostic criteria for Binge Eating Disorder or Subsyndromal Binge Eating Disorder | Internet-based guided self-help treatment = 89<br>Cognitive Behavioural Therapy = 89                                              | Weight                                                                                                    | Unclear              | Y                | Y                                                          | Data provided.                               |
| Delahanty 2015   | USA                     | 6, 12                           | Patients with type 2 diabetes                                                                                    | Dietitian Referral group = 29<br>Group lifestyle intervention = 28                                                                | Weight; TC; SBP; HbA1c; One timepoint only: Remission HTN                                                 | High                 | Y                | Y                                                          | Data provided.                               |

| Study ID                             | Country:             | Follow-up time points (months):                                                                                                          | Population                                                                                           | Study groups and number of participants randomised                                            | Outcome measures extracted*                         | Overall Risk of Bias | Author contacted | Additional information obtained from author <sup>†</sup> : | Notes:                                       |
|--------------------------------------|----------------------|------------------------------------------------------------------------------------------------------------------------------------------|------------------------------------------------------------------------------------------------------|-----------------------------------------------------------------------------------------------|-----------------------------------------------------|----------------------|------------------|------------------------------------------------------------|----------------------------------------------|
| deRoos 2017                          | Netherlands          | 4, 12                                                                                                                                    | General population                                                                                   | Control = 48<br>Diet = 97<br>Exercise = 98                                                    | Weight; QoL                                         | High                 | N                | N/A                                                        |                                              |
| deVos 2016                           | Netherlands          | 6, 12, 18, 24, 30, 80                                                                                                                    | Females 50 to 60 years                                                                               | Control = 204<br>Tailor-made lifestyle intervention = 203                                     | Weight; TC; HbA1c; QoL                              | Unclear              | Y                | Y                                                          | Data provided.                               |
| DeZwaan 2005                         | USA                  | 3, 4.1, 6, 7, 12, 18                                                                                                                     | Women with BED                                                                                       | BED = 35<br>BED plus CBT = 36                                                                 | Weight                                              | High                 | N                | N/A                                                        |                                              |
| Diabetes Prevention Program R G 2009 | USA                  | 6, 12, 18, 24, 30, 36, 42, 48, 54, 60, 66, 72, 78, 84, 90, 96, 102, 108, 114, 120, 126, 132, 138, 144, 150, 156, 162, 168, 174, 180, 186 | People at high risk for type 2 diabetes (impaired glucose tolerance)                                 | Placebo = 1082<br>Metformin (N/A) = 1073<br>Lifestyle = 1079                                  | Weight; HDL; SBP; HbA1c; FG; QoL; Incidence T2DM    | High                 |                  |                                                            | Information available from previous reviews. |
| Djuric 2002                          | USA                  | 3, 6, 12                                                                                                                                 | Women with stage I or II breast cancer diagnosed within the past 4 years and free of any recurrence. | Control = 13<br>Weight Watchers = 11<br>Individualized group = 13<br>Comprehensive group = 11 | Weight; TC:HDL ratio; TC; HDL; FG; Plasma insulin   | High                 | Y                | N                                                          | Information available from previous reviews. |
| Donnelly 2013                        | USA                  | 6, 18                                                                                                                                    | General population                                                                                   | Phone Group = 201<br>Face-to-Face Group = 194                                                 | Weight                                              | Low                  | N                | N/A                                                        |                                              |
| Duncan 2016                          | New Zealand          | 4, 12                                                                                                                                    | Primary health care patients with an elevated 5-year cardiovascular disease risk                     | Control = 162<br>Intervention = 158                                                           | Weight; TC:HDL ratio; TC; HDL; SBP.                 | High                 | N                | N/A                                                        |                                              |
| Eakin 2014                           | Australia            | 6, 18, 24                                                                                                                                | Patients 20–75 years with type 2 diabetes                                                            | Usual care = 151<br>Telephone intervention = 151                                              | Weight; TC:HDL ratio; TC; HDL; SBP; HbA1C           | Low                  | Y                | Y                                                          | Data provided                                |
| Eaton 2016                           | United States        | 6, 12, 18, 24                                                                                                                            | General population                                                                                   | Control, Standard Intervention = 106<br>Enhanced Intervention = 105                           | Weight                                              | Low                  | N                | N/A                                                        | Information available from previous reviews. |
| Fahey 2018                           | Texas, United States | 4, 12                                                                                                                                    | Active duty military personnel                                                                       | Self-paced condition = 124<br>Counselor- initiated condition = 124                            | Weight                                              | High                 | N                | N/A                                                        |                                              |
| Fernandez-Ruiz 2018                  | Spain                | 6, 12, 24                                                                                                                                | General population (Community Care Centre population (health centre patients))                       | Control = 37<br>Intervention (healthy eating, exercise & CBT) = 37                            | Weight; TC; SBP; HbA1C; QoL; Incidence CV mortality | Unclear              | N                | N/A                                                        |                                              |
| Finkelstein 2017                     | Singapore            | 4, 8, 12                                                                                                                                 | General population                                                                                   | Control = 54<br>Financial Reward = 107                                                        | Weight                                              | Low                  | N                | N/A                                                        |                                              |
| Fisher 2011                          | USA                  | 6, 12                                                                                                                                    | Community (overweight, premenopausal women)                                                          | Diet only = 29<br>Diet + aerobic training = 43                                                | Weight; FG; Plasma insulin                          | Unclear              | N                | N/A                                                        |                                              |



| Study ID             | Country:    | Follow-up time points (months): | Population                                                                                                                                  | Study groups and number of participants randomised                                                                               | Outcome measures extracted*                                  | Overall Risk of Bias | Author contacted | Additional information obtained from author <sup>#</sup> : | Notes:                                       |
|----------------------|-------------|---------------------------------|---------------------------------------------------------------------------------------------------------------------------------------------|----------------------------------------------------------------------------------------------------------------------------------|--------------------------------------------------------------|----------------------|------------------|------------------------------------------------------------|----------------------------------------------|
|                      |             |                                 |                                                                                                                                             | Diet + resistance training = 54                                                                                                  |                                                              |                      |                  |                                                            |                                              |
| Foley 2016           | USA         | 6, 12                           | Obese (BMI: 30.0-44.9 kg/m <sup>2</sup> ) community health center patients with a diagnosis of hypertension, diabetes and/or hyperlipidemia | Usual care (Control) = 175<br>Weight loss intervention = 176                                                                     | Weight; TC; HDL; SBP; HbA1c; FG; QoL                         | Unclear              | Y                | Y                                                          | Data provided.                               |
| Foreyt 1993          | USA         | 3, 12, 24                       | General population                                                                                                                          | Control (N/A) N = 38<br>Exercise only = 43<br>Diet only = 42<br>Exercise plus diet = 42                                          | Weight                                                       | Unclear              | N                | N/A                                                        |                                              |
| Forman 2013          | USA         | 9, 15                           | General population                                                                                                                          | Standard Behavioural Treatment = 54<br>Acceptance-Based Behavioural Treatment = 74                                               | Weight                                                       | Low                  | Y                | N                                                          |                                              |
| Forman 2016          | USA         | 6, 12, 24, 36                   | General population                                                                                                                          | Standard Behavioural Treatment = 90<br>Acceptance-Based Treatment = 100                                                          | Weight; QoL                                                  | Unclear              | N                | N/A                                                        |                                              |
| Foster-Schubert 2012 | USA         | 6, 12                           | Post-menopausal women                                                                                                                       | Control- usual care = 87<br>Calorie reduced diet = 118<br>Aerobic exercise (N/A) = 117<br>Intervention - diet and exercise = 117 | Weight; HOMA-IR; FG; Plasma insulin; QoL                     | Unclear              | N                | N/A                                                        |                                              |
| Freitas 2017         | Brazil      | 3, 6, 12                        | 30 to 60-year-old patients with moderate/severe asthma                                                                                      | Weight loss program + Sham = 27<br>Weight loss program + Exercise = 28                                                           | Weight                                                       | High                 | Y                | Y                                                          | Data provided.                               |
| Fuller 2012          | Australia   | 1, 2, 3, 6, 9, 12               | Male or female residents of inner western Sydney aged 18–65 years, with a BMI of 25–45 kg/m <sup>2</sup>                                    | Western diet group = 35<br>Korean diet group = 35                                                                                | Weight; TC; HDL; SBP; FG; One timepoint only: Plasma Insulin | Unclear              | Y                | N                                                          |                                              |
| Gold 2007            | USA         | 6, 12                           | General population                                                                                                                          | Commercial programme eDiets = 62<br>Structured VTrim = 62                                                                        | Weight                                                       | Unclear              | N                | N/A                                                        | Information available from previous reviews. |
| Goodwin 2014         | Canada; USA | 6, 12, 18, 24                   | Postmenopausal women diagnosed with T1-3N0-3M0 breast cancer                                                                                | Mailed-based intervention = 167<br>Individual lifestyle intervention = 171                                                       | Weight; QoL                                                  | Unclear              | Y                | N                                                          | Author response received.                    |
| Gorin 2013           | USA         | 6, 18                           | General population                                                                                                                          | Standard Behavioural Weight loss = 99<br>Enhanced home environment behavioural weight loss = 102                                 | Weight                                                       | Unclear              | N                | N/A                                                        | Information available from previous reviews. |
| Green 2015           | USA         | 6, 12, 24                       | People taking antipsychotic medications                                                                                                     | Usual care = 96<br>STRIDE = 104                                                                                                  | Weight; HDL; SBP; FBG; QoL                                   | Unclear              | Y                | N                                                          | Information available from previous reviews. |
| Grilo 2011           | USA         | 5.5, 11.5, 17.5                 | Adults up to 60 years of age who meet full DSM-IV research criteria for BED                                                                 | Cognitive Behavioral Therapy (CBT) = 45<br>Behavioral weight loss (BWL) = 45<br>CBT + BWL (N/A) = 35                             | Weight                                                       | Unclear              | Y                | Y                                                          | Information provided.                        |

| Study ID        | Country:  | Follow-up time points (months): | Population                                                            | Study groups and number of participants randomised                                                                                                                                                                                                     | Outcome measures extracted* | Overall Risk of Bias | Author contacted | Additional information obtained from author <sup>†</sup> : | Notes:                                                             |
|-----------------|-----------|---------------------------------|-----------------------------------------------------------------------|--------------------------------------------------------------------------------------------------------------------------------------------------------------------------------------------------------------------------------------------------------|-----------------------------|----------------------|------------------|------------------------------------------------------------|--------------------------------------------------------------------|
| Grilo 2014      | USA       | 4, 10, 16                       | Patients who were obese and met DSM-5 criteria for BED                | Placebo = 27<br>Placebo/CBTsh = 25<br>Sibutramine (N/A) = 26<br>Sibutramine/CBTsh (N/A) = 26                                                                                                                                                           | Weight                      | Low                  | N                | N/A                                                        |                                                                    |
| Hageman 2017    | USA       | 6, 18, 30                       | General population (women from underserved rural communities)         | Web-based only = 101<br>Web-based discussion = 100<br>Web-based email = 100                                                                                                                                                                            | Weight; TC; HDL; SBP; FG    | Low                  | Y                | Y                                                          | Information provided; Information available from previous reviews. |
| Hakala 1993     | Finland   | 0.5, 3, 8 12, 24, 60            | General population                                                    | Individual community-based counselling = 28<br>Group in-patient rehabilitation = 30                                                                                                                                                                    | Weight                      | Unclear              | N                | N/A                                                        |                                                                    |
| Hanson 1976     | USA       | 2.5, 5, 12                      | General overweight and obese population.                              | No treatment control condition (N/A) = 10<br>Attention-placebo control condition = 11<br>Conventional self-management condition = 7<br>Programmed text with low therapist-group contact = 12<br>Programmed text with high therapist-group contact = 13 | Weight                      | High                 | N                | N/A                                                        |                                                                    |
| Hardcastle 2013 | UK        | 6, 18                           | Primary care patients                                                 | Control = 131<br>MI counselling intervention = 203                                                                                                                                                                                                     | Weight; TC; HDL; SBP        | Unclear              | N                | N/A                                                        |                                                                    |
| Harrigan 2016   | USA       | 6, 12                           | Breast cancer survivors                                               | Usual Care Group = 33<br>Telephone Weight Loss Counseling = 34<br>In-Person Weight Loss Counseling = 33                                                                                                                                                | Weight; FG                  | High                 | Y                | Y                                                          | Data provided.                                                     |
| Harris 2017     | UK        | 6, 12                           | Adults with an intellectual disability                                | Waist Winners Too = 24<br>TAKE 5 = 26                                                                                                                                                                                                                  | Weight; QoL                 | Low                  | N                | N/A                                                        |                                                                    |
| Hunt 2014       | UK        | 3, 12                           | Male football fans                                                    | Control, Wait-list = 373<br>FFIT = 374                                                                                                                                                                                                                 | Weight; SBP; QoL            | High                 | N                | N/A                                                        | Information available from previous reviews.                       |
| Huseinovic 2016 | Sweden    | 3, 12, 24                       | Women 6–15 week postpartum                                            | Control Group = 56<br>Diet behaviour modification Group = 54                                                                                                                                                                                           | Weight; QoL                 | Low                  | N                | N/A                                                        |                                                                    |
| Irwin 2003      | USA       | 3, 12                           | General postmenopausal female population                              | Control Group = 86<br>Exercise group = 87                                                                                                                                                                                                              | Weight; HOMA-IR; FG         | Low                  | N                | N/A                                                        | Information available from previous reviews.                       |
| Jackson 1982    | Australia | 1, 4, 7, 10, 16                 | Females with intellectual disabilities ("mentally retarded females"). | Control = 6<br>Treatment = 6                                                                                                                                                                                                                           | Weight                      | Unclear              | N                | N/A                                                        |                                                                    |
| Jackson 2018    | Italy     | 1, 7, 13, 19                    | Italian women with BED                                                | Brief strategic therapy = 30<br>Cognitive-behavioral therapy = 30                                                                                                                                                                                      | Weight                      | Unclear              | N                | N/A                                                        |                                                                    |

| Study ID     | Country:               | Follow-up time points (months): | Population                                                                                                                                                                                                                                                                                                                                                                 | Study groups and number of participants randomised                                                                                                                                                     | Outcome measures extracted*                                                       | Overall Risk of Bias | Author contacted | Additional information obtained from author <sup>†</sup> : | Notes:                                                      |
|--------------|------------------------|---------------------------------|----------------------------------------------------------------------------------------------------------------------------------------------------------------------------------------------------------------------------------------------------------------------------------------------------------------------------------------------------------------------------|--------------------------------------------------------------------------------------------------------------------------------------------------------------------------------------------------------|-----------------------------------------------------------------------------------|----------------------|------------------|------------------------------------------------------------|-------------------------------------------------------------|
| Jakicic 2011 | USA                    | 6, 12, 18                       | Overweight, sedentary adults                                                                                                                                                                                                                                                                                                                                               | Self Help Group = 89<br>Moderate Physical Activity = 82<br>High Physical Activity = 98                                                                                                                 | Weight                                                                            | Unclear              | N                | N/A                                                        |                                                             |
| Jakicic 2015 | USA                    | 6, 12, 18                       | Adults up to 55 years of age who are overweight or obese.                                                                                                                                                                                                                                                                                                                  | Standard behavior weight loss interventions group = 71<br>ADOPT group = 71<br>MAINTAIN Group (N/A) = 71                                                                                                | Weight                                                                            | Low                  | N                | N/A                                                        |                                                             |
| Jebb 2011    | Australia, Germany, UK | 2, 4, 6, 9, 12, 18, 24          | Adults with a BMI 27-35 and at least one additional risk factor for obesity-related disease                                                                                                                                                                                                                                                                                | Standard care = 395<br>Commercial programme = 377                                                                                                                                                      | Weight; TC:HDL ratio; TC; SBP; FG; Incidence T2DM; Remission T2DM                 | Low                  | Y                | Y                                                          | Data provided; Information available from previous reviews. |
| Jebb 2017    | UK                     | 3, 6, 12, 36                    | Obese adults seeking support to lose weight                                                                                                                                                                                                                                                                                                                                | Usual care = 140<br>Low energy total diet replacement programme = 138                                                                                                                                  | Weight; TC; HDL; SBP; HbA1c; FG; Plasma insulin; QoL; One timepoint only: HOMA-IR | Low                  | N                | N/A                                                        |                                                             |
| Jeffery 1995 | USA                    | 6, 12, 18, 30                   | Adults 25-45 years with overweight or obesity.                                                                                                                                                                                                                                                                                                                             | Control group = 40<br>Standard Behavioural Therapy (SBT) = 40<br>SBT + Incentives (I) = 41<br>SBT + Food Provision (FP) = 40<br>SBT + FP + I = 41                                                      | Weight                                                                            | Unclear              | N                | N/A                                                        | Information available from previous reviews.                |
| Jeffery 2003 | USA                    | 6, 12, 18 30                    | Overweight population                                                                                                                                                                                                                                                                                                                                                      | Standard behaviour therapy = 93<br>High physical activity = 109                                                                                                                                        | Weight                                                                            | Unclear              | Y                | Y                                                          | Information provided.                                       |
| Jenkins 2017 | Canada                 | 6, 18                           | General population in the city of Toronto                                                                                                                                                                                                                                                                                                                                  | Control = 486<br>Dietary advice only = 145<br>Food basket only = 148<br>Food and advice = 140                                                                                                          | Weight; TC:HDL ratio; SBP; FG                                                     | High                 | N                | N/A                                                        |                                                             |
| John 2011    | USA                    | 7.4, 17                         | Adults 30 to 70 years of age with obesity                                                                                                                                                                                                                                                                                                                                  | Control = 22<br>Deposit contracts group = 44                                                                                                                                                           | Weight                                                                            | High                 | Y                | N                                                          |                                                             |
| Jolly 2011   | UK                     | 3, 12                           | Obese or overweight men and women with a comorbid disorder identified from general practice records, with a raised BMI recorded within their primary care notes within the previous 15 months. The BMI threshold for invitation is that which makes them eligible for primary care obesity management services within the NHS and varies according to ethnic group and the | Minimal intervention comparator = 100<br>Choice (N/A) = 100<br>Pharmacy = 70<br>General practice = 70<br>Weight Watchers = 100<br>NHS Size Down = 100<br>Rosemary Conley = 100<br>Slimming world = 100 | Weight                                                                            | High                 | N                | N/A                                                        | Information available from previous reviews.                |

| Study ID      | Country:    | Follow-up time points (months): | Population                                                          | Study groups and number of participants randomised                                                                                                                                         | Outcome measures extracted*               | Overall Risk of Bias | Author contacted | Additional information obtained from author <sup>#</sup> : | Notes:                                                             |
|---------------|-------------|---------------------------------|---------------------------------------------------------------------|--------------------------------------------------------------------------------------------------------------------------------------------------------------------------------------------|-------------------------------------------|----------------------|------------------|------------------------------------------------------------|--------------------------------------------------------------------|
|               |             |                                 | presence or absence of comorbidities.                               |                                                                                                                                                                                            |                                           |                      |                  |                                                            |                                                                    |
| Jones 1986    | UK          | 4, 16                           | Female adults                                                       | Individual = 21<br>Group = 17<br>Leaflet Individual = 22<br>Leaflet Group = 20<br>Diary Individual = 20<br>Diary Group = 19<br>Leaflet Diary Individual = 21<br>Leaflet Diary Group = 20   | Weight                                    | High                 | N                | N/A                                                        |                                                                    |
| Jones 1999    | USA         | 3, 6, 12, 18, 24, 30            | Patients with hypertension above the age of 50                      | Control Group = NS<br>Weight Loss Group = NS                                                                                                                                               | Weight                                    | Unclear              | Y                | Y                                                          | Information provided.                                              |
| Katula 2013   | USA         | 6, 12, 18, 24                   | People with pre-diabetes (fasting blood glucose=95 mg/dl ≤FBG ≤125) | Enhanced Usual Care Comparison Condition = 150<br>Lifestyle Weight-Loss Intervention = 151                                                                                                 | Weight; HDL; SBP; HOMA-IR; Incidence T2DM | Low                  | Y                | N                                                          |                                                                    |
| Katzer 2008   | New Zealand | 2.3, 6.3, 14.3, 26.3            | Women with at least one other cardiovascular risk factor.           | Mail-delivered 'non-dieting' program (P3) = 101<br>Group 'non-dieting' program (P2) = 62<br>Group 'non-dieting' program plus Relaxation (P1) = 62                                          | Weight; SBP                               | Unclear              | N                | N/A                                                        |                                                                    |
| Keogh 2014    | Australia   | 2, 12                           | General population                                                  | Intermittent dieting = 39<br>Continuous dieting = 36                                                                                                                                       | Weight                                    | High                 | N                | N/A                                                        |                                                                    |
| Keränen 2009  | Finland     | 1,3, 4.6, 5, 6, 12, 18          | General population                                                  | Short-term counselling = 47<br>Intensive counselling = 35                                                                                                                                  | Weight                                    | Low                  | N                | N/A                                                        | Information available from previous reviews.                       |
| King 1989     | USA         | 7, 12, 24                       | Men aged 30 - 59 years.                                             | Control (N/A) = 52<br>Exercise only = 52<br>Diet only = 51                                                                                                                                 | Weight; TC/HDL ratio; TC                  | High                 | N                | N/A                                                        |                                                                    |
| Kingsley 1977 | USA         | 2, 5, 8, 11, 14                 | General population                                                  | Social Pressure = 11<br>Group Behavioural = 13<br>Individual Behavioural = 12<br>Social Pressure – Booster = 11<br>Group Behavioural – Booster = 13<br>Individual Behaviour – Booster = 12 | Weight                                    | High                 | N                | N/A                                                        |                                                                    |
| Knauper 2018  | Canada      | 3, 12, 24                       | Individuals with overweight or obesity                              | Standard DPP = 101<br>Enhanced DPP = 107                                                                                                                                                   | Weight; TC/HDL ratio; SBP; HbA1c          | High                 | Y                | Y                                                          | Data provided.                                                     |
| Kuller 2012   | USA         | 6, 18, 30, 48                   | Postmenopausal females                                              | Control - health education = 255<br>Intervention - lifestyle change = 253                                                                                                                  | Weight; HDL; SBP; FG                      | Low                  | Y                | Y                                                          | Information provided. Information available from previous reviews. |

| Study ID       | Country:        | Follow-up time points (months):              | Population                                                                                                                                                        | Study groups and number of participants randomised                                                                                                               | Outcome measures extracted*                                                                                               | Overall Risk of Bias | Author contacted | Additional information obtained from author <sup>†</sup> : | Notes:                                       |
|----------------|-----------------|----------------------------------------------|-------------------------------------------------------------------------------------------------------------------------------------------------------------------|------------------------------------------------------------------------------------------------------------------------------------------------------------------|---------------------------------------------------------------------------------------------------------------------------|----------------------|------------------|------------------------------------------------------------|----------------------------------------------|
| Kumanyika 2012 | USA             | 12, 24                                       | General population (65% African American, non-Hispanic black)                                                                                                     | Basic programme = 137<br>Basic plus programme = 124                                                                                                              | Weight; SBP                                                                                                               | Low                  | N                | N/A                                                        | Information available from previous reviews. |
| Leahey 2014    | USA             | 3, 6, 12                                     | General population                                                                                                                                                | SURI alone = 46<br>SURI plus Internet behavioral weight loss program = 90<br>SURI plus Internet behavioral weight loss program plus optional group sessions = 94 | Weight                                                                                                                    | Unclear              | N                | N/A                                                        |                                              |
| Leahey 2015    | USA             | 3, 12                                        | Adults                                                                                                                                                            | SURII Internet behavioral weight loss = 91<br>SURII Internet behavioral weight loss incentives = 89<br>SURII Internet behavioral weight loss 1 group option = 88 | Weight                                                                                                                    | Unclear              | N                | N/A                                                        |                                              |
| Lejeune 2003   | The Netherlands | 3, 12.2                                      | Men with obesity                                                                                                                                                  | Diet = 20<br>Diet plus exercise = 20                                                                                                                             | Weight                                                                                                                    | Unclear              | Y                | N                                                          | Information available from previous reviews. |
| Ley 2004       | New Zealand     | 6, 12, 24, 36, 60                            | Workers with impaired glucose tolerance ((2 h blood glucose 7.8–11.0 mmol/l) and a further 114 (2%) had high normal blood glucose concentrations (7.0–7.8 mol/l)) | Control diet = 70<br>Reduced-fat = 66                                                                                                                            | Weight; TC/HDL ratio; TC; HDL; SBP                                                                                        | High                 | N                | N/A                                                        |                                              |
| Li 2016        | China           | 1, 12                                        | Adults with Type 2 Diabetes Mellitus who are overweight (BMI ≥ 24 kg/m <sup>2</sup> )                                                                             | Usual care group = 60<br>Diet group = 79<br>50g-oats group = 80<br>100g-oats group = 79                                                                          | Weight; TC; HbA1c                                                                                                         | Unclear              | Y                | N                                                          |                                              |
| Li 2005        | USA             | 0.5, 1.5, 2, 3, 4, 5, 6, 7, 8, 9, 10, 11, 12 | Adults previously diagnosed and being treated for type II Diabetes Mellitus who are obese                                                                         | Individualized diet plan = 52<br>Soy-based meal replacement = 52                                                                                                 | Weight; TC; HbA1c                                                                                                         | High                 | Y                | N                                                          |                                              |
| Lindstrom 2003 | Finland         | 12, 24, 36, 48, 60, 72, 86, 96, 108, 120     | Impaired glucose tolerance (IGT); People at high risk for type 2 diabetes                                                                                         | Control = 257<br>Intervention = 265                                                                                                                              | Weight; TC/HDL ratio; TC; HDL; SBP; HbA1c; FBG; Incidence DM; Incidence CVD morbidity; One timepoint only; Plasma insulin | High                 | Y                | N                                                          | Information available from previous reviews. |
| Liss 2016      | USA             | 6, 12                                        | Adults with type 2 diabetes and a BMI ≥ 24 kg/m <sup>2</sup>                                                                                                      | Standard care arm = 167<br>Standard care plus group-based lifestyle intervention = 164                                                                           | Weight; TC; SBP; HbA1c                                                                                                    | Low                  | Y                | Y                                                          | Data provided.                               |

| Study ID      | Country: | Follow-up time points (months): | Population                                                                                                                                              | Study groups and number of participants randomised                                                                                                 | Outcome measures extracted*          | Overall Risk of Bias | Author contacted | Additional information obtained from author <sup>†</sup> : | Notes:                                                      |
|---------------|----------|---------------------------------|---------------------------------------------------------------------------------------------------------------------------------------------------------|----------------------------------------------------------------------------------------------------------------------------------------------------|--------------------------------------|----------------------|------------------|------------------------------------------------------------|-------------------------------------------------------------|
| Little 2016   | UK       | 6, 12                           | General population                                                                                                                                      | Control, Nurse follow-up = 279<br>Web-based support with minimal support (Remote) = 270<br>Web-based + nurse support (face to face) = 269          | Weight; TC; HDL; SBP; HbA1c; FG; QoL | Unclear              | N                | N/A                                                        | Information available from previous reviews.                |
| Long 1983     | UK       | 4, 16                           | Overweight females 18-60 years of age                                                                                                                   | Individual Dietetic Counselling Group = 12<br>Group Dietetic Counselling Group = 12<br>Group Dietetic Counselling and behaviour therapy Group = 12 | Weight                               | Unclear              | N                | N/A                                                        |                                                             |
| Lowe 2018     | USA      | 6, 12, 18, 24                   | Community                                                                                                                                               | Behavior therapy = 90<br>Behavior therapy plus meal replacements = 91<br>Home food environment = 81                                                | Weight                               | Unclear              | N                | N/A                                                        | Information available from previous reviews.                |
| Ma 2015       | USA      | 6, 12                           | Obese adults with uncontrolled asthma                                                                                                                   | Control, Enhanced usual care = 165<br>Diet and counselling = 165                                                                                   | Weight                               | Low                  | N                | N/A                                                        | Information available from previous reviews.                |
| Manning 1994  | UK       | 3, 6, 12, 48                    | Diabetic males and females                                                                                                                              | Clinic visit = 37<br>Behavioural = 38<br>Home visits = 35<br>Dexfenfluramine (N/A) = NS<br>Routine usual care (N/A) = NS                           | Weight; HbA1c                        | Unclear              | N                | N/A                                                        |                                                             |
| Manzoni 2016  | Italy    | 1.4, 12,                        | Obese patients admitted to the obesity unit of the Istituto Auxologico Italiano, Verbania, Italy for the treatment of obesity and related comorbidities | Control, Standard behavioral inpatient program = 52<br>Cognitive-behavioral therapy = 54<br>CBT + Virtual reality = 57                             | Weight                               | High                 | N                | N/A                                                        | Information available from previous reviews.                |
| Marniemi 1990 | Finland  | 2.5, 6, 12                      | General obese and overweight population                                                                                                                 | Control group = 42<br>Lactovegetarian weight reduction group = 31<br>Mixed diet weight reduction = 37                                              | Weight                               | Unclear              | N                | N/A                                                        |                                                             |
| Martin 2008   | USA      | 6, 9, 12, 18                    | African American women                                                                                                                                  | Control, Standard Care = 69<br>Tailored physician/lifestyle counselling = 68                                                                       | Weight                               | High                 | N                | N/A                                                        | Information available from previous reviews.                |
| Mefferd 2007  |          | 4, 12                           | Adult breast cancer survivors with a BMI $\geq$ 25.0 kg/m <sup>2</sup>                                                                                  | Control = 29<br>Intervention = 56                                                                                                                  | Weight; TC                           | Unclear              | Y                | Y                                                          | Data provided; Information available from previous reviews. |
| Melchart 2017 | Germany  | 3, 6, 9, 12                     | Adults aged 18-67 years who are moderately overweight                                                                                                   | Control group = 57<br>Intervention group = 109                                                                                                     | Weight; TC/HDL ratio; SBP; FG        | Low                  | Y                | Y                                                          | Data provided.                                              |

| Study ID        | Country:    | Follow-up time points (months):                               | Population                                                                                                                                  | Study groups and number of participants randomised                                                                                     | Outcome measures extracted*                       | Overall Risk of Bias | Author contacted | Additional information obtained from author <sup>†</sup> : | Notes:                                       |
|-----------------|-------------|---------------------------------------------------------------|---------------------------------------------------------------------------------------------------------------------------------------------|----------------------------------------------------------------------------------------------------------------------------------------|---------------------------------------------------|----------------------|------------------|------------------------------------------------------------|----------------------------------------------|
| Melin 2003      | Sweden      | 3, 6, 12, 24                                                  | Obesity with complication diagnoses (i.e. diabetes type 2, hypertension, dyslipoproteinemia, polycystic ovary disease and apnoea disorder). | Control, less intensively treated = 21<br>Intensively treated = 22                                                                     | Weight; SBP; FG;<br>Plasma insulin                | Unclear              | N                | N/A                                                        | Information available from previous reviews. |
| Menard 2005     | Canada      | 6, 12, 18                                                     | Patients with type 2 diabetes                                                                                                               | Control - usual care = 36<br>Intervention - intensive multitherapy = 36                                                                | Weight; TC/HDL ratio; SBP; HbA1c; QoL             | Unclear              | Y                | N                                                          | Information available from previous reviews. |
| Mengham 1999    | UK          | 6, 12                                                         | Patients with diabetes, aged less than 75 years, with BMI above 25kg/m <sup>2</sup>                                                         | Control = NS<br>Intervention = NS                                                                                                      | Weight; TC                                        | Unclear              | N                | N/A                                                        | Information available from previous reviews. |
| Mensingher 2016 | USA         | 6, 24                                                         | General population                                                                                                                          | Control, Weight Neutral Program = 40<br>Weight Loss Program = 40                                                                       | Weight; TC/HDL ratio; TC; HDL; SBP; FG; QoL       | High                 | N                | N/A                                                        | Information available from previous reviews. |
| Messier 2013    | USA         | 1, 2, 3, 4, 5, 6, 7, 8, 9, 10, 11, 12, 13, 14, 15, 16, 17, 18 | Ambulatory, community-dwelling persons age 55 years or older with mild or moderate knee osteoarthritis                                      | Exercise only = 150<br>Diet-induced weight loss only = 152<br>Diet-induced weight loss plus exercise = 152                             | Weight; QoL                                       | Unclear              | Y                | Y                                                          | Data provided.                               |
| Miller 2002     | USA         | 2, 12                                                         | NS                                                                                                                                          | Control Group (Monitoring) = 23<br>Lifestyle Intervention = 22                                                                         | Weight; SBP                                       | Low                  | Y                | N                                                          | Information available from previous reviews. |
| Mitsui 2008     | Japan       | 3, 12                                                         | 50-69-year-old adults                                                                                                                       | Control = 22<br>Intervention = 24                                                                                                      | Weight; TC; HDL; SBP; FG                          | Unclear              | Y                | N                                                          |                                              |
| Molenaar 2010   | Netherlands | 6, 12                                                         | General overweight or obese population                                                                                                      | Nutritional counselling group (diet D, group) = 67<br>Nutritional plus exercise counselling group (diet + exercise (D + E) group) = 67 | Weight                                            | Unclear              | N                | N/A                                                        |                                              |
| Moreno 2014     | Spain       | 0.5, 2, 4, 6, 8, 10, 12, 18, 24                               | Patients with obesity and prediabetes attending a hospital obesity unit (Obesity Unit, Hospital Gregorio Maranon, Madrid)                   | Low-calorie diet = 39<br>Very low-calorie-ketogenic diet = 40                                                                          | Weight; TC; HDL; HbA1c; FG                        | Unclear              | Y                | N                                                          | Information available from previous reviews. |
| Morgan 2010     | Australia   | 3, 6, 12                                                      | Males 18-60 years of age who are overweight or obese.                                                                                       | Control (Information and self-help) = 31<br>SHED-IT (Internet) group = 34                                                              | Weight; SBP                                       | Low                  | N                | N/A                                                        | Information available from previous reviews. |
| Muggia 2014     | Italy       | 6, 12                                                         | Overweight and obese patients                                                                                                               | Standard care group = 83<br>Brief CBT group = 80                                                                                       | Weight; TC; HDL; SBP; HOMA-IR; FG; Plasma insulin | High                 | N                | N/A                                                        |                                              |
| Munsch 2003     | Switzerland | 4, 16                                                         | Adults with obesity                                                                                                                         | GP control = 17<br>Clinic BASEL = 52<br>GP BASEL = 53                                                                                  | Weight                                            | High                 | N                | N/A                                                        | Information available from previous reviews. |

| Study ID       | Country:    | Follow-up time points (months):              | Population                                                                                                           | Study groups and number of participants randomised                                                                                   | Outcome measures extracted*                            | Overall Risk of Bias | Author contacted | Additional information obtained from author <sup>†</sup> : | Notes:                                                      |
|----------------|-------------|----------------------------------------------|----------------------------------------------------------------------------------------------------------------------|--------------------------------------------------------------------------------------------------------------------------------------|--------------------------------------------------------|----------------------|------------------|------------------------------------------------------------|-------------------------------------------------------------|
| Munsch 2007    | Switzerland | 2, 4, 7, 10, 16, 76                          | Adults with BED                                                                                                      | Group BWLT = 36<br>Group CBT = 44                                                                                                    | Weight                                                 | Unclear              | Y                | Y                                                          | Data provided.                                              |
| Murphy 1982    | USA         | 2.5, 3, 5.5, 8.5, 14.5, 26.5,                | General population (married couples)                                                                                 | Waiting list (N/A) = NS<br>Supportive = 11<br>Alone-1 Party = 13<br>Alone-2 Party = 13<br>Couple-1 Party = 13<br>Couple-2 Party = 12 | Weight                                                 | Unclear              | N                | N/A                                                        |                                                             |
| Nakata 2014    | Japan       | 3, 6, 18, 30                                 | Japanese adults                                                                                                      | Control (N/A) = 63<br>Education-only = 62<br>Group-based support = 63                                                                | Weight; HDL; SBP; FG                                   | Unclear              | Y                | Y                                                          | Data provided.                                              |
| Nanchahal 2012 | UK          | 6, 12                                        | Adults with BMI $\geq$ 25 kg/m <sup>2</sup>                                                                          | Usual care control = 190<br>CAMWEL Intervention = 191                                                                                | Weight; SBP; QoL                                       | Unclear              | Y                | Y                                                          | Data provided; Information available from previous reviews. |
| Ng 2015        | UK          | 4, 12                                        | Chinese patients with moderate to severe obstructive sleep apnoea (OSA) diagnosed on portable home sleep monitoring. | Control group = 43<br>Lifestyle modification program = 61                                                                            | Weight; TC; FG; QoL                                    | Unclear              | Y                | Y                                                          | Data provided.                                              |
| Nicklas 2004   | USA         | 6, 18                                        | Community-dwelling sedentary adults 60 years of age or above with symptomatic knee osteoarthritis.                   | Healthy lifestyle control = 78<br>Exercise only = 80<br>Diet only = 82<br>Diet plus exercise = 76                                    | Weight                                                 | Unclear              | N                | N/A                                                        |                                                             |
| Nicklas 2009   | USA         | 4.6, 10.6, 16.6                              | Postmenopausal women with abdominal obesity                                                                          | Calorie restriction (CR) Only = 34<br>CR + Moderate-Intensity = 40<br>CR + Vigorous-Intensity = 38                                   | Weight; HDL; Glucose tolerance                         | Unclear              | Y                | Y                                                          | Data provided.                                              |
| Nilsen 2011    | Norway      | 6, 12, 18                                    | Individuals at high risk for type 2 Diabetes                                                                         | Control, Individual Physician Group = 104<br>Individual Plus Interdisciplinary Group = 109                                           | Weight; TC; HDL; SBP; HbA1c; FG                        | Low                  | Y                | Y                                                          | Data provided; Information available from previous reviews. |
| Nordby 2012    | Denmark     | 3, 9, 15                                     | Younger (age: 20–40 years), sedentary, and only moderately overweight (BMI: 25–30 kg/m <sup>2</sup> ) men.           | Control = 15<br>Training and increased diet (N/A) = 13<br>Training = 17<br>Energy-reduced diet = 15                                  | Weight; TC; SBP; HbA1c                                 | High                 | Y                | Y                                                          | Data provided.                                              |
| Nurkkala 2015  | Finland     | 0, 9, 24, 36                                 | General population between 18–65 years                                                                               | Control = 30<br>Intervention group = 90                                                                                              | Weight                                                 | Unclear              | N                | N/A                                                        |                                                             |
| Oldroyd 2006   | UK          | 6, 12, 24                                    | Men and women of European origin                                                                                     | Control group = 39<br>Intervention group = 39                                                                                        | Weight; TC; FG                                         | Unclear              | N                | N/A                                                        | Information available from previous reviews.                |
| Pan 1997       | China       | 24, 48, 72, 96, 120, 144, 168, 192, 216, 240 | Chinese participants with impaired glucose tolerance                                                                 | Control = 138<br>Intervention group (Exercise: n=155;                                                                                | Weight; TC; SBP; FG; Incidence CV morbidity; Incidence | High                 | Y                | N                                                          |                                                             |



| Study ID        | Country:   | Follow-up time points (months): | Population                                                                                                     | Study groups and number of participants randomised                                                                                                                                                                                                                                                                                                                               | Outcome measures extracted*                             | Overall Risk of Bias | Author contacted | Additional information obtained from author <sup>†</sup> : | Notes:                                       |
|-----------------|------------|---------------------------------|----------------------------------------------------------------------------------------------------------------|----------------------------------------------------------------------------------------------------------------------------------------------------------------------------------------------------------------------------------------------------------------------------------------------------------------------------------------------------------------------------------|---------------------------------------------------------|----------------------|------------------|------------------------------------------------------------|----------------------------------------------|
|                 |            | 252, 264, 276, 288, 360         |                                                                                                                | Diet: n = 148; Diet plus exercise: n = 135) = 438                                                                                                                                                                                                                                                                                                                                | CV mortality; Incidence T2DM; One timepoint only: HbA1c |                      |                  |                                                            |                                              |
| Parikh 2010     | USA        | 3, 6, 12                        | Adults with BMI $\geq 25$ kg/m <sup>2</sup> and prediabetes                                                    | Control = 49<br>Intervention = 50                                                                                                                                                                                                                                                                                                                                                | Weight; SBP; HbA1c                                      | Unclear              | Y                | N                                                          |                                              |
| Patel 2016      | USA        | 6, 12                           | Adults 18 to 70 years                                                                                          | Control group = 50<br>Standard premium discount = 51<br>Immediate premium discount = 50<br>Daily lottery incentive = 50                                                                                                                                                                                                                                                          | Weight                                                  | Unclear              | N                | N/A                                                        |                                              |
| Pavlou 1989a    | USA        | 3, 8, 18, 36                    | General male population                                                                                        | Balanced caloric-deficit diet plus supervised exercise = 5<br>Balanced caloric-deficit diet - No exercise = 6<br>Protein-sparing modified fast plus supervised exercise = 5<br>Protein-sparing modified fast - no exercise = 5                                                                                                                                                   | Weight                                                  | Unclear              | N                | N/A                                                        | Information available from previous reviews. |
| Pavlou 1989b    | USA        | 1, 2, 8, 18                     | General male population                                                                                        | Balanced caloric-deficit diet - No exercise = 11<br>Balanced caloric-deficit diet plus supervised exercise = 10<br>Protein-sparing modified fast - no exercise = 16<br>Protein-sparing modified fast plus supervised exercise = 16<br>DPC-70 - no exercise = 13<br>DPC-70 - plus supervised exercise = 10<br>DPC 800 - no exercise = 16<br>DPC 800 plus supervised exercise = 18 | Weight                                                  | Unclear              | N                | N/A                                                        | Information available from previous reviews. |
| Pearce 1981     | Canada     | 2.3, 5.3, 8.3, 14.3             | Women, 20-60 years of age who were at least 20 lbs. (9.09 kg) and 20% overweight                               | Alternative treatment = 14<br>Wives alone = 13                                                                                                                                                                                                                                                                                                                                   | Weight                                                  | Unclear              | N                | N/A                                                        |                                              |
| Pedersen 2013   | Copenhagen | 3, 12                           | Adults with stable coronary artery disease who are overweight or obese                                         | Aerobic interval training = 35<br>Low energy diet = 35                                                                                                                                                                                                                                                                                                                           | Weight; TC/HDL ratio; SBP; HbA1c                        | Unclear              | N                | N/A                                                        |                                              |
| Pekkarinen 2015 | Finland    | 4, 16, 30                       | Obese referred patients at an outpatient obesity clinic, Peijas Hospital, Helsinki University Central Hospital | Control, Follow up without intervention = 99<br>One-year maintenance program = 100                                                                                                                                                                                                                                                                                               | Weight; QoL                                             | Low                  | N                | N/A                                                        | Information available from previous reviews. |
| Perri 1984      | USA        | 3, 6.5, 9.5, 15.5               | General population                                                                                             | Non-behavioural therapy = 15<br>Non-behavior therapy plus post-treatment contact = 16                                                                                                                                                                                                                                                                                            | Weight                                                  | Unclear              | N                | N/A                                                        |                                              |

| Study ID     | Country:    | Follow-up time points (months): | Population                                                                                                                              | Study groups and number of participants randomised                                                                                                                                                                         | Outcome measures extracted*                      | Overall Risk of Bias | Author contacted | Additional information obtained from author <sup>†</sup> : | Notes:                                       |
|--------------|-------------|---------------------------------|-----------------------------------------------------------------------------------------------------------------------------------------|----------------------------------------------------------------------------------------------------------------------------------------------------------------------------------------------------------------------------|--------------------------------------------------|----------------------|------------------|------------------------------------------------------------|----------------------------------------------|
|              |             |                                 |                                                                                                                                         | Behavior therapy = 21<br>Behavior therapy plus relapse prevention training = 15<br>Behavior therapy plus post-treatment contact = 15<br>Behavior therapy plus relapse prevention training plus post-treatment contact = 17 |                                                  |                      |                  |                                                            |                                              |
| Perri 1986   | USA         | 4.6, 7.6, 10.6, 14.6, 22.6      | Adults 22 to 60 years of age who were between 20%-100% over ideal body weight based on Metropolitan Life Insurance Company norms (1959) | Behavior therapy = NS<br>Behavior therapy plus maintenance = NS<br>Behavior therapy plus aerobic exercise = NS<br>Behavior therapy behavior therapy plus aerobic exercise plus maintenance = NS                            | Weight                                           | Unclear              | N                | N/A                                                        |                                              |
| Perri 1987   | USA         | 4.6, 7, 18                      | Adults 21-60 years of age and 20%-100% overweight                                                                                       | Behavior therapy only = 22<br>Behavior therapy plus a peer self-help group maintenance program = 46<br>Behavior therapy plus a therapist-contact maintenance program = 41                                                  | Weight                                           | Unclear              | N                | N/A                                                        |                                              |
| Perri 1989   | USA         | 5, 10, 16                       | General population                                                                                                                      | Standard treatment group = 24<br>Extended treatment regimen = 24                                                                                                                                                           | Weight                                           | Unclear              | N                | N/A                                                        |                                              |
| Perri 1997   | USA         | 6, 12, 15                       | Women 40-60 years of age                                                                                                                | WL + Home-based exercise = 24<br>WL + Group-based exercise = 25                                                                                                                                                            | Weight                                           | Unclear              | N                | N/A                                                        |                                              |
| Perri 2001   | USA         | 5, 11, 17                       | General population.                                                                                                                     | Control, Standard Behavioural Therapy (BT) = NS<br>BT + Relapse prevention training = NS<br>BT + problem-solving therapy = NS                                                                                              | Weight                                           | Unclear              | N                | N/A                                                        | Information available from previous reviews. |
| Perri 2014   | USA         | 6, 24                           | General population                                                                                                                      | Control, Education group = 169<br>Low dose, (low intensity lifestyle counselling) = 148<br>Moderate dose, (Moderate intensity lifestyle counselling) = 134<br>High dose, (High intensity lifestyle counselling) = 161      | Weight                                           | Unclear              | N                | N/A                                                        | Information available from previous reviews. |
| Pettman 2009 | Australia   | 4, 12                           | Adults with metabolic syndrome                                                                                                          | Control = 50<br>Intervention B - Passive follow-up = 54<br>Intervention A - Active follow-up = 49                                                                                                                          | Weight; TC; SBP; HOMA-IR; One timepoint only: FG | Low                  | Y                | Y                                                          | Data provided.                               |
| Poelman 2015 | Netherlands | 3, 6, 12                        | General population                                                                                                                      | Control Condition = 139<br>Intervention condition = 139                                                                                                                                                                    | Weight                                           | High                 | Y                | Y                                                          | Data provided.                               |

| Study ID        | Country:   | Follow-up time points (months):                                 | Population                                                                                                                                                                                         | Study groups and number of participants randomised                                                                  | Outcome measures extracted*                | Overall Risk of Bias | Author contacted | Additional information obtained from author <sup>†</sup> : | Notes:                                                      |
|-----------------|------------|-----------------------------------------------------------------|----------------------------------------------------------------------------------------------------------------------------------------------------------------------------------------------------|---------------------------------------------------------------------------------------------------------------------|--------------------------------------------|----------------------|------------------|------------------------------------------------------------|-------------------------------------------------------------|
| Promrat 2010    | USA        | 3, 6, 9, 12                                                     | Adults who were overweight or obese and diagnosed with Nonalcoholic steatohepatitis                                                                                                                | Control = 10<br>Lifestyle Intervention = 21                                                                         | Weight; TC; HbA1c; HOMA-IR                 | Low                  | Y                | Y                                                          | Data provided.                                              |
| Provencher 2009 | Canada     | 4, 10, 16                                                       | Premenopausal women                                                                                                                                                                                | Control group = 48<br>Social support = 48<br>Health-At-Every-Size = 48                                              | Weight; TC; One timepoint only: HDL;       | Unclear              | Y                | Y                                                          | Data provided.                                              |
| Ptomey 2018     | USA        | 6, 18                                                           | Adults with mild-to-moderate intellectual and developmental disabilities                                                                                                                           | Conventional Diet = 72<br>Enhanced Stop Light Diet = 78                                                             | Weight                                     | Low                  | N                | N/A                                                        |                                                             |
| Ramirez 2001    | USA        | 4, 7, 16                                                        | General adult overweight and obese population                                                                                                                                                      | Weight control only = 40<br>Weight control plus body image therapy = 48                                             | Weight                                     | Unclear              | N                | N/A                                                        |                                                             |
| Rejeski 2011    | USA        | 6, 18                                                           | Patients with CVD or cardiometabolic dysfunction                                                                                                                                                   | Successful aging control arm, = 93<br>Physical activity = 97<br>Weight loss and physical activity = 98              | Weight                                     | Unclear              | N                | N/A                                                        | Information available from previous reviews.                |
| Ridgeway 1999   | USA        | 6, 12                                                           | Patients with Type 2 Diabetes                                                                                                                                                                      | Control = 28<br>Intervention Group = 28                                                                             | Weight; TC; HbA1c; FBG                     | Unclear              | N                | N/A                                                        |                                                             |
| Rock 2015       | USA        | 6, 12, 18, 24                                                   | Patients with early-stage breast cancer                                                                                                                                                            | Control = 349<br>Intervention = 348                                                                                 | Weight; SBP                                | Low                  | N                | N/A                                                        |                                                             |
| Rolls 2005      | USA        | 0.92, 1.8, 2.8, 3.7, 4.6, 5.5, 6.4, 7.4, 8.3, 9.2, 10.1, 11, 12 | Overweight and obese women and men                                                                                                                                                                 | Comparison-control = 50<br>Two snacks = 50<br>One soup = 50<br>Two soups = 50                                       | Weight; TC; SBP                            | Unclear              | Y                | Y                                                          | Data provided.                                              |
| Rolls 2017      | USA        | 1, 2, 3, 4, 5, 6, 7, 8, 9, 10, 11, 12                           | Women aged 20–65 years BMI of 28–45 kg/m <sup>2</sup>                                                                                                                                              | Standard advice = 62<br>Pre-portioned foods group = 62<br>Portion selection group = 62                              | Weight; TC; SBP; HOMA-IR; FG               | Unclear              | Y                | Y                                                          | Data provided; Information available from previous reviews. |
| Rosas 2015      | California | 6, 12, 24                                                       | Participants are obese Spanish-speaking adults with at least one cardiovascular risk factor recruited from a community health center in a low-income neighborhood of San Mateo County, California. | Usual care = 41<br>Case-management intervention = 84<br>Case-management + Community health worker intervention = 82 | Weight; TC; HDL; SBP; HbA1c; FG            | Unclear              | N                | N/A                                                        |                                                             |
| Ross 2012       | Canada     | 6, 12, 18, 24                                                   | General population                                                                                                                                                                                 | Control condition = 241<br>Behavioral intervention group = 249                                                      | Weight; TC; HDL; SBP; FG                   | Unclear              | N                | N/A                                                        | Information available from previous reviews.                |
| Samaras 1997    | Australia  | 6, 12                                                           | Mature-aged people, performing less than 1 hour of exercise per week                                                                                                                               | Control = 13<br>Intervention = 13                                                                                   | Weight; TC; HDL; HbA1c; FG; Plasma insulin | Unclear              | N                | N/A                                                        | Information available from previous reviews.                |
| Santanasto 2011 | USA        | 6, 12                                                           | Community dwelling older men and woman age 60 and over, who were overweight to                                                                                                                     | Physical Activity plus Successful Ageing = 15<br>Physical Activity plus Weight Loss = 21                            | Weight                                     | Unclear              | N                | N/A                                                        |                                                             |

| Study ID      | Country:        | Follow-up time points (months): | Population                                                                                                                  | Study groups and number of participants randomised                                                                                                                                                                           | Outcome measures extracted*   | Overall Risk of Bias | Author contacted | Additional information obtained from author <sup>#</sup> : | Notes:                                                      |
|---------------|-----------------|---------------------------------|-----------------------------------------------------------------------------------------------------------------------------|------------------------------------------------------------------------------------------------------------------------------------------------------------------------------------------------------------------------------|-------------------------------|----------------------|------------------|------------------------------------------------------------|-------------------------------------------------------------|
|               |                 |                                 | moderately obese and living a sedentary lifestyle (formal exercise less than 3x/week for a total of less than 90 min/week). |                                                                                                                                                                                                                              |                               |                      |                  |                                                            |                                                             |
| Sattin 2016   | USA             | 3, 12                           | Obese and overweight, and/or prediabetic (FPG of 100 mg/dl to 125 mg/dl).                                                   | Health Education intervention = 287<br>Fit body and soul intervention = 317                                                                                                                                                  | Weight; FBG                   | Unclear              | N                | N/A                                                        |                                                             |
| Schubel 2016  | Germany         | 3, 5.5, 11.5                    | Adults between 35-65 years, non-smokers and who are overweight or obese.                                                    | Control group = 52<br>Continuous Calorie Restriction = 49<br>Intermittent Calorie Restriction = 49                                                                                                                           | Weight; TC; HbA1c; HOMA-IR    | Low                  | Y                | Y                                                          | Data provided.                                              |
| Seligman 2011 | Brazil          | 3, 12                           | General population (patients with metabolic syndrome - no diabetics, more than half of the participants were hypertensive)  | Standard-of-care strategy = 25<br>Healthy diet and step counter = 25<br>Healthy diet and fitness = 26                                                                                                                        | Weight; TC; HDL; SBP; HOMA-IR | Low                  | Y                | Y                                                          | Data provided; Information available from previous reviews. |
| Shikany 2013  | USA             | 6, 12                           | General population                                                                                                          | Food-based diet = 60<br>Meal replacement = 60                                                                                                                                                                                | Weight; TC; HDL; SBP; FG      | Low                  | N                | N/A                                                        | Information available from previous reviews.                |
| Sikand 1988   | USA             | 4, 24                           | Women with obesity                                                                                                          | No exercisers = 15<br>Exercisers = 15                                                                                                                                                                                        | Weight                        | Unclear              | N                | N/A                                                        |                                                             |
| Silva 2010    | Portugal        | 4, 12, 36                       | Women with overweight or obesity, aged 25 to 50 (and pre-menopausal)                                                        | Comparison group = 116<br>Intervention = 123                                                                                                                                                                                 | Weight                        | Unclear              | Y                | N                                                          | Information available from previous reviews.                |
| Snel 2012     | The Netherlands | 4, 22                           | Adults with insulin-dependent Type 2 diabetes mellitus and obesity                                                          | VLCD only = 14<br>VLCD + exercise = 13                                                                                                                                                                                       | Weight; HbA1c; QoL            | Unclear              | N                | N/A                                                        |                                                             |
| Solbrig 2019  | UK              | 6, 12                           | General overweight and obese adult population                                                                               | Motivational interviewing = 58<br>Functional imagery training = 63                                                                                                                                                           | Weight; QoL                   | Unclear              | N                | N/A                                                        |                                                             |
| Somers 2012   | USA             | 6, 12, 18                       | Patients with knee pain and osteoarthritis                                                                                  | Standard Care = 51<br>Lifestyle behavioral weight management intervention only = 59<br>Lifestyle behavioral weight management intervention + Pain Coping Skills Training = 62<br>Pain Coping Skills Training only (N/A) = 60 | Weight                        | Low                  | Y                | Y                                                          | Data provided.                                              |
| Spring 2013   | USA             | 3, 6, 9, 12                     | Veterans receiving medical care from Veterans' Affairs department                                                           | MOVE standard care = 35<br>MOVE + personal digital assistant = 34                                                                                                                                                            | Weight                        | Unclear              | N                | N/A                                                        | Information available from previous reviews.                |
| Spring 2017   | USA             | 3, 6, 12                        | General adult population with obesity                                                                                       | Control self-guided program = 32<br>Standard weight loss program = 32<br>Technology-supported = 32                                                                                                                           | Weight                        | High                 | N                | N/A                                                        |                                                             |

| Study ID              | Country:  | Follow-up time points (months): | Population                                                                                                                                                                                                 | Study groups and number of participants randomised                                                                                                                                  | Outcome measures extracted*                              | Overall Risk of Bias | Author contacted | Additional information obtained from author <sup>#</sup> : | Notes:                                                      |
|-----------------------|-----------|---------------------------------|------------------------------------------------------------------------------------------------------------------------------------------------------------------------------------------------------------|-------------------------------------------------------------------------------------------------------------------------------------------------------------------------------------|----------------------------------------------------------|----------------------|------------------|------------------------------------------------------------|-------------------------------------------------------------|
| Stahre 2005           | Sweden    | 2.3, 6, 12, 18                  | General female population                                                                                                                                                                                  | Control = 43<br>Cognitive treatment = 62                                                                                                                                            | Weight                                                   | Unclear              | N                | N/A                                                        | Information available from previous reviews.                |
| Stahre 2007           | Sweden    | 2.3, 8.3, 14.3, 20.3            | Employed women who were childcare providers                                                                                                                                                                | Control Group (weight-reducing program) = 27<br>Cognitive treatment group = 27                                                                                                      | Weight                                                   | High                 | N                | N/A                                                        |                                                             |
| Stalonas 1978         | USA       | 2.3, 5.3, 14.3                  | People who are overweight                                                                                                                                                                                  | Basic weight loss program = 12<br>WL program plus contingency component = 12<br>WL program plus exercise and contingency components = 10<br>WL program plus exercise component = 10 | Weight                                                   | Unclear              | N                | N/A                                                        |                                                             |
| Stenius-Aarniala 2000 | Finland   | 3.2, 6, 12                      | People with asthma                                                                                                                                                                                         | Control = 19<br>Treatment with VLCD = 19                                                                                                                                            | Weight; QoL                                              | Unclear              | Y                | N                                                          | Information available from previous reviews.                |
| Stevens 1993          | USA       | 3, 6, 12, 18, 276               | Men and women aged 30 to 54 years with high-normal diastolic blood pressure from 80 through 89 mm hg.                                                                                                      | Control = 256<br>Intervention = 308                                                                                                                                                 | Weight; SBP                                              | Unclear              | Y                | Y                                                          | Data provided.                                              |
| Stevens 2001          | USA       | 6, 12, 18, 24, 30, 36           | Adults 30 to 54 years of age who had nonmedicated diastolic blood pressure of 83 to 89 mm Hg and systolic blood pressure less than 140 mm Hg and were 110% to 165% of their ideal body weight at baseline. | Control = 596<br>Intervention = 595<br>Sodium only intervention (N/A) = 594<br>Combined intervention (N/A) = 597                                                                    | Weight; SBP                                              | Unclear              | Y                | Y                                                          | Data provided. Information available from previous reviews. |
| Stolley 2017          | USA       | 6, 12                           | Early-stage (I-III) African American breast cancer survivors                                                                                                                                               | Moving Forward Self-Guided program = 121<br>Moving Forward Interventionist-Guided program = 125                                                                                     | Weight                                                   | Low                  | Y                | N                                                          |                                                             |
| Strobl 2013           | Germany   | 6, 12                           | General population                                                                                                                                                                                         | Control, Usual care = 239<br>Telephone aftercare = 228                                                                                                                              | Weight                                                   | Low                  | N                | N/A                                                        | Information available from previous reviews.                |
| Sundfor 2018          | Norway    | 3, 6, 12                        | Men and women aged 21-70 years with BMI 30-45.0                                                                                                                                                            | Continuous energy restriction = 58<br>Intermittent energy restriction = 54                                                                                                          | Weight; TC; SBP; HbA1c; FG                               | Low                  | N                | N/A                                                        |                                                             |
| Tapsell 2017          | Australia | 3, 12                           | Adult residents, 25-54 years, BMI 25-40kg/m2                                                                                                                                                               | Usual care (Control) = 126<br>Intervention Group = 125<br>Intervention plus food supplement group (N/A) = 126                                                                       | Weight; TC/HDL ratio; TC; SBP; HbA1c; QoL; Remission HTN | High                 | N                | N/A                                                        |                                                             |

| Study ID                           | Country:                                   | Follow-up time points (months):               | Population                                                                                      | Study groups and number of participants randomised                                                                                                            | Outcome measures extracted*                                                                               | Overall Risk of Bias | Author contacted | Additional information obtained from author <sup>†</sup> : | Notes:                                       |
|------------------------------------|--------------------------------------------|-----------------------------------------------|-------------------------------------------------------------------------------------------------|---------------------------------------------------------------------------------------------------------------------------------------------------------------|-----------------------------------------------------------------------------------------------------------|----------------------|------------------|------------------------------------------------------------|----------------------------------------------|
| TarragaMarcos 2017                 | Spain                                      | 0.5, 1, 3, 6, 12                              | Adult general obese/overweight population.                                                      | G3 = 55<br>G2 = 61<br>G1 = 60                                                                                                                                 | Weight; TC; HDL                                                                                           | Unclear              | Y                | N                                                          |                                              |
| Teeriniemi 2018                    | Finland                                    | 12, 24                                        | Residents aged 20–60 years living in the city of Oulu who were overweight or obese.             | Control = 89<br>SHG Counselling = 87<br>CBT Counselling = 85<br>Control plus HBCSS = 91<br>SHG Counselling plus HBCSS = 92<br>CBT Counselling plus HBCSS = 88 | Weight; HDL; SBP; FG                                                                                      | Unclear              | Y                |                                                            |                                              |
| ter Bogt 2009                      | Netherlands                                | 12, 36                                        | Patients 40–70 years of age with BMI: 25 to 40 and either hypertension or dyslipidemia or both. | GP usual care = 232<br>Lifestyle counselling from NP = 225                                                                                                    | Weight; TC; HDL; SBP; FG                                                                                  | Unclear              | N                | N/A                                                        |                                              |
| The Look AHEAD Research Group 2010 | USA                                        | 12, 24, 36, 48, 60, 72, 84, 96, 108, 115, 120 | Adults with Type 2 Diabetes Mellitus                                                            | Diabetes support and education = 2575<br>Intensive lifestyle intervention = 2570                                                                              | Weight; TC; HDL; SBP; QoL; Incidence CV morbidity; Incidence CV mortality; Incidence T2DM; Remission T2DM | High                 | N                | N/A                                                        | Information available from previous reviews. |
| Trepanowski 2017                   | USA                                        | 1, 2, 3, 4, 5, 6, 7, 8, 9, 10, 11, 12         | General population with a BMI $\geq 25$ .                                                       | No-intervention control group = 31<br>Daily calorie restriction group = 35<br>Alternate-day fasting group = 34                                                | Weight; HOMA-IR                                                                                           | High                 | Y                | Y                                                          | Data provided.                               |
| Tsai 2010                          | USA                                        | 3, 6, 12                                      | General population                                                                              | Control = 26<br>Brief counselling = 24                                                                                                                        | Weight; TC; HDL; SBP; FG                                                                                  | Unclear              | N                | N/A                                                        | Information available from previous reviews. |
| Tuomilehto 2009                    | Finland                                    | 3, 12, 24, 60                                 | Patients with mild obstructive sleep apnoea                                                     | Control = 41<br>Intervention = 40                                                                                                                             | Weight; TC; HDL; SBP; FBG; Plasma insulin; QoL                                                            | Low                  | N                | N/A                                                        | Information available from previous reviews. |
| van de Glind 2017                  | England, The Netherlands, Norway, Portugal | 3, 12                                         | Males                                                                                           | Comparison group = 553<br>EuroFIT group = 560                                                                                                                 | Weight; TC; SBP; HbA1c; QoL; Final timepoint only; Incidence CV morbidity                                 | High                 | Y                | Y                                                          | Information/data received.                   |
| vanWier 2011                       | Netherlands                                | 6, 24                                         | General population                                                                              | Control – Brochure = 460<br>Internet Group = 464<br>Phone Group = 462                                                                                         | Weight; TC; SBP                                                                                           | Low                  | N                | N/A                                                        |                                              |
| Viegner 1990                       | USA                                        | 1, 2, 3, 4, 5, 6, 12                          | General population                                                                              | Intermittent diet = 42<br>Standard treatment = 43                                                                                                             | Weight                                                                                                    | Unclear              | N                | N/A                                                        |                                              |

| Study ID              | Country: | Follow-up time points (months): | Population                                                                              | Study groups and number of participants randomised                                                                                              | Outcome measures extracted*                                 | Overall Risk of Bias | Author contacted | Additional information obtained from author <sup>#</sup> : | Notes:                                       |
|-----------------------|----------|---------------------------------|-----------------------------------------------------------------------------------------|-------------------------------------------------------------------------------------------------------------------------------------------------|-------------------------------------------------------------|----------------------|------------------|------------------------------------------------------------|----------------------------------------------|
| Vissers 2010          | Belgium  | 3, 6, 12                        | General overweight or obesity patients.                                                 | Control = 21<br>Diet only group (Diet) = 20<br>Diet + fitness training group (Fitness) = 20<br>Diet + WBV group (Vibration) = 18                | Weight; HDL; SBP; FBG; Final follow-up only: Incidence T2DM | Unclear              | N                | N/A                                                        | Information available from previous reviews. |
| Volpe 2008            | USA      | 3, 6, 9, 12                     | Adults with overweight/obesity                                                          | Exercise only = 34<br>Diet only = 28<br>Combination of diet and exercise = 28                                                                   | Weight; TC/HDL ratio; TC; SBP                               | High                 | Y                | Y                                                          | Data provided.                               |
| von Gruenigen 2012    | USA      | 3, 6, 12                        | Women who are overweight with histologically confirmed Stage I or II endometrial cancer | Control = 34<br>Intervention = 41                                                                                                               | Weight                                                      | Unclear              | N                | N/A                                                        | Information available from previous reviews. |
| vonGruenigen 2008     | USA      | 3, 6, 12                        | Women with endometrial cancer                                                           | Control, Usual care = 22<br>Lifestyle intervention = 23                                                                                         | Weight; QoL                                                 | Unclear              | N                | N/A                                                        |                                              |
| Wadden 1986           | USA      | 1, 3, 6, 16, 40, 64             | General population                                                                      | VLCD = 18<br>Behaviour = 18<br>Combined = 23                                                                                                    | Weight                                                      | Unclear              | N                | N/A                                                        | Information available from previous reviews. |
| Wadden 1994           | USA      | 0.32, 1, 2, 3, 4, 6, 12, 18     | Women from general population                                                           | Balanced deficit diet = 21<br>Very low-calorie diet = 28                                                                                        | Weight                                                      | Unclear              | N                | N/A                                                        | Information available from previous reviews. |
| Wadden 1998           | USA      | 1.85, 3.9, 5.5, 11.1, 23        | Women                                                                                   | Diet alone, Control = NS<br>Diet plus aerobic exercise = NS<br>Diet plus strength training = NS<br>Diet plus aerobic and strength training = NS | Weight                                                      | Unclear              | N                | N/A                                                        | Information available from previous reviews. |
| Wadden 2004           | USA      | 5, 10, 16                       | Community obese females                                                                 | Nondietering approach = 39<br>Balanced-deficit diet = 43<br>Meal replacement plan = 41                                                          | Weight                                                      | Unclear              | N                | N/A                                                        |                                              |
| Waleekhachonloet 2007 | Thailand | 3, 6, 12                        | Women from a rural community                                                            | Individual behavior therapy = 67<br>Group behavior therapy = 65                                                                                 | Weight                                                      | Unclear              | N                | N/A                                                        |                                              |
| Weinstock 2013        | USA      | 6, 12, 24, 36                   | Adults with metabolic syndrome                                                          | Conference Call DPP = 128<br>Individual Call DPP = 129                                                                                          | Weight; TC; SBP; FG                                         | Unclear              | Y                | N                                                          |                                              |
| West 2007             | USA      | 6, 12, 18                       | Women with type 2 diabetes treated by oral diabetes medications but not insulin         | Attention control = 108<br>Motivational interviewing = 109                                                                                      | Weight; HbA1c                                               | Unclear              | N                | N/A                                                        |                                              |
| West 2011             | USA      | 4, 12                           | Older-adult participants                                                                | Control = 112<br>Lifestyle Intervention = 116                                                                                                   | Weight                                                      | Unclear              | Y                | Y                                                          | Data provided.                               |
| West 2016             | USA      | 6, 18                           | Healthy individuals with overweight/obesity                                             | Internet behavioral weight control treatment = 199<br>Internet behavioral weight control treatment + Motivational interviewing = 199            | Weight                                                      | Unclear              | N                | N/A                                                        |                                              |

| Study ID     | Country: | Follow-up time points (months):  | Population                                                                                                                                                                                  | Study groups and number of participants randomised                                                                                                                                                                                                                                                                               | Outcome measures extracted*                             | Overall Risk of Bias | Author contacted | Additional information obtained from author <sup>†</sup> : | Notes:                                       |
|--------------|----------|----------------------------------|---------------------------------------------------------------------------------------------------------------------------------------------------------------------------------------------|----------------------------------------------------------------------------------------------------------------------------------------------------------------------------------------------------------------------------------------------------------------------------------------------------------------------------------|---------------------------------------------------------|----------------------|------------------|------------------------------------------------------------|----------------------------------------------|
| Whelton 1998 | USA      | 6, 9, 12, 15, 18, 21, 24, 27, 30 | Adults 60-80 years, with systolic blood pressure lower than 145 mm Hg and diastolic blood pressure lower than 85 mm Hg while receiving treatment with a single antihypertensive medication. | Non-weight loss (Usual lifestyle, control group plus sodium reduction) = NS<br>Weight loss (Weight loss alone plus weight loss and sodium reduction combined intervention) = NS                                                                                                                                                  | Weight                                                  | High                 | N                | N/A                                                        | Information available from previous reviews. |
| Wilson 2010  | USA      | 5.5, 12, 24                      | Adults with a BMI between 27 and 45 who met DSM-IV criteria for BED                                                                                                                         | Guided Self-help Based on CBT = 66<br>Behavioral Weight Loss Treatment = 64<br>Interpersonal Psychotherapy = 75                                                                                                                                                                                                                  | Weight                                                  | High                 | Y                | N                                                          |                                              |
| Wilson 2016  | USA      | 3, 6, 12                         | General population                                                                                                                                                                          | Control - Self Study Group = 242<br>Phone Fuel Your Life = 182<br>Group Fuel Your Life = 236                                                                                                                                                                                                                                     | Weight                                                  | Unclear              | Y                | N                                                          |                                              |
| Wilson 2016b | USA      | 6, 12                            | General population                                                                                                                                                                          | Control = 457<br>FUEL Your Life peer health coaches + nurse education = 459                                                                                                                                                                                                                                                      | Weight                                                  | High                 | Y                | Y                                                          | Data provided.                               |
| Wing 1985    | USA      | 4, 16                            | Seventy-five percent of the patients were on oral medication for their diabetes, and 63% were on hypertensive medication                                                                    | Standard-care condition = NS<br>Nutrition education = NS<br>Behavior modification = NS                                                                                                                                                                                                                                           | Weight                                                  | Unclear              | Y                | N                                                          | Information available from previous reviews. |
| Wing 1988    | USA      | 2, 14                            | Type 2 diabetes                                                                                                                                                                             | Diet plus placebo exercise = 13<br>Diet plus moderate exercise = 12                                                                                                                                                                                                                                                              | Weight; TC; HDL; SBP; HbA1c                             | Unclear              | N                | N/A                                                        |                                              |
| Wing 1988b   | USA      | 2, 14                            | Type 2 diabetes patients                                                                                                                                                                    | Diet only = 15<br>Diet plus exercise = 15                                                                                                                                                                                                                                                                                        | Weight; TC; HDL; SBP; HbA1c; FG; Plasma insulin         | Unclear              | N                | N/A                                                        |                                              |
| Wing 1991    | USA      | 5, 17                            | Overweight and obese people with type 2 diabetes                                                                                                                                            | Behavior therapy alone = 19<br>Behavior therapy plus VLCD = 17                                                                                                                                                                                                                                                                   | Weight; TC/HDL ratio; TC; HDL; HbA1c; FG                | Unclear              | N                | N/A                                                        | Information available from previous reviews. |
| Wing 1996    | USA      | 6, 18                            | General population of overweight women                                                                                                                                                      | Standard Behavioral Treatment (SBT) = 40<br>SBT plus structured meal plans and grocery lists (menu) = 41<br>SBT plus structured meal plans plus food provision with participants sharing the cost of the food (Buy food) = 41<br>SBT plus structured meal plans plus food provision with the food provided free (free food) = 41 | Weight                                                  | Unclear              | N                | N/A                                                        |                                              |
| Wing 1998    | USA      | 6, 12, 24                        | Overweight participants who had one or two parents with diabetes                                                                                                                            | Control = 40<br>Diet = 37                                                                                                                                                                                                                                                                                                        | Weight; TC/HDL ratio; TC; HDL; SBP; HbA1c; FG; At final | Unclear              | N                | N/A                                                        | Information available from previous reviews. |



| Study ID         | Country:  | Follow-up time points (months): | Population                                                                                                                                                                                   | Study groups and number of participants randomised                                                                                                               | Outcome measures extracted*                                       | Overall Risk of Bias | Author contacted | Additional information obtained from author <sup>†</sup> : | Notes:                                                      |
|------------------|-----------|---------------------------------|----------------------------------------------------------------------------------------------------------------------------------------------------------------------------------------------|------------------------------------------------------------------------------------------------------------------------------------------------------------------|-------------------------------------------------------------------|----------------------|------------------|------------------------------------------------------------|-------------------------------------------------------------|
|                  |           |                                 |                                                                                                                                                                                              | Exercise = 37<br>Diet plus exercise = 40                                                                                                                         | follow-up only:<br>Incidence T2DM                                 |                      |                  |                                                            |                                                             |
| Wing 2003        | USA       | 5, 11                           | Obesity patients                                                                                                                                                                             | No break group (control) = 48<br>Long break group = 47<br>Short break group = 47                                                                                 | Weight                                                            | Unclear              | Y                | N                                                          |                                                             |
| Wing 2010        | USA       | 6, 12, 18                       | Women over 30 years who are overweight or obese with at least 10 urinary incontinence episodes per week.                                                                                     | Structured Education Program = 112<br>Weight Loss Intervention (Skills Based maintenance) = 113<br>Weight Loss Intervention (Motivation Based maintenance) = 113 | Weight                                                            | Low                  | N                | N/A                                                        |                                                             |
| Yannakoulia 2008 | Greece    | 2, 12                           | Type 2 diabetes mellitus patients                                                                                                                                                            | Usual care group = 15<br>Intensive care group = 15                                                                                                               | Weight; HbA1c                                                     | High                 | Y                | Y                                                          | Data provided; Information available from previous reviews. |
| Yardley 2014     | UK        | 6, 12                           | GP patients                                                                                                                                                                                  | Usual care = 43<br>Web-based only = 45<br>Basic nurse support = 44<br>Regular nurse support = 47                                                                 | Weight                                                            | High                 | N                | N/A                                                        | Information available from previous reviews.                |
| Yates 2009       | UK        | 3, 6, 12, 24                    | Patients with impaired glucose tolerance                                                                                                                                                     | Control group = 34<br>PREPARE with pedometer = 33<br>PREPARE group = 31                                                                                          | Weight; TC; HDL; SBP; FG; At final follow-up only: Incidence T2DM | Low                  | N                | N/A                                                        | Information available from previous reviews.                |
| Yates 2018       | USA       | 4, 12                           | Obese, postmenopausal women with prediabetes and normal endometrial biopsy; Participants were recruited from the community, Harris Health System, and employees at MD Anderson Cancer Center | Placebo + no lifestyle = 8<br>Metformin + no lifestyle (N/A) = 7<br>Placebo + lifestyle = 7<br>Metformin + lifestyle (N/A) = 7                                   | Weight                                                            | High                 | Y                | N                                                          | Information available from previous reviews.                |
| Yeh 2003         | USA       | 6, 12, 24                       | General population (women)                                                                                                                                                                   | Counseling based intervention = 40<br>Skills based intervention = 40                                                                                             | Weight;                                                           | High                 | N                | N/A                                                        |                                                             |
| Yeh 2016         | USA       | 6, 12                           | Chinese immigrants with prediabetes living in New York City                                                                                                                                  | Control group = 30<br>Intervention group = 30                                                                                                                    | Weight; TC; SBP; HbA1c                                            | Unclear              | Y                | N                                                          | Information available from previous reviews.                |
| Yin 2018         | China     | 6, 12                           | Women with pre-diabetes                                                                                                                                                                      | Comparison-Control Group = 75<br>Intervention Group = 109                                                                                                        | Weight; HbA1c; FG                                                 | Unclear              | N                | N/A                                                        |                                                             |
| Zhang 2016       | China     | 6, 12, 24                       | Patients with Nonalcoholic Fatty Liver Disease                                                                                                                                               | Control = 74<br>Moderate exercise = 73<br>Vigorous-moderate exercise = 73                                                                                        | Weight; TC; HDL; SBP; FG                                          | Low                  | N                | N/A                                                        | Information available from previous reviews.                |
| Zwickert 2016    | Australia | 3, 6, 9, 15                     | General population                                                                                                                                                                           | CBT + Minimal = 29<br>CBT + Intensive = 31                                                                                                                       | Weight                                                            | High                 | N                | N/A                                                        | Information available from previous reviews.                |

| Study ID                                                                                                                                                                                                                                                                                                                                                                                                                                                                                                                                                                                                                                                                                                                                                                                                                                                                                                                                                                                                                                                                                            | Country: | Follow-up time points (months): | Population | Study groups and number of participants randomised | Outcome measures extracted* | Overall Risk of Bias | Author contacted | Additional information obtained from author <sup>#</sup> : | Notes: |
|-----------------------------------------------------------------------------------------------------------------------------------------------------------------------------------------------------------------------------------------------------------------------------------------------------------------------------------------------------------------------------------------------------------------------------------------------------------------------------------------------------------------------------------------------------------------------------------------------------------------------------------------------------------------------------------------------------------------------------------------------------------------------------------------------------------------------------------------------------------------------------------------------------------------------------------------------------------------------------------------------------------------------------------------------------------------------------------------------------|----------|---------------------------------|------------|----------------------------------------------------|-----------------------------|----------------------|------------------|------------------------------------------------------------|--------|
| <p><b>BED:</b> Binge Eating Disorder; <b>BMI:</b> Body Mass Index (kg/m<sup>2</sup>); <b>CBT:</b> Cognitive Behaviour Therapy; <b>CV:</b> Cardiovascular; <b>DPP:</b> Diabetes Prevention Program; <b>FG:</b> Fasting glucose (including fasting plasma glucose and other glucose measures); <b>HbA1c:</b> Haemoglobin A1C; <b>HDL:</b> High-density lipoprotein cholesterol; <b>N:</b> No; <b>HOMA-IR:</b> Homeostatic Model Assessment of Insulin Resistance; <b>HTN:</b> Hypertension; <b>MI:</b> Motivational interviewing; <b>MR:</b> Meal replacement; <b>N/A:</b> Not applicable; <b>NS:</b> Not specified; <b>QoL:</b> Quality of Life; <b>SBP:</b> Systolic Blood Pressure; <b>T2DM:</b> Type 2 Diabetes Mellitus; <b>TC:</b> Total cholesterol; <b>TC/HDL:</b> Total cholesterol/High-density lipoprotein ratio; <b>VLCD:</b> Very low calorie diet; <b>Y:</b> Yes.</p> <p>*Not all outcomes measures collected at all follow-up time points; Outcome measures collected at baseline only not listed.</p> <p><sup>#</sup> Additional information or data obtained from study authors.</p> |          |                                 |            |                                                    |                             |                      |                  |                                                            |        |

**Table 4. Baseline demographics**

| Study ID                | Groups:                                        | Randomised | Number of participants reported at baseline | Gender (%F) | Age  |      | BMI  |     | Comorbidities at baseline (%) * |            |              |
|-------------------------|------------------------------------------------|------------|---------------------------------------------|-------------|------|------|------|-----|---------------------------------|------------|--------------|
|                         |                                                |            |                                             |             | Mean | SD   | Mean | SD  | CV morbidity                    | Type II DM | Hypertension |
| Abed 2013               | Control                                        | 75         | 75                                          | 33          | 60.3 | 10.3 | 33.8 | 4.1 | 100                             | 28         | 87           |
|                         | Weight Management                              | 75         | 75                                          | 32          | 59.8 | 9.5  | 32.8 | 3.5 | 100                             | 24         | 83           |
| Ackermann 2011          | Standard advice alone (controls)               | 46         | 46                                          | 61          | 60.1 | 10.5 | 30.8 | 5.1 | NR                              | NR         | NR           |
|                         | YMCA DPP intervention                          | 46         | 46                                          | 50          | 56.5 | 9.7  | 32.0 | 4.8 | NR                              | NR         | NR           |
| Agras 1990              | Computer alone                                 | 30         | 30                                          | 100         | 45.2 | 12.4 | 29.7 | 4.3 | NR                              | NR         | NR           |
|                         | Computer + group support                       | 30         | 30                                          |             |      |      |      |     | NR                              | NR         | NR           |
|                         | Behaviour therapy                              | 30         | 30                                          |             |      |      |      |     | NR                              | NR         | NR           |
| Ahern 2017              | Brief intervention                             | 211        | 211                                         | 68          | 51.9 | 14.1 | 34.4 | 4.6 | NR                              | 13.5       | 49.8         |
|                         | 12-week behavioural weight-loss programme      | 530        | 528                                         | 68          | 53.6 | 13.3 | 34.7 | 5.4 |                                 |            |              |
|                         | 52-week behavioural weight-loss programme      | 528        | 528                                         | 68          | 53.3 | 14.0 | 34.5 | 5.1 |                                 |            |              |
| Almanza - Aguilera 2018 | Control (general recommendations)              | 48         | 27                                          | 100         | 44.4 | 3.3  | 36.3 | 5.7 | NR                              | 0          | NR           |
|                         | Treatment (lifestyle weight loss intervention) | 67         | 30                                          | 100         | 45.7 | 3.5  | 35.4 | 4.1 | NR                              | 0          | NR           |
| Ames 2005               | Standard behavioural treatment                 | NR         | 13                                          | 100         | 21.5 | 2.2  | NR   | NR  | NR                              | NR         | NR           |
|                         | Reformulated cognitive-behavioural treatment   | NR         | 13                                          |             |      |      |      |     | NR                              | NR         | NR           |
| Andersen 1999           | Diet + Lifestyle Activity                      | 20         | 20                                          | 100         | 42.9 | 7.9  | 32.4 | 4.5 | NR                              | NR         | NR           |
|                         | Diet + Aerobic Group                           | 20         | 20                                          | 100         | 43.2 | 9.1  | 31.4 | 3.7 | NR                              | NR         | NR           |
| Anderson 2014           | Control (weight loss booklet only)             | 166        | 166                                         | 26          | 63.6 | 6.7  | 30.4 | 3.9 | NR                              | 14.3       | NR           |
|                         | Intervention (BeWEL)                           | 163        | 163                                         | 26          | 63.5 | 7.0  | 31.0 | 4.5 | NR                              |            | NR           |
| Annesi 2016             | Comparison treatment                           | 55         | 110                                         | 100         | 48.2 | 7.8  | 35.3 | 3.2 | NR                              | NR         | NR           |
|                         | Experimental treatment                         | 55         |                                             |             |      |      |      |     | NR                              | NR         | NR           |
| Annesi 2017             | Control comparison group                       | 54         | 107                                         | 100         | 48.6 | 7.1  | 35.4 | 3.3 | NR                              | NR         | NR           |
|                         | Experimental group                             | 53         |                                             |             |      |      |      |     | NR                              | NR         | NR           |
| Appel 2011              | Control (Self-directed)                        | 138        | 138                                         | 63.8        | 52.9 | 10.1 | 36.8 | 5.1 | NR                              | 23.8       | 76.8         |
|                         | Remote Support Only (N/A)                      | 139        | N/A                                         | N/A         | N/A  | N/A  | N/A  | N/A | N/A                             | N/A        | N/A          |
|                         | In-Person Support                              | 138        | 138                                         | 63.8        | 53.3 | 10.5 | 36.8 | 5.2 | NR                              | 23.9       | 71.0         |
| Ard 2004                | “advice only” comparison group                 | 273        | 273                                         | 63          | 49.5 | 8.8  | 32.9 | 5.6 | NR                              | NR         | 14.0         |
|                         | “established” behavioural intervention group   | 268        | 268                                         | 64.9        | 50.2 | 8.6  | 33.0 | 5.5 | NR                              | NR         | 13.7         |
|                         | Established + DASH Intervention Group          | 269        | 269                                         | 57.2        | 50.2 | 9.2  | 33.3 | 6.3 | NR                              | NR         | 13.8         |
| Ard 2018                | Exercise Only                                  | 54         | 54                                          | 68.5        | 69.9 | 4.5  | 33.9 | 0.4 | NR                              | NR         | NR           |
|                         | Exercise + Diet Quality + Weight Maintenance   | 55         | 55                                          | 60          | 70.5 | 4.8  | 33.8 | 0.4 | NR                              | NR         | NR           |
|                         | Exercise + Diet Quality + Weight Loss          | 55         | 55                                          | 58.2        | 70.3 | 4.8  | 33.3 | 0.4 | NR                              | NR         | NR           |
| Ash 2006                | Control Group - Booklet only                   | 63         | 54                                          | 77.8        | 47   | 14   | 35.8 | 6.2 | NR                              | NR         | NR           |
|                         | Individualised Dietetic Treatment              | 66         | 65                                          | 75.4        | 48   | 13   | 34.2 | 5.9 | NR                              | NR         | NR           |
|                         | Fat Booters Incorporated                       | 62         | 57                                          | 66.7        | 49   | 13   | 33.7 | 4.6 | NR                              | NR         | NR           |
| Ashley 2001             | Control, Diet                                  | 37         | 37                                          | 100         | 42.3 | 4.1  | 29.9 | 2.6 | NR                              | NR         | NR           |
|                         | MR - Physician/Nurse led                       | 38         | 38                                          | 100         | 41   | 5.7  | 30.1 | 3.7 | NR                              | NR         | NR           |
|                         | MR - Dietician lead                            | 38         | 38                                          | 100         | 41   | 4.3  | 30.1 | 2.9 | NR                              | NR         | NR           |
| Ashley 2007             | Control, TFG - Traditional Food Group          | 35         | 35                                          | 100         | 39.8 | 6.1  | 29.5 | 3.1 | NR                              | NR         | NR           |
|                         | MRG - Meal Replacement Group                   | 35         | 35                                          | 100         | 36.7 | 6.3  | 29.1 | 2.4 | NR                              | NR         | NR           |

| Study ID       | Groups:                                                          | Randomised | Number of participants reported at baseline | Gender (%F) | Age               |                        | BMI               |                         | Comorbidities at baseline (%) * |            |              |
|----------------|------------------------------------------------------------------|------------|---------------------------------------------|-------------|-------------------|------------------------|-------------------|-------------------------|---------------------------------|------------|--------------|
|                |                                                                  |            |                                             |             | Mean              | SD                     | Mean              | SD                      | CV morbidity                    | Type II DM | Hypertension |
| Aveyard 2016   | Advice only                                                      | 942        | 942                                         | 57          | 56.2              | 15.6                   | 35.1              | 5.1                     | NR                              | NR         | NR           |
|                | Advice plus weight loss programme                                | 940        | 940                                         | 57.3        | 55.8              | 16.5                   | 34.8              | 4.6                     | NR                              | NR         | NR           |
| Azar 2013      | Control, Usual care                                              | NR         | 81                                          | 45.7        | 52.5              | 10.6                   | 32.4              | 6.3                     | NR                              | NR         | NR           |
|                | Self-directed                                                    | NR         | 81                                          | 45.7        | 51.8              | 9.9                    | 31.7              | 4.7                     | NR                              | NR         | NR           |
|                | Coach-led                                                        | NR         | 79                                          | 48.1        | 54.6              | 11.0                   | 31.8              | 5.1                     | NR                              | NR         | NR           |
| Bacon 2002     | Health at Every Size - control                                   | NR         | 29                                          | 100         | 39.3              | 4.5                    | 35.9              | 4.1                     | NR                              | NR         | NR           |
|                | Diet Group - intervention                                        | NR         | 23                                          |             |                   |                        | 36.6              | 4.1                     | NR                              | NR         | NR           |
| Barnes 2017    | Treatment as usual (N/A)                                         | 30         | 30                                          | N/A         | N/A               | N/A                    | N/A               | N/A                     | N/A                             | N/A        | N/A          |
|                | Nutrition - ATTENTION CONTROL                                    | 29         | 29                                          | 69          | 48.9              | 11.6                   | 35.1              | 7.5                     | NR                              | NR         | NR           |
|                | Motivational interviewing                                        | 30         | 30                                          | 80          | 47.1              | 10.0                   | 34.7              | 7.1                     | NR                              | NR         | NR           |
| Bartels 2015   | Control, Fitness club membership                                 | 106        | 106                                         | 55          | 43.5              | 11.6                   | 37.5              | 8.8                     | NR                              | NR         | NR           |
|                | IN SHAPE                                                         | 104        | 104                                         | 47          | 44.3              | 10.9                   | 36.2              | 7.5                     | NR                              | NR         | NR           |
| Beavers 2017   | Weight loss                                                      | 82         | 82                                          | 72          | 66.3              | 4.5                    | 34.7              | 4.0                     | 23.2                            | 15.9       | 69.5         |
|                | Weight loss + Aerobic training                                   | 86         | 86                                          | 72.1        | 67.5              | 5.1                    | 33.9              | 3.5                     | 27.9                            | 22.1       | 77.9         |
|                | Weight loss + Resistance training                                | 81         | 81                                          | 69.1        | 66.9              | 4.4                    | 34.8              | 3.6                     | 27.2                            | 19.8       | 74.1         |
| Beeken 2017    | Usual care                                                       | 267        | 267                                         | 64.8        | 60 <sup>a</sup>   | 48.9-67.1 <sup>a</sup> | 34.8 <sup>a</sup> | 32.6-39.4 <sup>a</sup>  | NR                              | NR         | NR           |
|                | 10TT                                                             | 270        | 270                                         | 66.7        | 59.1 <sup>a</sup> | 48.1-66.1 <sup>a</sup> | 35 <sup>a</sup>   | 32.6-38.7 <sup>a</sup>  | NR                              | NR         | NR           |
| Bennett 1986   | Group Contact Control                                            | NR         | 74                                          | 100         | 40.1              | NR                     | 32.7              | NR                      | NR                              | NR         | NR           |
|                | Individual Contact Control                                       | NR         |                                             |             |                   |                        |                   |                         | NR                              | NR         | NR           |
|                | Insight Control                                                  | NR         |                                             |             |                   |                        |                   |                         | NR                              | NR         | NR           |
|                | Cognitive Rehearsal                                              | NR         |                                             |             |                   |                        |                   |                         | NR                              | NR         | NR           |
| Bennett 2012   | Control, Usual care                                              | 185        | 185                                         | 65.9        | 54.7              | 11.0                   | 36.99             | 5.2                     | NR                              | NR         | NR           |
|                | Be Fit, Be Well                                                  | 180        | 180                                         | 71.1        | 54.6              | 10.8                   | 37.03             | 5.0                     | NR                              | NR         | NR           |
| Bennett 2013   | Control, usual care                                              | 97         | 94                                          | 100         | 35.2              | 5.5                    | 30.2              | 2.4                     | NR                              | 5.3        | 36.2         |
|                | Weight gain prevention intervention                              | 97         | 91                                          | 100         | 35.6              | 5.5                    | 30.1              | 2.7                     | NR                              | 5.8        | 36.3         |
| Berendsen 2011 | Standard combined lifestyle intervention                         | 164        | 164                                         | 64          | 53.8              | 12.4                   | 35                | 4.6                     | NR                              | 48.9       | NR           |
|                | Supervised combined lifestyle intervention                       | 247        | 247                                         | 65.2        | 55.9              | 12.3                   | 34.2              | 4.2                     | NR                              |            | NR           |
| Berry 2014     | Control                                                          | 162        | 162                                         | 92.6        | 36.8              | 8.1                    | 39.1              | 8.3                     | NR                              | NR         | NR           |
|                | Family based. Nutrition, exercise and coping skills intervention | 184        | 184                                         | 92.9        | 36.9              | 8.1                    | 36.4              | 8.3                     | NR                              | NR         | NR           |
| Bertram 1990   | Control - diet only                                              | 15         | 8                                           | 100         | 37.4              | 1.6 <sup>b</sup>       | 34.3              | 1.3 <sup>b</sup>        | NR                              | NR         | NR           |
|                | Diet plus lectures                                               | 15         | 15                                          | 100         | 38.4              | 1.8 <sup>b</sup>       | 34.8              | 1.3 <sup>b</sup>        | NR                              | NR         | NR           |
|                | Diet plus exercise                                               | 15         | 13                                          | 100         | 37.2              | 1.8 <sup>b</sup>       | 34.6              | 1.6 <sup>b</sup>        | NR                              | NR         | NR           |
| Bertz 2012     | Control                                                          | 17         | 17                                          | 100         | 32.2              | 4.6                    | 30.2              | 3.4                     | NR                              | NR         | NR           |
|                | Diet Only                                                        | 17         | 17                                          | 100         | 33.7              | 4.2                    | 33.7              | 2.6                     | NR                              | NR         | NR           |
|                | Exercise only                                                    | 18         | 18                                          | 100         | 33.2              | 3.7                    | 33.2              | 3.1                     | NR                              | NR         | NR           |
|                | Intervention                                                     | 16         | 16                                          | 100         | 33.9              | 4.5                    | 33.9              | 2.2                     | NR                              | NR         | NR           |
| Beutel 2006    | Behavioural therapy                                              | 130        | 130                                         | 85          | 42.3              | 20-60 <sup>c</sup>     | 43.9              | 35.2, 73.3 <sup>c</sup> | NR                              | NR         | NR           |
|                | Psychodynamic treatment                                          | 137        | 137                                         | 86          | 40.3              | 20-64 <sup>c</sup>     | 44.6              | 35.1, 73.5 <sup>c</sup> | NR                              | NR         | NR           |
| Bliddal 2011   | Control, low-energy diet                                         | 45         | 45                                          | 88.9        | 64.1              | 10.5                   | 35.2              | 4.5                     | NR                              | NR         | NR           |

| Study ID         | Groups:                                                                   | Randomised | Number of participants reported at baseline | Gender (%F) | Age   |      | BMI               |                         | Comorbidities at baseline (%) * |            |              |
|------------------|---------------------------------------------------------------------------|------------|---------------------------------------------|-------------|-------|------|-------------------|-------------------------|---------------------------------|------------|--------------|
|                  |                                                                           |            |                                             |             | Mean  | SD   | Mean              | SD                      | CV morbidity                    | Type II DM | Hypertension |
| Bo 2007          | Intensive low-energy diet                                                 | 44         | 44                                          | 88.6        | 61.1  | 11.1 | 36                | 5.5                     | NR                              | NR         | NR           |
|                  | Control standard care                                                     | 188        | 166                                         | 57.8        | 55.7  | 5.6  | 29.8              | 4.6                     | NR                              | NR         | 36.1         |
|                  | Intervention lifestyle by trained professional                            | 187        | 169                                         | 58.6        | 55.7  | 5.7  | 29.7              | 4.1                     | NR                              | NR         | 36.1         |
| Brown 2014       | Control                                                                   | 66         | 66                                          | 70          | 44.9  | 10.1 |                   | 3.4                     | NR                              | NR         | NR           |
|                  | RENEW                                                                     | 70         | 70                                          | 64          | 44.4  | 11.7 |                   | 2.6                     | NR                              | NR         | NR           |
| Burke 2005       | Control usual care                                                        | 118        | 118                                         | 57          | 55.3  | 7.5  | 29.7              | 2.5                     | NR                              | NR         | 100          |
|                  | Low sodium + fish diet                                                    | 123        | 123                                         | 54.5        | 57.1  | 7.2  | 30.4              | 2.9                     | NR                              | NR         | 100          |
| Burke 2015       | Standard behavioural weight loss treatment                                | 72         | 72                                          | 83.1        | 53    | 9.6  | 33.2              | 4.11                    | NR                              | NR         | NR           |
|                  | Self-efficacy enhancement plus standard behavioural weight loss treatment | 58         | 58                                          |             |       |      |                   |                         |                                 |            |              |
| Cesa 2013        | Integrated Multimodal Medically Managed Inpatient Program                 | 29         | 19                                          | 100         | 32.2  | 6.4  | 41.8              | 6.3                     | NR                              | NR         | NR           |
|                  | Cognitive Behavior Therapy                                                | 30         | 20                                          | 100         | 29.9  | 8.0  | 41.1              | 3.3                     | NR                              | NR         | NR           |
|                  | VR-Enhanced Cognitive Behavior Therapy                                    | 31         | 27                                          | 100         | 32.9  | 8.8  | 39.2              | 5.3                     | NR                              | NR         | NR           |
| Chaiyasoot 2018  | Control, Lifestyle Education Intervention                                 | 52         | 52                                          | 78.8        | 43.2  | 11.9 | 33.1 <sup>a</sup> | 30, 38.3 <sup>a</sup>   | NR                              | NR         | NR           |
|                  | Lifestyle Education Intervention plus Meal Replacements                   | 58         | 58                                          | 86.2        | 41.8  | 11.8 | 32 <sup>a</sup>   | 30.4, 37.6 <sup>a</sup> | NR                              | NR         | NR           |
| Chee 2017        | Usual Care                                                                | 115        | 115                                         | 48.7        | 54    | 8    | 28.9              | 6.3                     | NR                              | 100        | NR           |
|                  | tDNA Conventional Counseling                                              | 57         | 57                                          | 87.4        | 55    | 8    | 29.4              | 7.3                     | NR                              | 100        | NR           |
|                  | tDNA Motivational Interviewing                                            | 58         | 58                                          | 67.2        | 55    | 8    | 30.7              | 8.2                     | NR                              | 100        | NR           |
| Cheskin 2008     | Standard diet                                                             | 58         | 58                                          | 58.6        | 55.48 | 7.2  | 35.7              | 3.8                     | NR                              | 100        | NR           |
|                  | Meal replacement                                                          | 54         | 54                                          | 53.7        | 54.6  | 7.0  | 35.3              | 3.5                     | NR                              | 100        | NR           |
| Cheyette 2007    | Control                                                                   | 20         | 20                                          | 40          | 58    | 10.7 | 31.7              | 5.4                     | NR                              | 100        | NR           |
|                  | Weight No More intervention group                                         | 29         | 29                                          | 51.7        | 56.7  | 9.7  | 34.1              | 4.7                     | NR                              | 100        | NR           |
| Christensen 2012 | Reference group                                                           | 44         | 44                                          | 100         | 46    | 8.6  | 30.4              | 4.9                     | NR                              | NR         | NR           |
|                  | Intervention group                                                        | 54         | 54                                          | 100         | 45.7  | 6.36 | 30.5              | 5.4                     | NR                              | NR         | NR           |
| Cleo 2018        | Wait list control (N/A)                                                   | 25         | N/A                                         | N/A         | N/A   | N/A  | N/A               | N/A                     | N/A                             | N/A        | N/A          |
|                  | TTT Top Ten Tips habit formation                                          | 25         | 25                                          | 80          | 48.2  | 11.3 | 34.6              | 5.2                     | NR                              | NR         | NR           |
|                  | DSD Do Something Different online software                                | 25         | 25                                          | 76          | 51.3  | 10.0 | 35.2              | 7.4                     | NR                              | NR         | NR           |
| Cole 2013        | Control - individualised counselling                                      | 31         | 31                                          | 51          | 55    | 9.9  | 31.4              | 4.8                     | NR                              | NR         | 19           |
|                  | Intervention- shared medical appointment                                  | 34         | 34                                          | 41          | 61.2  | 8.4  | 30.3              | 5                       | NR                              | NR         | 25           |
| Conroy 2015      | Self-guided                                                               | 50         | 49                                          | 100         | 54    | 5.6  | 33.4              | 5.4                     | NR                              | 23.5       | 56.1         |
|                  | Interventionist led                                                       | 49         | 49                                          | 100         | 53.8  | 5.3  | 36.1              | 5.4                     | NR                              |            |              |
| Cooper 2010      | Guided Self-Help Control                                                  | 51         | 51                                          | 100         | 41.86 | 8.67 | 35.41             | 2.71                    | NR                              | 0          | NR           |
|                  | Behaviour Therapy                                                         | 50         | 50                                          | 100         | 41.38 | 9.90 | 34.79             | 3.06                    | NR                              | 0          | NR           |
|                  | Cognitive Behaviour Therapy                                               | 49         | 49                                          | 100         | 41.2  | 8.77 | 33.85             | 2.71                    | NR                              | 0          | NR           |
| Cousins 1992     | Control                                                                   | 56         | 27                                          | 100         | 33.8  | 7.0  | 31.6              | 4.9                     | NR                              | NR         | NR           |
|                  | Individual                                                                | 56         | 32                                          | 100         | 33.6  | 6.4  | 31.7              | 5.0                     | NR                              | NR         | NR           |
|                  | Family                                                                    | 56         | 27                                          | 100         | 32.8  | 6.1  | 30.3              | 4.5                     | NR                              | NR         | NR           |
| Craighead 1989   | Control, minimal contact                                                  | 20         | 11                                          | NR          | NR    | NR   | NR                | NR                      | NR                              | NR         | NR           |
|                  | Contracted Exercise                                                       | 20         | 14                                          | NR          | NR    | NR   | NR                | NR                      | NR                              | NR         | NR           |
|                  | Supervised Exercise                                                       | 22         | 17                                          | NR          | NR    | NR   | NR                | NR                      | NR                              | NR         | NR           |

| Study ID                             | Groups:                                         | Randomised | Number of participants reported at baseline | Gender (%F) | Age  |                     | BMI  |                  | Comorbidities at baseline (%) * |                          |              |
|--------------------------------------|-------------------------------------------------|------------|---------------------------------------------|-------------|------|---------------------|------|------------------|---------------------------------|--------------------------|--------------|
|                                      |                                                 |            |                                             |             | Mean | SD                  | Mean | SD               | CV morbidity                    | Type II DM               | Hypertension |
| Crowley 2017                         | Group Medical Visit                             | 136        | 136                                         | 8.1         | 60.4 | 8.3                 | 35   | 4.8              | 75.7                            | 100                      | 87.5         |
|                                      | Intensive Weight Management Group Medical Visit | 127        | 127                                         | 13.4        | 61   | 8.1                 | 35.6 | 5.4              | 83.5                            | 100                      | 91.3         |
| Dale 2009                            | Control                                         | 23         | 23                                          | 74          | 45   | 30, 68 <sup>c</sup> | 36.5 | 4.3              | NR                              | NR                       | NR           |
|                                      | Modest                                          | 31         | 31                                          | 61          | 48   | 32, 62 <sup>c</sup> | 33.9 | 4.4              | NR                              | NR                       | NR           |
|                                      | Intensive intervention                          | 25         | 25                                          | 68          | 46   | 31, 68 <sup>c</sup> | 32.5 | 5.2              | NR                              | NR                       | NR           |
| Dalziel 2006                         | Control                                         | 303        | 303                                         | 7.9         | 53.5 | 10                  | 25.8 | 3.4              | 100                             | NR                       | NR           |
|                                      | Experimental                                    | 302        | 302                                         | 10.6        | 53.5 | 10                  | 25.8 | 3.4              | 100                             | NR                       | NR           |
| Damschroder 2014                     | Control, MOVE - usual care                      | 159        | 159                                         | 12.6        | 54.6 | 10.5                | 36.8 | 6.4              | NR                              | 37.7                     | 65.4         |
|                                      | ASPIRE group, individual telephone counselling  | 162        | 162                                         | 16          | 55.4 | 10.0                | 36.3 | 6.2              | NR                              | 32.7                     | 67.9         |
|                                      | ASPIRE group, group counselling                 | 160        | 160                                         | 16.2        | 54.9 | 9.5                 | 36.2 | 6.1              | NR                              | 40.0                     | 65.6         |
| Daubenmier 2016                      | Active control intervention                     | 94         | 94                                          | 86          | 47.8 | 12.4                | 35.6 | 3.8              | NR                              | NR                       | 22.3         |
|                                      | Mindfulness Intervention                        | 100        | 100                                         | 79          | 47.2 | 13.0                | 35.4 | 3.5              | NR                              | NR                       | 16           |
| Daumit 2013                          | Control, Usual care                             | 147        | 147                                         | 49          | 44.1 | 11.0                | 36.5 | 7.3              | NR                              | NR                       | NR           |
|                                      | ACHIEVE                                         | 144        | 144                                         | 51.4        | 46.6 | 11.5                | 36   | 7.2              | NR                              | NR                       | NR           |
| de Zwaan 2017                        | Internet-based guided self-help treatment       | 89         | 83                                          | 89.2        | 43.7 | 12.7                | 33.4 | 3.9              | NR                              | 8.4 <sup>#</sup>         | 19.3         |
|                                      | Cognitive Behavioural Therapy                   | 89         | 86                                          | 86          | 42.7 | 12.0                | 34.4 | 3.9              | NR                              | 3.5 <sup>#</sup>         | 26.7         |
| Delahanty 2015                       | Dietitian Referral group                        | 29         | 29                                          | 41          | 61   | 11.4                | 33.8 | 5.0              | 27.6                            | 100                      | 82.6         |
|                                      | Group lifestyle intervention                    | 28         | 28                                          | 39          | 62   | 9.6                 | 36.3 | 12.4             | 25.0                            | 100                      | 71.4         |
| deRoos 2017                          | Control                                         | 48         | 48                                          | 100         | 60   | 4.9                 | 29.5 | 2.6              | NR                              | NR                       | NR           |
|                                      | Diet                                            | 97         | 97                                          | 100         | 61   | 4.6                 | 29.5 | 2.6              | NR                              | NR                       | NR           |
|                                      | Exercise                                        | 98         | 98                                          | 100         | 59   | 4.9                 | 29   | 2.9              | NR                              | NR                       | NR           |
| deVos 2016                           | Control                                         | 204        | 204                                         | 100         | 55.7 | 3.2                 | 32.5 | 4.5              | NR                              | NR                       | 74.5         |
|                                      | Tailor-made lifestyle intervention              | 203        | 203                                         | 100         | 55.7 | 3.2                 | 32.2 | 4.1              | NR                              | NR                       | 68.5         |
| DeZwaan 2005                         | BED                                             | 35         | 35                                          | 100         | 37.7 | 6.5                 | 35.7 | 4.2              | NR                              | NR                       | NR           |
|                                      | BED plus CBT                                    | 36         | 36                                          | 100         | 40.9 | 7.7                 | 36.6 | 3.2              | NR                              | NR                       | NR           |
| Diabetes Prevention Program R G 2009 | Placebo                                         | 1082       | 1082                                        | 69          | 50.3 | 10.4                | 32.2 | 6.7              | NR                              | All at high risk of T2DM | 30.0         |
|                                      | Metformin (N/A)                                 | 1073       | 1073                                        | N/A         | N/A  | N/A                 | N/A  | N/A              | N/A                             |                          |              |
|                                      | Lifestyle                                       | 1079       | 1079                                        | 68          | 50.6 | 11.3                | 33.9 | 6.8              | NR                              |                          |              |
| Djuric 2002                          | Control                                         | 13         | 48                                          | 100         | 51.7 | 8.4                 | 34.9 | 1.2 <sup>b</sup> | NR                              | 6.3                      | NR           |
|                                      | Weight Watchers                                 | 11         |                                             | 100         |      |                     | 35   | 1.2 <sup>b</sup> | NR                              |                          | NR           |
|                                      | Individualized group                            | 13         |                                             | 100         |      |                     | 35.5 | 1.1 <sup>b</sup> | NR                              |                          | NR           |
|                                      | Comprehensive group                             | 11         |                                             | 100         |      |                     | 36.8 | 1 <sup>b</sup>   | NR                              |                          | NR           |
| Donnelly 2013                        | Phone Group                                     | 201        | 201                                         | 66          | 43.2 | 10.2                | 34.6 | 4.7              | 5.0                             | 9.0                      | 27.9         |
|                                      | Face-to-Face Group                              | 194        | 194                                         | 68.0        | 44.5 | 9.9                 | 34.9 | 4.6              | 5.2                             | 7.2                      | 25.3         |
| Duncan 2016                          | Control                                         | 162        | 159                                         | 42.8        | 54.8 | 8.48                | 31.8 | 6.91             | NR                              | NR                       | NR           |
|                                      | Intervention                                    | 158        | 154                                         | 45.1        | 53.1 | 9.83                | 33.8 | 7.14             | NR                              | NR                       | NR           |
| Eakin 2014                           | Usual care                                      | 151        | 151                                         | 43.0        | 58.3 | 9.0                 | 33.2 | 6.0              | 74.8                            | 100                      | NR           |
|                                      | Telephone intervention                          | 151        | 151                                         | 44.4        | 57.7 | 8.1                 | 33.1 | 6.3              | 84.1                            | 100                      | NR           |
| Eaton 2016                           | Control, Standard Intervention                  | 106        | 106                                         | 83          | 48.6 | 11.2                | 37.8 | 6.7              | NR                              | NR                       | NR           |
|                                      | Enhanced Intervention                           | 105        | 105                                         | 75.2        | 48.5 | 11.9                | 37.7 | 6.5              | NR                              | NR                       | NR           |

| Study ID             | Groups:                                           | Randomised | Number of participants reported at baseline | Gender (%F) | Age  |      | BMI  |     | Comorbidities at baseline (%) * |            |              |
|----------------------|---------------------------------------------------|------------|---------------------------------------------|-------------|------|------|------|-----|---------------------------------|------------|--------------|
|                      |                                                   |            |                                             |             | Mean | SD   | Mean | SD  | CV morbidity                    | Type II DM | Hypertension |
| Fahey 2018           | Self-paced condition                              | 124        | 124                                         | 50.8        | 33.8 | 6.8  | NR   | NR  | NR                              | NR         | NR           |
|                      | Counselor- initiated condition                    | 124        | 124                                         | 50.8        | 35.3 | 8.2  | NR   | NR  | NR                              | NR         | NR           |
| Fernandez-Ruiz 2018  | Control                                           | 37         | 37                                          | 51.4        | 62.8 | 8.9  | 34.3 | 4.5 | NR                              | 62.2       | 86.5         |
|                      | Intervention (healthy eating, exercise & CBT)     | 37         | 37                                          | 48.6        | 59.4 | 9.1  | 32.4 | 3.8 | NR                              | 43.2       | 78.4         |
| Finkelstein 2017     | Control                                           | 54         | 54                                          | 55.6        | 45   | 10.2 | 29.5 | 3.5 | NR                              | NR         | NR           |
|                      | Financial Reward                                  | 107        | 107                                         | 55.7        | 43.4 | 9.8  | 29.8 | 3.1 | NR                              | NR         | NR           |
| Fisher 2011          | Diet only                                         | 29         | NR                                          | 100         | NR   | NR   | 28   | 3   | NR                              | NR         | NR           |
|                      | Diet + aerobic training                           | 43         | NR                                          |             | NR   | NR   |      |     | NR                              | NR         |              |
|                      | Diet + resistance training                        | 54         | NR                                          |             | NR   | NR   |      |     | NR                              | NR         |              |
| Foley 2016           | Usual care (Control)                              | 175        | 175                                         | 68          | 50.5 | 8.7  | 35.9 | 3.7 | NR                              | 3.4        | 29.1         |
|                      | Weight loss intervention                          | 176        | 176                                         | 68          | 50.9 | 9.1  | 35.9 | 4.1 | NR                              | 3.4        | 29.5         |
| Foreyt 1993          | Control (N/A)                                     | 38         | 38                                          | 48          | NR   | NR   | NR   | NR  | N/A                             | N/A        | N/A          |
|                      | Exercise only                                     | 43         | 43                                          |             |      |      |      |     | NR                              | NR         | NR           |
|                      | Diet only                                         | 42         | 42                                          |             |      |      |      |     | NR                              | NR         | NR           |
|                      | Exercise plus diet                                | 42         | 42                                          |             |      |      |      |     | NR                              | NR         | NR           |
| Forman 2013          | Standard Behavioural Treatment                    | 54         | 54                                          | NR          | 45.0 | 12.8 | 33.6 | 3.7 | NR                              | NR         | NR           |
|                      | Acceptance-Based Behavioural Treatment            | 74         | 74                                          | NR          | 46.2 | 12.9 | 34.4 | 3.6 | NR                              | NR         | NR           |
| Forman 2016          | Standard Behavioural Treatment                    | 90         | 90                                          | 82.1        | 51.6 | 10.2 | 37.4 | 6.2 | NR                              | NR         | NR           |
|                      | Acceptance-Based Treatment                        | 100        | 100                                         |             | 51.6 | 10.0 | 36.5 | 5.4 | NR                              | NR         | NR           |
| Foster-Schubert 2012 | Control- usual care                               | 87         | 87                                          | 100         | 57.4 | 4.4  | 30.7 | 3.9 | NR                              | NR         | NR           |
|                      | Calorie reduced diet                              | 118        | 118                                         | 100         | 58.1 | 5.9  | 31   | 3.9 | NR                              | NR         | NR           |
|                      | Aerobic exercise (N/A)                            | 117        | 117                                         | N/A         | N/A  | N/A  | N/A  | N/A | N/A                             | N/A        | N/A          |
|                      | Intervention - diet and exercise                  | 117        | 117                                         | 100         | 58.0 | 4.5  | 31   | 4.3 | NR                              | NR         | NR           |
| Freitas 2017         | Weight loss program + Sham                        | 27         | 25                                          | 100         | 48.5 | 9.6  | 37.2 | 2.1 | NR                              | NR         | 48.0         |
|                      | Weight loss program + Exercise                    | 28         | 26                                          | 96          | 45.9 | 7.7  | 38.1 | 2.8 | NR                              | NR         | 38.5         |
| Fuller 2012          | Western diet group                                | 35         | 35                                          | 54.3        | 47.1 | 11.1 | 31.0 | 3.8 | NR                              | NR         | NR           |
|                      | Korean diet group                                 | 35         | 35                                          | 71.4        | 43.7 | 11   | 31.2 | 4.0 | NR                              | NR         | NR           |
| Gold 2007            | Commercial programme eDiets                       | 62         | 62                                          | 86          | 48.9 | 9.9  | 32.5 | 4.2 | NR                              | NR         | NR           |
|                      | Structured VTrim                                  | 62         | 62                                          | 77          | 46.5 | 10.7 | 32.3 | 3.9 | NR                              | NR         | NR           |
| Goodwin 2014         | Mailed-based intervention                         | 167        | 167                                         | 100         | 60.4 | 7.8  | 31.1 | 5.3 | NR                              | 0.0        | NR           |
|                      | Individual lifestyle intervention                 | 171        | 171                                         | 100         | 61.6 | 6.7  | 31.4 | 5.0 | NR                              | 0.0        | NR           |
| Gorin 2013           | Standard Behavioural Weight loss                  | 99         | 99                                          | 78.8        | 50.4 | 9.3  | 36.1 | 6.1 | NR                              | NR         | NR           |
|                      | Enhanced home environment behavioural weight loss | 102        | 102                                         | 77.5        | 47.5 | 11.3 | 36.7 | 6.2 | NR                              | NR         | NR           |
| Gorin 2015           | Usual care                                        | 96         | 96                                          | 71.9        | 48.3 | 9.7  | 38.2 | 7.3 | NR                              | 16.7       | 30.2         |
|                      | STRIDE                                            | 104        | 104                                         | 72.1        | 46.2 | 11.4 | 38.3 | 9.1 | NR                              | 13.5       | 28.8         |
| Grilo 2011           | Cognitive Behavioral Therapy (CBT)                | 45         | 45                                          | 64.4        | 45.2 | 8.5  | 39.3 | 6.1 | NR                              | NR         | NR           |
|                      | Behavioral weight loss (BWL)                      | 45         | 45                                          | 62.2        | 44.6 | 10.5 | 38   | 5.3 | NR                              | NR         | NR           |
|                      | CBT + BWL (N/A)                                   | 35         | NR                                          |             |      |      |      |     | N/A                             | N/A        | N/A          |
| Grilo 2014           | Placebo                                           | 27         | 27                                          | 66.7        | 43.2 | 12.4 | 39.3 | 5.5 | NR                              | NR         | NR           |
|                      | Placebo/CBTsh                                     | 25         | 25                                          | 80          | 45.7 | 12.4 | 36.5 | 5.3 | NR                              | NR         | NR           |
|                      | Sibutramine (N/A)                                 | 26         | NR                                          | N/A         | N/A  | N/A  | N/A  | N/A | N/A                             | N/A        | N/A          |

| Study ID        | Groups:                                           | Randomised | Number of participants reported at baseline | Gender (%F) | Age   |                         | BMI             |                         | Comorbidities at baseline (%) * |            |              |
|-----------------|---------------------------------------------------|------------|---------------------------------------------|-------------|-------|-------------------------|-----------------|-------------------------|---------------------------------|------------|--------------|
|                 |                                                   |            |                                             |             | Mean  | SD                      | Mean            | SD                      | CV morbidity                    | Type II DM | Hypertension |
| Hageman 2017    | Sibutramine/CBTsh (N/A)                           | 26         | NR                                          | N/A         | N/A   | N/A                     | N/A             | N/A                     | N/A                             | N/A        | N/A          |
|                 | Web-based only                                    | 101        | 101                                         | 100         | 53.9  | 6.9                     | NR              | NR                      | 3.0                             | 3.0        | NR           |
|                 | Web-based discussion                              | 100        | 100                                         |             |       |                         | NR              | NR                      | 1.0                             | 5.0        | NR           |
|                 | Web-based email                                   | 100        | 100                                         |             |       |                         | NR              | NR                      | 4.0                             | 6.0        | NR           |
| Hakala 1993     | Individual community-based counselling            | 28         | 28                                          | 7.4         | 38.1  | NR                      | 42.8            | 4.5                     | NR                              | NR         | NR           |
|                 | Group in-patient rehabilitation                   | 30         | 30                                          | 8.1         | 40.3  | NR                      | 43.3            | 4.8                     | NR                              | NR         | NR           |
| Hanson 1976     | No treatment control condition (N/A)              | 10         | 66                                          | 87.9        | 40    | NR                      | NR              | NR                      | NR                              | NR         | NR           |
|                 | Attention-placebo control condition               | 11         |                                             |             |       |                         |                 |                         |                                 |            |              |
|                 | Conventional self-management condition            | 7          |                                             |             |       |                         |                 |                         |                                 |            |              |
|                 | Programmed text with low therapist-group contact  | 12         |                                             |             |       |                         |                 |                         |                                 |            |              |
|                 | Programmed text with high therapist-group contact | 13         |                                             |             |       |                         |                 |                         |                                 |            |              |
| Hardcastle 2013 | Control                                           | 131        | 131                                         |             | 50.41 | 10.87                   | 33.37           | 4.47                    | NR                              | NR         | 18.3         |
|                 | MI counselling intervention                       | 203        | 203                                         |             | 50.1  | 10.54                   | 33.66           | 5.12                    | NR                              | NR         | 22.7         |
| Harrigan 2016   | Usual Care Group                                  | 33         | 33                                          | 100         | 58    | 7.5                     | 34              | 7.5                     | NR                              | NR         | NR           |
|                 | Telephone Weight Loss Counseling                  | 34         | 34                                          | 100         | 60    | 7.7                     | 31.8            | 5.4                     | NR                              | NR         | NR           |
|                 | In-Person Weight Loss Counseling                  | 33         | 33                                          | 100         | 58.9  | 7.3                     | 33.5            | 6.7                     | NR                              | NR         | NR           |
| Harris 2017     | Waist Winners Too                                 | 24         | 24                                          | 58.3        | 43.6  | 14.0                    | 41.2            | 8.1                     | NR                              | 12.5       | 45.8         |
|                 | TAKE 5                                            | 26         | 26                                          | 69.2        | 40.6  | 15.0                    | 40.2            | 6.8                     | NR                              | 3.8        | 46.2         |
| Hunt 2014       | Control, Wait-list                                | 373        | 373                                         | 0           | 47.2  | 7.89                    | 35.1            | 4.8                     | NR                              | NR         | NR           |
|                 | FFIT                                              | 374        | 374                                         | 0           | 47    | 8.07                    | 35.5            | 5.1                     | NR                              | NR         | NR           |
| Huseinovic 2016 | Control Group                                     | 56         | 56                                          | 100         | 32.6  | 4.7                     | 31 <sup>a</sup> | 26.3–48.7 <sup>c</sup>  | NR                              | NR         | NR           |
|                 | Diet behaviour modification Group                 | 54         | 54                                          | 100         | 31.8  | 4.5                     |                 |                         | NR                              | NR         | NR           |
| Irwin 2003      | Control Group                                     | 86         | 86                                          | 100         | 60.6  | 59.1, 62.1 <sup>d</sup> | 30.6            | 29.8, 31.4 <sup>d</sup> | NR                              | NR         | NR           |
|                 | Exercise group                                    | 87         | 87                                          |             | 61    | 59.6, 62.5 <sup>d</sup> | 30.5            | 29.6, 31.4 <sup>d</sup> | NR                              | NR         | NR           |
| Jackson 1982    | Control                                           | 6          | 6                                           | 100         | 23.5  | 16-34 <sup>c</sup>      | NR              | NR                      | NR                              | NR         | NR           |
|                 | Treatment                                         | 6          | 6                                           | 100         | 21.8  | 16-34 <sup>c</sup>      | NR              | NR                      | NR                              | NR         | NR           |
| Jackson 2018    | Brief strategic therapy                           | 30         | 30                                          | 100         | 45.9  | 10.8                    | 39.6            | 2.6                     | NR                              | NR         | NR           |
|                 | Cognitive-behavioral therapy                      | 30         | 30                                          | 100         | 46.2  | 10.5                    |                 |                         | NR                              | NR         | NR           |
| Jakicic 2011    | Self Help Group                                   | 89         | 89                                          | 92          | 44.7  | 7.9                     | 27.1            | 1.7                     | NR                              | NR         | NR           |
|                 | Moderate Physical Activity                        | 82         | 82                                          | 90          | 43.5  | 8.8                     | 27.1            | 1.7                     | NR                              | NR         | NR           |
|                 | High Physical Activity                            | 98         | 98                                          | 92          | 45    | 8.4                     | 27              | 1.6                     | NR                              | NR         | NR           |
| Jakicic 2015    | Standard behavior weight loss interventions group | 71         | 69                                          | 79.7        | 43.0  | 9.3                     | 32.7            | 3.7                     | NR                              | NR         | NR           |
|                 | ADOPT group                                       | 71         | 64                                          | 76.6        | 43.3  | 8.6                     | 33.3            | 2.9                     | NR                              | NR         | NR           |
|                 | MAINTAIN Group (N/A)                              | 71         | N/A                                         | N/A         | N/A   | N/A                     | N/A             | N/A                     | N/A                             | N/A        | N/A          |
| Jebb 2011       | Standard care                                     | 395        | 395                                         | 86          | 48.2  | 12.2                    | 31.3            | 2.6                     | NR                              | 6.8        | 25.1         |
|                 | Commercial programme                              | 377        | 377                                         | 88          | 46.5  | 13.5                    | 31.5            | 2.6                     | NR                              | 6.4        | 25.5         |
| Jebb 2017       | Usual care                                        | 140        | 140                                         | 60.0        | 47.4  | 12.8                    | 36.8            | 5.1                     | NR                              | 14.3       | 21.4         |
|                 | Low energy total diet replacement programme       | 138        | 138                                         | 60.5        | 48.2  | 11.5                    | 37.6            | 5.7                     | NR                              | 15.2       | 23.9         |



| Study ID     | Groups:                                          | Randomised | Number of participants reported at baseline | Gender (%F) | Age   |              | BMI  |              | Comorbidities at baseline (%) * |                   |              |
|--------------|--------------------------------------------------|------------|---------------------------------------------|-------------|-------|--------------|------|--------------|---------------------------------|-------------------|--------------|
|              |                                                  |            |                                             |             | Mean  | SD           | Mean | SD           | CV morbidity                    | Type II DM        | Hypertension |
| Jeffery 1995 | Control group                                    | 40         | 40                                          | 50          | 35.7  | NR           | 31.1 | NR           | NR                              | NR                | NR           |
|              | Standard Behavioural Therapy (SBT)               | 40         | 40                                          |             | 37.5  | NR           | 30.9 | NR           | NR                              | NR                | NR           |
|              | SBT + Incentives (I)                             | 41         | 41                                          |             | 38.1  | NR           | 31.1 | NR           | NR                              | NR                | NR           |
|              | SBT + Food Provision (FP)                        | 40         | 40                                          |             | 38.5  | NR           | 30.8 | NR           | NR                              | NR                | NR           |
|              | SBT + FP + I                                     | 41         | 41                                          |             | 37.6  | NR           | 31.1 | NR           | NR                              | NR                | NR           |
| Jeffery 2003 | Standard behaviour therapy                       | 93         | 202                                         | 58          | 42.2  | 6.4          | 31.7 | 2.6          | NR                              | NR                | NR           |
|              | High physical activity                           | 109        |                                             |             |       |              |      |              | NR                              | NR                | NR           |
| Jenkins 2017 | Control                                          | 486        | 486                                         | 79.4        | 44.9  | 43.8, 46.0 d | 32.5 | 32.0, 33.0 d | 5.8                             | NR                | 8.6          |
|              | Dietary advice only                              | 145        | 145                                         | 75.9        | 46.2  | 44.0, 48.4 d | 31.7 | 30.8, 32.7 d | 7.6                             | NR                | 9.0          |
|              | Food basket only                                 | 148        | 148                                         | 72.3        | 44.9  | 43.1, 46.7 d | 32.6 | 31.6, 33.5 d | 7.4                             | NR                | 10.1         |
|              | Food and advice                                  | 140        | 140                                         | 76.4        | 42.4  | 40.4, 44.4 d | 32.7 | 31.7, 33.7 d | 5.0                             | NR                | 5.7          |
| John 2011    | Control                                          | 22         | 22                                          | 18.2        | NR    | NR           | 34.7 | 3.2          | 9.1                             | 4.4 <sup>#</sup>  | 68.2         |
|              | Deposit contracts group                          | 44         | 44                                          | 15.9        | NR    | NR           | 34.6 | 2.4          | 18.2                            | 15.9 <sup>#</sup> | 59.1         |
| Jolly 2011   | Minimal intervention comparator                  | 100        | 100                                         | 75          | 49.67 | 13.83        | 33.9 | 4.4          | NR                              | NR                | NR           |
|              | Choice (N/A)                                     | 100        | N/A                                         | N/A         | N/A   | N/A          | N/A  | N/A          | N/A                             | N/A               | N/A          |
|              | Pharmacy                                         | 70         | 70                                          | 73          | 48.9  | 15.8         | 33.4 | 3.5          | NR                              | NR                | NR           |
|              | General practice                                 | 70         | 70                                          | 67          | 50.5  | 13.8         | 33.1 | 3.5          | NR                              | NR                | NR           |
|              | Weight Watchers                                  | 100        | 100                                         | 72          | 50.7  | 14.6         | 34.0 | 3.9          | NR                              | NR                | NR           |
|              | NHS Size Down                                    | 100        | 100                                         | 64          | 48.8  | 15.6         | 33.8 | 3.9          | NR                              | NR                | NR           |
|              | Rosemary Conley                                  | 100        | 100                                         | 69          | 49.8  | 49.8         | 33.4 | 3.5          | NR                              | NR                | NR           |
|              | Slimming world                                   | 100        | 100                                         | 65          | 48.8  | 14.9         | 33.8 | 3.8          | NR                              | NR                | NR           |
| Jones 1986   | Individual                                       | 21         | 160                                         | 100         | 50.3  | 13.5         | 35.1 | 9.2          | NR                              | 0.0               | NR           |
|              | Group                                            | 17         |                                             |             |       |              |      |              | NR                              |                   | NR           |
|              | Leaflet Individual                               | 22         |                                             |             |       |              |      |              | NR                              |                   | NR           |
|              | Leaflet Group                                    | 20         |                                             |             |       |              |      |              | NR                              |                   | NR           |
|              | Diary Individual                                 | 20         |                                             |             |       |              |      |              | NR                              |                   | NR           |
|              | Diary Group                                      | 19         |                                             |             |       |              |      |              | NR                              |                   | NR           |
|              | Leaflet Diary Individual                         | 21         |                                             |             |       |              |      |              | NR                              |                   | NR           |
|              | Leaflet Diary Group                              | 20         |                                             |             |       |              |      |              | NR                              |                   | NR           |
| Jones 1999   | Control Group                                    | NS         | 51                                          | 49.0        | 59    | 7            | 34   | 6            | NR                              | NR                | 100          |
|              | Weight Loss Group                                | NS         | 51                                          | 54.9        | 57    | 6            | 34   | 6            | NR                              | NR                | 100          |
| Katula 2013  | Enhanced Usual Care Comparison Condition         | 150        | 150                                         | 57.3        | 58.5  | 9.0          | 32.6 | 4.1          | NR                              | 0.0               | 52.0         |
|              | Lifestyle Weight-Loss Intervention               | 151        | 151                                         | 57.6        | 57.3  | 10.1         | 32.8 | 3.9          | NR                              | 0.0               | 51.7         |
| Katzner 2008 | Mail-delivered 'non-dieting' program (P3)        | 101        | 225                                         | 100         | 46.1  | 8.9          | 35.4 | 5.7          | NR                              | NR                | NR           |
|              | Group 'non-dieting' program (P2)                 | 62         |                                             |             |       |              |      |              | NR                              | NR                | NR           |
|              | Group 'non-dieting' program plus Relaxation (P1) | 62         |                                             |             |       |              |      |              | NR                              | NR                | NR           |
| Keogh 2014   | Intermittent dieting                             | 39         | 19                                          | 100         | 59.5  | 8.7          | 33.1 | 3.8          | NR                              | 1                 | NR           |
|              | Continuous dieting                               | 36         | 17                                          | 100         | 60.8  | 12.5         | 33.0 | 7.5          | NR                              |                   | NR           |

| Study ID       | Groups:                                                                        | Randomised | Number of participants reported at baseline | Gender (%F) | Age  |                   | BMI  |                  | Comorbidities at baseline (%) * |                   |              |
|----------------|--------------------------------------------------------------------------------|------------|---------------------------------------------|-------------|------|-------------------|------|------------------|---------------------------------|-------------------|--------------|
|                |                                                                                |            |                                             |             | Mean | SD                | Mean | SD               | CV morbidity                    | Type II DM        | Hypertension |
| Keranen 2009   | Short-term counselling                                                         | 47         | 47                                          | 70          | 49   | 9                 | 35   | 5                | NR                              | NR                | NR           |
|                | Intensive counselling                                                          | 35         | 35                                          | 74          | 50   | 8                 | 35   | 5                | NR                              | NR                | NR           |
| King 1989      | Control (N/A)                                                                  | 52         | N/A                                         | N/A         | N/A  | N/A               | N/A  | N/A              | N/A                             | N/A               | N/A          |
|                | Exercise only                                                                  | 52         | 36                                          | 0           | 44.8 | 7.4               | NR   | NR               | NR                              | NR                | NR           |
|                | Diet only                                                                      | 51         | 36                                          | 0           | 45   | 7.6               | NR   | NR               | NR                              | NR                | NR           |
| Kingsley 1977  | Social Pressure                                                                | 11         | 78                                          | 100         | 41.5 | NR                | NR   | NR               | NR                              | NR                | NR           |
|                | Group Behavioural                                                              | 13         |                                             |             |      |                   | NR   | NR               | NR                              | NR                | NR           |
|                | Individual Behavioural                                                         | 12         |                                             |             |      |                   | NR   | NR               | NR                              | NR                | NR           |
|                | Social Pressure – Booster                                                      | 11         |                                             |             |      |                   | NR   | NR               | NR                              | NR                | NR           |
|                | Group Behavioural – Booster                                                    | 13         |                                             |             |      |                   | NR   | NR               | NR                              | NR                | NR           |
|                | Individual Behaviour – Booster                                                 | 12         |                                             |             |      |                   | NR   | NR               | NR                              | NR                | NR           |
| Knauper 2018   | Standard DPP                                                                   | 101        | 85                                          | 76.5        | 49.4 | 11.8              | NR   | NR               | NR                              | NR                | NR           |
|                | Enhanced DPP                                                                   | 107        | 87                                          | 83.9        | 50.9 | 12.1              | NR   | NR               | NR                              | NR                | NR           |
| Kuller 2012    | Control - health education                                                     | 255        | 255                                         | 100         | 57   | NR                | 30.9 | 3.8              | NR                              | NR                | NR           |
|                | Intervention - lifestyle change                                                | 253        | 253                                         | 100         | 56   | NR                | 30.6 | 3.8              | NR                              | NR                | NR           |
| Kumanyika 2012 | Basic programme                                                                | 137        | 137                                         | 82.5        | 46.8 | 11.6              | 37.3 | 6.4              | 10.9                            | 19.7 <sup>#</sup> | 41.6         |
|                | Basic plus programme                                                           | 124        | 124                                         | 86.3        | 47.6 | 11.9              | 37.2 | 6.5              | 6.5                             | 16.9 <sup>#</sup> | 46.0         |
| Leahey 2014    | SURI alone                                                                     | 46         | 46                                          | 82.6        | 46.5 | 1.7 <sup>b</sup>  | 35.1 | 1.3 <sup>b</sup> | NR                              | NR                | NR           |
|                | SURI plus Internet behavioral weight loss program                              | 90         | 90                                          | 82.2        | 46.2 | 1.2 <sup>b</sup>  | 34.7 | 0.7 <sup>b</sup> | NR                              | NR                | NR           |
|                | SURI plus Internet behavioral weight loss program plus optional group sessions | 94         | 94                                          | 86.2        | 47.7 | 1.1 <sup>b</sup>  | 33.4 | 0.7 <sup>b</sup> | NR                              | NR                | NR           |
| Leahey 2015    | SURII Internet behavioral weight loss                                          | 91         | 91                                          | 83.5        | 45.1 | 11.0              | 32.9 | 5.5              | NR                              | NR                | NR           |
|                | SURII Internet behavioral weight loss incentives                               | 89         | 89                                          | 79.8        | 46.3 | 9.4               | 33.5 | 6.5              | NR                              | NR                | NR           |
|                | SURII Internet behavioral weight loss 1 group option                           | 88         | 88                                          | 84.1        | 47.4 | 11.4              | 34.3 | 6.8              | NR                              | NR                | NR           |
| Lejeune 2003   | Diet                                                                           | 20         | 37                                          | 0           | 39   | 7.1               | 32.3 | 2.3              | NR                              | NR                | NR           |
|                | Diet plus exercise                                                             | 20         |                                             |             |      |                   |      |                  | NR                              | NR                | NR           |
| Ley 2004       | Control diet                                                                   | 70         | 70                                          | 20          | 52   | 0.8 <sup>b</sup>  | 29.1 | 0.6 <sup>b</sup> | NR                              | NR                | NR           |
|                | Reduced-fat                                                                    | 66         | 66                                          | 31.8        | 52.5 | 0.8 <sup>b</sup>  | 29.3 | 0.6 <sup>b</sup> | NR                              | NR                | NR           |
| Li 2016        | Usual care group                                                               | 60         | 60                                          | 35          | 59   | 3.9               | 25.2 | 0.9              | NR                              | 100               | NR           |
|                | Diet group                                                                     | 79         | 79                                          | 46.8        | 59.7 | 6.5               | 27.2 | 2.8              | NR                              | 100               | NR           |
|                | 50g-oats group                                                                 | 80         | 80                                          | 48.8        | 59.7 | 6.1               | 26.9 | 2.7              | NR                              | 100               | NR           |
|                | 100g-oats group                                                                | 79         | 79                                          | 58.2        | 59.4 | 6.8               | 27.4 | 2.4              | NR                              | 100               | NR           |
| Li 2005        | Individualized diet plan                                                       | 52         | 36                                          | 33.3        | 56.6 | 10.4 <sup>b</sup> | 33.7 | 3.6 <sup>b</sup> | NR                              | 100               | NR           |
|                | Soy-based meal replacement                                                     | 52         | 46                                          | 41.3        | 54.4 | 9.3 <sup>b</sup>  | 32.8 | 3.7 <sup>b</sup> | NR                              | 100               | NR           |
| Lindstrom 2003 | Control                                                                        | 257        | 257                                         | 68.5        | 55   | 7                 | 31.4 | 4.5              | NR                              | NR                | 31.1         |
|                | Intervention                                                                   | 265        | 265                                         | 65.7        | 55   | 7                 | 31.1 | 4.5              | NR                              | NR                | 29.1         |
| Liss 2016      | Standard care arm                                                              | 167        | 167                                         | 48.5        | 56.6 | 12.2              | 34.9 | 7.3              | NR                              | 100               | 76.6         |
|                | Standard care plus group-based lifestyle intervention                          | 164        | 164                                         | 51.8        | 57.1 | 10.6              | 36.2 | 7.8              | NR                              | 100               | 80.5         |
| Little 2016    | Control, Nurse follow-up                                                       | 279        | 279                                         | 66          | 52.7 | 13.3              | 37.1 | 6.0              | NR                              | NR                | NR           |

| Study ID      | Groups:                                                | Randomised | Number of participants reported at baseline | Gender (%F) | Age   |                    | BMI  |                        | Comorbidities at baseline (%) * |                   |              |    |
|---------------|--------------------------------------------------------|------------|---------------------------------------------|-------------|-------|--------------------|------|------------------------|---------------------------------|-------------------|--------------|----|
|               |                                                        |            |                                             |             | Mean  | SD                 | Mean | SD                     | CV morbidity                    | Type II DM        | Hypertension |    |
|               | Web-based support with minimal support (Remote)        | 270        | 270                                         | 60          | 54.7  | 13.0               | 36.3 | 5.7                    | NR                              | NR                | NR           |    |
|               | Web-based + nurse support (face to face)               | 269        | 269                                         | 65          | 53.7  | 13.2               | 36.7 | 5.4                    | NR                              | NR                | NR           |    |
| Long 1983     | Individual Dietetic Counselling Group                  | 12         | 36                                          | 100         | 36.8  | 18-56 <sup>c</sup> | 33.5 | 28.9-49.4 <sup>c</sup> | NR                              | NR                | NR           |    |
|               | Group Dietetic Counselling Group                       | 12         |                                             |             |       |                    |      |                        | NR                              | NR                | NR           |    |
|               | Group Dietetic Counselling and behaviour therapy Group | 12         |                                             |             |       |                    |      |                        | NR                              | NR                | NR           |    |
| Lowe 2018     | Behavior therapy                                       | 90         | 90                                          | 83          | 47.7  | 12.57              | NR   | NR                     | NR                              | NR                | NR           |    |
|               | Behavior therapy plus meal replacements                | 91         | 91                                          | 85          | 50.38 | 9.39               | NR   | NR                     | NR                              | NR                | NR           |    |
|               | Home food environment                                  | 81         | 81                                          | 73          | 51.5  | 9.42               | NR   | NR                     | NR                              | NR                | NR           |    |
| Ma 2015       | Control, Enhanced usual care                           | 165        | 165                                         | 70.9        | 47.7  | 12.1               | 37.6 | 5.7                    | NR                              | NR                | NR           |    |
|               | Diet and counselling                                   | 165        | 165                                         | 70.3        | 47.5  | 12.6               | 37.4 | 6.0                    | NR                              | NR                | NR           |    |
| Manning 1994  | Clinic visit                                           | 37         | 37                                          | 56.8        | 57.3  | 54.1, 60.5         | 31.2 | 30.1, 32.3             | NR                              | NR                | NR           |    |
|               | Behavioural                                            | 38         | 38                                          | 47.4        | 58.8  | 55.9, 61.7         | 32.2 | 30.5, 33.9             | NR                              | NR                | NR           |    |
|               | Home visits                                            | 35         | 35                                          | 42.7        | 55.2  | 51.6, 58.8         | 32   | 30.9, 33.1             | NR                              | NR                | NR           |    |
|               | Dexfenfluramine (N/A)                                  | N/A        | N/A                                         | N/A         | N/A   | N/A                | N/A  | N/A                    | N/A                             | N/A               | N/A          |    |
|               | Routine usual care (N/A)                               | N/A        | N/A                                         | N/A         | N/A   | N/A                | N/A  | N/A                    | N/A                             | N/A               | N/A          |    |
| Manzoni 2016  | Control, Standard behavioral inpatient program         | 52         | 158                                         | 100         | 35.6  | 8.04               | 42.2 | 6.01                   | NR                              | NR                | NR           |    |
|               | Cognitive-behavioral therapy                           | 54         |                                             |             |       |                    |      |                        | NR                              | NR                | NR           |    |
|               | CBT + Virtual reality                                  | 57         |                                             |             |       |                    |      |                        | NR                              | NR                | NR           |    |
| Marniemi 1990 | Control group                                          | 42         | 42                                          | 76.2        | 38.0  | NR                 | 33.6 | NR                     | NR                              | NR                | NR           |    |
|               | Lactovegetarian weight reduction group                 | 31         | 31                                          | 74.2        |       |                    | 34.4 | NR                     | NR                              | NR                | NR           | NR |
|               | Mixed diet weight reduction                            | 37         | 37                                          | 73.0        |       |                    | NR   | NR                     | NR                              | NR                | NR           | NR |
| Martin 2008   | Control, Standard Care                                 | 69         | 69                                          | 100         | 42.6  | 11.4               | 39.8 | 7.8                    | NR                              | NR                | NR           |    |
|               | Tailored physician/lifestyle counselling               | 68         | 68                                          | 100         | 40.8  | 12.7               | 38.3 | 7.5                    | NR                              | NR                | NR           |    |
| Mefferd 2007  | Control                                                | 29         | 29                                          | 100         | 56.4  | 7.5                | 31.3 | 4.8                    | NR                              | NR                | NR           |    |
|               | Intervention                                           | 56         | 56                                          | 100         | 55.9  | 8.7                | 31   | 3.7                    | NR                              | NR                | NR           |    |
| Melchart 2017 | Control group                                          | 57         | 55                                          | 72.7        | 52.1  | 10                 | 31.5 | 2                      | NR                              | 0.0               | NR           |    |
|               | Intervention group                                     | 109        | 111                                         | 74.8        | 49.9  | 9.7                | 31.8 | 2                      | NR                              | 0.0               | NR           |    |
| Melin 2003    | Control, less intensively treated                      | 21         | 21                                          | 90.7        | 39.4  | 26-57 <sup>c</sup> | 35.2 | 4.6                    | NR                              | 14.3              | NR           |    |
|               | Intensively treated                                    | 22         | 22                                          |             | 40.7  | 25-60 <sup>c</sup> | 35.6 | 4.5                    | NR                              | NR                | NR           |    |
| Menard 2005   | Control - usual care                                   | 36         | 36                                          | 38.9        | 55.9  | 8.6                | 32.6 | 5.7                    | NR                              | 100               | NR           |    |
|               | Intervention - intensive multitherapy                  | 36         | 36                                          | 25          | 53.7  | 7.5                | 32.9 | 5.5                    | NR                              | 100               | NR           |    |
| Mengham 1999  | Control                                                | NR         | 36                                          | 44.4        | 63.5  | 10.9               | 31.7 | 4.9                    | NR                              | 89.2              | NR           |    |
|               | Intervention                                           | NR         | 38                                          | 44.7        | 57.8  | 13.5               | 31.4 | 4.4                    | NR                              |                   | NR           |    |
| Mensing 2016  | Control, Weight Neutral Program                        | 40         | 40                                          | 100         | 39.8  | 4.34               | 37.4 | 0.6                    | NR                              | NR                | NR           |    |
|               | Weight Loss Program                                    | 40         | 40                                          | 100         | 39.4  | 3.91               | 38.6 | 0.7                    | NR                              | NR                | NR           |    |
| Messier 2013  | Exercise only                                          | 150        | 150                                         | 72          | 66    | 6                  | 33.5 | 3.7                    | 8.0                             | 12.0 <sup>#</sup> | 59.3         |    |
|               | Diet-induced weight loss only                          | 152        | 152                                         | 71          | 66    | 6                  | 33.7 | 3.8                    | 12.5                            | 11.8 <sup>#</sup> | 61.2         |    |
|               | Diet-induced weight loss plus exercise                 | 152        | 152                                         | 72          | 65    | 6                  | 33.6 | 3.7                    | 7.2                             | 15.1 <sup>#</sup> | 59.9         |    |
| Miller 2002   | Control Group (Monitoring)                             | 23         | 23                                          | 68          | 54    | 8                  | 34.2 | 6.2                    | NR                              | NR                | 23           |    |
|               | Lifestyle Intervention                                 | 22         | 22                                          | 57          | 53    | 11                 | 32.8 | 5.4                    | NR                              | NR                | 22           |    |

| Study ID       | Groups:                                                                     | Randomised | Number of participants reported at baseline | Gender (%F) | Age  |                  | BMI  |                  | Comorbidities at baseline (%) * |                   |              |
|----------------|-----------------------------------------------------------------------------|------------|---------------------------------------------|-------------|------|------------------|------|------------------|---------------------------------|-------------------|--------------|
|                |                                                                             |            |                                             |             | Mean | SD               | Mean | SD               | CV morbidity                    | Type II DM        | Hypertension |
| Mitsui 2008    | Control                                                                     | 22         | 21                                          | 54.5        | 67.4 | 10.6             | 25.6 | 2.5              | NR                              | NR                | 18.6         |
|                | Intervention                                                                | 24         | 22                                          | 54.2        | 64   | 8.9              | 24.8 | 2.2              | NR                              | NR                |              |
| Molenaar 2010  | Nutritional counselling group (diet D, group)                               | 67         | 67                                          | 42          | 43   | 9                | 31.3 | 2                | NR                              | NR                | NR           |
|                | Nutritional plus exercise counselling group (diet + exercise (D + E) group) | 67         | 67                                          | 42          | 43   | 10               | 30.8 | 1.9              | NR                              | NR                | NR           |
| Moreno 2014    | Low-calorie diet                                                            | 39         | 26                                          | 96.1        | 46.3 | 9.3              | 35.1 | 5.3              | NR                              | 3.8               | 19.2         |
|                | Very low-calorie-ketogenic diet                                             | 40         | 27                                          | 81.4        | 44.4 | 8.6              | 35.1 | 4.5              | NR                              | 7.4               | 14.8         |
| Morgan 2010    | Control (Information and self-help)                                         | 31         | 31                                          | 0           | 34   | 11.6             | 30.5 | 3.0              | NR                              | NR                | NR           |
|                | SHED-IT (Internet) group                                                    | 34         | 34                                          | 0           | 37.5 | 10.4             | 30.6 | 2.7              | NR                              | NR                | NR           |
| Muggia 2014    | Standard care group                                                         | 83         | 83                                          | 71.1        | 43.5 | 10.0             | 32.5 | 3.7              | NR                              | NR                | NR           |
|                | Brief CBT group                                                             | 80         | 80                                          | 76.3        | 46.2 | 11.7             | 31.9 | 3.               | NR                              | NR                | NR           |
| Munsch 2003    | GP control                                                                  | 17         | 122                                         | 58.8        | 45.2 | 23.9             | 32.6 | 1.8              | NR                              | NR                | NR           |
|                | Clinic BASEL                                                                | 52         |                                             | 76.9        |      |                  | 38.5 | 7.5              | NR                              | NR                | NR           |
|                | GP BASEL                                                                    | 53         |                                             | 79.2        |      |                  | 36.2 | 6.5              | NR                              | NR                | NR           |
| Munsch 2007    | Group BWLT                                                                  | 36         | 36                                          | 86.1        | 47.8 | 11.8             | 34.4 | 3.7              | NR                              | NR                | NR           |
|                | Group CBT                                                                   | 44         | 44                                          | 90.9        | 44.4 | 11.5             | 33.7 | 4.3              | NR                              | NR                | NR           |
| Murphy 1982    | Waiting list (N/A)                                                          | N/A        | N/A                                         | N/A         | N/A  | N/A              | N/A  | N/A              | N/A                             | N/A               | N/A          |
|                | Supportive                                                                  | 11         | 11                                          | 63.6        | 42.0 | NR               | NR   | NR               | NR                              | NR                | NR           |
|                | Alone-1 Party                                                               | 13         | 13                                          | 69.2        | 35.3 | NR               | NR   | NR               | NR                              | NR                | NR           |
|                | Alone-2 Party                                                               | 13         | 13                                          | 53.8        | 39.7 | NR               | NR   | NR               | NR                              | NR                | NR           |
|                | Couple-1 Party                                                              | 13         | 13                                          | 61.5        | 42.3 | NR               | NR   | NR               | NR                              | NR                | NR           |
|                | Couple-2 Party                                                              | 12         | 12                                          | 75.0        | 47.5 | NR               | NR   | NR               | NR                              | NR                | NR           |
| Nakata 2014    | Control (N/A)                                                               | 63         | 63                                          | N/A         | N/A  | N/A              | N/A  | N/A              | N/A                             | N/A               | N/A          |
|                | Education-only                                                              | 62         | 62                                          | 66          | 51.7 | 6.8              | 29.2 | 3.8              | NR                              | 0.0               | 29.0         |
|                | Group-based support                                                         | 63         | 63                                          | 81          | 50.7 | 6.7              | 29   | 3.0              | NR                              | 0.0               | 17.5         |
| Nanchahal 2012 | Usual care control                                                          | 190        | 190                                         | 72.6        | 49.4 | 14.1             | 33.0 | 5.4              | NR                              | 12.3              | NR           |
|                | CAMWEL Intervention                                                         | 191        | 191                                         | 71.7        | 48.2 | 15.5             | 33.9 | 5.6              | NR                              |                   | NR           |
| Ng 2015        | Control group                                                               | 43         | 43                                          | 30.7        | 52   | 9.3              | 30.5 | 4.2              | NR                              | 25.6 <sup>#</sup> | 20.9         |
|                | Lifestyle modification program                                              | 61         | 61                                          | 21.3        | 51.4 | 9.1              | 30.2 | 3.9              | NR                              | 23.0 <sup>#</sup> | 26.2         |
| Nicklas 2004   | Healthy lifestyle control                                                   | 78         | 78                                          | 68          | 69   | 0.1 <sup>b</sup> | 34.2 | 0.6 <sup>b</sup> | 35.9                            | 11.5 <sup>#</sup> | 59.0         |
|                | Exercise only                                                               | 80         | 80                                          | 74          | 69   | 0.7 <sup>b</sup> | 34.2 | 0.6 <sup>b</sup> | 42.5                            | 13.8 <sup>#</sup> | 67.5         |
|                | Diet only                                                                   | 82         | 82                                          | 72          | 68   | 0.8 <sup>b</sup> | 34.5 | 0.6 <sup>b</sup> | 28.0                            | 7.3 <sup>#</sup>  | 62.2         |
|                | Diet plus exercise                                                          | 76         | 76                                          | 74          | 76   | 0.8 <sup>b</sup> | 34   | 0.7 <sup>b</sup> | 34.2                            | 15.8 <sup>#</sup> | 57.9         |
| Nicklas 2009   | Calorie restriction (CR) Only                                               | 34         | 34                                          | 100         | 58.4 | 6.0              | 33.9 | 4.0              | 17.6                            | NR                | 32.4         |
|                | CR + Moderate-Intensity                                                     | 40         | 40                                          | 100         | 57.7 | 5.5              | 33.7 | 3.5              | 17.5                            | NR                | 25.0         |
|                | CR + Vigorous-Intensity                                                     | 38         | 38                                          | 100         | 59   | 5.0              | 32.9 | 3.7              | 18.4                            | NR                | 21.1         |
| Nilsen 2011    | Control, Individual Physician Group                                         | 104        | 104                                         | 47          | 45.9 | 11               | 35.9 | 6                | NR                              | NR                | NR           |
|                | Individual Plus Interdisciplinary Group                                     | 109        | 109                                         | 53          | 47   | 11               | 37.6 | 6                | NR                              | NR                | NR           |
| Nordby 2012    | Control                                                                     | 15         | 12                                          | 0           | 31   | 7                | 28   | 1.5              | NR                              | 0.0               | 0.0          |
|                | Training and increased diet (N/A)                                           | 13         | N/A                                         | N/A         | N/A  | N/A              | N/A  | N/A              | N/A                             | N/A               | N/A          |
|                | Training                                                                    | 17         | 12                                          | 0           | 28   | 5                | 28.3 | 1.1              | NR                              | 0.0               | 0.0          |
|                | Energy-reduced diet                                                         | 15         | 12                                          | 0           | 32   | 7                | 28   | 1.3              | NR                              | 0.0               | 0.0          |

| Study ID        | Groups:                                                                          | Randomised | Number of participants reported at baseline | Gender (%F) | Age  |                      | BMI               |                         | Comorbidities at baseline (%) * |            |              |    |
|-----------------|----------------------------------------------------------------------------------|------------|---------------------------------------------|-------------|------|----------------------|-------------------|-------------------------|---------------------------------|------------|--------------|----|
|                 |                                                                                  |            |                                             |             | Mean | SD                   | Mean              | SD                      | CV morbidity                    | Type II DM | Hypertension |    |
| Nurkkala 2015   | Control                                                                          | 30         | 17                                          | 77          | 46   | 10                   | 35.8 <sup>a</sup> | 32.6, 39.4 <sup>a</sup> | NR                              | NR         | NR           |    |
|                 | Intervention group                                                               | 90         | 59                                          | 71          | 46   | 10                   | 34.3 <sup>a</sup> | 32.4, 38.9 <sup>a</sup> | NR                              | NR         | NR           |    |
| Oldroyd 2006    | Control group                                                                    | 39         | 32                                          | 31.25       | 57.5 | 41 – 73 <sup>c</sup> | 29.9              | 4.9                     | NR                              | NR         | NR           |    |
|                 | Intervention group                                                               | 39         | 37                                          | 54.05       | 58.2 | 41 – 75 <sup>c</sup> | 30.4              | 5.6                     | NR                              | NR         | NR           |    |
| Pan 1997        | Control                                                                          | 138        | 138                                         | 43          | 46.6 | 9.3                  | 26.2              | 3.8                     | NR                              | 0.0        | NR           |    |
|                 | Intervention group (Exercise: n=155; Diet: n = 148; Diet plus exercise: n = 135) | 438        | 438                                         | 47          | 44.7 | 9.3                  | 25.6              | 4.0                     | NR                              | 0.0        | NR           |    |
| Parikh 2010     | Control                                                                          | 49         | 49                                          | 84          | 50   | 18                   | 31                | 5.0                     | NR                              | 0.0        | NR           |    |
|                 | Intervention                                                                     | 50         | 50                                          | 86          | 46   | 15                   | 32                | 4.0                     | NR                              | 0.0        | NR           |    |
| Patel 2016      | Control group                                                                    | 50         | 50                                          | 82.0        | 44.9 | 10.6                 | 37.3              | 6.1                     | NR                              | NR         | NR           |    |
|                 | Standard premium discount                                                        | 51         | 49                                          | 81.6        | 45.1 | 9.9                  | 37.2              | 5.4                     | NR                              | NR         | NR           |    |
|                 | Immediate premium discount                                                       | 50         | 48                                          | 87.5        | 45.7 | 9.5                  | 37.1              | 5.3                     | NR                              | NR         | NR           |    |
|                 | Daily lottery incentive                                                          | 50         | 49                                          | 76.0        | 43.9 | 9.2                  | 36.1              | 4.3                     | NR                              | NR         | NR           |    |
| Pavlou 1989a    | Balanced caloric-deficit diet plus supervised exercise                           | 5          | 5                                           | 0           | 49.2 | 2.9 <sup>b</sup>     | NR                | NR                      | NR                              | NR         | NR           |    |
|                 | Balanced caloric-deficit diet - No exercise                                      | 6          | 6                                           |             | 44.8 | 3.2 <sup>b</sup>     | NR                | NR                      | NR                              | NR         | NR           |    |
|                 | Protein-sparing modified fast plus supervised exercise                           | 5          | 5                                           |             | 46.1 | 2.3 <sup>b</sup>     | NR                | NR                      | NR                              | NR         | NR           |    |
|                 | Protein-sparing modified fast - no exercise                                      | 5          | 5                                           |             | 48.1 | 1.9 <sup>b</sup>     | NR                | NR                      | NR                              | NR         | NR           |    |
| Pavlou 1989b    | Balanced caloric-deficit diet - No exercise                                      | 11         | 11                                          | 0           | 42.9 | 2.0 <sup>b</sup>     | NR                | NR                      | NR                              | NR         | NR           |    |
|                 | Balanced caloric-deficit diet plus supervised exercise                           | 10         | 10                                          |             | 41.5 | 2.4 <sup>b</sup>     | NR                | NR                      | NR                              | NR         | NR           |    |
|                 | Protein-sparing modified fast - no exercise                                      | 16         | 16                                          |             | 49.6 | 2.1 <sup>b</sup>     | NR                | NR                      | NR                              | NR         | NR           |    |
|                 | Protein-sparing modified fast plus supervised exercise                           | 16         | 16                                          |             | 45.1 | 2.5 <sup>b</sup>     | NR                | NR                      | NR                              | NR         | NR           |    |
|                 | DPC-70 - no exercise                                                             | 13         | 13                                          |             | 41.8 | 2.1 <sup>b</sup>     | NR                | NR                      | NR                              | NR         | NR           |    |
|                 | DPC-70 - plus supervised exercise                                                | 10         | 10                                          |             | 41.8 | 3.3 <sup>b</sup>     | NR                | NR                      | NR                              | NR         | NR           |    |
|                 | DPC 800 - no exercise                                                            | 16         | 16                                          |             | 44.5 | 2.4 <sup>b</sup>     | NR                | NR                      | NR                              | NR         | NR           |    |
|                 | DPC 800 plus supervised exercise                                                 | 18         | 18                                          |             | 46.1 | 2.2 <sup>b</sup>     | NR                | NR                      | NR                              | NR         | NR           |    |
| Pearce 1981     | Alternative treatment                                                            | 14         | 68                                          | 100         | 39   | NR                   | NR                | NR                      | NR                              | 0.0        | NR           |    |
|                 | Wives alone                                                                      | 13         |                                             |             |      | NR                   | NR                | NR                      | NR                              | 0.0        | NR           |    |
| Pedersen 2013   | Aerobic interval training                                                        | 35         | 26                                          | 15          | 62.3 | 5.7                  | 31.6 <sup>a</sup> | 29.6, 34.8 <sup>a</sup> | 26                              | 0          | 96.4         |    |
|                 | Low energy diet                                                                  | 35         | 29                                          | 28          | 63.8 | 6.8                  | 31.1 <sup>a</sup> | 29.9, 32.7 <sup>a</sup> | 29                              | 0          |              |    |
| Pekkarinen 2015 | Control, Follow up without intervention                                          | 99         | 99                                          | 72          | 47.3 | 10.5                 | 42.1              | 5.7                     | NR                              | NR         | NR           |    |
|                 | One-year maintenance program                                                     | 100        | 100                                         | 71          | 47.4 | 10.1                 | 41.4              | 6.4                     | NR                              | NR         | NR           |    |
| Perri 1984      | Non-behavioural therapy                                                          | 15         | 129                                         | 89.2        | 38.8 | NR                   | NR                | NR                      | NR                              | NR         | NR           |    |
|                 | Non-behavior therapy plus post-treatment contact                                 | 16         |                                             |             |      | NR                   | NR                | NR                      | NR                              | NR         | NR           | NR |
|                 | Behavior therapy                                                                 | 21         |                                             |             |      | NR                   | NR                | NR                      | NR                              | NR         | NR           | NR |

| Study ID        | Groups:                                                                       | Randomised | Number of participants reported at baseline | Gender (%F) | Age  |      | BMI  |     | Comorbidities at baseline (%) * |            |              |
|-----------------|-------------------------------------------------------------------------------|------------|---------------------------------------------|-------------|------|------|------|-----|---------------------------------|------------|--------------|
|                 |                                                                               |            |                                             |             | Mean | SD   | Mean | SD  | CV morbidity                    | Type II DM | Hypertension |
|                 | Behavior therapy plus relapse prevention training                             | 15         |                                             |             |      |      |      |     |                                 |            |              |
|                 | Behavior therapy plus post-treatment contact                                  | 15         |                                             |             |      |      |      |     |                                 |            |              |
|                 | Behavior therapy plus relapse prevention training plus post-treatment contact | 17         |                                             |             |      |      |      |     |                                 |            |              |
| Perri 1986      | Behavior therapy                                                              | NR         | 90                                          | 84.4        | 43.3 | NR   | NR   | NR  | NR                              | NR         | NR           |
|                 | Behavior therapy plus maintenance                                             | NR         |                                             |             |      | NR   | NR   | NR  | NR                              | NR         | NR           |
|                 | Behavior therapy plus aerobic exercise                                        | NR         |                                             |             |      | NR   | NR   | NR  | NR                              | NR         | NR           |
|                 | Behavior therapy behavior therapy plus aerobic exercise plus maintenance      | NR         |                                             |             |      | NR   | NR   | NR  | NR                              | NR         | NR           |
| Perri 1987      | Behavior therapy only                                                         | 22         | 22                                          | 81.8        | NR   | NR   | NR   | NR  | NR                              | NR         | NR           |
|                 | Behavior therapy plus a peer self-help group maintenance program              | 46         | 46                                          | 78.3        | NR   | NR   | NR   | NR  | NR                              | NR         | NR           |
|                 | Behavior therapy plus a therapist-contact maintenance program                 | 41         | 41                                          | 80.5        | NR   | NR   | NR   | NR  | NR                              | NR         | NR           |
| Perri 1989      | Standard treatment group                                                      | 24         | NR                                          | 83.3        | NR   | NR   | NR   | NR  | NR                              | NR         | NR           |
|                 | Extended treatment regimen                                                    | 24         | NR                                          | 75          | NR   | NR   | NR   | NR  | NR                              | NR         | NR           |
| Perri 1997      | WL + Home-based exercise                                                      | 24         | 23                                          | 100         | 48.9 | 5.0  | 33.1 | 2.9 | NR                              | NR         | NR           |
|                 | WL + Group-based exercise                                                     | 25         | 25                                          | 100         | 48.7 | 6.2  | 34.0 | 4.5 | NR                              | NR         | NR           |
| Perri 2001      | Control, Standard Behavioural Therapy (BT)                                    | NR         | 18                                          | 100         | 45.2 | 10.1 | 36.4 | 4.7 | NR                              | NR         | NR           |
|                 | BT + Relapse prevention training                                              | NR         | 28                                          | 100         | 49.2 | 7.2  | 35   | 4.0 | NR                              | NR         | NR           |
|                 | BT + problem-solving therapy                                                  | NR         | 34                                          | 100         | 45.4 | 9.3  | 36.1 | 4.9 | NR                              | NR         | NR           |
| Perri 2014      | Control, Education group                                                      | 169        | 169                                         | 81.7        | 52   | 10.8 | 36.3 | 3.9 | NR                              | NR         | NR           |
|                 | Low dose, (low intensity lifestyle counselling)                               | 148        | 148                                         | 75.7        | 51.5 | 12.3 | 36.1 | 4.2 | NR                              | NR         | NR           |
|                 | Moderate dose, (Moderate intensity lifestyle counselling)                     | 134        | 134                                         | 81.3        | 52.8 | 10.6 | 36.2 | 3.8 | NR                              | NR         | NR           |
|                 | High dose, (High intensity lifestyle counselling)                             | 161        | 161                                         | 74.5        | 53.2 | 12.0 | 36.7 | 4.0 | NR                              | NR         | NR           |
| Pettman 2009    | Control                                                                       | 50         | 50                                          | 72          | NR   | NR   | 36.5 | 6.5 | NR                              | NR         | NR           |
|                 | Intervention B - Passive follow-up                                            | 54         | NR                                          | NR          | NR   | NR   | 37.3 | 6.2 | NR                              | NR         | NR           |
|                 | Intervention A - Active follow-up                                             | 49         | NR                                          | NR          | NR   | NR   | 36.1 | 6.6 | NR                              | NR         | NR           |
| Poelman 2015    | Control Condition                                                             | 139        | 139                                         | 84.2        | 45.4 | 9.2  | 32.9 | 5.0 | NR                              | NR         | NR           |
|                 | Intervention condition                                                        | 139        | 139                                         | 84.9        | 45.9 | 9.2  | 32   | 4.6 | NR                              | NR         | NR           |
| Promrat 2010    | Control                                                                       | 10         | 10                                          | 20          | 47.6 | 12.0 | 33.7 | 4.7 | NR                              | 40.0       | NR           |
|                 | Lifestyle Intervention                                                        | 21         | 21                                          | 33.3        | 48.9 | 10.9 | 33.9 | 5.3 | NR                              | 52.4       | NR           |
| Provencher 2009 | Control group                                                                 | 48         | 47                                          | 100         | 41.8 | 6.0  | 30.5 | 3.0 | NR                              | 0.0        | NR           |
|                 | Social support                                                                | 48         | 46                                          | 100         | 42.3 | 5.5  | 30.6 | 3.1 | NR                              | 0.0        | NR           |
|                 | Health-At-Every-Size                                                          | 48         | 48                                          | 100         | 42.8 | 5.5  | 30.1 | 3.0 | NR                              | 0.0        | NR           |
| Ptomey 2018     | Conventional Diet                                                             | 72         | 72                                          | 54.2        | 37   | 12.5 | 36.4 | 8.1 | NR                              | NR         | NR           |
|                 | Enhanced Stop Light Diet                                                      | 78         | 77                                          | 59.7        | 36.1 | 12.0 | 37.5 | 7.6 | NR                              | NR         | NR           |
| Ramirez 2001    | Weight control only                                                           | 40         | 65                                          | NR          | 44   | 9.7  | 33.8 | 5.1 | NR                              | NR         | NR           |
|                 | Weight control plus body image therapy                                        | 48         |                                             | NR          |      |      |      |     | NR                              | NR         |              |
| Rejeski 2011    | Successful aging control arm                                                  | 93         | 93                                          | 66.7        | 67.2 | 4.8  | 32.6 | 3.5 | 100                             | 19.4       | 64.5         |
|                 | Physical activity                                                             | 97         | 97                                          | 66.0        | 67.2 | 5.1  | 32.8 | 3.9 | 100                             | 15.5       | 67.0         |

| Study ID        | Groups:                                                | Randomised | Number of participants reported at baseline | Gender (%F) | Age  |                    | BMI   |                        | Comorbidities at baseline (%) * |                   |              |
|-----------------|--------------------------------------------------------|------------|---------------------------------------------|-------------|------|--------------------|-------|------------------------|---------------------------------|-------------------|--------------|
|                 |                                                        |            |                                             |             | Mean | SD                 | Mean  | SD                     | CV morbidity                    | Type II DM        | Hypertension |
| Ridgeway 1999   | Weight loss and physical activity                      | 98         | 98                                          | 68.4        | 66.8 | 4.6                | 33.1  | 4.1                    | 100                             | 16.3              | 74.5         |
|                 | Control                                                | 28         | 20                                          | 75          | 65   | NR                 | NR    | NR                     | NR                              | 100               | NR           |
|                 | Intervention Group                                     | 28         | 18                                          | 61          | 62   | NR                 | NR    | NR                     | NR                              | 100               | NR           |
| Rock 2015       | Control                                                | 349        | 348                                         | 100         | 56.5 | 9.5                | 31.4  | 4.6                    | NR                              | NR                | 28.7         |
|                 | Intervention                                           | 348        | 345                                         | 100         | 56.1 | 9.4                | 31.6  | 4.7                    | NR                              | NR                | 30.7         |
| Rolls 2005      | Comparison-control                                     | 50         | 50                                          | NR          | 45.2 | 1.2 <sup>b</sup>   | 31.3  | 0.4 <sup>b</sup>       | NR                              | NR                | NR           |
|                 | Two snacks                                             | 50         | 50                                          | NR          | 44.5 | 1.2 <sup>b</sup>   | 31.4  | 0.4 <sup>b</sup>       | NR                              | NR                | NR           |
|                 | One soup                                               | 50         | 50                                          | NR          | 45.1 | 1.2 <sup>b</sup>   | 30.9  | 0.5 <sup>b</sup>       | NR                              | NR                | NR           |
|                 | Two soups                                              | 50         | 50                                          | NR          | 43.8 | 1.2 <sup>b</sup>   | 30.8  | 0.5 <sup>b</sup>       | NR                              | NR                | NR           |
| Rolls 2017      | Standard advice                                        | 62         | 62                                          | 100         | 49.5 | 12.0               | 34.1  | 4.3                    | NR                              | NR                | NR           |
|                 | Pre-portioned foods group                              | 62         | 62                                          | 100         | 50.1 | 10.1               | 34.2  | 4.1                    | NR                              | NR                | NR           |
|                 | Portion selection group                                | 62         | 62                                          | 100         | 50.4 | 9.6                | 33.6  | 4.2                    | NR                              | NR                | NR           |
| Rosas 2015      | Usual care                                             | 41         | 41                                          | 78          | 47.6 | 10.5               | 34.9  | 4.4                    | NR                              | 43.9 <sup>#</sup> | NR           |
|                 | Case-management intervention                           | 84         | 84                                          | 76.2        | 47.9 | 11.9               | 36    | 5.7                    | NR                              | 44.0 <sup>#</sup> | NR           |
|                 | Case-management + Community health worker intervention | 82         | 82                                          | 76.8        | 46   | 10.7               | 35.5  | 5.1                    | NR                              | 41.5 <sup>#</sup> | NR           |
| Ross 2012       | Control condition                                      | 241        | 241                                         | 70.1        | 52.4 | 11.8               | 32    | 4.2                    | NR                              | NR                | 33.2         |
|                 | Behavioral intervention group                          | 249        | 249                                         | 70.28       | 51.3 | 11                 | 32.6  | 4.1                    | NR                              | NR                | 25.7         |
| Samaras 1997    | Control                                                | 13         | 13                                          | 53.8        | 60.5 | 2.1 <sup>b</sup>   | 35.7  | 1.6 <sup>b</sup>       | NR                              | NR                | NR           |
|                 | Intervention                                           | 13         | 13                                          | 69.2        | 60.5 | 7.8 <sup>b</sup>   | 32.3  | 1.1 <sup>b</sup>       | NR                              | NR                | NR           |
| Santanasto 2011 | Physical Activity plus Successful Ageing               | 15         | 15                                          | 86.7        | 69.9 | 5.9                | 32    | 3.1                    | NR                              | NR                | NR           |
|                 | Physical Activity plus Weight Loss                     | 21         | 21                                          | 81          | 70.6 | 5.9                | 33.6  | 3.3                    | NR                              | NR                | NR           |
| Sattin 2016     | Health Education intervention                          | 287        | 287                                         | 82.6        | 46.4 | 10.9               | 35.6  | 7.6                    | NR                              | 0                 | NR           |
|                 | Fit body and soul intervention                         | 317        | 317                                         | 84.2        | 46.6 | 10.9               | 35.8  | 7                      | NR                              | 0                 | NR           |
| Schubel 2016    | Control group                                          | 52         | 52                                          | 52          | 50.7 | 7.1                | 31.1  | 3.6                    | NR                              | 0                 | NR           |
|                 | Continuous Calorie Restriction                         | 49         | 49                                          | 49          | 50.5 | 8.0                | 31.2  | 4.0                    | NR                              | 0                 | NR           |
|                 | Intermittent Calorie Restriction                       | 49         | 49                                          | 49          | 49.4 | 9.0                | 32    | 3.8                    | NR                              | 0                 | NR           |
| Seligman 2011   | Standard-of-care strategy                              | 25         | 25                                          | 32          | 42   | 8 <sup>b</sup>     | 34.7  | 0.6 <sup>b</sup>       | NR                              | NR                | 52.0         |
|                 | Healthy diet and step counter                          | 25         | 25                                          | 36          | 44   | 7 <sup>b</sup>     | 34.4  | 0.6 <sup>b</sup>       | NR                              | NR                | 64.0         |
|                 | Healthy diet and fitness                               | 26         | 25                                          | 36          | 43   | 8 <sup>b</sup>     | 35.2  | 0.5 <sup>b</sup>       | NR                              | NR                | 64.0         |
| Shikany 2013    | Food-based diet                                        | 60         | 60                                          | 90          | 39.7 | 9.1                | 41.3  | 3.8                    | NR                              | NR                | NR           |
|                 | Meal replacement                                       | 60         | 60                                          | 86.7        | 40.2 | 9.2                | 40.6  | 3.8                    | NR                              | NR                | NR           |
| Sikand 1988     | No exercisers                                          | 15         | 15                                          | 100         | 37.8 | 8.4                | NR    | NR                     | NR                              | NR                | NR           |
|                 | Exercisers                                             | 15         | 15                                          | 100         | 39.8 | 9.1                | NR    | NR                     | NR                              | NR                | NR           |
| Silva 2010      | Comparison group                                       | 116        | 116                                         | 100         | 37.1 | 6.99               | 31.3  | 4.00                   | NR                              | NR                | NR           |
|                 | Intervention                                           | 123        | 123                                         | 100         | 38.1 | 7.04               | 31.7  | 4.24                   | NR                              | NR                | NR           |
| Snel 2012       | VLCD only                                              | 14         | 14                                          | 38.5        | 56   | 2                  | 37.9  | 1.4                    | NR                              | 100               | NR           |
|                 | VLCD + exercise                                        | 13         | 13                                          | 57.1        | 53   | 3                  | 36.4  | 1.1                    | NR                              | 100               | NR           |
| Solbrig 2019    | Motivational interviewing                              | 58         | 55                                          | 72.72       | 42   | 19–70 <sup>e</sup> | 32.54 | 24.5–53.3 <sup>c</sup> | NR                              | NR                | NR           |
|                 | Functional imagery training                            | 63         | 59                                          | 72.88       | 45   | 20–72 <sup>e</sup> | 33.21 | 26.0–48.0 <sup>c</sup> | NR                              | NR                | NR           |

| Study ID              | Groups:                                                                           | Randomised | Number of participants reported at baseline | Gender (%F) | Age   |                    | BMI   |                        | Comorbidities at baseline (%) * |                  |              |
|-----------------------|-----------------------------------------------------------------------------------|------------|---------------------------------------------|-------------|-------|--------------------|-------|------------------------|---------------------------------|------------------|--------------|
|                       |                                                                                   |            |                                             |             | Mean  | SD                 | Mean  | SD                     | CV morbidity                    | Type II DM       | Hypertension |
| Somers 2012           | Standard Care                                                                     | 51         | 51                                          | 78          | 57.9  | 10.1               | 34.1  | 4.6                    | NR                              | NR               | NR           |
|                       | Lifestyle behavioral weight management intervention only                          | 59         | 59                                          | 80          | 58.3  | 11.0               | 33.5  | 4.4                    | NR                              | NR               | NR           |
|                       | Lifestyle behavioral weight management intervention + Pain Coping Skills Training | 62         | 62                                          | 92          | 57.5  | 9.43               | 34.1  | 4.3                    | NR                              | NR               | NR           |
|                       | Pain Coping Skills Training only (N/A)                                            | 60         | 60                                          | N/A         | N/A   | N/A                | N/A   | N/A                    | N/A                             | N/A              | N/A          |
| Spring 2013           | MOVE standard care                                                                | 35         | 35                                          | 14.2        | 57.7  | 10.2               | 35.8  | 3.8                    | NR                              | NR               | NR           |
|                       | MOVE + personal digital assistant                                                 | 34         | 34                                          | 14.7        | 57.7  | 13.5               | 36.9  | 5.4                    | NR                              | NR               | NR           |
| Spring 2017           | Control self-guided program                                                       | 32         | 32                                          | 84.4        | 40.1  | 11.1               | 34.3  | 3.2                    | NR                              | NR               | NR           |
|                       | Standard weight loss program                                                      | 32         | 32                                          | 81.3        | 37.3  | 13.3               | 34.8  | 3.0                    | NR                              | NR               | NR           |
|                       | Technology-supported                                                              | 32         | 32                                          | 87.5        | 40.4  | 10.7               | 34.8  | 2.8                    | NR                              | NR               | NR           |
| Stahre 2005           | Control                                                                           | 43         | 43                                          | 100         | 45.2  | 11.3               | 39.2  | NR                     | NR                              | NR               | NR           |
|                       | Cognitive treatment                                                               | 62         | 62                                          | 100         | 45.4  | 9.8                | 40.4  | NR                     | NR                              | NR               | NR           |
| Stahre 2007           | Control Group (weight-reducing program)                                           | 27         | 16                                          | 100         | 47    | 8.2                | NR    | NR                     | NR                              | NR               | NR           |
|                       | Cognitive treatment group                                                         | 27         | 26                                          | 100         | 50.1  | 7.8                | NR    | NR                     | NR                              | NR               | NR           |
| Stalonas 1978         | Basic weight loss program                                                         | 12         | 44                                          | 84.1        | 31.5  | 16-62 <sup>c</sup> | NR    | NR                     | NR                              | NR               | NR           |
|                       | WL program plus contingency component                                             | 12         |                                             |             |       |                    | NR    | NR                     | NR                              | NR               | NR           |
|                       | WL program plus exercise and contingency components                               | 10         |                                             |             |       |                    | NR    | NR                     | NR                              | NR               | NR           |
|                       | WL program plus exercise component                                                | 10         |                                             |             |       |                    | NR    | NR                     | NR                              | NR               | NR           |
| Stenius-Aarniala 2000 | Control                                                                           | 19         | 19                                          | 68.7        | 48.3  | 23-60 <sup>c</sup> | 36.7  | 32.8-41.8 <sup>c</sup> | NR                              | NR               | NR           |
|                       | Treatment with VLCD                                                               | 19         | 19                                          | 68.4        | 49.7  | 34-60 <sup>c</sup> | 35.8  | 31.3-39.4 <sup>c</sup> | NR                              | NR               | NR           |
| Stevens 1993          | Control                                                                           | 256        | 256                                         | 37          | 42.4  | 6.2                | 29.5  | 2.8                    | NR                              | NR               | 0.0          |
|                       | Intervention                                                                      | 308        | 308                                         | 17          | 43.1  | 6.0                | 29.5  | 2.9                    | NR                              | NR               | 0.0          |
| Stevens 2001          | Control                                                                           | 596        | 596                                         | 31.7        | 43.2  | 6.1                | 30.9  | 3.2                    | NR                              | NR               | NR           |
|                       | Intervention                                                                      | 595        | 595                                         | 37          | 43.4  | 6.1                | 31    | 3.3                    | NR                              | NR               | NR           |
|                       | Sodium only intervention (N/A)                                                    | 594        | N/A                                         | N/A         | N/A   | N/A                | N/A   | N/A                    | N/A                             | N/A              | N/A          |
|                       | Combined intervention (N/A)                                                       | 597        | N/A                                         | N/A         | N/A   | N/A                | N/A   | N/A                    | N/A                             | N/A              | N/A          |
| Stolley 2017          | Moving Forward Self-Guided program                                                | 121        | 121                                         | 100         | 58.1  | 10.1               | NR    | NR                     | NR                              | NR               | 51.1         |
|                       | Moving Forward Interventionist-Guided program                                     | 125        | 125                                         | 100         | 56.8  | 10.0               | NR    | NR                     | NR                              | NR               |              |
| Strobl 2013           | Control, Usual care                                                               | 239        | 239                                         | 44          | 48.03 | 9.8                | 36.3  | 3.4                    | NR                              | NR               | NR           |
|                       | Telephone aftercare                                                               | 228        | 228                                         | 46          | 48.54 | 9.8                | 35.4  | 3.6                    | NR                              | NR               | NR           |
| Sundfor 2018          | Continuous energy restriction                                                     | 58         | 58                                          | 51.7        | 47.5  | 11.6               | 35.3  | 3.5                    | NR                              | 6.9 <sup>#</sup> | 92.0         |
|                       | Intermittent energy restriction                                                   | 54         | 54                                          | 48.1        | 49.9  | 10.1               | 35.1  | 3.9                    | NR                              | 1.9 <sup>#</sup> | 37.0         |
| Tapsell 2017          | Usual care (Control)                                                              | 126        | 126                                         | 73          | 43.8  | 7.46               | 32.49 | 4.12                   | NR                              | NR               | 11.1         |
|                       | Intervention Group                                                                | 125        | 124                                         | 73          | 43.79 | 7.97               | 32.59 | 4.25                   | NR                              | NR               | 16.1         |
|                       | Intervention plus food supplement group (N/A)                                     | 126        | N/A                                         | N/A         | N/A   | N/A                | N/A   | N/A                    | N/A                             | N/A              | N/A          |
| TarragaMarcos 2017    | G3                                                                                | 55         | 55                                          | 32.4        | 49.8  | 6.6                | 30.7  | 3.4                    | NR                              | NR               | NR           |
|                       | G2                                                                                | 61         | 61                                          | 34.3        | 49.7  | 6.4                | 30.8  | 3.6                    | NR                              | NR               | NR           |
|                       | G1                                                                                | 60         | 60                                          | 33.3        | 50.1  | 7.2                | 30.3  | 3.2                    | NR                              | NR               | NR           |
| Teeriniemi 2018       | Control                                                                           | 89         | 89                                          | 51.7        | 46.5  | 10.2               | 30.5  | 2.3                    | NR                              | 2.2 <sup>#</sup> | 25.8         |
|                       | SHG Counselling                                                                   | 87         | 87                                          | 48.3        | 44.4  | 10.2               | 30.7  | 2.2                    | NR                              | 2.3 <sup>#</sup> | 26.4         |



| Study ID                           | Groups:                                 | Randomised | Number of participants reported at baseline | Gender (%F) | Age  |      | BMI  |      | Comorbidities at baseline (%) * |                  |              |
|------------------------------------|-----------------------------------------|------------|---------------------------------------------|-------------|------|------|------|------|---------------------------------|------------------|--------------|
|                                    |                                         |            |                                             |             | Mean | SD   | Mean | SD   | CV morbidity                    | Type II DM       | Hypertension |
|                                    | CBT Counselling                         | 85         | 85                                          | 49.4        | 46.4 | 9.7  | 30.5 | 1.9  | NR                              | 3.5 <sup>#</sup> | 20.0         |
|                                    | Control plus HBCSS                      | 91         | 91                                          | 47.3        | 47   | 9.4  | 30.3 | 2.0  | NR                              | 3.3 <sup>#</sup> | 22.0         |
|                                    | SHG Counselling plus HBCSS              | 92         | 92                                          | 48.9        | 46.4 | 10.5 | 30.4 | 2.1  | NR                              | 1.1 <sup>#</sup> | 25.0         |
|                                    | CBT Counselling plus HBCSS              | 88         | 88                                          | 50          | 44.8 | 9.6  | 30.3 | 2.1  | NR                              | 2.3 <sup>#</sup> | 15.9         |
|                                    | GP usual care                           | 232        | 232                                         | 53.9        | 56.9 | 7.8  | 29.6 | 3.6  | NR                              | NR               | 62.5         |
| ter Bogt 2009                      | Lifestyle counselling from NP           | 225        | 225                                         | 49.8        | 55.3 | 7.7  | 29.5 | 3.1  | NR                              | NR               | 60.9         |
| The Look AHEAD Research Group 2010 | Diabetes support and education          | 2575       | 2575                                        | 59.6        | 58.9 | 6.9  | 36   | 5.8  | NR                              | 100.0            | 84.0         |
|                                    | Intensive lifestyle intervention        | 2570       | 2570                                        | 59.3        | 58.6 | 6.8  | 35.9 | 6.0  | NR                              | 100.0            | 84.5         |
| Trepanowski 2017                   | No-intervention control group           | 31         | 31                                          | 87          | 44   | 11   | 34   | 4    | 0                               | 0                | NR           |
|                                    | Daily calorie restriction group         | 35         | 35                                          | 83          | 43   | 12   | 35   | 4    | 0                               | 0                | NR           |
|                                    | Alternate-day fasting group             | 34         | 34                                          | 88          | 44   | 10   | 34   | 4    | 0                               | 0                | NR           |
| Tsai 2010                          | Control                                 | 26         | 26                                          | 88          | 47.6 | 12.7 | 37.6 | 5.6  | NR                              | NR               | NR           |
|                                    | Brief counselling                       | 24         | 24                                          |             | 51.3 | 11.3 | 35.4 | 5.9  | NR                              | NR               | NR           |
| Tuomilehto 2009                    | Control                                 | 41         | 41                                          | 27          | 50.9 | 8.6  | 31.4 | 2.7  | NR                              | 7.3              | 36.6         |
|                                    | Intervention                            | 40         | 40                                          | 25.7        | 51.8 | 9.0  | 33.4 | 2.8  | NR                              | 10               | 45.0         |
| van de Glind 2017                  | Comparison group                        | 553        | 553                                         | 0.0         | 45.6 | 8.7  | 33.4 | 4.7  | NR                              | NR               | NR           |
|                                    | EuroFIT group                           | 560        | 560                                         | 0.0         | 45.9 | 9.0  | 33.1 | 4.6  | NR                              | NR               | NR           |
| vanWier 2011                       | Control – Brochure                      | 460        | 460                                         | 33.5        | 43   | 8.7  | 29.6 | 3.7  | 2.0                             | 2.0 <sup>#</sup> | 10.0         |
|                                    | Internet Group                          | 464        | 464                                         | 34.9        | 43   | 8.4  | 29.6 | 3.4  |                                 |                  |              |
|                                    | Phone Group                             | 462        | 462                                         | 30.5        | 43   | 8.8  | 29.5 | 3.5  |                                 |                  |              |
| Viegener 1990                      | Intermittent diet                       | 42         | 32                                          | 100         | 47.1 | 8.9  | NR   | NR   | NR                              | NR               | NR           |
|                                    | Standard treatment                      |            | 31                                          | 100         | 47.1 | 7.5  | NR   | NR   | NR                              | NR               | NR           |
| Visser 2010                        | Control                                 | 21         | 21                                          | 74.7        | 44.8 | 11.4 | 30.8 | 3.4  | NR                              | NR               | NR           |
|                                    | Diet only group (Diet)                  | 20         | 20                                          |             | 45.5 | 13.1 | 32.9 | 3.1  | NR                              | NR               | NR           |
|                                    | Diet + fitness training group (Fitness) | 20         | 20                                          |             | 44.7 | 13   | 33.1 | 3.4  | NR                              | NR               | NR           |
|                                    | Diet + WBV group (Vibration)            | 18         | 18                                          |             | 43.3 | 9.6  | 31.9 | 4.7  | NR                              | NR               | NR           |
| Volpe 2008                         | Exercise only                           | 34         | 34                                          | 50          | 43.5 | 7.5  | 30.5 | 3.1  | NR                              | NR               | NR           |
|                                    | Diet only                               | 28         | 28                                          | 53.6        | 44.0 | 6.2  | 30.9 | 2.8  | NR                              | NR               | NR           |
|                                    | Combination of diet and exercise        | 28         | 28                                          | 50          | 45.7 | 7.4  | 30.5 | 2.6  | NR                              | NR               | NR           |
| von Gruenigen 2012                 | Control                                 | 34         | 34                                          | 100         | 58.9 | 10.9 | 36.5 | 9.6  | NR                              | 26.5             | 35.3         |
|                                    | Intervention                            | 41         | 41                                          | 100         | 57.0 | 8.6  | 36.4 | 5.5  | NR                              | 14.1             | 31.8         |
| von Gruenigen 2008                 | Control, Usual care                     | 22         | 22                                          | 100         | 55.4 | 7.5  | 41.1 | 10.3 | NR                              | NR               | NR           |
|                                    | Lifestyle intervention                  | 23         | 23                                          | 100         | 54.0 | 9.6  | 43.5 | 10.1 | NR                              | NR               | NR           |
| Wadden 1986                        | VLCD                                    | 18         | 15                                          | 84.7        | 44.3 | 8.7  | NR   | NR   | NR                              | NR               | NR           |
|                                    | Behaviour                               | 18         | 16                                          |             | 44.3 | 8.6  | NR   | NR   | NR                              | NR               | NR           |
|                                    | Combined                                | 23         | 19                                          |             | 43.6 | 7.8  | NR   | NR   | NR                              | NR               | NR           |
| Wadden 1994                        | Balanced deficit diet                   | 21         | 21                                          | 100         | 42.9 | 10.1 | 38.8 | 5.4  | NR                              | NR               | NR           |
|                                    | Very low-calorie diet                   | 28         | 28                                          | 100         | 36.8 | 8.9  | 40.0 | 5.7  | NR                              | NR               | NR           |
| Wadden 1998                        | Diet alone, Control                     | NR         | 29                                          | 100         | 41   | 8.8  | NR   | NR   | NR                              | 0.0              | NR           |
|                                    | Diet plus aerobic exercise              | NR         | 31                                          | 100         | 40.8 | 7.9  | NR   | NR   | NR                              | 0.0              | NR           |

| Study ID              | Groups:                                                                                     | Randomised | Number of participants reported at baseline | Gender (%F) | Age  |                 | BMI  |                | Comorbidities at baseline (%) * |            |              |
|-----------------------|---------------------------------------------------------------------------------------------|------------|---------------------------------------------|-------------|------|-----------------|------|----------------|---------------------------------|------------|--------------|
|                       |                                                                                             |            |                                             |             | Mean | SD              | Mean | SD             | CV morbidity                    | Type II DM | Hypertension |
| Wadden 2004           | Diet plus strength training                                                                 | NR         | 31                                          | 100         | 40   | 9.1             | NR   | NR             | NR                              | 0.0        | NR           |
|                       | Diet plus aerobic and strength training                                                     | NR         | 29                                          | 100         | 42.8 | 8.3             | NR   | NR             | NR                              | 0.0        | NR           |
|                       | Nondietering approach                                                                       | 39         | 39                                          | 100         | 43.9 | 10.2            | 35.5 | 4.3            | NR                              | NR         | NR           |
|                       | Balanced-deficit diet                                                                       | 43         | 43                                          | 100         | 45.6 | 9.2             | 36.3 | 4.9            | NR                              | NR         | NR           |
|                       | Meal replacement plan                                                                       | 41         | 41                                          | 100         | 43   | 10.5            | 36   | 4.2            | NR                              | NR         | NR           |
| Waleekhachonloet 2007 | Individual behavior therapy                                                                 | 67         | 67                                          | 100         | 38.6 | 7.7             | 28.9 | 3.2            | NR                              | NR         | NR           |
|                       | Group behavior therapy                                                                      | 65         | 65                                          | 100         | 38.3 | 8.2             | 28.8 | 2.5            | NR                              | NR         | NR           |
| Weinstock 2013        | Conference Call DPP                                                                         | 128        | 128                                         | 71.9        | 52.7 | 12.8            | 39.7 | 8.3            | NR                              | 0.0        | 66.1         |
|                       | Individual Call DPP                                                                         | 129        | 129                                         | 78.3        | 50.7 | 13.1            | 38.9 | 7.6            | NR                              |            |              |
| West 2007             | Attention control                                                                           | 108        | 108                                         | NR          | 52   | 10              | 36.5 | 5.4            | NR                              | 100.0      | NR           |
|                       | Motivational interviewing                                                                   | 109        | 109                                         | NR          | 54   | 10              | 36.5 | 5.5            | NR                              | 100.0      | NR           |
| West 2011             | Control                                                                                     | 112        | 112                                         | 77          | 71.9 | 6.6             | 35.0 | 4.2            | NR                              | NR         | NR           |
|                       | Lifestyle Intervention                                                                      | 116        | 116                                         | 91          | 70.6 | 6.6             | 37.1 | 5.7            | NR                              | NR         | NR           |
| West 2016             | Internet behavioral weight control treatment                                                | 199        | 199                                         | 90.0        | 48.9 | 10.7            | 36.1 | 6.1            | NR                              | NR         | NR           |
|                       | Internet behavioral weight control treatment + Motivational interviewing                    | 199        | 199                                         | 89.5        | 47.9 | 9.5             | 35.9 | 6.0            | NR                              | NR         | NR           |
| Whelton 1998          | Non-weight loss (Usual lifestyle, control group plus sodium reduction)                      | NR         | NR                                          | 57          | NR   | NR              | 31.1 | 2.4            | NR                              | NR         | 100.0        |
|                       | Weight loss (Weight loss alone plus weight loss and sodium reduction combined intervention) | NR         | NR                                          | 47          | NR   | NR              | 31.2 | 2.2            | NR                              | NR         | 100.0        |
| Wilson 2010           | Guided Self-help Based on CBT                                                               | 66         | 66                                          | 82          | 50.3 | 13.6            | 36.2 | 4.3            | NR                              | NR         | NR           |
|                       | Behavioral Weight Loss Treatment                                                            | 64         | 64                                          | 89          | 46.2 | 10.9            | 36.8 | 5.5            | NR                              | NR         | NR           |
|                       | Interpersonal Psychotherapy                                                                 | 75         | 75                                          | 85          | 48.7 | 11.2            | 36.3 | 5.1            | NR                              | NR         | NR           |
| Wilson 2016           | Control - Self Study Group                                                                  | 242        | 147                                         | 59.9        | 46.6 | NR              | 34.5 | NR             | NR                              | NR         | NR           |
|                       | Phone Fuel Your Life                                                                        | 182        | 106                                         | 67.9        | 47.8 | NR              | 33.6 | NR             | NR                              | NR         | NR           |
|                       | Group Fuel Your Life                                                                        | 236        | 165                                         | 58.2        | 45.9 | NR              | 32.7 | NR             | NR                              | NR         | NR           |
| Wilson 2016b          | Control                                                                                     | 457        | 457                                         | 6.3         | 47   | NR              | 29.9 | 5.6            | NR                              | NR         | NR           |
|                       | FUEL Your Life peer health coaches + nurse education                                        | 459        | 459                                         | 5.4         | 44   | NR              | 31.9 | 5.4            | NR                              | NR         | NR           |
| Wing 1985             | Standard-care condition                                                                     | NR         | 53                                          | 62.3        | 55.1 | 10 <sup>b</sup> | 34.8 | 7 <sup>b</sup> | NR                              | 100.0      | NR           |
|                       | Nutrition education                                                                         | NR         |                                             |             |      |                 |      |                | NR                              |            |              |
|                       | Behavior modification                                                                       | NR         |                                             |             |      |                 |      |                | NR                              |            |              |
| Wing 1988             | Diet plus placebo exercise                                                                  | 13         | 13                                          | 84          | 52.5 | 8.9             | 37.5 | 6.2            | NR                              | 100.0      | NR           |
|                       | Diet plus moderate exercise                                                                 | 12         | 12                                          |             | 56.2 | 7.5             | 38.1 | 6.4            | NR                              | 100.0      | NR           |
| Wing 1988b            | Diet only                                                                                   | 15         | 15                                          | 70.0        | 55.1 | 7.2             | 37.9 | 6.5            | NR                              | 100.0      | NR           |
|                       | Diet plus exercise                                                                          | 15         | 15                                          |             | 56.1 | 6.4             | 38.2 | 6.6            | NR                              |            | NR           |
| Wing 1991             | Behavior therapy alone                                                                      | 19         | 16                                          | 75.0        | 51.9 | 9.9             | 38.1 | 5.7            | NR                              | 100.0      | NR           |
|                       | Behavior therapy plus VLCD                                                                  | 17         | 17                                          | 76.4        | 50.6 | 7.7             | 37.3 | 4.7            | NR                              | 100.0      | NR           |
| Wing 1996             | Standard Behavioral Treatment (SBT)                                                         | 40         | 40                                          | 100         | 40.5 | 8.2             | 32.1 | 2.5            | NR                              | NR         | NR           |
|                       | SBT plus structured meal plans and grocery lists (menu)                                     | 41         | 41                                          |             | 41.7 | 7.7             | 32.8 | 2.2            | NR                              | NR         | NR           |

| Study ID         | Groups:                                                                                                      | Randomised | Number of participants reported at baseline | Gender (%F) | Age   |                    | BMI   |                            | Comorbidities at baseline (%) * |            |              |
|------------------|--------------------------------------------------------------------------------------------------------------|------------|---------------------------------------------|-------------|-------|--------------------|-------|----------------------------|---------------------------------|------------|--------------|
|                  |                                                                                                              |            |                                             |             | Mean  | SD                 | Mean  | SD                         | CV morbidity                    | Type II DM | Hypertension |
|                  | SBT plus structured meal plans plus food provision with participants sharing the cost of the food (Buy food) | 41         | 41                                          |             | 40.8  | 6.7                | 32    | 2.5                        | NR                              | NR         | NR           |
|                  | SBT plus structured meal plans plus food provision with the food provided free (free food)                   | 41         | 41                                          |             | 41.9  | 7.1                | 32.1  | 2.1                        | NR                              | NR         | NR           |
| Wing 1998        | Control                                                                                                      | 40         | 40                                          | 80          | 45.3  | 4.9                | 36.0  | 5.4                        | NR                              | 0.0        | NR           |
|                  | Diet                                                                                                         | 37         | 37                                          | 78          | 45.0  | 4.7                | 36.1  | 4.1                        | NR                              | 0.0        | NR           |
|                  | Exercise                                                                                                     | 37         | 37                                          | 81          | 46.4  | 4.5                | 36    | 3.7                        | NR                              | 0.0        | NR           |
|                  | Diet plus exercise                                                                                           | 40         | 40                                          | 77          | 46.3  | 3.8                | 35.7  | 4.1                        | NR                              | 0.0        | NR           |
| Wing 2003        | No break group (control)                                                                                     | 48         | 142                                         | 84.5        | 42.6  | 9.3                | 33.1  | 3.3                        | NR                              | NR         | NR           |
|                  | Long break group                                                                                             | 47         |                                             |             |       |                    |       |                            | NR                              | NR         | NR           |
|                  | Short break group                                                                                            | 47         |                                             |             |       |                    |       |                            | NR                              | NR         | NR           |
| Wing 2010        | Structured Education Program                                                                                 | 112        | 112                                         | 100         | 53    | 10                 | 36    | 5                          | NR                              | 0.9        | NR           |
|                  | Weight Loss Intervention (Skills Based maintenance)                                                          | 113        | 113                                         | 100         | 52    | 10                 | 37    | 6                          | NR                              | NR         | NR           |
|                  | Weight Loss Intervention (Motivation Based maintenance)                                                      | 113        | 113                                         | 100         | 53    | 11                 | 36    | 5                          | NR                              | NR         | NR           |
| Yannakoulia 2008 | Usual care group                                                                                             | 15         | 15                                          | 53.3        | 56.9  | 10                 | 31.6  | 5                          | NR                              | 100        | NR           |
|                  | Intensive care group                                                                                         | 15         | 15                                          | 40.0        | 56.3  | 8.8                | 32.2  | 4.1                        | NR                              | 100        | NR           |
| Yardley 2014     | Usual care                                                                                                   | 43         | 43                                          | 65.1        | 49.9  | 13.8               | 36.2  | 4.9                        | NR                              | NR         | NR           |
|                  | Web-based only                                                                                               | 45         | 45                                          | 68.9        | 51.2  | 13.9               | 34.8  | 4.4                        | NR                              | NR         | NR           |
|                  | Basic nurse support                                                                                          | 44         | 44                                          | 65.9        | 51.4  | 13.0               | 36.4  | 6.5                        | NR                              | NR         | NR           |
|                  | Regular nurse support                                                                                        | 47         | 47                                          | 63.8        | 52.1  | 12.7               | 35.4  | 6.0                        | NR                              | NR         | NR           |
| Yates 2009       | Control group                                                                                                | 34         | 29                                          | 41          | 65    | 10                 | 29.8  | 4.4                        | NR                              | NR         | NR           |
|                  | PREPARE group                                                                                                | 31         | 29                                          | 31          | 64    | 7                  | 29.5  | 4.9                        | NR                              | NR         | NR           |
|                  | PREPARE with pedometer                                                                                       | 33         | 29                                          | 31          | 66    | 8                  | 28.7  | 4.8                        | NR                              | NR         | NR           |
| Yates 2018       | Placebo + no lifestyle                                                                                       | 8          | 8                                           | 100         | 60    | 4.5                | 36.7  | 5.5                        | 3.4                             | NR         | 50.0         |
|                  | Metformin + no lifestyle (N/A)                                                                               | 7          | 7                                           |             | N/A   | N/A                | N/A   | N/A                        |                                 | N/A        | N/A          |
|                  | Placebo + lifestyle                                                                                          | 7          | 7                                           |             | 57.1  | 3.3                | 39.7  | 5.1                        |                                 | NR         | 28.6         |
|                  | Metformin + lifestyle (N/A)                                                                                  | 7          | 7                                           |             | N/A   | N/A                | N/A   | N/A                        |                                 | N/A        | N/A          |
| Yeh 2003         | Counseling based intervention                                                                                | 40         | 37                                          | 100         | 51    | 11                 | 36.3  | 5.4                        | NR                              | 0.0        | NR           |
|                  | Skills based intervention                                                                                    | 40         | 35                                          | 100         | 48    | 9                  | 37.9  | 6.7                        | NR                              | 0.0        | NR           |
| Yeh 2016         | Control group                                                                                                | 30         | 30                                          | 50          | 60.9  | 12.2               | 25.8  | 2.3                        | NR                              | NR         | NR           |
|                  | Intervention group                                                                                           | 30         | 30                                          | 63.3        | 56.8  | 9.5                | 26.3  | 2.4                        | NR                              | NR         | NR           |
| Yin 2018         | Comparison-Control Group                                                                                     | 75         | 75                                          | 100         | 53.27 | 7.17               | 27.43 | 2.75                       | NR                              | NR         | 24.0         |
|                  | Intervention Group                                                                                           | 109        | 109                                         | 100         | 51.06 | 7.15               | 27.42 | 2.91                       | NR                              | NR         | 27.5         |
| Zhang 2016       | Control                                                                                                      | 74         | 74                                          | 62.2        | 54    | 6.8                | 28    | 2.7                        | NR                              | NR         | NR           |
|                  | Moderate exercise                                                                                            | 73         | 73                                          | 69.9        | 54.4  | 7.4                | 28.1  | 3.3                        | NR                              | NR         | NR           |
|                  | Vigorous-moderate exercise                                                                                   | 73         | 73                                          | 71.2        | 53.2  | 7.1                | 27.9  | 2.7                        | NR                              | NR         | NR           |
| Zwickert 2016    | CBT + Minimal                                                                                                | 29         | 29                                          | 71.6        | 44.3  | 19-64 <sup>c</sup> | 37.5  | 30.4—<br>54.8 <sup>c</sup> | NR                              | NR         | NR           |
|                  | CBT + Intensive                                                                                              | 31         | 31                                          |             |       |                    |       |                            | NR                              | NR         | NR           |

| Study ID                                                                                                                                                                                                                                                                                                                                                                                                                                                                         | Groups: | Randomised | Number of participants reported at baseline | Gender (%F) | Age  |    | BMI  |    | Comorbidities at baseline (%) * |            |              |
|----------------------------------------------------------------------------------------------------------------------------------------------------------------------------------------------------------------------------------------------------------------------------------------------------------------------------------------------------------------------------------------------------------------------------------------------------------------------------------|---------|------------|---------------------------------------------|-------------|------|----|------|----|---------------------------------|------------|--------------|
|                                                                                                                                                                                                                                                                                                                                                                                                                                                                                  |         |            |                                             |             | Mean | SD | Mean | SD | CV morbidity                    | Type II DM | Hypertension |
| <b>CBT:</b> Cognitive Behaviour Therapy; <b>CV</b> = Cardiovascular; <b>DM:</b> Diabetes Mellitus; <b>DPP:</b> Diabetes Prevention Program; <b>N/A</b> = Not applicable; <b>NR</b> = Not reported; <b>VLCD:</b> Very low calorie diet<br>* Comorbidity definitions varied for each study; #Unclear whether DM percentage listed includes Type II and Type I<br><sup>a</sup> Median (IQR); <sup>b</sup> Standard error; <sup>c</sup> Range; <sup>d</sup> 95% Confidence intervals |         |            |                                             |             |      |    |      |    |                                 |            |              |

**Table 5. Intervention characteristics**

| Study ID       | Groups:                          | Intervention type | Intervention faded in intensity | Features (meal replacements, nutrition education, financial incentives, intermittent fasting, content designed to help participants following programme end) | Provider <sup>a</sup> | Provider training received | Delivery                               |                     | Intervention setting | Intervention timing (months) |                                | Sessions       |                   |                                                                                                                                                                                                                                                                          | Intervention personalised, titrated or adapted |
|----------------|----------------------------------|-------------------|---------------------------------|--------------------------------------------------------------------------------------------------------------------------------------------------------------|-----------------------|----------------------------|----------------------------------------|---------------------|----------------------|------------------------------|--------------------------------|----------------|-------------------|--------------------------------------------------------------------------------------------------------------------------------------------------------------------------------------------------------------------------------------------------------------------------|------------------------------------------------|
|                |                                  |                   |                                 |                                                                                                                                                              |                       |                            | Mode                                   | Format              |                      | Last contact                 | End (step change in intensity) | N <sup>c</sup> | Frequency         | Length per session with description for varying lengths. (minutes <sup>b</sup> )                                                                                                                                                                                         |                                                |
| Abed 2013      | Control                          | Control           | No                              | Nutrition Edu.; Help following programme end                                                                                                                 |                       | No                         |                                        |                     | Health Care          |                              |                                | 0              |                   |                                                                                                                                                                                                                                                                          | No                                             |
|                | Weight Management                | Diet and exercise | Yes                             | MR-P; Nutrition Edu.; Help following programme end                                                                                                           | Physician             | No                         | Individual                             | Face to Face; Print | Health Care          | 15                           | 2                              | 5              | Every 3 months    | 20 - 40 mins; Additional goal-directed face-to-face clinic visits were scheduled as required; 8 weeks VLCD. 3m to 15m low GI meals. Exercise plan of increasing intensity. Exercise 3 per week for 15 months; 24-hour e-mail and telephone support provided as required. | Yes                                            |
| Ackermann 2011 | Standard advice alone (controls) | Diet and exercise | No                              | Nutrition Edu.                                                                                                                                               |                       |                            | Individual                             | Face to Face        | Community            | 0                            | 0                              | 1              | Once              | 5                                                                                                                                                                                                                                                                        | Yes                                            |
|                | YMCA DPP intervention            | Diet and exercise | No                              | Nutrition Edu.                                                                                                                                               |                       |                            | Individual and Group                   | Face to Face        | Community            | 5                            | 5                              | 16             | Weekly            | 60 – 90                                                                                                                                                                                                                                                                  | Yes                                            |
| Agras 1990     | Computer alone                   | Diet and exercise | No                              | Fin. Incentives                                                                                                                                              |                       | No                         | Other - remote, plus one group session | Other               | Home                 | 3                            | 3                              |                | Daily             | N/A as computer which they had on them at all times                                                                                                                                                                                                                      | Yes                                            |
|                | Computer + group support         | Diet and exercise | Yes                             | Fin. Incentives                                                                                                                                              |                       | Unclear                    | Other - computer                       | Face to Face; Other | Community; Home      | 3                            | 3                              | 4              | Every second week | 2, 4, 6 and 8 weeks                                                                                                                                                                                                                                                      | Yes                                            |

| Study ID                 | Groups:                                        | Intervention type | Intervention faded in intensity | Features<br>(meal replacements, nutrition education, financial incentives, intermittent fasting, content designed to help participants following programme end) | Provider <sup>a</sup>    | Provider training received | Delivery          |                        | Intervention setting | Intervention timing (months) |                                | Sessions       |                                    |                                                                                                             | Intervention personalized, titrated or adapted |
|--------------------------|------------------------------------------------|-------------------|---------------------------------|-----------------------------------------------------------------------------------------------------------------------------------------------------------------|--------------------------|----------------------------|-------------------|------------------------|----------------------|------------------------------|--------------------------------|----------------|------------------------------------|-------------------------------------------------------------------------------------------------------------|------------------------------------------------|
|                          |                                                |                   |                                 |                                                                                                                                                                 |                          |                            | Mode              | Format                 |                      | Last contact                 | End (step change in intensity) | N <sup>c</sup> | Frequency                          | Length per session with description for varying lengths. (minutes <sup>b</sup> )                            |                                                |
|                          |                                                |                   |                                 |                                                                                                                                                                 |                          |                            | and group support |                        |                      |                              |                                |                |                                    |                                                                                                             |                                                |
|                          | Behaviour therapy                              | Diet and exercise | No                              | Fin. Incentives                                                                                                                                                 |                          | No                         | Group             | Face to Face           | Community            | 3                            | 3                              | 10             | Approx. weekly                     | 10 sessions over 12 weeks                                                                                   | No                                             |
| Ahern 2017               | Brief intervention                             | Control           | No                              | Nutrition Edu.                                                                                                                                                  | Other                    | Unclear                    | Individual        | Face to Face; Print    | Community            | 1                            | 1                              | 1              | Once                               |                                                                                                             | No                                             |
|                          | 12-week behavioural weight-loss programme      | Diet and exercise | No                              | Nutrition Edu.                                                                                                                                                  | Health Trainer           | Yes                        | Group             | Face to Face; Internet | Community            | 12                           | 12                             | 12             | Weekly                             | 30                                                                                                          | No                                             |
|                          | 52-week behavioural weight-loss programme      | Diet and exercise | No                              | Nutrition Edu.                                                                                                                                                  | Health Trainer           | Yes                        | Group             | Face to Face; Internet | Community            | 52                           | 52                             | 52             | Weekly                             | 30                                                                                                          | No                                             |
| Almanza - Aguiler a 2018 | Control (general recommendations)              | Control           | No                              | Nutrition Edu.                                                                                                                                                  | Nutritionist             | No                         | Unclear           | Face to Face; Other    |                      | 12                           |                                | 2              | 3m, 12m                            |                                                                                                             | No                                             |
|                          | Treatment (lifestyle weight loss intervention) | Diet and exercise | No                              | Nutrition Edu.                                                                                                                                                  | Nutritionist             | No                         | Unclear           | Face to Face; Other    |                      | 12                           | 3                              | 13             | Weekly (0-3m); Once at 12m         |                                                                                                             | No                                             |
| Ames 2005                | Standard behavioural treatment                 | Diet and exercise | No                              | Nutrition Edu.                                                                                                                                                  | Psychologist/ Counsellor | No                         | Group             | Face to Face           |                      | 12                           | 6                              | 20             | Approx. weekly (20 sessions in 6m) |                                                                                                             | No                                             |
|                          | Reformulated cognitive-behavioural treatment   | Diet and exercise | No                              | Nutrition Edu.; Help following programme end                                                                                                                    | Psychologist/ Counsellor | No                         | Group             | Face to Face           |                      | 12                           | 6                              | 20             | Approx. weekly (20 sessions in 6m) |                                                                                                             | No                                             |
| Andersen 1999            | Diet + Lifestyle Activity                      | Diet and exercise | No                              | Nutrition Edu.; Help following programme end                                                                                                                    | Psychologist/ Counsellor | No                         | Group             | Face to Face; Other    | Community            | 17                           | 4                              | 16             | Weekly                             | Cognitive behavioural sessions = 60 mins. Advised 30 mins moderate physical activity on most days per week. | No                                             |

| Study ID       | Groups:                            | Intervention type | Intervention faded in intensity | Features<br>(meal replacements, nutrition education, financial incentives, intermittent fasting, content designed to help participants following programme end) | Provider <sup>a</sup>    | Provider training received | Delivery             |                                | Intervention setting | Intervention timing (months) |                                | Sessions       |                                                                               |                                                                                                                                                         | Intervention personalised, titrated or adapted |
|----------------|------------------------------------|-------------------|---------------------------------|-----------------------------------------------------------------------------------------------------------------------------------------------------------------|--------------------------|----------------------------|----------------------|--------------------------------|----------------------|------------------------------|--------------------------------|----------------|-------------------------------------------------------------------------------|---------------------------------------------------------------------------------------------------------------------------------------------------------|------------------------------------------------|
|                |                                    |                   |                                 |                                                                                                                                                                 |                          |                            | Mode                 | Format                         |                      | Last contact                 | End (step change in intensity) | N <sup>c</sup> | Frequency                                                                     | Length per session with description for varying lengths. (minutes <sup>b</sup> )                                                                        |                                                |
|                | Diet + Aerobic Group               | Diet and exercise | No                              | Nutrition Edu.; Help following programme end                                                                                                                    | Other                    | No                         | Group                | Face to Face                   | Community            | 17                           | 4                              | 64             | Weekly cognitive behavioural session + aerobic session 3 x per week           | Cognitive behavioural sessions = 60 mins. Aerobics classes: 5-10 min warm up, 15-45 mins aerobic phase (increased by 4 mins per week), 5 min cool-down. | Yes                                            |
| Anders on 2014 | Control (weight loss booklet only) | Control           | No                              | Nutrition Edu.; Help following programme end                                                                                                                    |                          | No                         | Individual           | Print                          | Home                 | 12                           | 12                             | 0              |                                                                               |                                                                                                                                                         | No                                             |
|                | Intervention (BeWEL)               | Diet and exercise | Yes                             | Nutrition Edu.; Help following programme end                                                                                                                    | Psychologist/ Counsellor | No                         | Individual           | Face to Face; Telephone; Print | Health Care; Home    | 3                            | 12                             | 12             | Monthly                                                                       | The 3 counsellor sessions were each 1 hour. The 9 phone calls were each 15 minutes.                                                                     | Yes                                            |
| Annesi 2016    | Comparison treatment               | Diet and exercise | No                              | Nutrition Edu.                                                                                                                                                  |                          | Yes                        | Individual           | Telephone; Print               | Community            | 24                           | 6                              | 12             | Every 2 weeks                                                                 | 15                                                                                                                                                      | Yes                                            |
|                | Experimental treatment             | Diet and exercise | No                              | Nutrition Edu.; Help following programme end                                                                                                                    | Psychologist/ Counsellor | Yes                        | Individual and Group | Face to Face; Internet         | Community            | 24                           | 6.5                            | 32             | Exercise support sessions: over 6.5 months; Nutrition sessions: every 2 weeks | Six 45-minute individual exercise meetings; 10 nutrition sessions of 60 minutes                                                                         | Yes                                            |
| Annesi 2017    | Control comparison group           | Diet and exercise | No                              | Nutrition Edu.; Inter. Fasting                                                                                                                                  |                          | Yes                        | Individual           | Telephone; Print               | Community            | 6                            | 6                              | 17             | Every second week (24 weeks in total)                                         | Lesson followed by 15 min phone conversation                                                                                                            | Yes                                            |
|                | Experimental group                 | Diet and exercise | Yes                             | Nutrition Edu.; Help following programme end                                                                                                                    | Health Trainer           | Yes                        | Individual and Group | Face to Face                   | Community            | 12                           | 6                              | 35             | Monthly 1:1 for 6m. Biweekly from weeks 10-52                                 | 45 mins for 1:1 sessions; Group length not stated                                                                                                       | Yes                                            |
| Appel 2011     | Control (Self-directed)            | Control           | No                              | Nutrition Edu.                                                                                                                                                  | Health Trainer           | Unclear                    | Individual           | Face to Face; Print            | Health Care          |                              |                                | 1              | 0, 24m                                                                        |                                                                                                                                                         |                                                |

| Study ID | Groups:                                      | Intervention type | Intervention faded in intensity | Features<br>(meal replacements, nutrition education, financial incentives, intermittent fasting, content designed to help participants following programme end) | Provider <sup>a</sup>      | Provider training received | Delivery             |                                          | Intervention setting   | Intervention timing (months) |                                | Sessions       |                                                                                                                    |                                                                                  | Intervention personalised, titrated or adapted |
|----------|----------------------------------------------|-------------------|---------------------------------|-----------------------------------------------------------------------------------------------------------------------------------------------------------------|----------------------------|----------------------------|----------------------|------------------------------------------|------------------------|------------------------------|--------------------------------|----------------|--------------------------------------------------------------------------------------------------------------------|----------------------------------------------------------------------------------|------------------------------------------------|
|          |                                              |                   |                                 |                                                                                                                                                                 |                            |                            | Mode                 | Format                                   |                        | Last contact                 | End (step change in intensity) | N <sup>c</sup> | Frequency                                                                                                          | Length per session with description for varying lengths. (minutes <sup>b</sup> ) |                                                |
|          | Remote Support Only (N/A)                    | N/A               | N/A                             | N/A                                                                                                                                                             | N/A                        | N/A                        | N/A                  | N/A                                      | N/A                    | N/A                          | N/A                            | N/A            | N/A                                                                                                                | N/A                                                                              | N/A                                            |
|          | In-Person Support                            | Diet and exercise | Yes                             | Nutrition Edu.                                                                                                                                                  | Other AHPs; Health Trainer | Yes                        | Individual and Group | Face to Face; Telephone; Internet; Other | Health Care            | 24                           | 6                              | 57             | Weekly (0-3m); Three monthly contacts over the next 3 months; Two monthly contacts for the remainder of the study. | Individual sessions approx. 20 mins; In-person group sessions: 90 mins           | Yes                                            |
| Ard 2004 | “advice only” comparison group               | Diet and exercise | No                              | Nutrition Edu.                                                                                                                                                  | Dietitian                  | No                         | Individual           | Face to Face; Print;                     | Health Care            | 6                            | 6                              | 2              |                                                                                                                    | 30                                                                               | Yes                                            |
|          | “established” behavioural intervention group | Diet and exercise | Yes                             | Nutrition Edu.; Help following programme end                                                                                                                    |                            |                            | Individual and Group | Face to Face                             | Health Care            | 18                           | 6                              | 23             | Weekly (3m), Biweekly (3m), Monthly (12m)                                                                          |                                                                                  | Yes                                            |
|          | Established + DASH Intervention Group        | Diet and exercise | Yes                             | Nutrition Edu.; Help following programme end                                                                                                                    |                            |                            | Individual and Group | Face to Face                             | Health Care            | 18                           | 6                              | 23             | Weekly (3m), Biweekly (3m), Monthly (12m)                                                                          |                                                                                  | Yes                                            |
| Ard 2018 | Exercise Only                                | Exercise only     | No                              |                                                                                                                                                                 |                            | Unclear                    | Group                | Face to Face; Print                      | Community              | 12                           | 6                              | 38             | Weekly 0-24 weeks and then biweekly until 12m                                                                      | 1 hour                                                                           | No                                             |
|          | Exercise + Diet Quality + Weight Maintenance | Diet and exercise | No                              | Nutrition Edu.                                                                                                                                                  |                            | Unclear                    | Group                | Face to Face; Print;                     | Community              | 12                           | 6                              | 38             | Weekly 0-24 weeks and then biweekly until 12m                                                                      | 1 hour                                                                           | No                                             |
|          | Exercise + Diet Quality + Weight Loss        | Diet and exercise | No                              | Nutrition Edu.                                                                                                                                                  |                            | Unclear                    | Group                | Face to Face; Print                      | Community              | 12                           | 6                              | 38             | Weekly 0-24 weeks and then biweekly until 12 m                                                                     | 1 hour                                                                           | No                                             |
| Ash 2006 | Control Group - Booklet only                 | Control           | No                              | Nutrition Edu.                                                                                                                                                  |                            | Yes                        | Other – booklet only | Print                                    | Community              |                              |                                | 0              |                                                                                                                    |                                                                                  | No                                             |
|          | Individualised Dietetic Treatment            | Diet and exercise | Yes                             | Nutrition Edu.                                                                                                                                                  | Dietitian                  | Yes                        | Individual           | Face to Face;                            | Health Care; Community | 6                            | 2                              | 12             | Weekly for 8 weeks, monthly from week 8 until 6m.                                                                  | 1 hour initial individual consultation,                                          | Yes                                            |



| Study ID     | Groups:                               | Intervention type | Intervention faded in intensity | Features<br>(meal replacements, nutrition education, financial incentives, intermittent fasting, content designed to help participants following programme end) | Provider <sup>a</sup>      | Provider training received | Delivery             |                                | Intervention setting   | Intervention timing (months) |                                | Sessions       |                                                                         |                                                                                     | Intervention personalized, titrated or adapted |
|--------------|---------------------------------------|-------------------|---------------------------------|-----------------------------------------------------------------------------------------------------------------------------------------------------------------|----------------------------|----------------------------|----------------------|--------------------------------|------------------------|------------------------------|--------------------------------|----------------|-------------------------------------------------------------------------|-------------------------------------------------------------------------------------|------------------------------------------------|
|              |                                       |                   |                                 |                                                                                                                                                                 |                            |                            | Mode                 | Format                         |                        | Last contact                 | End (step change in intensity) | N <sup>c</sup> | Frequency                                                               | Length per session with description for varying lengths. (minutes <sup>b</sup> )    |                                                |
|              |                                       |                   |                                 |                                                                                                                                                                 |                            |                            |                      | Telephone; Print               |                        |                              |                                |                |                                                                         | followed by seven 20-min weekly review sessions and four monthly follow-up sessions |                                                |
|              | Fat Booters Incorporated              | Diet and exercise | Yes                             | Nutrition Edu.; Help following programme end                                                                                                                    | Dietitian; Nutritionist    | Yes                        | Group                | Face to Face; Telephone; Print | Health Care; Community | 6                            | 2                              | 11             | Weekly for 6 weeks with monthly follow up until 6m.                     | 1.5 hrs for 6 sessions. Not stated for 5 follow up visits.                          | No                                             |
| Ashley 2001  | Control, Diet                         | Diet and exercise | Yes                             | Nutrition Edu.; Help following programme end                                                                                                                    | Dietitian                  | Unclear                    | Group                | Face to Face; Print            | Community              | 24                           | 12                             | 37             | Year 1: weekly for 3m, biweekly for 3m, monthly for 6m. Year 2: monthly | 60                                                                                  | No                                             |
|              | MR - Physician/Nurse led              | Diet and exercise | Yes                             | MR-P; Nutrition Edu.; Help following programme end                                                                                                              | Nurse (General); Physician | Unclear                    | Group                | Face to Face; Print            | Community              | 24                           | 12                             | 37             | Year 1: every other week. Year 2: monthly                               | 15                                                                                  | Yes                                            |
|              | MR - Dietician lead                   | Diet and exercise | Yes                             | MR-P; Nutrition Edu.; Help following programme end                                                                                                              | Dietitian                  | Unclear                    | Group                | Face to Face; Print            | Community              | 24                           | 12                             | 37             | Year 1: weekly for 3m, biweekly for 3m, monthly for 6m. Year 2: monthly | 60                                                                                  | Yes                                            |
| Ashley 2007  | Control, TFG - Traditional Food Group | Diet only         | Yes                             | Nutrition Edu.                                                                                                                                                  | Dietitian                  | Yes                        | Group                | Face to Face; Print            | Community              | 12                           | 6                              | 18             | 0- 6m: 2 x per month<br>6-12m: monthly                                  |                                                                                     | Yes                                            |
|              | MRG - Meal Replacement Group          | Diet only         | Yes                             | MR-P; Nutrition Edu.                                                                                                                                            | Dietitian                  | Yes                        | Group                | Face to Face; Print            | Community              | 12                           | 6                              | 18             | 0- 6m: 2 x per month<br>6-12m: monthly                                  |                                                                                     | Yes                                            |
| Aveyard 2016 | Advice only                           | Control           | No                              |                                                                                                                                                                 | GP                         | Yes                        | Individual           | Face to Face                   | Health Care            | 0                            | 0                              | 1              |                                                                         | 30 seconds                                                                          | No                                             |
|              | Advice plus weight loss programme     | Diet and exercise | No                              | Nutrition Edu.                                                                                                                                                  | GP; Health Trainer         | Yes                        | Individual           | Face to Face                   | Health Care; Community | 3                            | 3                              | 12             | Weekly                                                                  | 60                                                                                  | No                                             |
| Azar 2013    | Control, Usual care                   | Control           | No                              |                                                                                                                                                                 |                            |                            | Unclear              | Face to Face                   | Community              |                              |                                | 4              |                                                                         |                                                                                     | No                                             |
|              | Self-directed                         | Diet and exercise | Yes                             | Nutrition Edu.                                                                                                                                                  | Dietitian                  |                            | Individual and Group | Face to Face; Internet; Other  | Home                   | 15                           | 3                              | 40             |                                                                         |                                                                                     | Yes                                            |

| Study ID     | Groups:                           | Intervention type | Intervention faded in intensity | Features<br>(meal replacements, nutrition education, financial incentives, intermittent fasting, content designed to help participants following programme end) | Provider <sup>a</sup>                     | Provider training received | Delivery             |                                     | Intervention setting | Intervention timing (months) |                                | Sessions       |                                                                                                     |                                                                                  | Intervention personalised, titrated or adapted |
|--------------|-----------------------------------|-------------------|---------------------------------|-----------------------------------------------------------------------------------------------------------------------------------------------------------------|-------------------------------------------|----------------------------|----------------------|-------------------------------------|----------------------|------------------------------|--------------------------------|----------------|-----------------------------------------------------------------------------------------------------|----------------------------------------------------------------------------------|------------------------------------------------|
|              |                                   |                   |                                 |                                                                                                                                                                 |                                           |                            | Mode                 | Format                              |                      | Last contact                 | End (step change in intensity) | N <sup>c</sup> | Frequency                                                                                           | Length per session with description for varying lengths. (minutes <sup>b</sup> ) |                                                |
|              | Coach-led                         | Diet and exercise | Yes                             | Nutrition Edu.                                                                                                                                                  | Psychologist/<br>Counsellor;<br>Dietitian |                            | Individual and Group | Face to Face                        | Community            | 15                           | 3                              | 52             | Weekly                                                                                              | 90 – 120                                                                         | Yes                                            |
| Bacon 2002   | Health at Every Size - control    | Diet and exercise | No                              | Nutrition Edu.                                                                                                                                                  | Psychologist/<br>Counsellor               |                            | Group                | Face to Face                        | Community            | 12                           | 6                              | 30             | Weekly for first 6m, then monthly                                                                   | 1.5 hour                                                                         | No                                             |
|              | Diet Group - intervention         | Diet and exercise | No                              | Nutrition Edu.                                                                                                                                                  | Dietitian                                 |                            | Group                | Face to Face                        | Community            | 12                           | 6                              | 30             | Weekly for first 6m, then monthly                                                                   | 1.5 hour                                                                         | No                                             |
| Barnes 2017  | Treatment as usual (N/A)          | Control           | N/A                             | N/A                                                                                                                                                             | N/A                                       | N/A                        | N/A                  | N/A                                 | N/A                  | N/A                          | N/A                            | N/A            | N/A                                                                                                 | N/A                                                                              | N/A                                            |
|              | Nutrition - ATTENTION CONTROL     | Diet only         | No                              | Nutrition Edu.                                                                                                                                                  | Other AHPs                                |                            | Individual           | Face to Face<br>Internet;<br>Print  | Community            | 3                            | 3                              | 5              | Every 3 weeks                                                                                       | 60 mins the first session and 20 mins the rest (4 sessions)                      |                                                |
|              | Motivational interviewing         | Diet and exercise | No                              | Nutrition Edu.                                                                                                                                                  |                                           |                            | Individual           | Face to Face;<br>Internet;<br>Print | Community            | 3                            | 3                              | 5              | Every 3 weeks                                                                                       | 60 mins the first session and 20 mins the rest (4 sessions)                      |                                                |
| Bartels 2015 | Control, Fitness club membership  | Exercise only     | No                              |                                                                                                                                                                 |                                           | No                         | Individual           | Face to Face                        | Community            |                              |                                | 1              |                                                                                                     |                                                                                  | No                                             |
|              | IN SHAPE                          | Diet and exercise | No                              | Nutrition Edu.                                                                                                                                                  | Health Trainer;<br>Personal Trainer       | Yes                        | Individual           | Face to Face                        | Community            | 12                           | 12                             | 52             | Weekly                                                                                              | 45 – 60                                                                          | Yes                                            |
| Beavers 2017 | Weight loss                       | Diet only         | Yes                             | Nutrition Edu.; Help following programme end                                                                                                                    |                                           | Yes                        | Individual and Group | Face to Face                        | Community            | 18                           | 6                              | 48             | 4/m (1-6m);<br>3/m (7-12m);<br>1/m (12-18m)                                                         | 60                                                                               | Yes                                            |
|              | Weight loss + Aerobic training    | Diet and exercise | Yes                             | Nutrition Edu.; Help following programme end                                                                                                                    |                                           | Yes                        | Individual and Group | Face to Face                        | Community            | 18                           | 6                              | 312            | 4/month (1-6m)<br>3/Month (7-12m);<br>1/Month (12-18m);<br>4 days/week<br>exercise sessions (1-18m) | 60 minutes WL sessions; 45 exercise sessions                                     | Yes                                            |
|              | Weight loss + Resistance training | Diet and exercise | Yes                             | Nutrition Edu.; Help following programme end                                                                                                                    |                                           | Yes                        | Individual and Group | Face to Face                        | Community            | 18                           | 6                              | 312            | 4/month (1-6m);<br>3/Month (7-12m);<br>1/Month (12-18m);<br>4 days/week                             | 60 minutes WL sessions; 45 exercise sessions                                     | Yes                                            |

| Study ID     | Groups:                    | Intervention type | Intervention faded in intensity | Features<br>(meal replacements, nutrition education, financial incentives, intermittent fasting, content designed to help participants following programme end) | Provider <sup>a</sup>                    | Provider training received | Delivery             |                                | Intervention setting   | Intervention timing (months)                                       |                                | Sessions       |                                                                                                             |                                                                                  | Intervention personalized, titrated or adapted |
|--------------|----------------------------|-------------------|---------------------------------|-----------------------------------------------------------------------------------------------------------------------------------------------------------------|------------------------------------------|----------------------------|----------------------|--------------------------------|------------------------|--------------------------------------------------------------------|--------------------------------|----------------|-------------------------------------------------------------------------------------------------------------|----------------------------------------------------------------------------------|------------------------------------------------|
|              |                            |                   |                                 |                                                                                                                                                                 |                                          |                            | Mode                 | Format                         |                        | Last contact                                                       | End (step change in intensity) | N <sup>c</sup> | Frequency                                                                                                   | Length per session with description for varying lengths. (minutes <sup>b</sup> ) |                                                |
|              |                            |                   |                                 |                                                                                                                                                                 |                                          |                            |                      |                                |                        |                                                                    |                                |                | exercises sessions (1-18m)                                                                                  |                                                                                  |                                                |
| Beeken 2017  | Usual care                 | Diet and exercise | No                              | Nutrition Edu.                                                                                                                                                  | Health care professional (not specified) | No                         | Individual and Group | Other                          | Health Care; Community | Varied (12 weeks, min. 2 appts, 12 weekly sessions, monthly appts) | varied                         | Varied         |                                                                                                             |                                                                                  | Yes                                            |
|              | 10TT                       | Diet and exercise | No                              | Nutrition Edu.; Help following programme end                                                                                                                    | Nurse (General)                          | Yes                        | Unclear              | Face to Face; Telephone; Print | Health Care            | 3                                                                  | 3                              | 1              | Single session                                                                                              | 30                                                                               | No                                             |
| Bennett 1986 | Group Contact Control      | Diet only         | Yes                             | Nutrition Edu.                                                                                                                                                  | Psychologist/ Counsellor; Dietitian      | Unclear                    | Individual and Group | Face to Face                   | Community              | 4                                                                  | 4                              | 6              | Group sessions in weeks 1, 2, 3, 10, 15; individual sessions week 16;                                       |                                                                                  | Yes                                            |
|              | Individual Contact Control | Diet only         | Yes                             | Nutrition Edu.                                                                                                                                                  | Psychologist/ Counsellor; Dietitian      | Unclear                    | Individual and Group | Face to Face                   | Community              | 4                                                                  | 4                              | 13             | Group sessions in weeks 1, 2, 3, 10, 15; individual sessions (2 in weeks 4 and 5; one in weeks 6, 7, 9, 16) | Individual sessions (20 minutes). Group session: Not reported.                   | Yes                                            |
|              | Insight Control            | Diet only         | Yes                             | Nutrition Edu.                                                                                                                                                  | Psychologist/ Counsellor; Dietitian      | Unclear                    | Individual and Group | Face to Face                   | Community              | 4                                                                  | 4                              | 13             | Group sessions in weeks 1, 2, 3, 10, 15; individual sessions (2 in weeks 4 and 5; one in weeks 6, 7, 9, 16) | Individual sessions (1 hour). Group session: Not reported.                       | Yes                                            |
|              | Cognitive Rehearsal        | Diet only         | Yes                             | Nutrition Edu.                                                                                                                                                  | Psychologist/ Counsellor; Dietitian      | Unclear                    | Individual and Group | Face to Face                   | Community              | 4                                                                  | 4                              | 13             | Group sessions in weeks 1, 2, 3, 10, 15; individual sessions (2 in weeks 4 and 5; one in weeks 6, 7, 9, 16) | Individual sessions (1 hour); Group session: Not reported.                       | Yes                                            |

| Study ID       | Groups:                                                          | Intervention type | Intervention faded in intensity | Features<br>(meal replacements, nutrition education, financial incentives, intermittent fasting, content designed to help participants following programme end) | Provider <sup>a</sup>                           | Provider training received | Delivery             |                                   | Intervention setting | Intervention timing (months) |                                | Sessions       |                                                                                                             |                                                                                                                                                                                | Intervention personalised, titrated or adapted |
|----------------|------------------------------------------------------------------|-------------------|---------------------------------|-----------------------------------------------------------------------------------------------------------------------------------------------------------------|-------------------------------------------------|----------------------------|----------------------|-----------------------------------|----------------------|------------------------------|--------------------------------|----------------|-------------------------------------------------------------------------------------------------------------|--------------------------------------------------------------------------------------------------------------------------------------------------------------------------------|------------------------------------------------|
|                |                                                                  |                   |                                 |                                                                                                                                                                 |                                                 |                            | Mode                 | Format                            |                      | Last contact                 | End (step change in intensity) | N <sup>c</sup> | Frequency                                                                                                   | Length per session with description for varying lengths. (minutes <sup>b</sup> )                                                                                               |                                                |
| Bennett 2012   | Control, Usual care                                              | Diet only         | No                              |                                                                                                                                                                 |                                                 | No                         | Other – Print only   | Print                             |                      |                              |                                |                |                                                                                                             |                                                                                                                                                                                | No                                             |
|                | Be Fit, Be Well                                                  | Diet and exercise | Yes                             | Nutrition Edu.                                                                                                                                                  | Health care professional (not specified)        | Yes                        | Individual and Group | Face to Face; Telephone; Internet | Community; Home      | 24                           | 12                             | 30             | Monthly for the first year and bimonthly for the second year. Additional 12 optional monthly group sessions | 15-20 mins; Telephone counselling sessions were held monthly for the first year and bimonthly for the second year. There were an additional 12 optional monthly group sessions | Yes                                            |
| Bennett 2013   | Control, usual care                                              | Control           | No                              |                                                                                                                                                                 |                                                 | No                         |                      |                                   |                      | 12                           |                                |                |                                                                                                             |                                                                                                                                                                                | No                                             |
|                | Weight gain prevention intervention                              | Diet and exercise | No                              | Nutrition Edu.                                                                                                                                                  |                                                 | Yes                        | Individual           | Telephone;                        | Community; Home      | 12                           | 12                             | 64             | Weekly (52) and monthly (12)                                                                                | 10 mins (52 weekly IVR (interactive voice response calls)) 12 monthly 20 min calls                                                                                             | Yes                                            |
| Berendsen 2011 | Standard combined lifestyle intervention                         | Diet and exercise | No                              | Nutrition Edu.                                                                                                                                                  | Nurse (General); GP; Dietitian; Physiotherapist | No                         | Individual and Group | Face to Face                      | Health Care; Home    | 12                           | 12                             | 22             |                                                                                                             |                                                                                                                                                                                | No                                             |
|                | Supervised combined lifestyle intervention                       | Diet and exercise | Yes                             | Nutrition Edu.                                                                                                                                                  | Nurse (General); GP; Dietitian Physiotherapist  | No                         | Individual and Group | Face to Face                      | Health Care; Home    | 12                           | 12                             | 56             |                                                                                                             |                                                                                                                                                                                | No                                             |
| Berry 2014     | Control                                                          | Control           | No                              |                                                                                                                                                                 |                                                 | No                         |                      |                                   |                      |                              |                                |                |                                                                                                             |                                                                                                                                                                                | No                                             |
|                | Family based. Nutrition, exercise and coping skills intervention | Diet and exercise | No                              | Nutrition Edu.                                                                                                                                                  | Nurse (General); Dietitian; Personal Trainer    | No                         | Group                | Face to Face                      | Community            | 12                           | 3                              | 21             | Weekly for 3m; Monthly until 12m                                                                            | Weekly for 12 weeks. 60 mins nutrition and exercise education and coping skills                                                                                                | No                                             |

| Study ID     | Groups:                   | Intervention type | Intervention faded in intensity | Features<br>(meal replacements, nutrition education, financial incentives, intermittent fasting, content designed to help participants following programme end) | Provider <sup>a</sup>               | Provider training received | Delivery             |                              | Intervention setting         | Intervention timing (months) |                                | Sessions       |                                                  |                                                                                     | Intervention personalised, titrated or adapted |
|--------------|---------------------------|-------------------|---------------------------------|-----------------------------------------------------------------------------------------------------------------------------------------------------------------|-------------------------------------|----------------------------|----------------------|------------------------------|------------------------------|------------------------------|--------------------------------|----------------|--------------------------------------------------|-------------------------------------------------------------------------------------|------------------------------------------------|
|              |                           |                   |                                 |                                                                                                                                                                 |                                     |                            | Mode                 | Format                       |                              | Last contact                 | End (step change in intensity) | N <sup>c</sup> | Frequency                                        | Length per session with description for varying lengths. (minutes <sup>b</sup> )    |                                                |
|              |                           |                   |                                 |                                                                                                                                                                 |                                     |                            |                      |                              |                              |                              |                                |                |                                                  | followed by 45 mins of exercise. Monthly for 9m 60 mins class and 45 mins exercise. |                                                |
| Bertram 1990 | Control - diet only       | Diet only         | No                              | Nutrition Edu.                                                                                                                                                  |                                     | No                         | Individual           | Print                        | Home                         | 4                            | 4                              | 0              |                                                  |                                                                                     | No                                             |
|              | Diet plus lectures        | Diet only         | No                              | Nutrition Edu.                                                                                                                                                  | Dietitian                           | No                         | Group                | Face to Face; Print          | Community                    | 4                            | 4                              | 16             | Weekly                                           | 1 hour                                                                              | No                                             |
|              | Diet plus exercise        | Diet and exercise | No                              | Nutrition Edu.                                                                                                                                                  | Personal Trainer                    | No                         | Group                | Face to Face; Print          | Community                    | 4                            | 4                              | 64             | 3 x per week                                     | 1 hour                                                                              | No                                             |
| Bertz 2012   | Control                   | Control           | No                              |                                                                                                                                                                 |                                     | No                         |                      |                              |                              |                              |                                |                |                                                  |                                                                                     | No                                             |
|              | Diet Only                 | Diet only         | No                              | Nutrition Edu.                                                                                                                                                  | Dietitian                           | No                         | Individual           | Face to Face; Telephone; SMS | Health Care; Community; Home | 3                            | 3                              | 2              | Week 0, 6                                        | 1.5 hrs at start of intervention, 1hr at week 6                                     | Yes                                            |
|              | Exercise only             | Exercise only     | No                              |                                                                                                                                                                 | Physiotherapist                     | No                         | Individual           | Face to Face; Telephone; SMS | Health Care; Community; Home | 3                            | 3                              | 2              | Week 0, 6                                        | 1.5 hours at start of intervention, 1 hour at week 6                                | No                                             |
|              | Intervention              | Diet and exercise | No                              | Nutrition Edu.                                                                                                                                                  | Dietitian; Physiotherapist          | No                         | Individual           | Face to Face; Telephone; SMS | Health Care; Community; Home | 3                            | 3                              | 4              | Week 0, 6                                        | 2 x 1.5 hours at start of intervention, 2 x 1 hour at week 6                        | Yes                                            |
| Beutel 2006  | Behavioural therapy       | Diet and exercise | No                              | Help following programme end                                                                                                                                    | Physician; Psychologist/ Counsellor | Yes                        | Group                | Face to Face                 | Inpatient                    | 1.5                          | 1.5                            |                |                                                  | 40                                                                                  | Yes                                            |
|              | Psychodynamic treatment   | Diet and exercise | No                              |                                                                                                                                                                 | Physician; Psychologist/ Counsellor | Yes                        | Individual and Group | Face to Face                 | Inpatient                    | 1.5                          | 1.5                            |                |                                                  | 40                                                                                  | Yes                                            |
| Bliddal 2011 | Control, low-energy diet  | Diet only         | Yes                             | Nutrition Edu.                                                                                                                                                  | Dietitian                           | Unclear                    | Group                | Face to Face                 | Community                    |                              |                                | 5              | Weeks: 0, 8, 32, 36, 52                          | 2 hours                                                                             | No                                             |
|              | Intensive low-energy diet | Diet only         | Yes                             | MR-F; Nutrition Edu.                                                                                                                                            | Dietitian                           | Unclear                    | Group                | Face to Face                 | Community; Home              | 12                           | 8.3                            | 44             | Baseline, weekly for 32 weeks then every 2 weeks | 1.5 hours                                                                           | No                                             |
| Bo 2007      | Control standard care     | Control           | No                              | Nutrition Edu.                                                                                                                                                  | GP                                  | Yes                        | Individual           | Face to Face                 | Health Care                  | 0                            |                                | 1              |                                                  |                                                                                     | No                                             |

| Study ID   | Groups:                                        | Intervention type | Intervention faded in intensity | Features<br>(meal replacements, nutrition education, financial incentives, intermittent fasting, content designed to help participants following programme end) | Provider <sup>a</sup>                         | Provider training received | Delivery             |                                 | Intervention setting   | Intervention timing (months) |                                | Sessions       |                                                                                                                 |                                                                                                                                                                                                                                                                                                                                     | Intervention personalised, titrated or adapted |
|------------|------------------------------------------------|-------------------|---------------------------------|-----------------------------------------------------------------------------------------------------------------------------------------------------------------|-----------------------------------------------|----------------------------|----------------------|---------------------------------|------------------------|------------------------------|--------------------------------|----------------|-----------------------------------------------------------------------------------------------------------------|-------------------------------------------------------------------------------------------------------------------------------------------------------------------------------------------------------------------------------------------------------------------------------------------------------------------------------------|------------------------------------------------|
|            |                                                |                   |                                 |                                                                                                                                                                 |                                               |                            | Mode                 | Format                          |                        | Last contact                 | End (step change in intensity) | N <sup>c</sup> | Frequency                                                                                                       | Length per session with description for varying lengths. (minutes <sup>b</sup> )                                                                                                                                                                                                                                                    |                                                |
|            | Intervention lifestyle by trained professional | Diet and exercise | No                              | Nutrition Edu.                                                                                                                                                  | Physician; Nutritionist                       | Yes                        | Individual and Group | Face to Face; Print             | Health Care; Community | 12                           | 12                             | 6              |                                                                                                                 | 60                                                                                                                                                                                                                                                                                                                                  | Yes                                            |
| Brown 2014 | Control                                        | Control           | No                              |                                                                                                                                                                 |                                               | No                         |                      |                                 |                        |                              |                                |                |                                                                                                                 |                                                                                                                                                                                                                                                                                                                                     | No                                             |
|            | RENEW                                          | Diet and exercise | Yes                             | MR-P; Nutrition Edu.                                                                                                                                            | Nurse (General); Other AHPs; Personal Trainer | No                         | Group                | Face to Face; Telephone; Print  | Health Care; Home      | 12                           | 3                              | 63             | Weekly                                                                                                          | Weeks 1-12 intensive intervention (weekly 3 hour intervention; 2 meal replacements per day, 1 hour exercise 2 x per week). Weeks 13-24 maintenance phase (3 hour monthly session, 1 hour exercise 2 x per week, weekly phone calls, weekly newsletter). Weeks 25-52 intermittent support (weekly phone calls and monthly mailings). | No                                             |
| Burke 2005 | Control usual care                             | Control           | No                              |                                                                                                                                                                 |                                               | No                         |                      | Face to Face; Print             | Health Care            |                              |                                |                |                                                                                                                 |                                                                                                                                                                                                                                                                                                                                     |                                                |
|            | Low sodium + fish diet                         | Diet and exercise | No                              | Nutrition Edu.                                                                                                                                                  | Physician; Dietitian                          | No                         | Individual and Group | Face to Face; Telephone; Print; | Health Care; Home      | 16                           | 4                              | 18             | 6 group plus individual (0-4m). Then, group: 2 x month for 1st month. 1 x month for 2 months. Then 1 x every 3m | Group = 90 mins. Length of individual sessions not stated.                                                                                                                                                                                                                                                                          |                                                |

| Study ID         | Groups:                                                                   | Intervention type | Intervention faded in intensity | Features<br>(meal replacements, nutrition education, financial incentives, intermittent fasting, content designed to help participants following programme end) | Provider <sup>a</sup>                    | Provider training received | Delivery             |                         | Intervention setting | Intervention timing (months) |                                | Sessions       |                                                                                                                                                                                      |                                                                                  | Intervention personalized, titrated or adapted |
|------------------|---------------------------------------------------------------------------|-------------------|---------------------------------|-----------------------------------------------------------------------------------------------------------------------------------------------------------------|------------------------------------------|----------------------------|----------------------|-------------------------|----------------------|------------------------------|--------------------------------|----------------|--------------------------------------------------------------------------------------------------------------------------------------------------------------------------------------|----------------------------------------------------------------------------------|------------------------------------------------|
|                  |                                                                           |                   |                                 |                                                                                                                                                                 |                                          |                            | Mode                 | Format                  |                      | Last contact                 | End (step change in intensity) | N <sup>c</sup> | Frequency                                                                                                                                                                            | Length per session with description for varying lengths. (minutes <sup>b</sup> ) |                                                |
| Burke 2015       | Standard behavioural weight loss treatment                                | Diet and exercise | Yes                             | Nutrition Edu.                                                                                                                                                  | Health care professional (not specified) | No                         | Group                | Face to Face            | Community; Home      | 18                           | 12                             | 20             | Weekly the first month, biweekly the second month, monthly for next 10 months, and every 6 weeks for 13-18m.                                                                         | 1 hour group sessions                                                            |                                                |
|                  | Self-efficacy enhancement plus standard behavioural weight loss treatment | Diet and exercise | Yes                             | Nutrition Edu.                                                                                                                                                  | Health care professional (not specified) | No                         | Individual and Group | Face to Face; Telephone | Community; Home      | 18                           | 12                             | 50             | SE - 1:1 every 2 weeks for first 12m. Then at least monthly. SBT: weekly the first month, biweekly the second month, monthly for next 10 months, and every 6 weeks for months 13-18. | 1 hour group session. 1:1 sessions: 23 mins.                                     |                                                |
| Cesa 2013        | Integrated Multimodal Medically Managed Inpatient Program                 | Diet and exercise | No                              | Nutrition Edu.                                                                                                                                                  | Psychologist/ Counsellor; Dietitian      | No                         | Individual and Group | Face to Face            | Inpatient            | 1.5                          | 1.5                            | 3              | Weekly                                                                                                                                                                               | 60                                                                               | Yes                                            |
|                  | Cognitive Behavior Therapy                                                | Diet and exercise | No                              | Nutrition Edu.                                                                                                                                                  | Psychologist/ Counsellor; Dietitian      | No                         | Individual and Group | Face to Face            | Inpatient            | 1.5                          | 1.5                            | 6              | Weekly                                                                                                                                                                               | 60                                                                               | Yes                                            |
|                  | VR-Enhanced Cognitive Behavior Therapy                                    | Diet and exercise | No                              | Nutrition Edu.                                                                                                                                                  | Psychologist/ Counsellor; Dietitian      | No                         | Individual and Group | Face to Face; Internet  | Inpatient            | 1.5                          | 1.5                            | 6              | Weekly                                                                                                                                                                               | 60                                                                               | Yes                                            |
| Chaiya soot 2018 | Control, Lifestyle Education Intervention                                 | Diet and exercise | No                              | Nutrition Edu.                                                                                                                                                  | Dietitian                                | No                         | Individual and Group | Face to Face; Print     |                      | 3                            | 3                              | 5              | Baseline, 2, 4, 8, 12 weeks                                                                                                                                                          | 30                                                                               | Yes                                            |
|                  | Lifestyle Education Intervention plus Meal Replacements                   | Diet and exercise | No                              | MR-P; Nutrition Edu.                                                                                                                                            | Dietitian                                | No                         | Individual and Group | Face to Face; Print     |                      | 3                            | 3                              | 5              | Baseline, 2, 4, 8, 12                                                                                                                                                                | 30                                                                               | Yes                                            |

| Study ID         | Groups:                           | Intervention type | Intervention faded in intensity | Features<br>(meal replacements, nutrition education, financial incentives, intermittent fasting, content designed to help participants following programme end) | Provider <sup>a</sup>      | Provider training received | Delivery             |                     | Intervention setting | Intervention timing (months) |                                | Sessions       |                                                                               |                                                                                                                   | Intervention personalized, titrated or adapted |
|------------------|-----------------------------------|-------------------|---------------------------------|-----------------------------------------------------------------------------------------------------------------------------------------------------------------|----------------------------|----------------------------|----------------------|---------------------|----------------------|------------------------------|--------------------------------|----------------|-------------------------------------------------------------------------------|-------------------------------------------------------------------------------------------------------------------|------------------------------------------------|
|                  |                                   |                   |                                 |                                                                                                                                                                 |                            |                            | Mode                 | Format              |                      | Last contact                 | End (step change in intensity) | N <sup>c</sup> | Frequency                                                                     | Length per session with description for varying lengths. (minutes <sup>b</sup> )                                  |                                                |
| Chee 2017        | Usual Care                        | Diet and exercise | Yes                             | Nutrition Edu.                                                                                                                                                  | Dietitian                  | Unclear                    | Unclear              | Face to Face; Print | Health Care          | 6                            | 12                             | 4              | Every 3m                                                                      |                                                                                                                   | Yes                                            |
|                  | tDNA Conventional Counseling      | Diet and exercise | Yes                             | MR-P; Nutrition Edu.                                                                                                                                            | Physician; Dietitian       | Unclear                    | Unclear              | Face to Face; Print | Health Care          | 6                            | 12                             | 8              | Monthly 0-6m then every 3m                                                    |                                                                                                                   | Yes                                            |
|                  | tDNA Motivational Interviewing    | Diet and exercise | Yes                             | MR-P; Nutrition Edu.                                                                                                                                            | Physician; Dietitian       | Unclear                    | Unclear              | Face to Face; Print | Health Care          | 6                            | 12                             | 8              | Monthly 0-6m then every 3m                                                    |                                                                                                                   | Yes                                            |
| Cheskin 2008     | Standard diet                     | Diet and exercise | Yes                             | Nutrition Edu.                                                                                                                                                  | Dietitian                  | No                         | Individual and Group | Face to Face        | Community; Home      | 20                           | 8                              | 36             | Group: every 2 weeks for 0-34 weeks, then mthly 12-20m. 3 individual meetings |                                                                                                                   | Yes                                            |
|                  | Meal replacement                  | Diet and exercise | Yes                             | MR-P; Nutrition Edu.                                                                                                                                            | Dietitian                  | No                         | Individual and Group | Face to Face        | Community; Home      | 20                           | 8                              | 36             | Group: every 2 weeks for 0-34 weeks, then mthly 12-20m. 3 individual meetings |                                                                                                                   | Yes                                            |
| Cheyette 2007    | Control                           | Diet only         | No                              | Nutrition Edu.                                                                                                                                                  | Dietitian                  | No                         | Individual           | Face to Face        | Health Care          |                              |                                | 1 minimum      | Annually                                                                      |                                                                                                                   | No                                             |
|                  | Weight No More intervention group | Diet and exercise | No                              | Nutrition Edu.; Help following programme end                                                                                                                    | Dietitian; Physiotherapist | Unclear                    | Group                | Face to Face; Print | Community            | 4                            | 4                              | 8              | Fortnightly                                                                   | 1.5 hours                                                                                                         | No                                             |
| Christensen 2012 | Reference group                   | Control           | No                              | Nutrition Edu.                                                                                                                                                  |                            | No                         | Group                | Face to Face        |                      | 12                           |                                | 12             | Monthly                                                                       | 2 hours                                                                                                           | No                                             |
|                  | Intervention group                | Diet and exercise | No                              | Nutrition Edu.; Help following programme end                                                                                                                    |                            | No                         | Group                | Face to Face        | Workplace            | 12                           | 3                              | 48             | Weekly                                                                        | 1 hour; Participants also instructed to spend additional personal time doing physical exercise (see 'Procedures') | Yes                                            |



| Study ID    | Groups:                                    | Intervention type | Intervention faded in intensity | Features<br>(meal replacements, nutrition education, financial incentives, intermittent fasting, content designed to help participants following programme end) | Provider <sup>a</sup>                          | Provider training received | Delivery                   |                                   | Intervention setting | Intervention timing (months) |                                | Sessions       |                                                                   |                                                                                                                                            | Intervention personalised, titrated or adapted |
|-------------|--------------------------------------------|-------------------|---------------------------------|-----------------------------------------------------------------------------------------------------------------------------------------------------------------|------------------------------------------------|----------------------------|----------------------------|-----------------------------------|----------------------|------------------------------|--------------------------------|----------------|-------------------------------------------------------------------|--------------------------------------------------------------------------------------------------------------------------------------------|------------------------------------------------|
|             |                                            |                   |                                 |                                                                                                                                                                 |                                                |                            | Mode                       | Format                            |                      | Last contact                 | End (step change in intensity) | N <sup>c</sup> | Frequency                                                         | Length per session with description for varying lengths. (minutes <sup>b</sup> )                                                           |                                                |
| Cleo 2018   | TTT Top Ten Tips habit formation           | Diet and exercise | No                              |                                                                                                                                                                 |                                                | No                         | Group                      | Face to Face; Print               | Community; Home      | 3                            | 3                              | 13             | Weekly phone calls                                                | 2 hrs group induction; Call length not stated.                                                                                             | No                                             |
|             | DSD Do Something Different online software | Diet and exercise | No                              |                                                                                                                                                                 |                                                | No                         | Individual and Group       | Face to Face; Telephone; Internet | Community; Home      | 3                            | 3                              | 13             | Weekly tasks and phone calls                                      | 2 hrs group induction. Call length not stated. tasks, length not stated                                                                    | Yes                                            |
|             | Wait list control (N/A)                    | N/A               | N/A                             | N/A                                                                                                                                                             | N/A                                            | N/A                        | N/A                        | N/A                               | N/A                  | N/A                          | N/A                            | N/A            | N/A                                                               | N/A                                                                                                                                        | N/A                                            |
| Cole 2013   | Control - individualised counselling       | Diet and exercise | No                              | Nutrition Edu.                                                                                                                                                  | Dietitian                                      | No                         | Individual                 | Face to Face                      | Health Care          | 3                            | 3                              | 1              | At least 1 session over 3m                                        | 45 – 60                                                                                                                                    | No                                             |
|             | Intervention-shared medical appointment    | Diet and exercise | No                              | Nutrition Edu.                                                                                                                                                  | Nurse (General); Dietitian; Nutritionist       | No                         | Group                      | Face to Face                      | Health Care          | 3                            | 3                              | 3              | 3 sessions over 3m                                                | 90                                                                                                                                         | No                                             |
| Conroy 2015 | Self-guided                                | Diet and exercise | No                              | Nutrition Edu.                                                                                                                                                  | Other                                          | No                         | Other - Self-guided manual | Print                             | Home                 | 3                            | 3                              |                |                                                                   | 12-week self-guided manual                                                                                                                 | No                                             |
|             | Interventionist led                        | Diet and exercise | No                              | Nutrition Edu.                                                                                                                                                  | Physician; Other                               | No                         | Group                      | Face to Face                      | Health Care          | 3                            | 3                              | 12             | Weekly                                                            | 60 mins                                                                                                                                    | No                                             |
| Cooper 2010 | Guided Self-Help Control                   | Control           | No                              | Nutrition Edu.                                                                                                                                                  | Psychologist/ Counsellor                       | Yes                        | Individual                 | Face to Face; Telephone           | Health Care; Home    | 5.5                          | 5.5                            | 17             |                                                                   | 20 mins; 'lasted 24 weeks and involved two initial face-to-face sessions with a therapist followed by up to 15 20-min telephone sessions.' |                                                |
|             | Behaviour Therapy                          | Diet only         | Yes                             | Nutrition Edu.; Help following programme end                                                                                                                    | Physician; Psychologist/ Counsellor; Dietitian | Yes                        | Individual                 | Face to Face                      | Health Care          | 10                           | 10                             | 24             | Weekly for the first 7 weeks and every 2 weeks from week 8 to 44. | 50 mins; Weight loss phase lasted until week 24-30.                                                                                        |                                                |
|             | Cognitive Behaviour Therapy                | Diet and exercise | Yes                             | Nutrition Edu; Help following programme end                                                                                                                     | Physician; Psychologist/                       | Yes                        | Individual                 | Face to Face                      | Health Care          | 10                           | 10                             | 24             | Weekly for the first 7 weeks and every 2 weeks from 8 to          | 50 mins;                                                                                                                                   |                                                |

| Study ID        | Groups:                                         | Intervention type | Intervention faded in intensity | Features (meal replacements, nutrition education, financial incentives, intermittent fasting, content designed to help participants following programme end) | Provider <sup>a</sup>                     | Provider training received | Delivery                                 |                     | Intervention setting | Intervention timing (months) |                                | Sessions       |                                                                   |                                                                                               | Intervention personalized, titrated or adapted |
|-----------------|-------------------------------------------------|-------------------|---------------------------------|--------------------------------------------------------------------------------------------------------------------------------------------------------------|-------------------------------------------|----------------------------|------------------------------------------|---------------------|----------------------|------------------------------|--------------------------------|----------------|-------------------------------------------------------------------|-----------------------------------------------------------------------------------------------|------------------------------------------------|
|                 |                                                 |                   |                                 |                                                                                                                                                              |                                           |                            | Mode                                     | Format              |                      | Last contact                 | End (step change in intensity) | N <sup>c</sup> | Frequency                                                         | Length per session with description for varying lengths. (minutes <sup>b</sup> )              |                                                |
|                 |                                                 |                   |                                 |                                                                                                                                                              | Counsellor; Dietitian                     |                            |                                          |                     |                      |                              |                                |                | week 44.                                                          | Weight loss phase lasted until week 24-30.                                                    |                                                |
| Cousins 1992    | Control                                         | Diet and exercise | No                              | Nutrition Edu.; Help following programme end                                                                                                                 |                                           | No                         | Other                                    | Print               | Home                 |                              |                                |                |                                                                   |                                                                                               | No                                             |
|                 | Individual                                      | Diet and exercise | Yes                             | Nutrition Edu.; Help following programme end                                                                                                                 | Dietitian                                 | No                         | Group                                    | Face to Face; Print | Community            | 12                           | 6                              | 30             | 24 x weekly, then 6 x monthly                                     |                                                                                               | Yes                                            |
|                 | Family                                          | Diet and exercise | Yes                             | Nutrition Edu.                                                                                                                                               | Dietitian                                 | No                         | Group                                    | Face to Face; Print | Community            | 12                           | 6                              | 30             | 24 x weekly, then 6 x monthly                                     |                                                                                               | Yes                                            |
| Craigh ead 1989 | Control, minimal contact                        | Diet and exercise | No                              | Nutrition Edu.                                                                                                                                               |                                           | No                         | Other - 12 written lessons with feedback | Print               | Home                 | 12                           | 6                              |                |                                                                   |                                                                                               | No                                             |
|                 | Contracted Exercise                             | Diet and exercise | No                              | Nutrition Edu.                                                                                                                                               | Other                                     | No                         | Group                                    | Face to Face; Print | Community            | 12                           | 6                              | 12             | Weekly                                                            | 60                                                                                            | No                                             |
|                 | Supervised Exercise                             | Diet and exercise | No                              | Nutrition Edu.                                                                                                                                               | Psychologist/ Counsellor; Other           | No                         | Group                                    | Face to Face; Print | Community            | 12                           | 6                              | 33             | Weekly group meetings from week 5. 3 x per week from week 5 to 12 | 60 mins 1 x per week for 12 weeks. 40 mins 3 x per week for 8 weeks (from week 5 to week 12). | Yes                                            |
| Crowley 2017    | Group Medical Visit                             |                   | Yes                             |                                                                                                                                                              | Nurse (General); GP; Physician; Dietitian | Unclear                    | Individual and Group                     | Face to Face; Print | Health Care          | 11.1                         | 3.7                            | 8              | Every 4 weeks for 16 weeks and every 8 weeks until week 48        | 1.5-2 hours                                                                                   | Yes                                            |
|                 | Intensive Weight Management Group Medical Visit | Diet and exercise | Yes                             | Nutrition Edu.; Help following programme end                                                                                                                 | Nurse (General); GP; Physician; Dietitian | Unclear                    | Individual and Group                     | Face to Face; Print | Health Care          | 11.1                         | 3.7                            | 16             | Every 2 weeks for 16 weeks and every 8 weeks until week 48        | 1.5-2 hours                                                                                   | Yes                                            |
|                 | Control                                         | Control           | No                              |                                                                                                                                                              |                                           | No                         |                                          |                     |                      |                              |                                |                |                                                                   |                                                                                               | No                                             |

| Study ID         | Groups:                    | Intervention type | Intervention faded in intensity | Features<br>(meal replacements, nutrition education, financial incentives, intermittent fasting, content designed to help participants following programme end) | Provider <sup>a</sup>                                                 | Provider training received | Delivery             |                          | Intervention setting | Intervention timing (months) |                                | Sessions       |                                                       |                                                                                                                                                                                                                                                                                                                                                                       | Intervention personalised, titrated or adapted |
|------------------|----------------------------|-------------------|---------------------------------|-----------------------------------------------------------------------------------------------------------------------------------------------------------------|-----------------------------------------------------------------------|----------------------------|----------------------|--------------------------|----------------------|------------------------------|--------------------------------|----------------|-------------------------------------------------------|-----------------------------------------------------------------------------------------------------------------------------------------------------------------------------------------------------------------------------------------------------------------------------------------------------------------------------------------------------------------------|------------------------------------------------|
|                  |                            |                   |                                 |                                                                                                                                                                 |                                                                       |                            | Mode                 | Format                   |                      | Last contact                 | End (step change in intensity) | N <sup>c</sup> | Frequency                                             | Length per session with description for varying lengths. (minutes <sup>b</sup> )                                                                                                                                                                                                                                                                                      |                                                |
| Dale 2009        | Modest                     | Diet and exercise | No                              | MR-F; Nutrition Edu.                                                                                                                                            | Dietitian; Exercise physiologist;                                     | Unclear                    | Individual and Group | Face to Face; Telephone; | Community            | 4                            | 4                              | 36             | Twice weekly                                          |                                                                                                                                                                                                                                                                                                                                                                       | Yes                                            |
|                  | Intensive intervention     | Diet and exercise | No                              | Nutrition Edu.                                                                                                                                                  | Dietitian; Exercise physiologist                                      | Unclear                    | Individual and Group | Face to Face; Telephone  | Community            | 4                            | 4                              | 36             | Twice weekly                                          |                                                                                                                                                                                                                                                                                                                                                                       | Yes                                            |
| Dalziel 2006     | Control                    | Control           | No                              | Nutrition Edu.                                                                                                                                                  | Physician; Dietitian                                                  | No                         | Unclear              | Face to Face             | Health Care          |                              |                                |                |                                                       |                                                                                                                                                                                                                                                                                                                                                                       | No                                             |
|                  | Experimental               | Diet only         | No                              | Nutrition Edu.                                                                                                                                                  | Physician; Dietitian                                                  | No                         | Unclear              | Face to Face             | Health Care          | 24                           | 2                              | 3              | At 8 weeks, then annually from baseline               | 1 hour first session, length of follow-up sessions not reported.                                                                                                                                                                                                                                                                                                      | No                                             |
| Damschröder 2014 | Control, MOVE - usual care | Diet and exercise | Yes                             | Nutrition Edu.                                                                                                                                                  | Nurse (General); Psychologist/ Counsellor; Dietitian; Physiotherapist | Unclear                    | Group                | Face to Face             | Health Care          | 24                           | 3                              | 58             | Weekly for 3m, then either quarterly or twice monthly | 11-12 weekly open-group sessions of 90 mins each over 3 months. During months 4-12, one group met quarterly for 90 minutes and the other groups met twice a month for 60 minutes. Some participants had the option of re-enrolling in the initial series of weekly sessions. Total hours over the year ranged from 22 to 35 hours. 12-24 mths as above for mths 4-12. | Yes                                            |
|                  | ASPIRE group, individual   | Diet and exercise | Yes                             | Nutrition Edu.                                                                                                                                                  | Health Trainer                                                        | Yes                        | Individual           | Telephone                | Home                 | 24                           | 3                              | 34             | Same as ASPIRE-Group but duration of sessions varied  | Up to 30 mins for the first 3 mths and 20 mins for the remaining 9                                                                                                                                                                                                                                                                                                    | Yes                                            |

| Study ID        | Groups:                         | Intervention type | Intervention faded in intensity | Features<br>(meal replacements, nutrition education, financial incentives, intermittent fasting, content designed to help participants following programme end) | Provider <sup>a</sup> | Provider training received | Delivery             |                     | Intervention setting | Intervention timing (months) |                                | Sessions       |                                                                                                                                                                                                    |                                                                                                                                                               | Intervention personalized, titrated or adapted |
|-----------------|---------------------------------|-------------------|---------------------------------|-----------------------------------------------------------------------------------------------------------------------------------------------------------------|-----------------------|----------------------------|----------------------|---------------------|----------------------|------------------------------|--------------------------------|----------------|----------------------------------------------------------------------------------------------------------------------------------------------------------------------------------------------------|---------------------------------------------------------------------------------------------------------------------------------------------------------------|------------------------------------------------|
|                 |                                 |                   |                                 |                                                                                                                                                                 |                       |                            | Mode                 | Format              |                      | Last contact                 | End (step change in intensity) | N <sup>c</sup> | Frequency                                                                                                                                                                                          | Length per session with description for varying lengths. (minutes <sup>b</sup> )                                                                              |                                                |
|                 | telephone counselling           |                   |                                 |                                                                                                                                                                 |                       |                            |                      |                     |                      |                              |                                |                |                                                                                                                                                                                                    | mths, totalling 11 hours across the year. 12-24 mths coaching every other mth, 6 sessions.                                                                    |                                                |
|                 | ASPIRE group, group counselling | Diet and exercise | Yes                             | Nutrition Edu. Help following programme end                                                                                                                     | Health Trainer        | Yes                        | Group                | Face to Face        | Health Care          | 24                           | 3                              | 34             | Both ASPIRE small-changes treatment arms consisted of weekly sessions for 3m, followed by 6m of sessions every other week, and then 3 monthly sessions over 12 months, for a total of 28 sessions. | Up to 90 mins for the first 3 mths and 60 mins for the remaining 9 mths, totalling 33 hours across the year. 12-24 mths coaching every other mth, 6 sessions. | Yes                                            |
| Daubermier 2016 | Active control intervention     | Diet and exercise | Yes                             | Nutrition Edu.                                                                                                                                                  | Dietitian             | Unclear                    | Group                | Face to Face; Print | Community            | 5.5                          | 5.5                            | 16             | 12 weekly then biweekly for 3 sessions, and then one session one month later plus a single all-day weekend session                                                                                 | 16 sessions: 2 hours; 5-hour all-day session                                                                                                                  | Yes                                            |
|                 | Mindfulness Intervention        | Diet and exercise | Yes                             | Nutrition Edu.; Help following programme end                                                                                                                    | Dietitian             | Yes                        | Group                | Face to Face; Print | Community            | 5.5                          | 5.5                            | 16             | 12 weekly then biweekly for 3 sessions, and then one session one month later plus a single all-day weekend session                                                                                 | 16 sessions: 2.5 hours; 6.5 hour all day session                                                                                                              | Yes                                            |
| Daumit 2013     | Control, Usual care             | Control           | No                              | Nutrition Edu.                                                                                                                                                  |                       | No                         | Other                |                     |                      |                              |                                | 1              |                                                                                                                                                                                                    |                                                                                                                                                               |                                                |
|                 | ACHIEVE                         | Diet and exercise | Yes                             | Nutrition Edu.                                                                                                                                                  | Health Trainer        | Yes                        | Individual and Group | Face to Face        | Health Care          | 18                           | 6                              | 279            | 1-6m: Group weight management class weekly, individual visit monthly, group PA class 3x per week, weigh-in                                                                                         | Group weight management class = 45 mins; Individual visit with interventionist 15-                                                                            | Yes                                            |

| Study ID       | Groups:                                   | Intervention type | Intervention faded in intensity | Features<br>(meal replacements, nutrition education, financial incentives, intermittent fasting, content designed to help participants following programme end) | Provider <sup>a</sup>      | Provider training received | Delivery             |                          | Intervention setting | Intervention timing (months) |                                | Sessions       |                                                                                                  |                                                                                                                                | Intervention personalised, titrated or adapted |
|----------------|-------------------------------------------|-------------------|---------------------------------|-----------------------------------------------------------------------------------------------------------------------------------------------------------------|----------------------------|----------------------------|----------------------|--------------------------|----------------------|------------------------------|--------------------------------|----------------|--------------------------------------------------------------------------------------------------|--------------------------------------------------------------------------------------------------------------------------------|------------------------------------------------|
|                |                                           |                   |                                 |                                                                                                                                                                 |                            |                            | Mode                 | Format                   |                      | Last contact                 | End (step change in intensity) | N <sup>c</sup> | Frequency                                                                                        | Length per session with description for varying lengths. (minutes <sup>b</sup> )                                               |                                                |
|                |                                           |                   |                                 |                                                                                                                                                                 |                            |                            |                      |                          |                      |                              |                                |                | weekly; 7-18m: monthly group and individual class, group PA class 3x week, weigh in weekly       | 20 mins; group PA class 45 mins, weigh-in = 2 mins                                                                             |                                                |
| de Zwaan 2017  | Internet-based guided self-help treatment |                   | No                              | Help following programme end                                                                                                                                    |                            | No                         | Individual           | Internet                 | Home                 | 4                            | 4                              | 17-18          | Participants email coach once per week. Coach emails back once per week.                         | No indication of time taken to complete each of the 11 modules is given.                                                       | No                                             |
|                | Cognitive Behavioural Therapy             | Diet and exercise | No                              | Help following programme end                                                                                                                                    |                            | No                         | Individual           | Face to Face             | Health Care          | 4                            | 4                              | 20             | Twice weekly for first month, then once weekly during remaining 3 months.                        | 50 mins; Participants also given additional homework: expected time to complete this is not given.                             | Yes                                            |
| Delahanty 2015 | Dietitian Referral group                  | Diet and exercise | No                              | Nutrition Edu.                                                                                                                                                  |                            | Unclear                    | Individual           | Face to Face; Print      | Health Care          |                              |                                | 1 +            | Individualised – 1 session plus follow-up sessions on individual basis at dietitian's discretion | Initial session (1 hour); follow-up sessions (20-40 minutes)                                                                   | Yes                                            |
|                | Group lifestyle intervention              | Diet and exercise | No                              | MR-P; Nutrition Edu.                                                                                                                                            | Physician; Dietitian       | Yes                        | Group                | Face to Face; Print      | Health Care          | 6                            | 6                              | 19             | Weekly                                                                                           | 1.5 hours                                                                                                                      | No                                             |
| deRoos 2017    | Control                                   | Control           | No                              |                                                                                                                                                                 |                            | No                         |                      | Telephone                | Home                 | 4                            |                                |                |                                                                                                  |                                                                                                                                | No                                             |
|                | Diet                                      | Diet only         | No                              | Nutrition Edu.                                                                                                                                                  | Dietitian                  | No                         | Individual and Group | Face to Face; Telephone; | Community; Home      | 12                           | 4                              |                | Weekly                                                                                           |                                                                                                                                | No                                             |
|                | Exercise                                  | Diet and exercise | No                              |                                                                                                                                                                 | Dietitian; Physiotherapist | No                         | Group                | Face to Face; Telephone  | Community; Home      | 12                           | 4                              | 32             | 2 x week groups sessions; 2 x Nordic walking                                                     | 4 hours per week exercise program; two x 1 hour group sessions; 2 x 1 hour sessions Nordic walking per week - individual home- | No                                             |

| Study ID   | Groups:                                       | Intervention type            | Intervention faded in intensity | Features<br>(meal replacements, nutrition education, financial incentives, intermittent fasting, content designed to help participants following programme end) | Provider <sup>a</sup>      | Provider training received | Delivery             |              | Intervention setting | Intervention timing (months) |                                | Sessions       |           |                                                                                                                                                                                                                                                                                           | Intervention personalised, titrated or adapted |
|------------|-----------------------------------------------|------------------------------|---------------------------------|-----------------------------------------------------------------------------------------------------------------------------------------------------------------|----------------------------|----------------------------|----------------------|--------------|----------------------|------------------------------|--------------------------------|----------------|-----------|-------------------------------------------------------------------------------------------------------------------------------------------------------------------------------------------------------------------------------------------------------------------------------------------|------------------------------------------------|
|            |                                               |                              |                                 |                                                                                                                                                                 |                            |                            | Mode                 | Format       |                      | Last contact                 | End (step change in intensity) | N <sup>c</sup> | Frequency | Length per session with description for varying lengths. (minutes <sup>b</sup> )                                                                                                                                                                                                          |                                                |
|            |                                               |                              |                                 |                                                                                                                                                                 |                            |                            |                      |              |                      |                              |                                |                |           | based exercise with 'Supervised lessons of Nordic walking by instructors are organised to increase motivation and compliance.' (4 hours per week for 16 weeks); Unclear if all Nordic walking sessions are organised - did not contribute to total N of sessions                          |                                                |
| deVos 2016 | Control<br>Tailor-made lifestyle intervention | Control<br>Diet and exercise | No<br>No                        | Nutrition Edu.                                                                                                                                                  | Dietitian; Physiotherapist | No<br>No                   | Individual and Group | Face to Face | Community            | 30                           | 6                              | 23 +           |           | First 3 dietitian appointments were biweekly, after that the frequency of visits was determined by mutual agreement. Invited to attend 20 weekly physical activity classes.<br><br>"...definition of compliance as attendance at ≥ 6 dietitian visits and ≥ 7 physical activity classes." | Yes                                            |
|            | BED                                           | Diet and exercise            | Yes                             | MR-F; Nutrition Edu.                                                                                                                                            | Nurse (General);           | No                         | Group                | Face to Face | Community            | 6                            | 3                              | 24             | Weekly    | 1.5 hour                                                                                                                                                                                                                                                                                  | No                                             |

| Study ID                             | Groups:              | Intervention type | Intervention faded in intensity | Features<br>(meal replacements, nutrition education, financial incentives, intermittent fasting, content designed to help participants following programme end) | Provider <sup>a</sup>                                                      | Provider training received | Delivery             |                                | Intervention setting | Intervention timing (months) |                                | Sessions       |                                                                                     |                                                                                                                 | Intervention personalized, titrated or adapted |
|--------------------------------------|----------------------|-------------------|---------------------------------|-----------------------------------------------------------------------------------------------------------------------------------------------------------------|----------------------------------------------------------------------------|----------------------------|----------------------|--------------------------------|----------------------|------------------------------|--------------------------------|----------------|-------------------------------------------------------------------------------------|-----------------------------------------------------------------------------------------------------------------|------------------------------------------------|
|                                      |                      |                   |                                 |                                                                                                                                                                 |                                                                            |                            | Mode                 | Format                         |                      | Last contact                 | End (step change in intensity) | N <sup>c</sup> | Frequency                                                                           | Length per session with description for varying lengths. (minutes <sup>b</sup> )                                |                                                |
| DeZwaan 2005                         |                      |                   |                                 |                                                                                                                                                                 | Physician; Dietitian                                                       |                            |                      |                                |                      |                              |                                |                |                                                                                     |                                                                                                                 |                                                |
|                                      | BED plus CBT         | Diet and exercise | Yes                             | MR-F; Nutrition Edu.                                                                                                                                            | Nurse (General); Physician; Dietitian                                      | No                         | Group                | Face to Face; Print            | Community            | 6                            | 3                              | 34             | Weekly and twice weekly in the last 10 weeks (CBT)                                  | 1.5 hour group sessions (weeks 1-24) plus 1.5-hours of CBT (Week 14-24)                                         | No                                             |
| Diabetes Prevention Program R G 2009 | Placebo              | Diet and exercise | No                              | Nutrition Edu.                                                                                                                                                  | Other                                                                      |                            | Individual           | Face to Face; Print            |                      | 36                           | 36                             | 4              | Annually                                                                            | 20 – 30                                                                                                         |                                                |
|                                      | Metformin (N/A)      | N/A               | N/A                             | N/A                                                                                                                                                             | N/A                                                                        | N/A                        | N/A                  | N/A                            | N/A                  | N/A                          | N/A                            | N/A            | N/A                                                                                 | N/A                                                                                                             | N/A                                            |
|                                      | Lifestyle            | Diet and exercise | Yes                             | MR-P; Nutrition Edu.; Help following programme end                                                                                                              | Psychologist/ Counsellor; Dietitian; Exercise physiologist; Health Trainer | Yes                        | Individual and Group | Face to Face; Telephone; Print | Community            | 36                           | 6                              | 358            | 16 sessions in first 24 weeks then monthly. [At least 2 exercise classes per week]  | 45 mins; Core curriculum sessions 30-60 mins; Sessions: 16+6+12+12=46. [Physical activity 2x52 x 3 years = 312] | Yes                                            |
| Djuric 2002                          | Control              | Control           | No                              | Nutrition Edu.                                                                                                                                                  | Dietitian                                                                  | No                         | Unclear              | Print                          |                      | 0                            | 0                              | 1              |                                                                                     |                                                                                                                 |                                                |
|                                      | Weight Watchers      | Diet and exercise | No                              | Nutrition Edu.                                                                                                                                                  | Dietitian                                                                  | Yes                        | Group                | Face to Face                   | Community            | 12                           | 12                             | 52             | Weekly                                                                              |                                                                                                                 |                                                |
|                                      | Individualized group | Diet and exercise | Yes                             | Nutrition Edu.                                                                                                                                                  | Dietitian                                                                  |                            | Individual and Group | Face to Face; Telephone; Print | Community            | 12                           | 3                              | 21             | 0-3m: weekly; 3-6m: every other week; 6-12m: monthly                                |                                                                                                                 | Yes                                            |
|                                      | Comprehensive group  | Diet and exercise | Yes                             | Nutrition Edu.                                                                                                                                                  | Dietitian                                                                  |                            | Individual and Group | Face to Face; Telephone        | Community            | 12                           | 3                              | 73             | Weekly                                                                              |                                                                                                                 | Yes                                            |
| Donnelly 2013                        | Phone Group          | Diet and exercise | Yes                             | MR-P; Nutrition Edu.; Help following programme end                                                                                                              | Physician; Dietitian; Health Trainer                                       | Yes                        | Group                | Telephone                      | Home                 | 18                           | 6                              | 38             | 0-6m: weekly 7-9m: 2 x per month 10-12m: monthly then every other month until 18m . | 60                                                                                                              | Yes                                            |
|                                      | Face-to-Face Group   | Diet and exercise | Yes                             | MR-P; Nutrition Edu.; Help                                                                                                                                      | Physician; Dietitian;                                                      | Yes                        | Group                | Face to Face                   | Community            | 18                           | 6                              | 38             | 0-6m: weekly 7-9m: 2 x per month 10-12m: monthly                                    | 60                                                                                                              | Yes                                            |

| Study ID    | Groups:                        | Intervention type | Intervention faded in intensity | Features<br>(meal replacements, nutrition education, financial incentives, intermittent fasting, content designed to help participants following programme end) | Provider <sup>a</sup>                          | Provider training received | Delivery   |                                       | Intervention setting | Intervention timing (months) |                                | Sessions       |                                                                                                                                                                         |                                                                                  | Intervention personalized, titrated or adapted |
|-------------|--------------------------------|-------------------|---------------------------------|-----------------------------------------------------------------------------------------------------------------------------------------------------------------|------------------------------------------------|----------------------------|------------|---------------------------------------|----------------------|------------------------------|--------------------------------|----------------|-------------------------------------------------------------------------------------------------------------------------------------------------------------------------|----------------------------------------------------------------------------------|------------------------------------------------|
|             |                                |                   |                                 |                                                                                                                                                                 |                                                |                            | Mode       | Format                                |                      | Last contact                 | End (step change in intensity) | N <sup>c</sup> | Frequency                                                                                                                                                               | Length per session with description for varying lengths. (minutes <sup>b</sup> ) |                                                |
|             |                                |                   |                                 | following programme end                                                                                                                                         | Health Trainer                                 |                            |            |                                       |                      |                              |                                |                | then every other month until 18m                                                                                                                                        |                                                                                  |                                                |
| Duncan 2016 | Control                        | Control           | No                              |                                                                                                                                                                 | GP                                             | No                         | Individual | Face to Face                          | Health Care          |                              |                                | 1              |                                                                                                                                                                         |                                                                                  | No                                             |
|             | Intervention                   | Diet and exercise | No                              | Nutrition Edu.; Help following programme end                                                                                                                    | Health Trainer                                 | Yes                        | Individual | Face to Face                          | Home                 | 4                            | 4                              | 6              | Ranged from 1-4 weeks                                                                                                                                                   | 60                                                                               | Yes                                            |
| Eakin 2014  | Usual care                     | Control           | No                              | Nutrition Edu.                                                                                                                                                  |                                                | Unclear                    | Individual | Print                                 | Health Care          |                              |                                | 0              |                                                                                                                                                                         |                                                                                  | No                                             |
|             | Telephone intervention         | Diet and exercise | Yes                             | Nutrition Edu.                                                                                                                                                  | Health Trainer                                 | Yes                        | Individual | Telephone; Print                      | Health Care          | 18                           | 6                              | 27             | 4 weekly calls; fortnightly calls for 5 months; monthly calls for 12 months.                                                                                            |                                                                                  | Yes                                            |
| Eaton 2016  | Control, Standard Intervention | Diet and exercise | Yes                             | Nutrition Edu.                                                                                                                                                  | Physician; Psychologist/ Counsellor            | Yes                        | Individual | Face to Face; Print                   | Community; Home      | 18                           | 4                              | 3              | In person sessions at 0, 6, 12m. Mailing at 1, 2, 4, 15 & 18m                                                                                                           | 90                                                                               | No                                             |
|             | Enhanced Intervention          | Diet and exercise | Yes                             | Nutrition Edu.                                                                                                                                                  | Physician; Psychologist/ Counsellor; Dietitian | Yes                        | Individual | Face to Face; Telephone; Print; Video | Community; Home      | 24                           | 6                              | 30             | 0-6m: weekly feedback & mailings, monthly phone, 2 DVDs. 6-12m: weekly mailings, bi-monthly phone. 12-18m: bimonthly mailings, 2 DVDs 1 phone. 18-24m: monthly mailing. | 90                                                                               | Yes                                            |
| Fahey 2018  | Self-paced condition           | Diet and exercise | Yes                             | Nutrition Edu.                                                                                                                                                  |                                                | Yes                        | Individual | Telephone; Internet; Print            | Home                 | 12                           | 4                              | 28             | Same schedule as per intervention group available, however upon self-initiation.                                                                                        | Telephone call length not stated; Aimed for 225-250 mins of weekly exercise goal | Yes                                            |
|             | Counselor-initiated condition  | Diet and exercise | Yes                             | MR-P; Nutrition Edu.                                                                                                                                            |                                                | Yes                        | Individual | Telephone; Internet                   | Home                 | 12                           | 4                              | Up to 28       | 0-4m: weekly 5-8m: 2 x per month 9-12m: 1 x per month                                                                                                                   | Telephone call length not stated; Aimed for 225-250 minutes of                   | Yes                                            |



| Study ID            | Groups:                                       | Intervention type | Intervention faded in intensity | Features<br>(meal replacements, nutrition education, financial incentives, intermittent fasting, content designed to help participants following programme end) | Provider <sup>a</sup>                                                                     | Provider training received | Delivery             |              | Intervention setting | Intervention timing (months) |                                | Sessions       |                                                                              |                                                                                                                                                                                                                                                  | Intervention personalised, titrated or adapted |
|---------------------|-----------------------------------------------|-------------------|---------------------------------|-----------------------------------------------------------------------------------------------------------------------------------------------------------------|-------------------------------------------------------------------------------------------|----------------------------|----------------------|--------------|----------------------|------------------------------|--------------------------------|----------------|------------------------------------------------------------------------------|--------------------------------------------------------------------------------------------------------------------------------------------------------------------------------------------------------------------------------------------------|------------------------------------------------|
|                     |                                               |                   |                                 |                                                                                                                                                                 |                                                                                           |                            | Mode                 | Format       |                      | Last contact                 | End (step change in intensity) | N <sup>c</sup> | Frequency                                                                    | Length per session with description for varying lengths. (minutes <sup>b</sup> )                                                                                                                                                                 |                                                |
|                     |                                               |                   |                                 |                                                                                                                                                                 |                                                                                           |                            |                      |              |                      |                              |                                |                |                                                                              | weekly exercise goal                                                                                                                                                                                                                             |                                                |
| Fernandez-Ruiz 2018 | Control                                       | Control           | No                              |                                                                                                                                                                 |                                                                                           | Unclear                    |                      |              |                      |                              |                                |                |                                                                              |                                                                                                                                                                                                                                                  | No                                             |
|                     | Intervention (healthy eating, exercise & CBT) | Diet and exercise | No                              | Nutrition Edu.                                                                                                                                                  | Nurse (General); Physician; Psychologist/ Counsellor; Nutritionist; Exercise physiologist | Unclear                    | Individual and Group | Face to Face | Health Care          | 12                           | 12                             | 232            | 4 x per week physical activity; monthly CBT & health ed.                     | 208 exercise sessions: 4 x per week, 40 mins. CBT 12 sessions, 1 per month, 60 mins. Health education (nurse) 12 sessions, 1 per month, 60 mins.                                                                                                 | Yes                                            |
| Finkels tein 2017   | Control                                       | Diet and exercise | No                              | Nutrition Edu.                                                                                                                                                  | Physician; Dietitian; Physiotherapist                                                     | No                         | Individual and Group | Face to Face | Health Care; Home    | 4                            | 4                              | 8              | Monthly (?) for exercise and diet.                                           | Lengths of sessions not stated. Individualised exercise prescription + 4 physiotherapist led gym session. Dietician led individual and group sessions in weeks 4,8,12 and 16. This may represent 4 sessions or more than 4 sessions - not clear. | Yes                                            |
|                     | Financial Reward                              | Diet and exercise | Yes                             | Nutrition Edu. Fin. Incentives                                                                                                                                  | Physician; Dietitian; Physiotherapist                                                     | No                         | Individual and Group | Face to Face | Health Care; Home    | 8                            | 4                              | 18             | Weigh-ins biweekly for 2m; weekly for 6m; Monthly (?) for exercise and diet. | Lengths of sessions not stated. Individualised exercise prescription + 4 physiotherapist led gym session. Dietician led                                                                                                                          | Yes                                            |

| Study ID    | Groups:                    | Intervention type | Intervention faded in intensity | Features<br>(meal replacements, nutrition education, financial incentives, intermittent fasting, content designed to help participants following programme end) | Provider <sup>a</sup>                                                     | Provider training received | Delivery   |                                                    | Intervention setting   | Intervention timing (months) |                                | Sessions       |                                                                          |                                                                                                                          | Intervention personalized, titrated or adapted |
|-------------|----------------------------|-------------------|---------------------------------|-----------------------------------------------------------------------------------------------------------------------------------------------------------------|---------------------------------------------------------------------------|----------------------------|------------|----------------------------------------------------|------------------------|------------------------------|--------------------------------|----------------|--------------------------------------------------------------------------|--------------------------------------------------------------------------------------------------------------------------|------------------------------------------------|
|             |                            |                   |                                 |                                                                                                                                                                 |                                                                           |                            | Mode       | Format                                             |                        | Last contact                 | End (step change in intensity) | N <sup>c</sup> | Frequency                                                                | Length per session with description for varying lengths. (minutes <sup>b</sup> )                                         |                                                |
|             |                            |                   |                                 |                                                                                                                                                                 |                                                                           |                            |            |                                                    |                        |                              |                                |                |                                                                          | individual and group sessions in weeks 4,8,12 and 16. This may represent 4 sessions or more than 4 sessions - not clear. |                                                |
| Fisher 2011 | Diet only                  | Diet only         | No                              | MR-F                                                                                                                                                            |                                                                           | No                         |            | Face to Face                                       | Health Care            | 6                            | 6                              | 0              |                                                                          |                                                                                                                          | No                                             |
|             | Diet + aerobic training    | Diet and exercise | No                              | MR-F                                                                                                                                                            | Exercise physiologist                                                     | No                         | Group      | Face to Face                                       | Health Care; Community | 6                            | 6                              | 78             |                                                                          | 50                                                                                                                       | No                                             |
|             | Diet + resistance training | Diet and exercise | No                              | MR-F                                                                                                                                                            | Exercise physiologist                                                     | No                         | Group      | Face to Face                                       | Health Care; Community | 6                            | 6                              | 78             |                                                                          | 50                                                                                                                       | No                                             |
| Foley 2016  | Usual care (Control)       | Control           | No                              |                                                                                                                                                                 |                                                                           | No                         | Other      | Print                                              | Health Care            |                              |                                |                |                                                                          |                                                                                                                          | No                                             |
|             | Weight loss intervention   | Diet and exercise | Yes                             | Nutrition Edu.                                                                                                                                                  | Psychologist/ Counsellor; Health care professional (not specified); Other | No                         | Individual | Face to Face; Telephone; Internet; App; Print; SMS | Health Care; Home      | 12                           | 3                              | 18             | Calls 1-4: weekly; Calls 5-10: biweekly<br>Calls 11-18: monthly          |                                                                                                                          | No                                             |
| Foreyt 1993 | Control (N/A)              | N/A               | N/A                             | N/A                                                                                                                                                             | N/A                                                                       | N/A                        | N/A        | N/A                                                | N/A                    | N/A                          | N/A                            | N/A            | N/A                                                                      | N/A                                                                                                                      | N/A                                            |
|             | Exercise only              | Exercise only     | Yes                             | MR-F; Help following programme end                                                                                                                              |                                                                           | Unclear                    | Group      | Face to Face                                       | Community; Home        | 12                           | 3                              | 23             | 12 weekly sessions, then 3 fortnightly sessions then 8 monthly sessions. | 60                                                                                                                       | Yes                                            |
|             | Diet only                  | Diet only         | Yes                             | Nutrition Edu.; Help following programme end                                                                                                                    | Dietitian                                                                 | Unclear                    | Group      | Face to Face                                       | Community              | 12                           | 3                              | 23             | 12 weekly sessions, then 3 fortnightly sessions then 8 monthly sessions. | 60                                                                                                                       | Yes                                            |
|             | Exercise plus diet         | Diet and exercise | Yes                             | Nutrition Edu.; Help following programme end                                                                                                                    | Dietitian                                                                 | Unclear                    | Group      | Face to Face                                       | Community; Home        | 12                           | 3                              | 23             | 12 weekly sessions, then 3 fortnightly sessions then 8 monthly sessions. | 60                                                                                                                       | Yes                                            |

| Study ID             | Groups:                                | Intervention type | Intervention faded in intensity | Features (meal replacements, nutrition education, financial incentives, intermittent fasting, content designed to help participants following programme end) | Provider <sup>a</sup>                   | Provider training received | Delivery             |                                   | Intervention setting | Intervention timing (months) |                                | Sessions       |                                                                                                       |                                                                                  | Intervention personalized, titrated or adapted |
|----------------------|----------------------------------------|-------------------|---------------------------------|--------------------------------------------------------------------------------------------------------------------------------------------------------------|-----------------------------------------|----------------------------|----------------------|-----------------------------------|----------------------|------------------------------|--------------------------------|----------------|-------------------------------------------------------------------------------------------------------|----------------------------------------------------------------------------------|------------------------------------------------|
|                      |                                        |                   |                                 |                                                                                                                                                              |                                         |                            | Mode                 | Format                            |                      | Last contact                 | End (step change in intensity) | N <sup>c</sup> | Frequency                                                                                             | Length per session with description for varying lengths. (minutes <sup>b</sup> ) |                                                |
| Forman 2013          | Standard Behavioural Treatment         | Diet and exercise | Yes                             | Nutrition Edu.                                                                                                                                               | Psychologist/ Counsellor                | Yes                        | Group                | Face to Face                      | Community            | 15                           | 9                              | 30             | Weekly for 20 weeks, then biweekly to 40 weeks                                                        | 75                                                                               | No                                             |
|                      | Acceptance-Based Behavioural Treatment | Diet and exercise | Yes                             | Nutrition Edu.; Help following programme end                                                                                                                 | Psychologist/ Counsellor                | Yes                        | Group                | Face to Face; Print               | Community            | 15                           | 9                              | 30             | Weekly for 20 weeks, then biweekly to 40 weeks                                                        | 75                                                                               | No                                             |
| Forman 2016          | Standard Behavioural Treatment         | Diet and exercise | Yes                             | Nutrition Edu.                                                                                                                                               | Physician                               |                            | Individual and Group | Face to Face                      | Community            | 12                           | 6                              | 25             | Weekly for 16 sessions, biweekly for 5 sessions, monthly for 2 sessions, and bimonthly for 2 sessions | 75                                                                               |                                                |
|                      | Acceptance-Based Treatment             | Diet and exercise | Yes                             | Nutrition Edu.; Help following programme end                                                                                                                 | Physician                               |                            | Individual and Group | Face to Face                      | Community            | 12                           | 6                              | 25             | Weekly for 16 sessions, biweekly for 5 sessions, monthly for 2 sessions, and bimonthly for 2 sessions | 75                                                                               |                                                |
| Foster-Schubert 2012 | Control-usual care                     | Control           | No                              |                                                                                                                                                              |                                         | No                         | Other – no contact   |                                   |                      |                              |                                |                |                                                                                                       |                                                                                  |                                                |
|                      | Calorie reduced diet                   | Diet only         | Yes                             | Nutrition Edu.                                                                                                                                               | Dietitian                               | No                         | Individual and Group | Face to Face; Telephone; Internet | Community; Home      | 12                           | 6                              | 38             | 2 + 24 weekly 0-24. Then 2 per month (12) during weeks 24 – 52                                        |                                                                                  | Yes                                            |
|                      | Aerobic exercise (N/A)                 | N/A               | N/A                             | N/A                                                                                                                                                          | N/A                                     | N/A                        | N/A                  | N/A                               | N/A                  | N/A                          | N/A                            | N/A            | N/A                                                                                                   | N/A                                                                              | N/A                                            |
|                      | Intervention - diet and exercise       | Diet and exercise | Yes                             | Nutrition Edu.                                                                                                                                               | Dietitian; Exercise physiologist;       | No                         | Individual and Group | Face to Face; Telephone; Internet | Community; Home      | 12                           | 6                              | 194            | 3 per week exercise. Plus 38 diet sessions.                                                           | 45                                                                               | Yes                                            |
| Freitas 2017         | Weight loss program + Sham             | Diet only         | No                              | Nutrition Edu.                                                                                                                                               | Psychologist/ Counsellor; Nutritionist; | Unclear                    | Individual and Group | Face to Face                      | Community            | 3                            | 3                              | 36             | Weekly therapy sessions; two                                                                          | 60                                                                               | Yes                                            |

| Study ID     | Groups:                           | Intervention type | Intervention faded in intensity | Features<br>(meal replacements, nutrition education, financial incentives, intermittent fasting, content designed to help participants following programme end) | Provider <sup>a</sup>                                   | Provider training received | Delivery                             |                  | Intervention setting   | Intervention timing (months) |                                | Sessions       |                                                                                                 |                                                                                                                                                                          | Intervention personalised, titrated or adapted |
|--------------|-----------------------------------|-------------------|---------------------------------|-----------------------------------------------------------------------------------------------------------------------------------------------------------------|---------------------------------------------------------|----------------------------|--------------------------------------|------------------|------------------------|------------------------------|--------------------------------|----------------|-------------------------------------------------------------------------------------------------|--------------------------------------------------------------------------------------------------------------------------------------------------------------------------|------------------------------------------------|
|              |                                   |                   |                                 |                                                                                                                                                                 |                                                         |                            | Mode                                 | Format           |                        | Last contact                 | End (step change in intensity) | N <sup>c</sup> | Frequency                                                                                       | Length per session with description for varying lengths. (minutes <sup>b</sup> )                                                                                         |                                                |
|              |                                   |                   |                                 |                                                                                                                                                                 | Physiotherapist                                         |                            |                                      |                  |                        |                              |                                |                | weekly exercises sessions                                                                       |                                                                                                                                                                          |                                                |
|              | Weight loss program + Exercise    | Diet and exercise | No                              | Nutrition Edu.                                                                                                                                                  | Psychologist/ Counsellor; Nutritionist; Physiotherapist | Unclear                    | Individual and Group                 | Face to Face     | Community              | 3                            | 3                              | 36             | Weekly therapy sessions; two weekly exercises sessions                                          | 60                                                                                                                                                                       | Yes                                            |
| Fuller 2012  | Western diet group                | Diet and exercise | No                              |                                                                                                                                                                 | Dietitian                                               | No                         | Individual                           | Face to Face     | Health Care; Community | 3                            | 3                              | 1              |                                                                                                 |                                                                                                                                                                          | No                                             |
|              | Korean diet group                 | Diet and exercise | No                              | MR-F                                                                                                                                                            | Dietitian                                               | No                         | Individual                           | Face to Face     | Health Care; Community | 3                            | 3                              | 1              |                                                                                                 |                                                                                                                                                                          | No                                             |
| Gold 2007    | Commercial programme eDiets       | Diet and exercise | Yes                             | Nutrition Edu.                                                                                                                                                  |                                                         |                            | Other - online weight loss programme | Internet         | Home                   | 0                            | 12                             | 1              |                                                                                                 | 1 x intro session. Weekly online exercise journal Online meetings, chat room, mentor system                                                                              | Yes                                            |
|              | Structured VTrim                  | Diet and exercise | Yes                             | Nutrition Edu.                                                                                                                                                  |                                                         |                            | Individual                           | Internet         | Home                   | 12                           | 6                              | 39             |                                                                                                 | 6M of weekly 1 hour sessions = 26 (Weekly self-reported weight. Weekly homework and weekly feedback. Weekly feedback on journal entries.) 6 – 12m Biweekly meetings = 13 | Yes                                            |
| Goodwin 2014 | Mailed-based intervention         | Diet and exercise | No                              | Nutrition Edu.                                                                                                                                                  |                                                         | No                         | Individual                           | Print            | Community              | 12                           | 12                             | 2              | 0, 12m                                                                                          |                                                                                                                                                                          | No                                             |
|              | Individual lifestyle intervention | Diet and exercise | Yes                             | Nutrition Edu.; Help following programme end                                                                                                                    | Health Trainer                                          | Unclear                    | Individual                           | Telephone; Print | Community              | 12                           | 6                              | 19             | Weekly (0-1m); Biweekly (2-3m); Monthly (4-6m); every 2 months (7-12m); every 3 months (13-24m) | 30 – 60                                                                                                                                                                  | Yes                                            |

| Study ID     | Groups:                                           | Intervention type | Intervention faded in intensity | Features<br>(meal replacements, nutrition education, financial incentives, intermittent fasting, content designed to help participants following programme end) | Provider <sup>a</sup>                                         | Provider training received | Delivery             |                                      | Intervention setting | Intervention timing (months) |                                | Sessions       |                                                                          |                                                                                     | Intervention personalized, titrated or adapted |
|--------------|---------------------------------------------------|-------------------|---------------------------------|-----------------------------------------------------------------------------------------------------------------------------------------------------------------|---------------------------------------------------------------|----------------------------|----------------------|--------------------------------------|----------------------|------------------------------|--------------------------------|----------------|--------------------------------------------------------------------------|-------------------------------------------------------------------------------------|------------------------------------------------|
|              |                                                   |                   |                                 |                                                                                                                                                                 |                                                               |                            | Mode                 | Format                               |                      | Last contact                 | End (step change in intensity) | N <sup>c</sup> | Frequency                                                                | Length per session with description for varying lengths. (minutes <sup>b</sup> )    |                                                |
| Gorin 2013   | Standard Behavioural Weight loss                  | Diet and exercise | Yes                             | Nutrition Edu.; Help following programme end                                                                                                                    | Psychologist/ Counsellor; Nutritionist; Exercise physiologist | Unclear                    | Group                | Face to Face                         | Community            | 18                           | 6                              | 52             | Weekly group meetings for 6m followed by biweekly meetings for 12m       |                                                                                     | Yes                                            |
|              | Enhanced home environment behavioural weight loss | Diet and exercise | Yes                             | Nutrition Edu.; Help following programme end                                                                                                                    | Psychologist/ Counsellor; Nutritionist; Exercise physiologist | Unclear                    | Group                | Face to Face; Internet; Print; Video | Community            | 18                           | 6                              | 52             | Weekly group meetings for 6m followed by biweekly meetings for 12 months |                                                                                     | Yes                                            |
| Gorin 2015   | Usual care                                        | Control           | No                              | Nutrition Edu.                                                                                                                                                  |                                                               | Unclear                    | Unclear              |                                      |                      |                              |                                |                |                                                                          |                                                                                     | No                                             |
|              | STRIDE                                            | Diet and exercise | Yes                             | Nutrition Edu.                                                                                                                                                  | Psychologist/ Counsellor; Nutritionist                        | Yes                        | Individual and Group | Face to Face; Telephone; Print       | Health Care          | 12                           | 6                              | 38             | Weekly 0-6m; Monthly 6-12m                                               | 2 hours                                                                             | Yes                                            |
| Grilo 2011   | Cognitive Behavioral Therapy (CBT)                | Diet only         | No                              | Nutrition Edu.                                                                                                                                                  | Psychologist/ Counsellor                                      | Yes                        | Group                | Face to Face                         | Health Care          | 5.5                          | 5.5                            | 16             | 16 sessions over 24 weeks                                                | 60                                                                                  | No                                             |
|              | Behavioral weight loss (BWL)                      | Diet and exercise | No                              | Nutrition Edu.                                                                                                                                                  | Psychologist/ Counsellor                                      | Yes                        | Group                | Face to Face                         | Health Care          | 5.5                          | 5.5                            | 16             | 16 sessions over 24 weeks                                                | 60                                                                                  | No                                             |
|              | CBT + BWL (N/A)                                   | N/A               | N/A                             | N/A                                                                                                                                                             | N/A                                                           | N/A                        | N/A                  | N/A                                  | N/A                  | N/A                          | N/A                            | N/A            | N/A                                                                      | N/A                                                                                 | N/A                                            |
| Grilo 2014   | Placebo                                           | Control           | No                              |                                                                                                                                                                 | Physician                                                     | Unclear                    |                      |                                      |                      | 4                            | 4                              | 0              |                                                                          |                                                                                     | No                                             |
|              | Placebo/CBTsh                                     | Diet only         | No                              | Nutrition Edu.; Help following programme end                                                                                                                    | Physician                                                     | Yes                        | Individual           | Face to Face; Print                  | Health Care          | 4                            | 4                              | 1              |                                                                          |                                                                                     | No                                             |
|              | Sibutramine (N/A)                                 | N/A               | N/A                             | N/A                                                                                                                                                             | N/A                                                           | N/A                        | N/A                  | N/A                                  | N/A                  | N/A                          | N/A                            | N/A            | N/A                                                                      | N/A                                                                                 | N/A                                            |
|              | Sibutramine/CBTsh (N/A)                           | N/A               | N/A                             | N/A                                                                                                                                                             | N/A                                                           | N/A                        | N/A                  | N/A                                  | N/A                  | N/A                          | N/A                            | N/A            | N/A                                                                      | N/A                                                                                 | N/A                                            |
| Hageman 2017 | Web-based only                                    | Diet and exercise | Yes                             | Nutrition Edu.; Help following programme end                                                                                                                    | Nurse (General)                                               | No                         | Individual           | Internet                             | Home                 | 30                           | 6                              | 61             | 0-6m: weekly. 6-18m: biweekly; 18-24m: monthly 24-30m: bimonthly         | 0 to 6m new content weekly posted weekly. 6 to 18m posted biweekly. Videos monthly. | No                                             |

| Study ID    | Groups:                                | Intervention type | Intervention faded in intensity | Features<br>(meal replacements, nutrition education, financial incentives, intermittent fasting, content designed to help participants following programme end) | Provider <sup>a</sup>                                | Provider training received | Delivery             |                     | Intervention setting     | Intervention timing (months) |                                | Sessions       |                                                                                                                                     |                                                                                                           | Intervention personalized, titrated or adapted |
|-------------|----------------------------------------|-------------------|---------------------------------|-----------------------------------------------------------------------------------------------------------------------------------------------------------------|------------------------------------------------------|----------------------------|----------------------|---------------------|--------------------------|------------------------------|--------------------------------|----------------|-------------------------------------------------------------------------------------------------------------------------------------|-----------------------------------------------------------------------------------------------------------|------------------------------------------------|
|             |                                        |                   |                                 |                                                                                                                                                                 |                                                      |                            | Mode                 | Format              |                          | Last contact                 | End (step change in intensity) | N <sup>c</sup> | Frequency                                                                                                                           | Length per session with description for varying lengths. (minutes <sup>b</sup> )                          |                                                |
|             |                                        |                   |                                 |                                                                                                                                                                 |                                                      |                            |                      |                     |                          |                              |                                |                |                                                                                                                                     | 18 to 24 months<br>Videos bimonthly,<br>24 to 30 months.<br>Weight logging daily.                         |                                                |
|             | Web-based discussion                   | Diet and exercise | Yes                             | Nutrition Edu.; Help following programme end                                                                                                                    | Nurse (General); Other                               | Yes                        | Individual           | Internet; Other     | Home                     | 30                           | 6                              | 109            | 0-6m: weekly;<br>6-18m: biweekly;<br>18-24m: monthly;<br>24-30m: bimonthly                                                          | As for WO<br>Plus 0-6 mths weekly primers.<br>6-12 mths biweekly primers.<br>12-18 mths monthly primers.  | Yes                                            |
|             | Web-based email                        | Diet and exercise | Yes                             | Nutrition Edu.; Help following programme end                                                                                                                    | Nurse (General); Psychologist/ Counsellor; Dietitian | No                         | Individual           | Internet; Other     | Home                     | 30                           | 6                              | 106            | 0-6m: weekly;<br>6-18m: biweekly;<br>18-24m: monthly;<br>24-30m: bimonthly                                                          | As for WO.<br>Plus 0-6 mths weekly feedback.<br>6-12 mths biweekly feedback. 12-18 mths monthly feedback. | Yes                                            |
| Hakala 1993 | Individual community-based counselling | Diet only         | Yes                             | Nutrition Edu.                                                                                                                                                  |                                                      | Unclear                    | Individual           | Face to Face; Print | Health Care              | 24                           | 12                             | 15             | Year 1: Monthly<br>Year 2: 4-monthly                                                                                                | 20                                                                                                        | No                                             |
|             | Group in-patient rehabilitation        | Diet and exercise | Yes                             | Nutrition Edu.                                                                                                                                                  | Physician; Nutritionist; Physiotherapist; Other AHPs | Unclear                    | Individual and Group | Face to Face        | Residential; Health Care | 24                           | 12                             | 84             | 0-2 weeks: daily (inpatient 44 sessions over 2 weeks).<br>Weeks 2-8: weekly.<br>Months 2-12: fortnightly.<br>Months: 12-24: monthly | 1 hour                                                                                                    | No                                             |
| Hanson 1976 | No treatment control condition (N/A)   | N/A               | N/A                             | N/A                                                                                                                                                             | N/A                                                  | N/A                        | N/A                  | N/A                 | N/A                      | N/A                          | N/A                            | N/A            | N/A                                                                                                                                 | N/A                                                                                                       | N/A                                            |
|             | Attention-placebo                      | Control           | No                              |                                                                                                                                                                 | Psychologist/ Counsellor                             | No                         |                      |                     |                          |                              |                                | 0              |                                                                                                                                     |                                                                                                           | No                                             |

| Study ID        | Groups:                                           | Intervention type | Intervention faded in intensity | Features<br>(meal replacements, nutrition education, financial incentives, intermittent fasting, content designed to help participants following programme end) | Provider <sup>a</sup>                      | Provider training received | Delivery                                     |                     | Intervention setting | Intervention timing (months) |                                | Sessions       |                                                                                                         |                                                                                  | Intervention personalized, titrated or adapted |
|-----------------|---------------------------------------------------|-------------------|---------------------------------|-----------------------------------------------------------------------------------------------------------------------------------------------------------------|--------------------------------------------|----------------------------|----------------------------------------------|---------------------|----------------------|------------------------------|--------------------------------|----------------|---------------------------------------------------------------------------------------------------------|----------------------------------------------------------------------------------|------------------------------------------------|
|                 |                                                   |                   |                                 |                                                                                                                                                                 |                                            |                            | Mode                                         | Format              |                      | Last contact                 | End (step change in intensity) | N <sup>c</sup> | Frequency                                                                                               | Length per session with description for varying lengths. (minutes <sup>b</sup> ) |                                                |
|                 | control condition                                 |                   |                                 |                                                                                                                                                                 |                                            |                            |                                              |                     |                      |                              |                                |                |                                                                                                         |                                                                                  |                                                |
|                 | Conventional self-management condition            | Diet only         | No                              |                                                                                                                                                                 | Psychologist/ Counsellor                   | No                         | Group                                        | Face to Face; Print |                      | 2.5                          | 2.5                            | 10             | Weekly                                                                                                  | 1 hour                                                                           | No                                             |
|                 | Programmed text with low therapist-group contact  | Diet only         | No                              |                                                                                                                                                                 | Psychologist/ Counsellor                   | No                         | Group                                        | Face to Face; Print |                      | 2.5                          | 2.5                            | 3              | First meeting week 1, second meeting week 5, and 3 meeting week 10                                      |                                                                                  | No                                             |
|                 | Programmed text with high therapist-group contact | Diet only         | No                              |                                                                                                                                                                 | Psychologist/ Counsellor                   | No                         | Group                                        | Face to Face; Print |                      | 2.5                          | 2.5                            | 10             | Weekly                                                                                                  | 1 hour                                                                           | No                                             |
| Hardcastle 2013 | Control                                           | Diet and exercise | No                              | Nutrition Edu.                                                                                                                                                  | Nurse (General)                            | Yes                        | Other - Single appointment; provided leaflet | Print               | Health Care          | 6                            | 6                              | 1              | Once                                                                                                    |                                                                                  | No                                             |
|                 | MI counselling intervention                       | Diet and exercise | No                              | Nutrition Edu.                                                                                                                                                  | Psychologist/ Counsellor; Personal Trainer | Yes                        | Individual                                   | Face to Face        | Health Care          | 6                            | 6                              | 5              | Anytime over a 6m period                                                                                | 20 – 30                                                                          | Yes                                            |
| Harrigan 2016   | Usual Care Group                                  | Diet and exercise | No                              |                                                                                                                                                                 |                                            | Unclear                    | Unclear                                      | Unclear;            | Health Care          |                              |                                | 2              |                                                                                                         |                                                                                  | No                                             |
|                 | Telephone Weight Loss Counseling                  | Diet and exercise | Yes                             |                                                                                                                                                                 | Dietitian                                  | No                         | Individual                                   | Telephone           | Home                 | 6                            | 6                              | 11             | Once per week (month 1), then every two weeks (months 2 and 3), and once per month (months 4, 5, and 6) | 30                                                                               | No                                             |
|                 | In-Person Weight Loss Counseling                  | Diet and exercise | Yes                             |                                                                                                                                                                 | Dietitian                                  | No                         | Individual                                   | Face to Face        | Health Care          | 6                            | 6                              | 11             | Once per week (month 1), then every two weeks (months 2 and 3), and once per month (months 4, 5, and 6) | 30                                                                               | No                                             |

| Study ID        | Groups:                           | Intervention type | Intervention faded in intensity | Features<br>(meal replacements, nutrition education, financial incentives, intermittent fasting, content designed to help participants following programme end) | Provider <sup>a</sup>                               | Provider training received | Delivery                    |                                               | Intervention setting | Intervention timing (months) |                                | Sessions           |                                                                                                       |                                                                                  | Intervention personalized, titrated or adapted |
|-----------------|-----------------------------------|-------------------|---------------------------------|-----------------------------------------------------------------------------------------------------------------------------------------------------------------|-----------------------------------------------------|----------------------------|-----------------------------|-----------------------------------------------|----------------------|------------------------------|--------------------------------|--------------------|-------------------------------------------------------------------------------------------------------|----------------------------------------------------------------------------------|------------------------------------------------|
|                 |                                   |                   |                                 |                                                                                                                                                                 |                                                     |                            | Mode                        | Format                                        |                      | Last contact                 | End (step change in intensity) | N <sup>c</sup>     | Frequency                                                                                             | Length per session with description for varying lengths. (minutes <sup>b</sup> ) |                                                |
| Harris 2017     | Waist Winners Too                 | Diet and exercise | No                              | Nutrition Edu.; Help following programme end                                                                                                                    | Dietitian; Health care professional (not specified) | Yes                        | Individual                  | Face to Face                                  | Health Care; Home    | 12                           | 6                              | 15                 | Every 2-3 weeks during weight loss phase (months 1-6); monthly during maintenance phase (months 7-12) | 40 – 60                                                                          | Yes                                            |
|                 | TAKE 5                            | Diet and exercise | No                              | Nutrition Edu.; Help following programme end                                                                                                                    | Dietitian; Health care professional (not specified) | Yes                        | Individual                  | Face to Face                                  | Health Care; Home    | 12                           | 6                              | 15                 | Every 2-3 weeks during weight loss phase (months 1-6); monthly during maintenance phase (months 7-12) | 40 – 60                                                                          | Yes                                            |
| Hunt 2014       | Control, Wait-list                | Control           | No                              | Nutrition Edu.                                                                                                                                                  |                                                     |                            |                             | Print                                         |                      |                              |                                |                    |                                                                                                       |                                                                                  |                                                |
|                 | FFIT                              | Diet and exercise | Yes                             | Nutrition Edu.; Help following programme end                                                                                                                    | Personal Trainer                                    | Yes                        | Group                       | Face to Face; Print                           | Community            | 12                           | 3                              | 19                 | Weekly for 12 weeks. 6 emails over 9 months. 1 reunion at 6 months.                                   | 1.5 hours for 12 weekly sessions. Then 6 emails over 9m and 1 x reunion at 6m.   | Yes                                            |
| Huseinovic 2016 | Control Group                     | Diet only         | No                              | Nutrition Edu.                                                                                                                                                  |                                                     | No                         | Other - leaflet at baseline | Print;                                        | Health Care          | 0                            | 0                              |                    |                                                                                                       |                                                                                  | No                                             |
|                 | Diet behaviour modification Group | Diet and exercise | No                              | Nutrition Edu.; Help following programme end                                                                                                                    | Dietitian                                           | Unclear                    | Individual                  | Face to Face; Telephone; Internet; Print; SMS | Health Care          | 12                           | 3                              | 4                  | Single face-to-face; biweekly SMS (3) followed by biweekly calls (3); monthly emails (9)              | 1.5 hours single face-to-face session; Call length not stated.                   | Yes                                            |
| Irwin 2003      | Control Group                     | Control           | No                              |                                                                                                                                                                 |                                                     |                            |                             |                                               |                      | 0                            | 0                              | 0                  | 0                                                                                                     | 0                                                                                | No                                             |
|                 | Exercise group                    | Exercise only     | Yes                             | Help following programme end                                                                                                                                    | Exercise physiologist                               |                            | Group                       | Face to Face                                  | Community; Home      | 12                           | 3                              | 36                 | 3 times per week for the first 3 months and one per week the rest 9 months                            | 45                                                                               | No                                             |
| Jackson 1982    | Control                           | Control           | No                              |                                                                                                                                                                 | Other                                               | No                         | Unclear                     | Face to Face                                  | Community            |                              |                                |                    |                                                                                                       |                                                                                  | Yes                                            |
|                 | Treatment                         | Diet and exercise | No                              | Nutrition Edu.; Fin. Incentives                                                                                                                                 | Other                                               | Unclear                    | Group                       | Face to Face; Print                           | Community            | 4                            | 4                              | Mothers: 7 session | Mothers: fortnightly; Participants: weekly                                                            | Mothers: 1 hr sessions;                                                          | Yes                                            |



| Study ID     | Groups:                      | Intervention type | Intervention faded in intensity | Features<br>(meal replacements, nutrition education, financial incentives, intermittent fasting, content designed to help participants following programme end) | Provider <sup>a</sup>                                               | Provider training received | Delivery             |                            | Intervention setting | Intervention timing (months) |                                | Sessions                          |                                                                                                                                                                                                                                                                                        |                                                                                                 | Intervention personalized, titrated or adapted |
|--------------|------------------------------|-------------------|---------------------------------|-----------------------------------------------------------------------------------------------------------------------------------------------------------------|---------------------------------------------------------------------|----------------------------|----------------------|----------------------------|----------------------|------------------------------|--------------------------------|-----------------------------------|----------------------------------------------------------------------------------------------------------------------------------------------------------------------------------------------------------------------------------------------------------------------------------------|-------------------------------------------------------------------------------------------------|------------------------------------------------|
|              |                              |                   |                                 |                                                                                                                                                                 |                                                                     |                            | Mode                 | Format                     |                      | Last contact                 | End (step change in intensity) | N <sup>c</sup>                    | Frequency                                                                                                                                                                                                                                                                              | Length per session with description for varying lengths. (minutes <sup>b</sup> )                |                                                |
|              |                              |                   |                                 |                                                                                                                                                                 |                                                                     |                            |                      |                            |                      |                              |                                | s;<br>Participants:<br>6 sessions | Participants: not reported                                                                                                                                                                                                                                                             |                                                                                                 |                                                |
| Jackson 2018 | Brief strategic therapy      | Diet and exercise | Yes                             | Nutrition Edu.                                                                                                                                                  | Psychologist/<br>Counsellor;<br>Dietitian;<br>Exercise physiologist | Unclear                    | Individual and Group | Face to Face;<br>Telephone | Inpatient;<br>Home   | 7                            | 7                              | 44                                | 1m inpatient phase (2 weekly nutrition education sessions, 5 weekly physical activity classes, 2 weekly psychotherapy sessions);<br>6m Outpatient phase: 8 telephone psychotherapy sessions (2 sessions per month the first two mths after discharge and one session/mth for 4 months. | 45 min nutrition education; 45 min psychotherapy sessions;<br>Telephone call length not stated. | Yes                                            |
|              | Cognitive-behavioral therapy | Diet and exercise | Yes                             | Nutrition Edu.                                                                                                                                                  | Psychologist/<br>Counsellor;<br>Dietitian;<br>Exercise physiologist | Unclear                    | Individual and Group | Face to Face;<br>Telephone | Inpatient;<br>Home   | 7                            | 7                              | 44                                | Inpatient phase (2 weekly nutrition education sessions, 5 weekly physical activity classes, 2 weekly psychotherapy sessions);<br>Outpatient phase: 8 telephone psychotherapy sessions (2 sessions per month the first two mths after discharge and one session/mth for 4 months.       | 45 min nutrition education; 45 min psychotherapy sessions;<br>Telephone call length not stated. | Yes                                            |

| Study ID     | Groups:                                           | Intervention type | Intervention faded in intensity | Features<br>(meal replacements, nutrition education, financial incentives, intermittent fasting, content designed to help participants following programme end) | Provider <sup>a</sup> | Provider training received | Delivery                                |                                | Intervention setting | Intervention timing (months) |                                | Sessions       |                                                                                                                                                                                                                 |                                                                                                                                                                                                               | Intervention personalized, titrated or adapted |
|--------------|---------------------------------------------------|-------------------|---------------------------------|-----------------------------------------------------------------------------------------------------------------------------------------------------------------|-----------------------|----------------------------|-----------------------------------------|--------------------------------|----------------------|------------------------------|--------------------------------|----------------|-----------------------------------------------------------------------------------------------------------------------------------------------------------------------------------------------------------------|---------------------------------------------------------------------------------------------------------------------------------------------------------------------------------------------------------------|------------------------------------------------|
|              |                                                   |                   |                                 |                                                                                                                                                                 |                       |                            | Mode                                    | Format                         |                      | Last contact                 | End (step change in intensity) | N <sup>c</sup> | Frequency                                                                                                                                                                                                       | Length per session with description for varying lengths. (minutes <sup>b</sup> )                                                                                                                              |                                                |
| Jakicic 2011 | Self Help Group                                   | Exercise only     | No                              |                                                                                                                                                                 |                       | No                         | Other - provided manual and newsletters | Print;                         | Community            | 18                           |                                | 1              |                                                                                                                                                                                                                 | Monthly newsletter.                                                                                                                                                                                           | No                                             |
|              | Moderate Physical Activity                        | Exercise only     | Yes                             | Nutrition Edu.                                                                                                                                                  | Personal Trainer      | Unclear                    | Individual and Group                    | Face to Face; Telephone; Print | Community            | 18                           | 6                              | 156            | 4 x per week for 6 months, weekly contact between months 7 - 18                                                                                                                                                 | Length of face-to-face sessions not reported; Telephone calls (< 10 mins)                                                                                                                                     | No                                             |
|              | High Physical Activity                            | Exercise only     | Yes                             | Nutrition Edu.                                                                                                                                                  | Personal Trainer      | Unclear                    | Individual and Group                    | Face to Face; Telephone; Print | Community            | 18                           | 6                              | 156            | 4 x per week for 6 months, weekly contact between months 7 - 18                                                                                                                                                 | Length of face-to-face sessions not reported; Telephone calls (< 10 mins))                                                                                                                                    | No                                             |
| Jakicic 2015 | Standard behavior weight loss interventions group | Diet and exercise | Yes                             | Nutrition Edu.                                                                                                                                                  | Other                 | Unclear                    | Group                                   | Face to Face; Print            | Community            | 18                           | 6                              | 52             | Sessions were conducted weekly for months 1–6 and every other week during months 7–18.                                                                                                                          | Group-based intervention sessions: approximately 45 min                                                                                                                                                       | Yes                                            |
|              | ADOPT group                                       | Diet and exercise | Yes                             | Nutrition Edu.                                                                                                                                                  | Other                 | Unclear                    | Group                                   | Face to Face; Telephone; Print | Community            | 18                           | 6                              | 86             | Sessions conducted weekly for months 1–6 and every other week during months 7–18. Biweekly phone contact; Weekly supervised exercise sessions for months 1–6; two 12-wk campaigns to promote physical activity. | Group-based intervention sessions: approximately 45 min; 10-min telephone call; Supervised physical activity sessions: A minimum of 30 min per session was encouraged. two 12-wk physical activity campaigns. | Yes                                            |
|              | MAINTAIN Group (N/A)                              | N/A               | N/A                             | N/A                                                                                                                                                             | N/A                   | N/A                        | N/A                                     | N/A                            | N/A                  | N/A                          | N/A                            | N/A            | N/A                                                                                                                                                                                                             | N/A                                                                                                                                                                                                           | N/A                                            |
| Jebb 2011    | Standard care                                     | Diet and exercise | No                              | Nutrition Edu.                                                                                                                                                  | GP                    | Yes                        | Individual                              | Face to Face                   | Health Care          | 0                            | 0                              | 1              | Single session                                                                                                                                                                                                  |                                                                                                                                                                                                               |                                                |

| Study ID     | Groups:                                     | Intervention type | Intervention faded in intensity | Features<br>(meal replacements, nutrition education, financial incentives, intermittent fasting, content designed to help participants following programme end) | Provider <sup>a</sup> | Provider training received | Delivery   |                        | Intervention setting | Intervention timing (months) |                                | Sessions       |                                                                                                                                          |                                                                                  | Intervention personalised, titrated or adapted |
|--------------|---------------------------------------------|-------------------|---------------------------------|-----------------------------------------------------------------------------------------------------------------------------------------------------------------|-----------------------|----------------------------|------------|------------------------|----------------------|------------------------------|--------------------------------|----------------|------------------------------------------------------------------------------------------------------------------------------------------|----------------------------------------------------------------------------------|------------------------------------------------|
|              |                                             |                   |                                 |                                                                                                                                                                 |                       |                            | Mode       | Format                 |                      | Last contact                 | End (step change in intensity) | N <sup>c</sup> | Frequency                                                                                                                                | Length per session with description for varying lengths. (minutes <sup>b</sup> ) |                                                |
|              | Commercial programme                        | Diet and exercise | No                              | Nutrition Edu.                                                                                                                                                  | Health Trainer        | Unclear                    | Group      | Face to Face; Internet | Community            | 12                           | 12                             | 52             | Weekly                                                                                                                                   | 60                                                                               | Yes                                            |
| Jebb 2017    | Usual care                                  | Diet only         |                                 | Nutrition Edu.                                                                                                                                                  | Nurse (General)       | No                         | Individual | Face to Face; Print    | Health Care          | 3                            | 3                              | 6 to 12        | Weekly or biweekly                                                                                                                       |                                                                                  | Yes                                            |
|              | Low energy total diet replacement programme | Diet only         | Yes                             | MR-F; Nutrition Edu.; Help following programme end                                                                                                              | Health Trainer        | Yes                        | Individual | Face to Face           | Community            | 6                            | 6                              | 15             | Weekly for first 12 weeks, then monthly                                                                                                  |                                                                                  | Yes                                            |
| Jeffery 1995 | Control group                               | Control           | No                              |                                                                                                                                                                 |                       |                            |            |                        |                      |                              |                                |                |                                                                                                                                          |                                                                                  |                                                |
|              | Standard Behavioural Therapy (SBT)          | Diet and exercise | Yes                             | Nutrition Edu.                                                                                                                                                  | Other                 | Yes                        | Group      | Face to Face; Print    |                      | 18                           | 4.6                            | 33             | Weekly for 20 weeks; Monthly from week 20 to month 18, also encouraged to attend weekly weigh-in sessions                                |                                                                                  | Yes                                            |
|              | SBT + Incentives (I)                        | Diet and exercise | Yes                             | Nutrition Edu.; Fin. Incentives                                                                                                                                 | Other                 | Yes                        | Group      | Face to Face; Print    |                      | 18                           | 4.6                            | 33             | Weekly for 20 weeks; Monthly from week 20 to month 18, also encouraged to attend weekly weigh-in sessions                                |                                                                                  | Yes                                            |
|              | SBT + Food Provision (FP)                   | Diet and exercise | Yes                             | MR-P; Nutrition Edu.                                                                                                                                            | Other                 | Yes                        | Group      | Face to Face; Print    |                      | 18                           | 4.6                            | 33             | Weekly for 20 weeks; Monthly from week 20 to month 18, also encouraged to attend weekly weigh-in sessions; food provided for 5 days/week |                                                                                  | Yes                                            |
|              | SBT + FP + I                                | Diet and exercise | Yes                             | MR-P; Nutrition Edu.; Fin. Incentives                                                                                                                           | Other                 | Yes                        | Group      | Face to Face; Print    |                      | 18                           | 4.6                            | 33             | Weekly for 20 weeks; Monthly from week 20 to month 18, also encouraged to attend                                                         |                                                                                  | Yes                                            |

| Study ID     | Groups:                    | Intervention type | Intervention faded in intensity | Features<br>(meal replacements, nutrition education, financial incentives, intermittent fasting, content designed to help participants following programme end) | Provider <sup>a</sup> | Provider training received | Delivery   |                          | Intervention setting | Intervention timing (months) |                                | Sessions                 |                                                                                                                                                          |                                                                                                                              | Intervention personalized, titrated or adapted |
|--------------|----------------------------|-------------------|---------------------------------|-----------------------------------------------------------------------------------------------------------------------------------------------------------------|-----------------------|----------------------------|------------|--------------------------|----------------------|------------------------------|--------------------------------|--------------------------|----------------------------------------------------------------------------------------------------------------------------------------------------------|------------------------------------------------------------------------------------------------------------------------------|------------------------------------------------|
|              |                            |                   |                                 |                                                                                                                                                                 |                       |                            | Mode       | Format                   |                      | Last contact                 | End (step change in intensity) | N <sup>c</sup>           | Frequency                                                                                                                                                | Length per session with description for varying lengths. (minutes <sup>b</sup> )                                             |                                                |
|              |                            |                   |                                 |                                                                                                                                                                 |                       |                            |            |                          |                      |                              |                                |                          | weekly weigh-in sessions; food provided for 5 days/week                                                                                                  |                                                                                                                              |                                                |
| Jeffery 2003 | Standard behaviour therapy | Diet and exercise | Yes                             | Nutrition Edu.; Help following programme end                                                                                                                    | Health Trainer        | Unclear                    | Group      | Face to Face; Print      | Community            | 18                           | 12                             | 45                       | Weekly from 0-6 months; biweekly from 6-12 months; monthly from 12-18 months                                                                             |                                                                                                                              | No                                             |
|              | High physical activity     | Diet and exercise | Yes                             | Nutrition Edu.; Fin. Incentives; Help following programme end                                                                                                   | Personal Trainer      | Unclear                    | Group      | Face to Face; Print      | Community            | 18                           | 12                             | 90                       | Weekly from 0-6 months; biweekly from 6-12 months; monthly from 12-18 months; Exercise coaches met with small groups before or after each group session. | Exercise coaches met with participants as an adjunct to regular standard behavioral treatment for 15–20 min in small groups. | Yes                                            |
| Jenkins 2017 | Control                    | Control           | No                              | Nutrition Edu.                                                                                                                                                  |                       | Unclear                    |            | Print                    | Health Care          |                              |                                |                          |                                                                                                                                                          |                                                                                                                              | No                                             |
|              | Dietary advice only        | Diet only         | Yes                             | Nutrition Edu.                                                                                                                                                  |                       | Unclear                    | Individual | Telephone; Print         | Health Care          | 6                            | 6                              | 9                        | Weekly (Month 1); Monthly (Months 0-5)                                                                                                                   | 20 – 30                                                                                                                      | Yes                                            |
|              | Food basket only           | Diet only         | No                              |                                                                                                                                                                 |                       | Unclear                    | Individual | Print; Other             | Residential          | 6                            | 6                              | Received 26 food baskets | Weekly                                                                                                                                                   |                                                                                                                              | No                                             |
|              | Food and advice            | Diet only         | Yes                             | Nutrition Edu.                                                                                                                                                  |                       | Unclear                    | Individual | Telephone; Print; Other  | Health Care          | 6                            | 6                              | 9 plus 26 food baskets   | Weekly (Month 1); Monthly (Months 0-5); weekly baskets                                                                                                   | 20 – 30                                                                                                                      | Yes                                            |
| John 2011    | Control                    | Diet only         | No                              | Nutrition Edu.; Help following programme end                                                                                                                    | Dietitian             | Unclear                    | Individual | Face to Face             | Community            | 7.4                          | 7.4                            | 1                        | single individual sessions; monthly weigh-ins                                                                                                            | 1 hour                                                                                                                       | Yes                                            |
|              | Deposit contracts group    | Diet only         | No                              | Nutrition Edu.; Fin. Incentives; Help following programme end                                                                                                   | Dietitian             | Unclear                    | Individual | Face to Face; Print; SMS | Community            | 7.4                          | 7.4                            | 1                        | single individual sessions; monthly weigh-ins; text messages                                                                                             | 1 hour                                                                                                                       | Yes                                            |

| Study ID   | Groups:                         | Intervention type | Intervention faded in intensity | Features<br>(meal replacements, nutrition education, financial incentives, intermittent fasting, content designed to help participants following programme end) | Provider <sup>a</sup> | Provider training received | Delivery             |                                          | Intervention setting | Intervention timing (months) |                                | Sessions       |                                                                 |                                                                                  | Intervention personalised, titrated or adapted |
|------------|---------------------------------|-------------------|---------------------------------|-----------------------------------------------------------------------------------------------------------------------------------------------------------------|-----------------------|----------------------------|----------------------|------------------------------------------|----------------------|------------------------------|--------------------------------|----------------|-----------------------------------------------------------------|----------------------------------------------------------------------------------|------------------------------------------------|
|            |                                 |                   |                                 |                                                                                                                                                                 |                       |                            | Mode                 | Format                                   |                      | Last contact                 | End (step change in intensity) | N <sup>c</sup> | Frequency                                                       | Length per session with description for varying lengths. (minutes <sup>b</sup> ) |                                                |
| Jolly 2011 | Minimal intervention comparator | Exercise only     | No                              |                                                                                                                                                                 |                       |                            | Individual           | Other                                    | Community            |                              |                                | 12             |                                                                 |                                                                                  | No                                             |
|            | Choice (N/A)                    | N/A               | N/A                             | N/A                                                                                                                                                             | N/A                   | N/A                        | N/A                  | N/A                                      | N/A                  | N/A                          | N/A                            | N/A            | N/A                                                             | N/A                                                                              | N/A                                            |
|            | Pharmacy                        | Diet and exercise | No                              | Nutrition Edu.; Help following programme end                                                                                                                    | Other AHPs            | No                         | Individual           | Face to Face                             | Health Care          | 3                            | 3                              | 12             | Weekly (although may not have taken place weekly in all cases.) | 1st session 30 mins, follow up sessions 15-20 mins                               | Yes                                            |
|            | General practice                | Diet and exercise | No                              | Nutrition Edu.; Help following programme end                                                                                                                    | Nurse (General); GP   | No                         | Individual           | Face to Face                             | Health Care          | 3                            | 3                              | 12             | Weekly (although may not have taken place weekly in all cases.) | 1st session 30 mins, follow up sessions 15-20 mins                               | Yes                                            |
|            | Weight Watchers                 | Diet and exercise | No                              | Nutrition Edu.                                                                                                                                                  | Other                 | Yes                        | Individual and Group | Face to Face                             | Community            | 3                            | 3                              | 12             | Weekly                                                          | 1 hour                                                                           | No                                             |
|            | NHS Size Down                   | Diet and exercise | Yes                             | Nutrition Edu.                                                                                                                                                  | Health Trainer        | Yes                        | Group                | Face to Face                             | Community            | 3                            | 3                              | 8              | Weekly × 6 weeks; drop-in at 9 and 12 weeks.                    | 2 hours for weeks 1-6; Duration of drop in sessions is unclear.                  | No                                             |
|            | Rosemary Conley                 | Diet and exercise | No                              | Nutrition Edu.                                                                                                                                                  | Other                 | Yes                        | Individual and Group | Face to Face; Telephone; Internet        | Community            | 3                            | 3                              | 12             | Weekly                                                          | 1.5 hours                                                                        | Yes                                            |
|            | Slimming world                  | Diet and exercise | No                              | Nutrition Edu.                                                                                                                                                  | Other                 | Yes                        | Individual and Group | Face to Face; Telephone; Internet; Print | Community            | 3                            | 3                              | 12             | Weekly                                                          | 1.5 hours; Duration and frequency of telephone support unclear.                  | Yes                                            |
| Jones 1986 | Individual                      | Diet only         | No                              | Nutrition Edu.; Help following programme end                                                                                                                    | Dietitian             | No                         | Individual           | Face to Face                             | Health Care          |                              | 4                              | 5              | Monthly                                                         | 10                                                                               | Yes                                            |
|            | Group                           | Diet only         | No                              | Nutrition Edu.; Help following programme end                                                                                                                    | Dietitian             | No                         | Individual and Group | Face to Face                             | Health Care          |                              | 4                              | 5              | Monthly                                                         | 60                                                                               | Yes                                            |
|            | Leaflet Individual              | Diet only         | No                              | Nutrition Edu.; Help following programme end                                                                                                                    | Dietitian             | No                         | Individual           | Face to Face; Print                      | Health Care          |                              | 4                              | 5              | Monthly                                                         | 10                                                                               | Yes                                            |

| Study ID    | Groups:                                  | Intervention type | Intervention faded in intensity | Features<br>(meal replacements, nutrition education, financial incentives, intermittent fasting, content designed to help participants following programme end) | Provider <sup>a</sup>     | Provider training received | Delivery             |                         | Intervention setting | Intervention timing (months) |                                | Sessions       |                                                                                                                                              |                                                                                  | Intervention personalized, titrated or adapted |
|-------------|------------------------------------------|-------------------|---------------------------------|-----------------------------------------------------------------------------------------------------------------------------------------------------------------|---------------------------|----------------------------|----------------------|-------------------------|----------------------|------------------------------|--------------------------------|----------------|----------------------------------------------------------------------------------------------------------------------------------------------|----------------------------------------------------------------------------------|------------------------------------------------|
|             |                                          |                   |                                 |                                                                                                                                                                 |                           |                            | Mode                 | Format                  |                      | Last contact                 | End (step change in intensity) | N <sup>c</sup> | Frequency                                                                                                                                    | Length per session with description for varying lengths. (minutes <sup>b</sup> ) |                                                |
|             | Leaflet Group                            | Diet only         | No                              | Nutrition Edu.; Help following programme end                                                                                                                    | Dietitian                 | No                         | Individual and Group | Face to Face; Print     | Health Care          |                              | 4                              | 5              | Monthly                                                                                                                                      | 60                                                                               | Yes                                            |
|             | Diary Individual                         | Diet only         | No                              | Nutrition Edu.; Help following programme end                                                                                                                    | Dietitian                 | No                         | Individual           | Face to Face; Print     | Health Care          |                              | 4                              | 5              | Monthly                                                                                                                                      | 10                                                                               | Yes                                            |
|             | Diary Group                              | Diet only         | No                              | Nutrition Edu.; Help following programme end                                                                                                                    | Dietitian                 | No                         | Individual and Group | Face to Face; Print     | Health Care          |                              | 4                              | 5              | Monthly                                                                                                                                      | 60                                                                               | Yes                                            |
|             | Leaflet Diary Individual                 | Diet only         | No                              | Nutrition Edu.; Help following programme end                                                                                                                    | Dietitian                 | No                         | Individual           | Face to Face; Print     | Health Care          |                              | 4                              | 5              | Monthly                                                                                                                                      | 10                                                                               | Yes                                            |
|             | Leaflet Diary Group                      | Diet only         | No                              | Nutrition Edu.; Help following programme end                                                                                                                    | Dietitian                 | No                         | Individual and Group | Face to Face; Print     | Health Care          |                              | 4                              | 5              | Monthly                                                                                                                                      | 60                                                                               | Yes                                            |
| Jones 1999  | Control Group                            | Control           | No                              |                                                                                                                                                                 | Nurse (General)           | Unclear                    | Individual           | Face to Face            | Community            | 0                            | 0                              | 1              | Single session                                                                                                                               |                                                                                  | No                                             |
|             | Weight Loss Group                        | Diet only         | No                              | Nutrition Edu.                                                                                                                                                  | Dietitian                 | Unclear                    | Individual and Group | Face to Face            | Community            | 30                           | 3                              | 8 + 4 to 9     | Initial session, second session at 2-4 weeks, two monthly group sessions up to 3 months, following which group sessions are every 3-6 months |                                                                                  | Yes                                            |
| Katula 2013 | Enhanced Usual Care Comparison Condition | Diet and exercise | No                              | Nutrition Edu.                                                                                                                                                  | Dietitian                 | Unclear                    | Individual           | Face to Face; Print     | Community            | 24                           |                                | 2              | Both sessions during first 3 months                                                                                                          |                                                                                  | Yes                                            |
|             | Lifestyle Weight-Loss Intervention       | Diet and exercise | Yes                             | Nutrition Edu.; Help following programme end                                                                                                                    | Dietitian; Health Trainer | Yes                        | Individual and Group | Face to Face; Telephone | Community            | 24                           | 6                              | 65             | Months 1-6: Weekly group sessions plus "All participants received three personalized consultations with an RD (during                        |                                                                                  | Yes                                            |

| Study ID      | Groups:                                          | Intervention type | Intervention faded in intensity | Features<br>(meal replacements, nutrition education, financial incentives, intermittent fasting, content designed to help participants following programme end) | Provider <sup>a</sup>                               | Provider training received | Delivery             |                     | Intervention setting | Intervention timing (months) |                                | Sessions       |                                                                                                         |                                                                                  | Intervention personalized, titrated or adapted |
|---------------|--------------------------------------------------|-------------------|---------------------------------|-----------------------------------------------------------------------------------------------------------------------------------------------------------------|-----------------------------------------------------|----------------------------|----------------------|---------------------|----------------------|------------------------------|--------------------------------|----------------|---------------------------------------------------------------------------------------------------------|----------------------------------------------------------------------------------|------------------------------------------------|
|               |                                                  |                   |                                 |                                                                                                                                                                 |                                                     |                            | Mode                 | Format              |                      | Last contact                 | End (step change in intensity) | N <sup>c</sup> | Frequency                                                                                               | Length per session with description for varying lengths. (minutes <sup>b</sup> ) |                                                |
|               |                                                  |                   |                                 |                                                                                                                                                                 |                                                     |                            |                      |                     |                      |                              |                                |                | Months 1, 3, and 6).”;<br>Months 7-24:<br>2 contacts per month, one group session and one phone contact |                                                                                  |                                                |
| Katzer 2008   | Mail-delivered 'non-dieting' program (P3)        | Diet and exercise | Yes                             | Nutrition Edu.; Help following programme end                                                                                                                    |                                                     | No                         | Other – print only   | Print               | Home                 | 2.3                          | 10.3                           | 0              |                                                                                                         |                                                                                  | No                                             |
|               | Group 'non-dieting' program (P2)                 | Diet and exercise | Yes                             | Nutrition Edu.; Help following programme end                                                                                                                    | Psychologist/ Counsellor; Dietitian; Health Trainer | Unclear                    | Group                | Face to Face        | Community            | 2.3                          | 10.3                           | 22             | Weekly for 10 weeks, fortnightly then monthly                                                           | 2 hours                                                                          | No                                             |
|               | Group 'non-dieting' program plus Relaxation (P1) | Diet and exercise | Yes                             | Nutrition Edu.; Help following programme end                                                                                                                    | Psychologist/ Counsellor; Nutritionist              | Unclear                    | Group                | Face to Face; Other | Community; Home      | 2.3                          | 10.3                           | 22             | Weekly for 10 weeks, fortnightly then monthly                                                           | 2 hours                                                                          | No                                             |
| Keogh 2014    | Intermittent dieting                             | Diet only         | No                              | Nutrition Edu.; Inter. Fasting                                                                                                                                  | Dietitian                                           | No                         | Group                | Face to Face        |                      | 2                            | 2                              | 5              | Every second week                                                                                       | The first visit will take approx. an hour; follow up visits will be shorter      | No                                             |
|               | Continuous dieting                               | Diet only         | No                              | Nutrition Edu.                                                                                                                                                  | Dietitian                                           | No                         | Group                | Face to Face        |                      | 2                            | 2                              | 5              | Every second week                                                                                       | The first visit will take approx. an hour; follow up visits will be shorter      | No                                             |
| Kerane n 2009 | Short-term counselling                           | Diet only         | No                              | Nutrition Edu.                                                                                                                                                  | Nurse (Specialist)                                  |                            | Individual           | Face to Face        | Health Care          | 1                            | 1                              | 2              | Fortnightly                                                                                             |                                                                                  | Yes                                            |
|               | Intensive counselling                            | Diet only         | No                              | Nutrition Edu.; Help following programme end                                                                                                                    | Dietitian                                           | Yes                        | Individual and Group | Face to Face        | Health Care          | 4.6                          | 4.6                            | 10             | Fortnightly                                                                                             |                                                                                  | Yes                                            |
|               | Control (N/A)                                    | N/A               | N/A                             | N/A                                                                                                                                                             | N/A                                                 | N/A                        | N/A                  | N/A                 | N/A                  | N/A                          | N/A                            | N/A            | N/A                                                                                                     | N/A                                                                              | N/A                                            |

| Study ID      | Groups:                        | Intervention type | Intervention faded in intensity | Features<br>(meal replacements, nutrition education, financial incentives, intermittent fasting, content designed to help participants following programme end) | Provider <sup>a</sup>    | Provider training received | Delivery             |                     | Intervention setting | Intervention timing (months) |                                | Sessions       |                                                                                                |                                                                                  | Intervention personalized, titrated or adapted |
|---------------|--------------------------------|-------------------|---------------------------------|-----------------------------------------------------------------------------------------------------------------------------------------------------------------|--------------------------|----------------------------|----------------------|---------------------|----------------------|------------------------------|--------------------------------|----------------|------------------------------------------------------------------------------------------------|----------------------------------------------------------------------------------|------------------------------------------------|
|               |                                |                   |                                 |                                                                                                                                                                 |                          |                            | Mode                 | Format              |                      | Last contact                 | End (step change in intensity) | N <sup>c</sup> | Frequency                                                                                      | Length per session with description for varying lengths. (minutes <sup>b</sup> ) |                                                |
| King 1989     | Exercise only                  | Exercise only     |                                 |                                                                                                                                                                 |                          | Unclear                    | Unclear              | Face to Face; Print | Community            |                              | 12                             |                |                                                                                                |                                                                                  | Yes                                            |
|               | Diet only                      | Diet only         |                                 | Nutrition Edu.                                                                                                                                                  | Nutritionist             | Unclear                    | Individual and Group | Face to Face        | Community            |                              | 12                             |                |                                                                                                |                                                                                  | Yes                                            |
| Kingsley 1977 | Social Pressure                | Diet only         | No                              | Nutrition Edu.                                                                                                                                                  | Psychologist/ Counsellor | Yes                        | Group                | Face to Face;       | Community            | 2                            | 2                              | 8              | Weekly                                                                                         | 1 hour                                                                           | No                                             |
|               | Group Behavioural              | Diet only         | Yes                             | Nutrition Edu.; Help following programme end                                                                                                                    | Psychologist/ Counsellor | Yes                        | Group                | Face to Face        | Community            | 2                            | 2                              | 8              | Weekly                                                                                         | 1 hour                                                                           | No                                             |
|               | Individual Behavioural         | Diet only         | No                              | Nutrition Edu.; Help following programme end                                                                                                                    | Psychologist/ Counsellor | Yes                        | Individual           | Face to Face        | Community            | 2                            | 2                              | 8              | Weekly                                                                                         | 1 hour                                                                           | Yes                                            |
|               | Social Pressure – Booster      | Diet only         | Yes                             | Nutrition Edu.                                                                                                                                                  | Psychologist/ Counsellor | Yes                        | Group                | Face to Face        | Community            | 5                            | 2                              | 12             | Weekly until week 8. Then at week 10, 13, 17 and 22.                                           | 1 hour                                                                           | No                                             |
|               | Group Behavioural – Booster    | Diet only         | Yes                             | Nutrition Edu.; Help following programme end                                                                                                                    | Psychologist/ Counsellor | Yes                        | Group                | Face to Face        | Community            | 5                            | 2                              | 12             | Weekly until week 8. Then at week 10, 13, 17 and 22.                                           | 1 hour                                                                           | No                                             |
|               | Individual Behaviour – Booster | Diet only         | Yes                             | Nutrition Edu.; Help following programme end                                                                                                                    | Psychologist/ Counsellor | Yes                        | Individual           | Face to Face        | Community            | 5                            | 2                              | 12             | Weekly until week 8. Then at week 10, 13, 17 and 22.                                           | 1 hour                                                                           | Yes                                            |
| Knauper 2018  | Standard DPP                   | Diet and exercise | Yes                             | Nutrition Edu.                                                                                                                                                  | Health Trainer           | Yes                        | Group                | Face to Face        | Community            | 12                           | 3                              | 22             | 12 weekly core sessions, 4 transitional sessions over 3 months, and 6 monthly support sessions | 1 hour                                                                           |                                                |
|               | Enhanced DPP                   | Diet and exercise | Yes                             | Nutrition Edu.; Help following programme end                                                                                                                    | Health Trainer           | Yes                        | Group                | Face to Face; Print | Community            | 12                           | 3                              | 22             | 12 weekly core sessions, 4 transitional sessions over 3 months, and 6 monthly support sessions | 1 hour                                                                           | Yes                                            |
| Kuller 2012   | Control - health education     | Control           | Yes                             |                                                                                                                                                                 |                          |                            |                      |                     | Community            |                              |                                | 0              |                                                                                                |                                                                                  |                                                |



| Study ID       | Groups:                                                                        | Intervention type | Intervention faded in intensity | Features<br>(meal replacements, nutrition education, financial incentives, intermittent fasting, content designed to help participants following programme end) | Provider <sup>a</sup>                                         | Provider training received | Delivery             |                                      | Intervention setting | Intervention timing (months) |                                | Sessions       |                                                                                                |                                                                                  | Intervention personalised, titrated or adapted |
|----------------|--------------------------------------------------------------------------------|-------------------|---------------------------------|-----------------------------------------------------------------------------------------------------------------------------------------------------------------|---------------------------------------------------------------|----------------------------|----------------------|--------------------------------------|----------------------|------------------------------|--------------------------------|----------------|------------------------------------------------------------------------------------------------|----------------------------------------------------------------------------------|------------------------------------------------|
|                |                                                                                |                   |                                 |                                                                                                                                                                 |                                                               |                            | Mode                 | Format                               |                      | Last contact                 | End (step change in intensity) | N <sup>c</sup> | Frequency                                                                                      | Length per session with description for varying lengths. (minutes <sup>b</sup> ) |                                                |
|                | Intervention - lifestyle change                                                | Diet and exercise | Yes                             | Nutrition Edu.                                                                                                                                                  | Psychologist/ Counsellor; Nutritionist; Exercise physiologist | No                         | Group                | Face to Face                         | Community            | 36                           | 6                              | 64             | 1-6m: weekly<br>6-12m: every 2 weeks<br>12-36m: monthly                                        |                                                                                  | Yes                                            |
| Kumanyika 2012 | Basic programme                                                                | Diet and exercise | No                              | Nutrition Edu.; Help following programme end                                                                                                                    | Nurse (General); Physician; Other AHPs                        | Yes                        | Individual           | Face to Face; Print                  | Health Care; Home    | 12                           | 12                             | 3              | PCP every 4 months. 12 printed session in year 1. 2 printed sessions in year 2.                | 12.5                                                                             | Yes                                            |
|                | Basic plus programme                                                           | Diet and exercise | Yes                             | Nutrition Edu.; Help following programme end                                                                                                                    | Nurse (General); Physician; Other AHPs; Health Trainer        | Yes                        | Individual           | Face to Face; Print                  | Health Care; Home    | 12                           | 12                             | 15             | PCP every 4 months. LC monthly year 1, every other month year 2. 12 printed session in year 1. | 12.5                                                                             | Yes                                            |
| Leahey 2014    | SURI alone                                                                     | Diet and exercise | No                              |                                                                                                                                                                 |                                                               |                            | Other – internet     | Internet; Print                      |                      | 3                            | 3                              | 0              |                                                                                                |                                                                                  | No                                             |
|                | SURI plus Internet behavioral weight loss program                              | Diet and exercise | No                              | Nutrition Edu.                                                                                                                                                  |                                                               |                            | Other - internet     | Face to Face; Internet; Print        | Home                 | 3                            | 3                              | 12             | Weekly                                                                                         | 10 – 15                                                                          | No                                             |
|                | SURI plus Internet behavioral weight loss program plus optional group sessions | Diet and exercise | No                              | Nutrition Edu.                                                                                                                                                  | Health Trainer                                                | No                         | Group                | Face to Face; Internet; Print;       | Community; Home      | 3                            | 3                              | 12             | Weekly                                                                                         | 10 – 15                                                                          | No                                             |
| Leahey 2015    | SURII Internet behavioral weight loss                                          | Diet and exercise | No                              | Nutrition Edu.                                                                                                                                                  |                                                               | No                         | Individual and Group | Face to Face; Internet; Print; Video | Health Care          | 3                            | 3                              | 13             | Weekly                                                                                         |                                                                                  | Yes                                            |
|                | SURII Internet                                                                 | Diet and exercise | No                              | Nutrition Edu.; Fin. Incentives                                                                                                                                 |                                                               | No                         | Individual and Group | Face to Face;                        | Health Care          | 3                            | 3                              | 13             | Weekly                                                                                         |                                                                                  | Yes                                            |

| Study ID     | Groups:                                              | Intervention type | Intervention faded in intensity | Features<br>(meal replacements, nutrition education, financial incentives, intermittent fasting, content designed to help participants following programme end) | Provider <sup>a</sup>            | Provider training received | Delivery             |                                          | Intervention setting | Intervention timing (months) |                                | Sessions       |                                                                 |                                                                                                                                                                                  | Intervention personalized, titrated or adapted |
|--------------|------------------------------------------------------|-------------------|---------------------------------|-----------------------------------------------------------------------------------------------------------------------------------------------------------------|----------------------------------|----------------------------|----------------------|------------------------------------------|----------------------|------------------------------|--------------------------------|----------------|-----------------------------------------------------------------|----------------------------------------------------------------------------------------------------------------------------------------------------------------------------------|------------------------------------------------|
|              |                                                      |                   |                                 |                                                                                                                                                                 |                                  |                            | Mode                 | Format                                   |                      | Last contact                 | End (step change in intensity) | N <sup>c</sup> | Frequency                                                       | Length per session with description for varying lengths. (minutes <sup>b</sup> )                                                                                                 |                                                |
|              | behavioral weight loss incentives                    |                   |                                 |                                                                                                                                                                 |                                  |                            |                      | Internet; Print; Video                   |                      |                              |                                |                |                                                                 |                                                                                                                                                                                  |                                                |
|              | SURII Internet behavioral weight loss 1 group option | Diet and exercise | No                              | Nutrition Edu.                                                                                                                                                  | Dietitian; Exercise physiologist | No                         | Individual and Group | Face to Face; Internet; Print; Video     | Health Care          | 3                            | 3                              | 26             | Weekly group sessions; Weekly videos                            |                                                                                                                                                                                  | Yes                                            |
| Lejeune 2003 | Diet                                                 | Diet only         | Yes                             | MR-P; MR-F; Nutrition Edu.                                                                                                                                      |                                  | Unclear                    | Unclear              | Unclear                                  | Community            | 13                           | 13                             |                |                                                                 |                                                                                                                                                                                  | No                                             |
|              | Diet plus exercise                                   | Diet and exercise | Yes                             | MR-P; MR-F; Nutrition Edu.; Help following programme end                                                                                                        | Personal Trainer                 | Unclear                    | Unclear              | Face to Face; Unclear                    | Community; Home      | 13                           | 13                             | 159            | 4 x per week                                                    | Exercise training programme: 4 x 1 hour/week (They trained four times 1 h/week, three times at the laboratory under the supervision of a professional trainer and once at home.) | No                                             |
| Ley 2004     | Control diet                                         | Control           | No                              |                                                                                                                                                                 |                                  |                            |                      |                                          |                      |                              |                                |                |                                                                 |                                                                                                                                                                                  |                                                |
|              | Reduced-fat                                          | Diet only         |                                 | Nutrition Edu.                                                                                                                                                  |                                  |                            |                      | Face to Face                             |                      | 12                           | 12                             | 12             |                                                                 |                                                                                                                                                                                  |                                                |
| Li 2016      | Usual care group                                     | Control           | Yes                             |                                                                                                                                                                 | Dietitian; Other                 | Yes                        |                      | Print                                    | Inpatient            | 12                           | 1                              | 0              |                                                                 |                                                                                                                                                                                  | Yes                                            |
|              | Diet group                                           | Diet only         | Yes                             | Help following programme end                                                                                                                                    | Dietitian; Other                 | Yes                        | Group                | Face to Face; Telephone; Internet; Print | Inpatient            | 12                           | 1                              | 36             | Six weekly sessions (Month 1); Monthly sessions (Months 1 - 12) |                                                                                                                                                                                  | Yes                                            |
|              | 50g-oats group                                       | Diet only         | Yes                             | Help following programme end                                                                                                                                    | Dietitian; Other                 | Yes                        | Group                | Face to Face; Telephone; Internet; Print | Inpatient            | 12                           | 1                              | 36             | Six weekly sessions (Month 1); Monthly sessions (Months 1 - 12) |                                                                                                                                                                                  | Yes                                            |

| Study ID       | Groups:                                               | Intervention type | Intervention faded in intensity | Features<br>(meal replacements, nutrition education, financial incentives, intermittent fasting, content designed to help participants following programme end) | Provider <sup>a</sup>                                     | Provider training received | Delivery                    |                                          | Intervention setting   | Intervention timing (months) |                                | Sessions       |                                                                 |                                                                                  | Intervention personalized, titrated or adapted |
|----------------|-------------------------------------------------------|-------------------|---------------------------------|-----------------------------------------------------------------------------------------------------------------------------------------------------------------|-----------------------------------------------------------|----------------------------|-----------------------------|------------------------------------------|------------------------|------------------------------|--------------------------------|----------------|-----------------------------------------------------------------|----------------------------------------------------------------------------------|------------------------------------------------|
|                |                                                       |                   |                                 |                                                                                                                                                                 |                                                           |                            | Mode                        | Format                                   |                        | Last contact                 | End (step change in intensity) | N <sup>c</sup> | Frequency                                                       | Length per session with description for varying lengths. (minutes <sup>b</sup> ) |                                                |
|                | 100g-oats group                                       | Diet only         | Yes                             | Help following programme end                                                                                                                                    | Dietitian; Other                                          | Yes                        | Group                       | Face to Face; Telephone; Internet; Print | Inpatient              | 12                           | 1                              | 36             | Six weekly sessions (Month 1); Monthly sessions (Months 1 - 12) |                                                                                  | Yes                                            |
| Li 2005        | Individualized diet plan                              | Diet only         | Yes                             | Nutrition Edu.; Help following programme end                                                                                                                    | Dietitian                                                 | Unclear                    | Individual                  | Face to Face                             | Community              | 12                           | 2                              | 15             | Months 1-2: Every 2 weeks; Months 2-12: Monthly                 |                                                                                  | Yes                                            |
|                | Soy-based meal replacement                            | Diet only         | Yes                             | MR-P; MR-F; Nutrition Edu.; Help following programme end                                                                                                        | Dietitian                                                 | Unclear                    | Individual                  | Face to Face; Other                      | Community              | 12                           | 3                              | 15             | Months 1-2: Every 2 weeks; Months 2-12: Monthly                 |                                                                                  | Yes                                            |
| Lindstrom 2003 | Control                                               | Control           | No                              | Nutrition Edu.                                                                                                                                                  | Nurse (General); Physician; Nutritionist                  | Unclear                    | Other - group or individual | Face to Face; Print                      | Health Care            |                              |                                | 1              |                                                                 | 30 mins to 1 hour                                                                | No                                             |
|                | Intervention                                          | Diet and exercise | Yes                             | MR-P; MR-F; Nutrition Edu.; Help following programme end                                                                                                        | Nurse (General); Physician; Nutritionist; Physiotherapist | Unclear                    | Individual and Group        | Face to Face; Telephone; Print           | Health Care; Community | 48                           | 12                             | 19             | 7 sessions in first year then every 3 months                    | 30 mins to 1 hour                                                                | Yes                                            |
| Liss 2016      | Standard care arm                                     | Diet and exercise | No                              | Nutrition Edu.                                                                                                                                                  | Health care professional (not specified); Other           | No                         | Individual                  | Face to Face; Print                      | Health Care            | 12                           |                                | 3              | Every 6m                                                        | "brief"                                                                          | Yes                                            |
|                | Standard care plus group-based lifestyle intervention | Diet and exercise | Yes                             | Nutrition Edu.; Help following programme end                                                                                                                    | Health Trainer                                            | Yes                        | Individual and Group        | Face to Face; Print                      | Health Care; Community | 12                           | 6                              | 39             | Weekly for 6m; biweekly for next 6m                             | 3 brief; 60-to-90-minute intervention sessions                                   | Yes                                            |
| Little 2016    | Control, Nurse follow-up                              | Diet only         | No                              | Nutrition Edu.                                                                                                                                                  | Nurse (General)                                           | No                         | Other                       | Internet                                 | Home                   |                              |                                |                | Data collection only at 6 and 12 months                         |                                                                                  | No                                             |
|                | Web-based support with minimal                        | Diet and exercise | No                              | Nutrition Edu.; Help following programme end                                                                                                                    | Nurse (General)                                           | Unclear                    | Individual                  | Telephone; Internet; Other               | Home                   | 6                            | 6                              | 29             | 24 web-based sessions designed to be used over 6                |                                                                                  | Yes                                            |

| Study ID  | Groups:                                                | Intervention type | Intervention faded in intensity | Features<br>(meal replacements, nutrition education, financial incentives, intermittent fasting, content designed to help participants following programme end) | Provider <sup>a</sup>               | Provider training received | Delivery   |                                          | Intervention setting | Intervention timing (months) |                                | Sessions       |                                                                                                                                                                                                      |                                                                                  | Intervention personalized, titrated or adapted |
|-----------|--------------------------------------------------------|-------------------|---------------------------------|-----------------------------------------------------------------------------------------------------------------------------------------------------------------|-------------------------------------|----------------------------|------------|------------------------------------------|----------------------|------------------------------|--------------------------------|----------------|------------------------------------------------------------------------------------------------------------------------------------------------------------------------------------------------------|----------------------------------------------------------------------------------|------------------------------------------------|
|           |                                                        |                   |                                 |                                                                                                                                                                 |                                     |                            | Mode       | Format                                   |                      | Last contact                 | End (step change in intensity) | N <sup>c</sup> | Frequency                                                                                                                                                                                            | Length per session with description for varying lengths. (minutes <sup>b</sup> ) |                                                |
|           | support (Remote)                                       |                   |                                 |                                                                                                                                                                 |                                     |                            |            |                                          |                      |                              |                                |                | months. Three scheduled phone or email contacts and up to two optional phone or email contacts in the first 6 months                                                                                 |                                                                                  |                                                |
|           | Web-based + nurse support (face to face)               | Diet and exercise | No                              | Nutrition Edu.; Help following programme end                                                                                                                    | Nurse (General)                     | Unclear                    | Individual | Face to Face; Telephone; Internet; Other | Health Care; Home    | 6                            | 6                              | 31             | 24 web-based sessions designed to be used over 6 months. Three scheduled face-to-face appointments in the first 3 months, and then up to four more appointments during a further 3 months if needed. | Yes                                                                              |                                                |
| Long 1983 | Individual Dietetic Counselling Group                  | Diet and exercise | No                              | Nutrition Edu.                                                                                                                                                  | Dietitian                           | No                         | Individual | Face to Face                             | Health Care          | 4                            | 4                              | 16             | Weekly                                                                                                                                                                                               | 1 x 45-minute session, 15 x 15 minute sessions                                   | No                                             |
|           | Group Dietetic Counselling Group                       | Diet and exercise | No                              | Nutrition Edu.                                                                                                                                                  | Dietitian                           | No                         | Group      | Face to Face                             | Health Care          | 4                            | 4                              | 16             | Weekly                                                                                                                                                                                               | 12 x 1 hour sessions; 4 brief 30 min weigh-ins                                   | No                                             |
|           | Group Dietetic Counselling and behaviour therapy Group | Diet and exercise | No                              | Nutrition Edu.                                                                                                                                                  | Psychologist/ Counsellor; Dietitian | No                         | Group      | Face to Face                             | Health Care          | 4                            | 4                              | 16             | Weekly                                                                                                                                                                                               | 12 x 90 min sessions; 4 x brief 30 min weigh-ins                                 | No                                             |
| Lowe 2018 | Behavior therapy                                       | Diet and exercise |                                 | Nutrition Edu.; Help following programme end                                                                                                                    |                                     | No                         | Group      | Face to Face; Telephone                  |                      | 12                           | 12                             | 39             | Weekly for 6m, then biweekly for 6m                                                                                                                                                                  | 75                                                                               | No                                             |
|           | Behavior therapy plus meal replacements                | Diet and exercise |                                 | MR-P; Nutrition Edu.; Help following programme end                                                                                                              |                                     | No                         | Group      | Face to Face; Telephone                  |                      | 12                           | 12                             | 39             | Weekly for 6 m, then biweekly for 6m                                                                                                                                                                 | 75                                                                               | No                                             |

| Study ID     | Groups:                      | Intervention type | Intervention faded in intensity | Features<br>(meal replacements, nutrition education, financial incentives, intermittent fasting, content designed to help participants following programme end) | Provider <sup>a</sup>                                | Provider training received | Delivery             |                         | Intervention setting | Intervention timing (months) |                                | Sessions       |                                                                                                                                                                                                                                                                                                                                                                                                                 |                                                                                                | Intervention personalised, titrated or adapted |
|--------------|------------------------------|-------------------|---------------------------------|-----------------------------------------------------------------------------------------------------------------------------------------------------------------|------------------------------------------------------|----------------------------|----------------------|-------------------------|----------------------|------------------------------|--------------------------------|----------------|-----------------------------------------------------------------------------------------------------------------------------------------------------------------------------------------------------------------------------------------------------------------------------------------------------------------------------------------------------------------------------------------------------------------|------------------------------------------------------------------------------------------------|------------------------------------------------|
|              |                              |                   |                                 |                                                                                                                                                                 |                                                      |                            | Mode                 | Format                  |                      | Last contact                 | End (step change in intensity) | N <sup>c</sup> | Frequency                                                                                                                                                                                                                                                                                                                                                                                                       | Length per session with description for varying lengths. (minutes <sup>b</sup> )               |                                                |
|              | Home food environment        | Diet and exercise |                                 | Nutrition Edu.; Help following programme end                                                                                                                    | Other                                                | No                         | Group                | Face to Face; Telephone |                      | 12                           | 12                             | 39             | Weekly for 6 m, then biweekly for 6m                                                                                                                                                                                                                                                                                                                                                                            | 75                                                                                             | No                                             |
| Ma 2015      | Control, Enhanced usual care | Control           | No                              |                                                                                                                                                                 | Other AHPs                                           | No                         | Individual           | Print                   | Health Care          |                              |                                | 0              |                                                                                                                                                                                                                                                                                                                                                                                                                 |                                                                                                | No                                             |
|              | Diet and counselling         | Diet and exercise | Yes                             | Nutrition Edu.; Help following programme end                                                                                                                    | Dietitian; Other AHPs; Personal Trainer              | Yes                        | Individual and Group | Face to Face; Telephone | Health Care          | 12                           | 6                              | 18             | Intensive stage: 13 weekly small group sessions over 4 months; Transitional stage: 1 individual counselling session in month 5 and another in month 6; Extended stage: 3 bi-monthly or more phone (participants can initiate contact with interventionists at any point and participants with weight gains of 1.4 to 2.2kg will be telephoned on a biweekly basis until they return to a stable, lower weight). | Group sessions 90-120 mins, transitional phase contacts 30-60 mins; extended sessions variable | Yes                                            |
| Manning 1994 | Clinic visit                 | Diet only         | Yes                             | Nutrition Edu.                                                                                                                                                  | Dietitian                                            | No                         | Individual           | Face to Face            | Health Care          | 12                           | 6                              | 7              | 6 weekly intervals for the first 6 months and then 2 monthly for the remainder of the year.                                                                                                                                                                                                                                                                                                                     |                                                                                                | Yes                                            |
|              | Behavioural                  | Diet only         | Yes                             | Nutrition Edu.                                                                                                                                                  | Psychologist/ Counsellor; Dietitian; Physiotherapist | No                         | Group                | Face to Face            | Health Care          | 12                           | 3                              | 10             | Fortnightly intervals initially for 3 months and then at 2 monthly intervals                                                                                                                                                                                                                                                                                                                                    |                                                                                                | Yes                                            |

| Study ID     | Groups:                                        | Intervention type | Intervention faded in intensity | Features<br>(meal replacements, nutrition education, financial incentives, intermittent fasting, content designed to help participants following programme end) | Provider <sup>a</sup>                                                         | Provider training received | Delivery             |                                          | Intervention setting | Intervention timing (months) |                                | Sessions       |                                                                                             |                                                                                  | Intervention personalized, titrated or adapted |
|--------------|------------------------------------------------|-------------------|---------------------------------|-----------------------------------------------------------------------------------------------------------------------------------------------------------------|-------------------------------------------------------------------------------|----------------------------|----------------------|------------------------------------------|----------------------|------------------------------|--------------------------------|----------------|---------------------------------------------------------------------------------------------|----------------------------------------------------------------------------------|------------------------------------------------|
|              |                                                |                   |                                 |                                                                                                                                                                 |                                                                               |                            | Mode                 | Format                                   |                      | Last contact                 | End (step change in intensity) | N <sup>c</sup> | Frequency                                                                                   | Length per session with description for varying lengths. (minutes <sup>b</sup> ) |                                                |
|              |                                                |                   |                                 |                                                                                                                                                                 |                                                                               |                            |                      |                                          |                      |                              |                                |                | for the remainder of the year.                                                              |                                                                                  |                                                |
|              | Home visits                                    | Diet only         | Yes                             | Nutrition Edu.                                                                                                                                                  | Dietitian                                                                     | No                         | Individual           | Face to Face                             | Health Care; Home    | 12                           | 6                              | 7              | 6 weekly intervals for the first 6 months and then 2 monthly for the remainder of the year. | Yes                                                                              |                                                |
|              | Dexfenfluramine (N/A)                          | N/A               | N/A                             | N/A                                                                                                                                                             | N/A                                                                           | N/A                        | N/A                  | N/A                                      | N/A                  | N/A                          | N/A                            | N/A            | N/A                                                                                         | N/A                                                                              |                                                |
|              | Routine usual care (N/A)                       | N/A               | N/A                             | N/A                                                                                                                                                             | N/A                                                                           | N/A                        | N/A                  | N/A                                      | N/A                  | N/A                          | N/A                            | N/A            | N/A                                                                                         | N/A                                                                              |                                                |
| Manzoni 2016 | Control, Standard behavioral inpatient program | Diet and exercise | No                              | Nutrition Edu.                                                                                                                                                  | Health care professional (not specified)                                      | Unclear                    | Individual and Group | Face to Face; Telephone; Internet        | Inpatient            | 1.4                          | 1.4                            | 6              | Weekly nutritional groups held by dietitians                                                | Yes                                                                              |                                                |
|              | Cognitive-behavioral therapy                   | Diet and exercise | No                              | Nutrition Edu.; Help following programme end                                                                                                                    | Psychologist/ Counsellor; Dietitian; Health care professional (not specified) | Yes                        | Individual and Group | Face to Face; Telephone; Internet        | Inpatient            | 1.4                          | 1.4                            | 21             | Weekly and biweekly                                                                         | Yes                                                                              |                                                |
|              | CBT + Virtual reality                          | Diet and exercise | No                              | Nutrition Edu.; Help following programme end                                                                                                                    | Psychologist/ Counsellor; Dietitian; Health care professional (not specified) | Yes                        | Individual and Group | Face to Face; Telephone; Internet; Other | Inpatient            | 1.4                          | 1.4                            | 36             | Weekly and biweekly                                                                         | 60                                                                               | Yes                                            |
| Marnie 1990  | Control group                                  | Control           | No                              |                                                                                                                                                                 |                                                                               | No                         |                      |                                          |                      |                              |                                | 0              |                                                                                             | No                                                                               |                                                |
|              | Lactovegetarian weight reduction group         | Diet only         | No                              | Nutrition Edu.                                                                                                                                                  | Dietitian                                                                     | No                         | Group                | Face to Face                             |                      | 12                           | 2.5                            | 15             | 10 weekly for 2.5 months and 5 throughout the year                                          | No                                                                               |                                                |

| Study ID      | Groups:                                   | Intervention type | Intervention faded in intensity | Features<br>(meal replacements, nutrition education, financial incentives, intermittent fasting, content designed to help participants following programme end) | Provider <sup>a</sup>                          | Provider training received | Delivery             |                         | Intervention setting | Intervention timing (months) |                                | Sessions       |                                                                                                                                                                                                              |                                                                                  | Intervention personalized, titrated or adapted |
|---------------|-------------------------------------------|-------------------|---------------------------------|-----------------------------------------------------------------------------------------------------------------------------------------------------------------|------------------------------------------------|----------------------------|----------------------|-------------------------|----------------------|------------------------------|--------------------------------|----------------|--------------------------------------------------------------------------------------------------------------------------------------------------------------------------------------------------------------|----------------------------------------------------------------------------------|------------------------------------------------|
|               |                                           |                   |                                 |                                                                                                                                                                 |                                                |                            | Mode                 | Format                  |                      | Last contact                 | End (step change in intensity) | N <sup>c</sup> | Frequency                                                                                                                                                                                                    | Length per session with description for varying lengths. (minutes <sup>b</sup> ) |                                                |
|               | Mixed diet weight reduction               | Diet only         | No                              | Nutrition Edu.                                                                                                                                                  | Dietitian                                      | No                         | Group                | Face to Face;           |                      | 12                           | 2.5                            | 15             | 10 weekly for 2.5 months and 5 throughout the year                                                                                                                                                           |                                                                                  | No                                             |
| Martin 2008   | Control, Standard Care                    | Control           | No                              |                                                                                                                                                                 | Physician                                      | Yes                        |                      |                         |                      |                              |                                | 0              |                                                                                                                                                                                                              |                                                                                  | Yes                                            |
|               | Tailored physician/life style counselling | Diet and exercise | No                              | Nutrition Edu.; Help following programme end                                                                                                                    | Physician                                      | Yes                        | Individual           | Face to Face; Print     | Health Care          | 6                            | 6                              | 6              | Monthly                                                                                                                                                                                                      | 15                                                                               | Yes                                            |
| Mefferd 2007  | Control                                   | Control           | No                              |                                                                                                                                                                 |                                                | Unclear                    | Unclear              |                         |                      |                              |                                |                |                                                                                                                                                                                                              |                                                                                  |                                                |
|               | Intervention                              | Diet and exercise | Yes                             | Nutrition Edu.; Help following programme end                                                                                                                    |                                                | Unclear                    | Individual and Group | Face to Face; Telephone | Health Care          | 4                            | 12                             | 78             | 16 weeks of weekly closed group sessions followed by once-monthly sessions and then monthly sessions for an additional 6 months; Telephone contact: twice weekly during initial two weeks; weekly thereafter |                                                                                  | Yes                                            |
| Melchart 2017 | Control group                             | Diet and exercise | No                              | Nutrition Edu.                                                                                                                                                  | GP                                             | No                         |                      | Face to Face; Print     | Health Care          |                              |                                |                |                                                                                                                                                                                                              |                                                                                  | Yes                                            |
|               | Intervention group                        | Diet and exercise | Yes                             | Nutrition Edu.; Help following programme end                                                                                                                    | Health Trainer                                 | Yes                        | Individual and Group | Face to Face; Internet  | Health Care          | 3                            | 12                             | 17             | 10 weekly; 3 full day 'introduction days' (reduction phase); 4 full day refresh training sessions (maintenance phase)                                                                                        | 7 full-day sessions; 10 x 2 hour sessions                                        | Yes                                            |
| Melin 2003    | Control, less intensively treated         | Diet and exercise | No                              | Nutrition Edu.; Help following programme end                                                                                                                    | Physician; Psychologist/ Counsellor; Dietitian |                            | Group                | Face to Face            | Health Care          | 24                           | 24                             | 27             | 2 x per week during VLCD (2 periods 25 days) + every 3m                                                                                                                                                      |                                                                                  | No                                             |
|               | Intensively treated                       | Diet and exercise | Yes                             | Nutrition Edu.; Help following programme end                                                                                                                    | Physician; Psychologist/                       |                            | Group                | Face to Face            | Health Care          | 12                           | 24                             | 43             | 2 x per week during VLCD (2 periods 25 days) + every                                                                                                                                                         |                                                                                  | No                                             |

| Study ID       | Groups:                               | Intervention type | Intervention faded in intensity | Features<br>(meal replacements, nutrition education, financial incentives, intermittent fasting, content designed to help participants following programme end) | Provider <sup>a</sup>                      | Provider training received | Delivery             |                                | Intervention setting | Intervention timing (months) |                                | Sessions       |                                                                        |                                                                                                                                                                       | Intervention personalized, titrated or adapted |
|----------------|---------------------------------------|-------------------|---------------------------------|-----------------------------------------------------------------------------------------------------------------------------------------------------------------|--------------------------------------------|----------------------------|----------------------|--------------------------------|----------------------|------------------------------|--------------------------------|----------------|------------------------------------------------------------------------|-----------------------------------------------------------------------------------------------------------------------------------------------------------------------|------------------------------------------------|
|                |                                       |                   |                                 |                                                                                                                                                                 |                                            |                            | Mode                 | Format                         |                      | Last contact                 | End (step change in intensity) | N <sup>c</sup> | Frequency                                                              | Length per session with description for varying lengths. (minutes <sup>b</sup> )                                                                                      |                                                |
|                |                                       |                   |                                 |                                                                                                                                                                 | Counsellor; Dietitian                      |                            |                      |                                |                      |                              |                                |                | fortnight during the first year and 6 meetings during the second year. |                                                                                                                                                                       |                                                |
| Menard 2005    | Control - usual care                  | Control           | No                              | Nutrition Edu.                                                                                                                                                  | Physician                                  |                            |                      | Face to Face                   | Health Care          |                              |                                | 6              | Every 6m                                                               | Health ed materials at 6, 12 and 18 mths, plus 3 phone calls                                                                                                          |                                                |
|                | Intervention - intensive multitherapy | Diet and exercise | No                              | Nutrition Edu.                                                                                                                                                  |                                            |                            | Individual           | Face to Face; Telephone; Print | Health Care; Home    | 12                           | 12                             | 36             | 3 x per month                                                          | 1 session plus at least 2 phone calls per month                                                                                                                       | Yes                                            |
| Mengham 1999   | Control                               |                   | No                              | Nutrition Edu.                                                                                                                                                  | Dietitian                                  | Unclear                    | Unclear              | Face to Face                   | Health Care          | 12                           | 12                             | 3              | Six-monthly                                                            | 15                                                                                                                                                                    | Yes                                            |
|                | Intervention                          |                   | No                              | Nutrition Edu.; Help following programme end                                                                                                                    | Dietitian                                  | Unclear                    | Individual and Group | Face to Face                   | Health Care          | 6                            | 12                             | 16             | Fortnightly up to 6 months plus 6 monthly sessions                     | 15 mins standard care sessions; Patients in the intervention group typically received input from the dietitian amounting to 3hrs over the twelve months of the study. | Yes                                            |
| Mensinger 2016 | Control, Weight Neutral Program       | Diet and exercise | No                              | Nutrition Edu.; Help following programme end                                                                                                                    | Psychologist/ Counsellor; Personal Trainer |                            | Group                | Face to Face; Print; Other     | Community            | 6                            | 6                              | 26             | Weekly.                                                                | 90                                                                                                                                                                    |                                                |
|                | Weight Loss Program                   | Diet and exercise | No                              | Nutrition Edu.; Help following programme end                                                                                                                    |                                            |                            | Group                | Face to Face; Print; Other     | Community            | 6                            | 6                              | 26             | Weekly                                                                 | 90                                                                                                                                                                    |                                                |
| Messier 2013   | Exercise only                         | Exercise only     | Yes                             | Help following programme end                                                                                                                                    | Personal Trainer                           | Yes                        | Unclear              | Face to Face; Telephone        | Community            | 18                           | 6                              | 78             | 3 days per week                                                        | 60                                                                                                                                                                    | Yes                                            |
|                | Diet-induced weight loss only         | Diet only         | Yes                             | MR-P; Nutrition Edu.; Help                                                                                                                                      | Nutritionist                               | Yes                        | Individual and Group | Face to Face; Print            | Community            | 18                           | 6                              | 30             | 1-6 Months: individual session                                         |                                                                                                                                                                       | Yes                                            |



| Study ID      | Groups:                                       | Intervention type | Intervention faded in intensity | Features<br>(meal replacements, nutrition education, financial incentives, intermittent fasting, content designed to help participants following programme end) | Provider <sup>a</sup>      | Provider training received | Delivery             |                                | Intervention setting   | Intervention timing (months) |                                | Sessions       |                                                                                                                                                                          |                                                                                  | Intervention personalized, titrated or adapted |
|---------------|-----------------------------------------------|-------------------|---------------------------------|-----------------------------------------------------------------------------------------------------------------------------------------------------------------|----------------------------|----------------------------|----------------------|--------------------------------|------------------------|------------------------------|--------------------------------|----------------|--------------------------------------------------------------------------------------------------------------------------------------------------------------------------|----------------------------------------------------------------------------------|------------------------------------------------|
|               |                                               |                   |                                 |                                                                                                                                                                 |                            |                            | Mode                 | Format                         |                        | Last contact                 | End (step change in intensity) | N <sup>c</sup> | Frequency                                                                                                                                                                | Length per session with description for varying lengths. (minutes <sup>b</sup> ) |                                                |
|               |                                               |                   |                                 | following programme end                                                                                                                                         |                            |                            |                      |                                |                        |                              |                                |                | and 3 group sessions per month;<br>7-18 Months: biweekly group sessions and an individual session every 2 months                                                         |                                                                                  |                                                |
|               | Diet-induced weight loss plus exercise        | Diet and exercise | Yes                             | MR-P; Nutrition Edu.; Help following programme end                                                                                                              | Nutritionist               | Yes                        | Individual and Group | Face to Face; Telephone; Print | Community              | 18                           | 6                              | 108            | 1-6 Months: individual session and 3 group sessions per month; 7-18 Months: biweekly group sessions and an individual session every 2 months plus 3 days/week (exercise) | 60 mins exercise; diet group sessions not reported                               | Yes                                            |
| Miller 2002   | Control Group (Monitoring)                    | Control           | No                              |                                                                                                                                                                 |                            |                            |                      |                                |                        |                              |                                |                |                                                                                                                                                                          |                                                                                  |                                                |
|               | Lifestyle Intervention                        | Diet and exercise | No                              | MR-P; Nutrition Edu.; Help following programme end                                                                                                              | Personal Trainer           |                            | Group                | Face to Face                   | Health Care; Community | 2                            | 2                              |                |                                                                                                                                                                          | 30 to 45 min for the exercise sessions                                           | No                                             |
| Mitsui 2008   | Control                                       | Control           | No                              |                                                                                                                                                                 |                            | Unclear                    | Unclear              |                                | Health Care            |                              |                                | 0              |                                                                                                                                                                          |                                                                                  | No                                             |
|               | Intervention                                  | Diet and exercise | Yes                             | Nutrition Edu.                                                                                                                                                  | Dietitian                  | Unclear                    | Individual and Group | Face to Face                   | Health Care            | 3                            | 12                             | 25             | Weekly: 0-12; Every other week: 13-26; Monthly 26-52 weeks                                                                                                               | Exercise training: 40 minutes; Individual counselling sessions: not reported     | Yes                                            |
| Molenaar 2010 | Nutritional counselling group (diet D, group) | Diet only         | No                              | Nutrition Edu.                                                                                                                                                  | Dietitian                  | No                         | Individual           | Face to Face                   | Health Care            | 12                           | 6                              | 8              | 7 sessions during the 6 months and 1 follow-up session at 12 months                                                                                                      | The initial sessions lasted 40 mins and the rest 20 mins.                        | Yes                                            |
|               | Nutritional plus exercise counselling         | Diet and exercise | No                              | Nutrition Edu.                                                                                                                                                  | Dietitian; Physiotherapist | No                         | Individual           | Face to Face                   | Health Care            | 12                           | 6                              | 15             | Similar to D group PLUS six exercise counselling sessions                                                                                                                | The duration of the diet sessions were identical to                              | Yes                                            |

| Study ID    | Groups:                               | Intervention type | Intervention faded in intensity | Features<br>(meal replacements, nutrition education, financial incentives, intermittent fasting, content designed to help participants following programme end) | Provider <sup>a</sup>       | Provider training received | Delivery             |                               | Intervention setting | Intervention timing (months) |                                | Sessions       |                                                                                                                                                        |                                                                                                                                                                                                                                             | Intervention personalized, titrated or adapted |
|-------------|---------------------------------------|-------------------|---------------------------------|-----------------------------------------------------------------------------------------------------------------------------------------------------------------|-----------------------------|----------------------------|----------------------|-------------------------------|----------------------|------------------------------|--------------------------------|----------------|--------------------------------------------------------------------------------------------------------------------------------------------------------|---------------------------------------------------------------------------------------------------------------------------------------------------------------------------------------------------------------------------------------------|------------------------------------------------|
|             |                                       |                   |                                 |                                                                                                                                                                 |                             |                            | Mode                 | Format                        |                      | Last contact                 | End (step change in intensity) | N <sup>c</sup> | Frequency                                                                                                                                              | Length per session with description for varying lengths. (minutes <sup>b</sup> )                                                                                                                                                            |                                                |
|             | group (diet + exercise (D + E) group) |                   |                                 |                                                                                                                                                                 |                             |                            |                      |                               |                      |                              |                                |                | during the first 6 months and a follow-up session at 12 months.                                                                                        | D groups plus exercise sessions: The duration of the initial counselling session was assumed to be 45 to 60 minutes and later sessions 30 minutes.                                                                                          |                                                |
| Moreno 2014 | Low-calorie diet                      | Diet and exercise | Yes                             | Nutrition Edu.                                                                                                                                                  | Physician; Dietitian; Other | No                         | Individual and Group | Face to Face; Telephone       | Health Care          | 12                           | 12                             | 9              | LC diet. Group meetings took place at 0.5, 2, 4, 6, 8, 10, and 12 months                                                                               |                                                                                                                                                                                                                                             | Yes                                            |
|             | Very low-calorie-ketogenic diet       | Diet and exercise | Yes                             | MR-P; Nutrition Edu.                                                                                                                                            | Physician; Dietitian; Other | No                         | Other                | Face to Face; Telephone       | Health Care          | 12                           | 2                              | 9              | VLCK diet up to 2m (45-60 days). Meetings same as LCD group                                                                                            |                                                                                                                                                                                                                                             | Yes                                            |
| Morgan 2010 | Control (Information and self-help)   | Control           | No                              | Nutrition Edu.                                                                                                                                                  | Other                       | Unclear                    | Group                | Face to Face; Print           | Community            |                              |                                | 1              | Once                                                                                                                                                   | 60                                                                                                                                                                                                                                          | No                                             |
|             | SHED-IT (Internet) group              | Diet and exercise | Yes                             | Nutrition Edu.                                                                                                                                                  | Other                       | Unclear                    | Individual and Group | Face to Face; Internet; Print | Community; Home      | 3                            | 3                              | 8              | Submit online daily eating and exercise diaries for the first 4 weeks, for 2 weeks in the second month and for 1 week in the third month. 7 x feedback | 1st session face to face group- 75 mins. The rest internet. 7 feedback sessions. Submit online daily eating and exercise diaries for the first 4 weeks, for 2 weeks in the second month and for 1 week in the third month. 28 + 14 + 7 = 49 | Yes                                            |

| Study ID    | Groups:             | Intervention type | Intervention faded in intensity | Features<br>(meal replacements, nutrition education, financial incentives, intermittent fasting, content designed to help participants following programme end) | Provider <sup>a</sup>                          | Provider training received | Delivery   |                     | Intervention setting | Intervention timing (months) |                                | Sessions       |                                                                                                                                               |                                                                                  | Intervention personalized, titrated or adapted |
|-------------|---------------------|-------------------|---------------------------------|-----------------------------------------------------------------------------------------------------------------------------------------------------------------|------------------------------------------------|----------------------------|------------|---------------------|----------------------|------------------------------|--------------------------------|----------------|-----------------------------------------------------------------------------------------------------------------------------------------------|----------------------------------------------------------------------------------|------------------------------------------------|
|             |                     |                   |                                 |                                                                                                                                                                 |                                                |                            | Mode       | Format              |                      | Last contact                 | End (step change in intensity) | N <sup>c</sup> | Frequency                                                                                                                                     | Length per session with description for varying lengths. (minutes <sup>b</sup> ) |                                                |
| Muggia 2014 | Standard care group | Diet only         | No                              | Nutrition Edu.                                                                                                                                                  |                                                | No                         | Individual | Print               | Home                 | 12                           | 6                              | 7              | Control meetings every 3 months during the first year and every 6 months during the second year                                               | 30                                                                               | No                                             |
|             | Brief CBT group     | Diet only         | No                              | Nutrition Edu.                                                                                                                                                  |                                                | No                         | Group      | Face to Face; Print | Health Care          | 12                           | 6                              | 14             | 7 treatment sessions in a monthly basis. Then control meetings every 3 months during the first year and every 6 months during the second year | 90                                                                               | No                                             |
| Munsh 2003  | GP control          | Control           | No                              |                                                                                                                                                                 | GP                                             | Yes                        | Unclear    | Face to Face        | Health Care          |                              |                                |                |                                                                                                                                               |                                                                                  | No                                             |
|             | Clinic BASEL        | Diet and exercise | No                              | Nutrition Edu.                                                                                                                                                  | Physician; Psychologist/ Counsellor; Dietitian | Yes                        | Group      | Face to Face; Print | Health Care          | 4                            | 4                              | 16             | Weekly                                                                                                                                        | 90                                                                               | No                                             |
|             | GP BASEL            | Diet and exercise | No                              | Nutrition Edu.                                                                                                                                                  | Physician; Other                               | Yes                        | Group      | Face to Face; Print | Health Care          | 4                            | 4                              | 16             | Weekly                                                                                                                                        | 90                                                                               | No                                             |
| Munsh 2007  | Group BWLT          | Diet and exercise | Yes                             | Nutrition Edu.; Help following programme end                                                                                                                    | Psychologist/ Counsellor                       | Yes                        | Group      | Face to Face        | Community            | 16                           | 4                              | 22             | 16 weekly sessions; 6 monthly sessions - The last session took place 12 months after the end of active treatment.                             | 90                                                                               | Yes                                            |
|             | Group CBT           | Diet only         | Yes                             | Nutrition Edu.; Help following programme end                                                                                                                    | Psychologist/ Counsellor                       | Yes                        | Group      | Face to Face        | Community            | 16                           | 4                              | 22             | 16 weekly sessions; 6 monthly sessions - The last session took place 12 months after the end of active treatment.                             | 90                                                                               | Yes                                            |
| Murphy 1982 | Waiting list (N/A)  | N/A               | N/A                             | N/A                                                                                                                                                             | N/A                                            | N/A                        | N/A        | N/A                 | N/A                  | N/A                          | N/A                            | N/A            | N/A                                                                                                                                           | N/A                                                                              | N/A                                            |

| Study ID       | Groups:             | Intervention type | Intervention faded in intensity | Features<br>(meal replacements, nutrition education, financial incentives, intermittent fasting, content designed to help participants following programme end) | Provider <sup>a</sup>    | Provider training received | Delivery   |                     | Intervention setting | Intervention timing (months) |                                | Sessions       |                                                                                            |                                                                                  | Intervention personalised, titrated or adapted |
|----------------|---------------------|-------------------|---------------------------------|-----------------------------------------------------------------------------------------------------------------------------------------------------------------|--------------------------|----------------------------|------------|---------------------|----------------------|------------------------------|--------------------------------|----------------|--------------------------------------------------------------------------------------------|----------------------------------------------------------------------------------|------------------------------------------------|
|                |                     |                   |                                 |                                                                                                                                                                 |                          |                            | Mode       | Format              |                      | Last contact                 | End (step change in intensity) | N <sup>c</sup> | Frequency                                                                                  | Length per session with description for varying lengths. (minutes <sup>b</sup> ) |                                                |
|                | Supportive          | Diet only         | No                              | Nutrition Edu.; Help following programme end                                                                                                                    | Psychologist/ Counsellor | No                         | Group      | Face to Face        |                      | 24                           | 2.5                            | 19             | Weekly and 8 post-treatment sessions (at 2, 5, 8, 12, 19, and 26 weeks, and 1 and 2 years) | 1.5 hours                                                                        | No                                             |
|                | Alone-1 Party       | Diet only         | No                              | Nutrition Edu.; Help following programme end                                                                                                                    | Psychologist/ Counsellor | No                         | Group      | Face to Face; Print |                      | 24                           | 2.5                            | 19             | Weekly and 8 post-treatment sessions (at 2, 5, 8, 12, 19, and 26 weeks, and 1 and 2 years) | 1.5 hours                                                                        | No                                             |
|                | Alone-2 Party       | Diet only         | No                              | Nutrition Edu.; Help following programme end                                                                                                                    | Psychologist/ Counsellor | No                         | Group      | Face to Face; Print |                      | 24                           | 2.5                            | 19             | Weekly and 8 post-treatment sessions (at 2, 5, 8, 12, 19, and 26 weeks, and 1 and 2 years) | 1.5 hours                                                                        | No                                             |
|                | Couple-1 Party      | Diet only         | No                              | Nutrition Edu.; Help following programme end                                                                                                                    | Psychologist/ Counsellor | No                         | Group      | Face to Face; Print |                      | 24                           | 2.5                            | 19             | Weekly and 8 post-treatment sessions (at 2, 5, 8, 12, 19, and 26 weeks, and 1 and 2 years) | 1.5 hours                                                                        | No                                             |
|                | Couple-2 Party      | Diet only         | No                              | Nutrition Edu.; Help following programme end                                                                                                                    | Psychologist/ Counsellor | No                         | Group      | Face to Face; Print |                      | 42                           | 2.5                            | 19             | Weekly and 8 post-treatment sessions (at 2, 5, 8, 12, 19, and 26 weeks, and 1 and 2 years) | 1.5 hours                                                                        | No                                             |
| Nakata 2014    | Control (N/A)       | N/A               | N/A                             | N/A                                                                                                                                                             | N/A                      | N/A                        | N/A        | N/A                 | N/A                  | N/A                          | N/A                            | N/A            | N/A                                                                                        | N/A                                                                              | N/A                                            |
|                | Education-only      | Diet and exercise | No                              | Nutrition Edu.                                                                                                                                                  | Other                    | No                         | Group      | Face to Face; Print | Health Care          | 6                            | 6                              | 1              |                                                                                            | 2 hours                                                                          | No                                             |
|                | Group-based support | Diet and exercise | Yes                             | Nutrition Edu.                                                                                                                                                  | Other                    | Yes                        | Group      | Face to Face; Print | Health Care          | 6                            | 6                              | 8              | Fortnightly (Weeks 1-6); Monthly (Weeks 6 - 22)                                            | 2 hours                                                                          | No                                             |
| Nanchahal 2012 | Usual care control  |                   |                                 | Nutrition Edu.                                                                                                                                                  | GP                       | Yes                        | Individual | Face to Face; Print | Health Care          |                              |                                |                |                                                                                            |                                                                                  | Yes                                            |
|                | CAMWEL Intervention | Diet and exercise | Yes                             | Nutrition Edu.; Help following programme end                                                                                                                    | Health Trainer           | Yes                        | Individual | Face to Face; Print | Health Care          | 6                            | 12                             | 14             | Fortnightly for 12 weeks, 3-weekly to 27 weeks, 4-weekly to 35 weeks and a                 | 30                                                                               | Yes                                            |

| Study ID     | Groups:                        | Intervention type | Intervention faded in intensity | Features<br>(meal replacements, nutrition education, financial incentives, intermittent fasting, content designed to help participants following programme end) | Provider <sup>a</sup>                                      | Provider training received | Delivery             |                                | Intervention setting | Intervention timing (months) |                                | Sessions       |                                                                                                                                      |                                                                                                                                             | Intervention personalized, titrated or adapted |
|--------------|--------------------------------|-------------------|---------------------------------|-----------------------------------------------------------------------------------------------------------------------------------------------------------------|------------------------------------------------------------|----------------------------|----------------------|--------------------------------|----------------------|------------------------------|--------------------------------|----------------|--------------------------------------------------------------------------------------------------------------------------------------|---------------------------------------------------------------------------------------------------------------------------------------------|------------------------------------------------|
|              |                                |                   |                                 |                                                                                                                                                                 |                                                            |                            | Mode                 | Format                         |                      | Last contact                 | End (step change in intensity) | N <sup>c</sup> | Frequency                                                                                                                            | Length per session with description for varying lengths. (minutes <sup>b</sup> )                                                            |                                                |
|              |                                |                   |                                 |                                                                                                                                                                 |                                                            |                            |                      |                                |                      |                              |                                |                | 12-week interval to the last session                                                                                                 |                                                                                                                                             |                                                |
| Ng 2015      | Control group                  | Control           | No                              | Nutrition Edu.                                                                                                                                                  | Physician                                                  | No                         | Individual           | Face to Face                   | Health Care          | 6                            |                                | 2              | Single sessions at baseline and at 6 months                                                                                          |                                                                                                                                             |                                                |
|              | Lifestyle modification program | Diet and exercise | Yes                             | Nutrition Edu.; Help following programme end                                                                                                                    | Dietitian                                                  | No                         | Individual           | Face to Face                   | Health Care          | 12                           | 4                              | 24             | Weekly (Months 1-4); Monthly (Months 5-12)                                                                                           | Encouraged to see an exercise instructor at least once during the program and perform 30 min of aerobic exercise two to three times a week. |                                                |
| Nicklas 2004 | Healthy lifestyle control      | Diet and exercise | No                              | Nutrition Edu.; Help following programme end                                                                                                                    |                                                            | Unclear                    | Group                | Face to Face; Telephone        | Community            | 18                           | 6                              | 12             | Months 1-3: Monthly; Month 4-6: Monthly phone contact; Months 7-18 bimonthly                                                         | 1 hour                                                                                                                                      | No                                             |
|              | Exercise only                  | Exercise only     | Yes                             | Nutrition Edu.; Help following programme end                                                                                                                    | Exercise physiologist                                      | Yes                        | Unclear              | Telephone; Print               | Community            | 18                           | 6                              | 234            | 3 days per week                                                                                                                      | 1 hour                                                                                                                                      | Yes                                            |
|              | Diet only                      | Diet only         | Yes                             | Nutrition Edu.; Help following programme end                                                                                                                    | Psychologist/ Counsellor; Dietitian                        | Yes                        | Individual and Group | Face to Face; Telephone; Print | Community            | 18                           | 6                              | 59             | Months 1-4: Weekly; Months 4-6: Biweekly; Months 6-18: Monthly meetings and phone contacts every 2 weeks.                            |                                                                                                                                             | Yes                                            |
|              | Diet plus exercise             | Diet and exercise | Yes                             | Nutrition Edu.; Help following programme end                                                                                                                    | Psychologist/ Counsellor; Dietitian; Exercise physiologist | Yes                        | Individual and Group | Face to Face; Telephone; Print | Community            | 18                           | 6                              | 293            | Diet component (Months 1-4: Weekly; Months 4-6: Biweekly; Months 6-18: Monthly meetings and phone contacts every 2 weeks.); Exercise | Exercise component: 1 hour                                                                                                                  | Yes                                            |

| Study ID     | Groups:                                 | Intervention type | Intervention faded in intensity | Features (meal replacements, nutrition education, financial incentives, intermittent fasting, content designed to help participants following programme end) | Provider <sup>a</sup>                                         | Provider training received | Delivery             |                     | Intervention setting   | Intervention timing (months) |                                | Sessions       |                                                                       |                                                                                                                  | Intervention personalised, titrated or adapted |
|--------------|-----------------------------------------|-------------------|---------------------------------|--------------------------------------------------------------------------------------------------------------------------------------------------------------|---------------------------------------------------------------|----------------------------|----------------------|---------------------|------------------------|------------------------------|--------------------------------|----------------|-----------------------------------------------------------------------|------------------------------------------------------------------------------------------------------------------|------------------------------------------------|
|              |                                         |                   |                                 |                                                                                                                                                              |                                                               |                            | Mode                 | Format              |                        | Last contact                 | End (step change in intensity) | N <sup>c</sup> | Frequency                                                             | Length per session with description for varying lengths. (minutes <sup>b</sup> )                                 |                                                |
|              |                                         |                   |                                 |                                                                                                                                                              |                                                               |                            |                      |                     |                        |                              |                                |                | component: 3 days per week                                            |                                                                                                                  |                                                |
| Nicklas 2009 | Calorie restriction (CR) Only           | Diet only         | No                              | MR-P; Nutrition Edu.; Help following programme end                                                                                                           | Dietitian;                                                    | Unclear                    | Individual           | Face to Face; Other | Community              | 4.6                          | 17                             | 1              |                                                                       |                                                                                                                  | Yes                                            |
|              | CR + Moderate-Intensity                 | Diet and exercise | No                              | MR-P; Nutrition Edu.; Help following programme end                                                                                                           | Dietitian; Exercise physiologist                              | Unclear                    | Unclear              | Face to Face; Other | Community              | 4.6                          | 17                             | 60             | 3 sessions per week                                                   | 20–25 min the first week to 55 min by the end of the sixth week and thereafter.                                  | Yes                                            |
|              | CR + Vigorous-Intensity                 | Diet and exercise | No                              | MR-P; Nutrition Edu.; Help following programme end                                                                                                           | Dietitian; Exercise physiologist                              | Unclear                    | Unclear              | Face to Face; Other | Community              | 4.6                          | 17                             | 60             | 3 sessions per week                                                   | 10–15 min the first week to 30 min by the end of the sixth week and thereafter                                   | Yes                                            |
| Nilsen 2011  | Control, Individual Physician Group     | Diet and exercise | No                              | Nutrition Edu.                                                                                                                                               | Physician                                                     |                            | Individual           | Face to Face        | Health Care            | 18                           | 18                             | 3              | 6 monthly                                                             |                                                                                                                  |                                                |
|              | Individual Plus Interdisciplinary Group | Diet and exercise | Yes                             | Nutrition Edu.; Help following programme end                                                                                                                 | Nurse (General); Physician; Dietitian; Physiotherapist; Other |                            | Individual and Group | Face to Face        | Health Care; Community | 18                           | 6                              | 11             | Weekly (Weeks 5 to 10. Other sessions at week 3, 16, 20, 26 52 and 78 | 7 sessions of 5 hours; 1 x individual session 30 mins; 3 x physician consultation (30 mins? [3 x exercise test]) | Yes                                            |
| Nordby 2012  | Control                                 | Control           | No                              |                                                                                                                                                              |                                                               | Unclear                    |                      |                     | Community              |                              |                                | 0              |                                                                       |                                                                                                                  | No                                             |
|              | Training and increased diet (N/A)       | N/A               | N/A                             | N/A                                                                                                                                                          | N/A                                                           | N/A                        | N/A                  | N/A                 | N/A                    | N/A                          | N/A                            | N/A            | N/A                                                                   | N/A                                                                                                              | N/A                                            |
|              | Training                                | Exercise only     | No                              |                                                                                                                                                              |                                                               | Unclear                    | Unclear              | Face to Face; Print | Community              | 3                            | 3                              | 12             | Weekly                                                                | 3–4 sessions/week of continuous exercise at moderate intensity; d 3–4 sessions/week of                           | Yes                                            |

| Study ID       | Groups:                       | Intervention type | Intervention faded in intensity | Features<br>(meal replacements, nutrition education, financial incentives, intermittent fasting, content designed to help participants following programme end) | Provider <sup>a</sup>         | Provider training received | Delivery             |                     | Intervention setting | Intervention timing (months) |                                | Sessions       |                                                                                                                                                                                                                    |                                                                                                                                                         | Intervention personalized, titrated or adapted |
|----------------|-------------------------------|-------------------|---------------------------------|-----------------------------------------------------------------------------------------------------------------------------------------------------------------|-------------------------------|----------------------------|----------------------|---------------------|----------------------|------------------------------|--------------------------------|----------------|--------------------------------------------------------------------------------------------------------------------------------------------------------------------------------------------------------------------|---------------------------------------------------------------------------------------------------------------------------------------------------------|------------------------------------------------|
|                |                               |                   |                                 |                                                                                                                                                                 |                               |                            | Mode                 | Format              |                      | Last contact                 | End (step change in intensity) | N <sup>c</sup> | Frequency                                                                                                                                                                                                          | Length per session with description for varying lengths. (minutes <sup>b</sup> )                                                                        |                                                |
|                |                               |                   |                                 |                                                                                                                                                                 |                               |                            |                      |                     |                      |                              |                                |                |                                                                                                                                                                                                                    | continuous exercise with intermittent high intensity training intervals; weekly contact with a supervisor; extra supervision incorporated when required |                                                |
|                | Energy-reduced diet           | Diet only         | No                              | Nutrition Edu.                                                                                                                                                  |                               | Unclear                    | Unclear              | Face to Face        | Community            | 3                            | 3                              | 12             | Weekly                                                                                                                                                                                                             | Weekly contact with a supervisor; extra supervision incorporated when required.                                                                         |                                                |
| Nurkka la 2015 | Control                       | Diet and exercise | No                              | Nutrition Edu.                                                                                                                                                  | Nurse (General)               | Unclear                    | Individual           | Face to Face; Print | Health Care          | 0                            |                                | 1              | Single session                                                                                                                                                                                                     |                                                                                                                                                         | Yes                                            |
|                | Intervention group            | Diet and exercise | No                              | Nutrition Edu.; Help following programme end                                                                                                                    | Nurse (General); Nutritionist | Unclear                    | Individual           | Face to Face        | Health Care          | 36                           | 9                              | 20             | 14 (Year 1); 4 (Year 2); 2 (Year 3)                                                                                                                                                                                |                                                                                                                                                         | Yes                                            |
| Oldroyd 2006   | Control group                 | Control           | No                              |                                                                                                                                                                 |                               |                            |                      |                     |                      |                              |                                |                |                                                                                                                                                                                                                    |                                                                                                                                                         |                                                |
|                | Intervention group            | Diet and exercise | No                              | Nutrition Edu.                                                                                                                                                  | Dietitian; Physiotherapist    | No                         | Individual           | Face to Face; Print | Community            | 24                           | 6                              | 12             | In the first 6 months there were three such appointments at two weekly intervals, followed by three at monthly intervals. There was one after 9 months and five at two monthly intervals between 12 and 24 months. | 15 – 20                                                                                                                                                 | Yes                                            |
| Pan 1997       | Control                       | Control           | No                              | Nutrition Edu.                                                                                                                                                  | Physician                     | Unclear                    | Unclear              | Print               | Health Care          |                              |                                |                |                                                                                                                                                                                                                    |                                                                                                                                                         | No                                             |
|                | Intervention group (Exercise: |                   | Yes                             | Nutrition Edu.                                                                                                                                                  | Physician                     | Unclear                    | Individual and Group | Face to Face; Print | Health Care          | 72                           | 72                             | 30 - 60        | Frequency of group dietary counselling and exercise                                                                                                                                                                |                                                                                                                                                         | Yes                                            |

| Study ID     | Groups:                                                | Intervention type | Intervention faded in intensity | Features (meal replacements, nutrition education, financial incentives, intermittent fasting, content designed to help participants following programme end) | Provider <sup>a</sup> | Provider training received | Delivery |                     | Intervention setting | Intervention timing (months) |                                | Sessions       |                                                                                                                  |                                                                                  | Intervention personalised, titrated or adapted |
|--------------|--------------------------------------------------------|-------------------|---------------------------------|--------------------------------------------------------------------------------------------------------------------------------------------------------------|-----------------------|----------------------------|----------|---------------------|----------------------|------------------------------|--------------------------------|----------------|------------------------------------------------------------------------------------------------------------------|----------------------------------------------------------------------------------|------------------------------------------------|
|              |                                                        |                   |                                 |                                                                                                                                                              |                       |                            | Mode     | Format              |                      | Last contact                 | End (step change in intensity) | N <sup>c</sup> | Frequency                                                                                                        | Length per session with description for varying lengths. (minutes <sup>b</sup> ) |                                                |
|              | n=155; Diet: n = 148; Diet plus exercise: n = 135)     |                   |                                 |                                                                                                                                                              |                       |                            |          |                     |                      |                              |                                |                | sessions: weekly for 1 month, monthly for 3 months, and then once every 3 months for the remainder of the study. |                                                                                  |                                                |
| Parikh 2010  | Control                                                | Control           |                                 |                                                                                                                                                              |                       |                            | Unclear  |                     | Health Care          |                              |                                |                |                                                                                                                  |                                                                                  |                                                |
|              | Intervention                                           | Diet and exercise | No                              | Nutrition Edu.                                                                                                                                               |                       | Yes                        | Group    | Face to Face; Print | Community            | 3                            | 3                              | 8              | 8 sessions over 10 weeks                                                                                         | 1.5 hours                                                                        | No                                             |
| Patel 2016   | Control group                                          | Control           | No                              |                                                                                                                                                              | Other                 | No                         | Unclear  | Internet            | Workplace            |                              |                                |                |                                                                                                                  |                                                                                  | Yes                                            |
|              | Standard premium discount                              |                   | No                              | Fin. Incentives                                                                                                                                              | Other                 | No                         | Unclear  | Internet            | Workplace            | 6                            | 6                              |                |                                                                                                                  |                                                                                  | Yes                                            |
|              | Immediate premium discount                             |                   | No                              | Fin. Incentives                                                                                                                                              | Other                 | No                         | Unclear  | Internet            | Workplace            | 6                            | 6                              |                |                                                                                                                  |                                                                                  | Yes                                            |
|              | Daily lottery incentive                                |                   | No                              | Fin. Incentives                                                                                                                                              | Other                 | No                         | Unclear  | Internet            | Workplace            | 12                           | 12                             |                |                                                                                                                  |                                                                                  | Yes                                            |
| Pavlou 1989a | Balanced caloric-deficit diet plus supervised exercise | Diet and exercise | No                              | Nutrition Edu.                                                                                                                                               |                       | No                         | Group    | Face to Face        |                      | 3                            | 3                              | 48             | Educational sessions: once per week, exercise sessions: 3 times per week                                         | 90 min supervised exercise program                                               | No                                             |
|              | Balanced caloric-deficit diet - No exercise            | Diet only         | No                              | Nutrition Edu.                                                                                                                                               |                       | No                         | Group    | Face to Face        |                      | 3                            | 3                              | 12             | Weekly                                                                                                           |                                                                                  | No                                             |
|              | Protein-sparing modified fast plus supervised exercise | Diet and exercise | No                              | Nutrition Edu.                                                                                                                                               |                       | No                         | Group    | Face to Face        |                      | 3                            | 3                              | 48             | Educational sessions: once per week, exercise sessions: 3 times per week                                         | 90 min supervised exercise program                                               | No                                             |
|              | Protein-sparing modified fast - no exercise            | Diet only         | No                              | Nutrition Edu.                                                                                                                                               |                       | No                         | Group    | Face to Face        |                      | 3                            | 3                              | 12             | Weekly                                                                                                           |                                                                                  | No                                             |



| Study ID     | Groups:                                                | Intervention type | Intervention faded in intensity | Features<br>(meal replacements, nutrition education, financial incentives, intermittent fasting, content designed to help participants following programme end) | Provider <sup>a</sup>    | Provider training received | Delivery |               | Intervention setting | Intervention timing (months) |                                | Sessions       |                                                                          |                                                                                  | Intervention personalised, titrated or adapted |
|--------------|--------------------------------------------------------|-------------------|---------------------------------|-----------------------------------------------------------------------------------------------------------------------------------------------------------------|--------------------------|----------------------------|----------|---------------|----------------------|------------------------------|--------------------------------|----------------|--------------------------------------------------------------------------|----------------------------------------------------------------------------------|------------------------------------------------|
|              |                                                        |                   |                                 |                                                                                                                                                                 |                          |                            | Mode     | Format        |                      | Last contact                 | End (step change in intensity) | N <sup>c</sup> | Frequency                                                                | Length per session with description for varying lengths. (minutes <sup>b</sup> ) |                                                |
| Pavlou 1989b | Balanced caloric-deficit diet - No exercise            | Diet only         | No                              | Nutrition Edu.                                                                                                                                                  |                          |                            | Group    | Face to Face  |                      | 3                            | 3                              | 12             | Weekly                                                                   |                                                                                  |                                                |
|              | Balanced caloric-deficit diet plus supervised exercise | Diet and exercise | No                              | Nutrition Edu.                                                                                                                                                  |                          |                            | Group    | Face to Face  |                      | 3                            | 3                              | 48             | Educational sessions: once per week, exercise sessions: 3 times per week | 90 min supervised exercise program; Not reported for diet                        |                                                |
|              | Protein-sparing modified fast - no exercise            | Diet only         | No                              | Nutrition Edu.                                                                                                                                                  |                          |                            | Group    | Face to Face; |                      | 3                            | 3                              | 12             | Weekly                                                                   |                                                                                  |                                                |
|              | Protein-sparing modified fast plus supervised exercise | Diet and exercise | No                              | Nutrition Edu.                                                                                                                                                  |                          |                            | Group    | Face to Face  |                      | 3                            | 3                              | 48             | Educational sessions: once per week, exercise sessions: 3 times per week | 90 min supervised exercise program; Not reported for diet                        |                                                |
|              | DPC-70 - no exercise                                   | Diet only         | No                              | MR-F; Nutrition Edu.                                                                                                                                            |                          |                            | Group    | Face to Face  |                      | 3                            | 3                              | 12             | Weekly                                                                   |                                                                                  |                                                |
|              | DPC-70 - plus supervised exercise                      | Diet and exercise | No                              | MR-F; Nutrition Edu.                                                                                                                                            |                          |                            | Group    | Face to Face  |                      | 3                            | 3                              | 48             | Educational sessions: once per week, exercise sessions: 3 times per week | 90 min supervised exercise program; Not reported for diet                        |                                                |
|              | DPC 800 - no exercise                                  | Diet only         | No                              | MR-F; Nutrition Edu.                                                                                                                                            |                          |                            | Group    | Face to Face  |                      | 3                            | 3                              | 12             | Weekly                                                                   |                                                                                  |                                                |
|              | DPC 800 plus supervised exercise                       | Diet and exercise | No                              | MR-F; Nutrition Edu.                                                                                                                                            |                          |                            | Group    | Face to Face  |                      | 3                            | 3                              | 48             | Educational sessions: once per week, exercise sessions: 3 times per week | 90 min supervised exercise program; Not reported for diet                        |                                                |
| Pearce 1981  | Alternative treatment                                  | Diet only         | No                              | Nutrition Edu.; Fin. Incentives                                                                                                                                 | Psychologist/ Counsellor | Yes                        | Unclear  | Face to Face  | Community            | 2.3                          | 14.3                           | 10             | Weekly                                                                   | Approx. 60 mins                                                                  |                                                |
|              | Wives alone                                            | Diet and exercise | No                              | Nutrition Edu.; Fin. Incentives                                                                                                                                 | Psychologist/ Counsellor | Yes                        | Unclear  | Face to Face; | Community            | 2.3                          | 14.3                           | 10             | Weekly                                                                   | Approx. 60 mins                                                                  | Yes                                            |

| Study ID      | Groups:                                           | Intervention type | Intervention faded in intensity | Features (meal replacements, nutrition education, financial incentives, intermittent fasting, content designed to help participants following programme end) | Provider <sup>a</sup>                | Provider training received | Delivery             |                                | Intervention setting | Intervention timing (months) |                                | Sessions       |                                                                                                                    |                                                                                  | Intervention personalized, titrated or adapted |
|---------------|---------------------------------------------------|-------------------|---------------------------------|--------------------------------------------------------------------------------------------------------------------------------------------------------------|--------------------------------------|----------------------------|----------------------|--------------------------------|----------------------|------------------------------|--------------------------------|----------------|--------------------------------------------------------------------------------------------------------------------|----------------------------------------------------------------------------------|------------------------------------------------|
|               |                                                   |                   |                                 |                                                                                                                                                              |                                      |                            | Mode                 | Format                         |                      | Last contact                 | End (step change in intensity) | N <sup>c</sup> | Frequency                                                                                                          | Length per session with description for varying lengths. (minutes <sup>b</sup> ) |                                                |
| Pedersen 2013 | Aerobic interval training                         | Exercise only     | Yes                             | Nutrition Edu.; Help following programme end                                                                                                                 | Physiotherapist                      | Unclear                    | Group                | Face to Face                   | Community            | 12                           | 3                              | 116            | Three times a week for 12 weeks; twice weekly for 40 weeks.                                                        | 38                                                                               |                                                |
|               | Low energy diet                                   | Diet and exercise | Yes                             | MR-P; Nutrition Edu.; Help following programme end                                                                                                           | Dietitian                            | Unclear                    | Individual and Group | Face to Face                   | Community            | 12                           | 3                              | 96             | Fortnightly dietitian sessions (Weeks 1-12); Monthly (Weeks 12 – 52); Twice weekly exercise sessions for 40 weeks. | Exercise sessions: 38 mins; Dietitian sessions not reported                      |                                                |
| Pekkari 2015  | Control, Follow up without intervention           | Diet and exercise | No                              | MR-F; Nutrition Edu.; Help following programme end                                                                                                           | Nurse (General); Nutritionist; Other | Yes                        | Group                | Face to Face; Print            | Health Care          | 4                            | 4                              | 17             | Weekly                                                                                                             | 1.5 hours                                                                        |                                                |
|               | One-year maintenance program                      | Diet and exercise | Yes                             | MR-F; Nutrition Edu.; Help following programme end                                                                                                           | Nurse (General); Nutritionist; Other | Yes                        | Group                | Face to Face; Print            | Health Care          | 16                           | 4                              | 29             | Weekly and the monthly.                                                                                            | 1.5 hours                                                                        |                                                |
| Perri 1984    | Non-behavioural therapy                           | Control           | No                              | Nutrition Edu.                                                                                                                                               | Psychologist/ Counsellor             | No                         | Group                | Face to Face                   | Community            | 3                            | 3                              | 18             | 15 weekly and 3 post-treatment fu                                                                                  | 2 hours                                                                          | No                                             |
|               | Non-behavior therapy plus post-treatment contact  | Diet only         | No                              | Nutrition Edu.; Help following programme end                                                                                                                 | Psychologist/ Counsellor             | No                         | Group                | Face to Face; Telephone; Print | Community            | 9                            | 3                              | 18             | 15 weekly and 3 post-treatment fu PLUS 5-10min phone calls up to 9 months                                          | 2 hours                                                                          | No                                             |
|               | Behavior therapy                                  | Diet only         | No                              | Nutrition Edu.                                                                                                                                               | Psychologist/ Counsellor             | No                         | Group                | Face to Face                   | Community            | 3                            | 3                              | 18             | 15 weekly and 3 post-treatment fu                                                                                  | 2 hours                                                                          | No                                             |
|               | Behavior therapy plus relapse prevention training | Diet only         | No                              | Nutrition Edu.                                                                                                                                               | Psychologist/ Counsellor             | No                         | Group                | Face to Face; Telephone        | Community            | 3                            | 3                              | 18             | 15 weekly and 3 post-treatment fu                                                                                  | 2 hours                                                                          | No                                             |
|               | Behavior therapy plus post-                       | Diet only         | No                              | Nutrition Edu.; Help following programme end                                                                                                                 | Psychologist/ Counsellor             | No                         | Group                | Face to Face; Telephone; Print | Community            | 9                            | 3                              | 18             | 15 weekly and 3 post-treatment fu PLUS 5-10min                                                                     | 2 hours                                                                          | No                                             |

| Study ID   | Groups:                                                                       | Intervention type | Intervention faded in intensity | Features<br>(meal replacements, nutrition education, financial incentives, intermittent fasting, content designed to help participants following programme end) | Provider <sup>a</sup>                     | Provider training received | Delivery             |                                | Intervention setting | Intervention timing (months) |                                | Sessions                   |                                                                                                   |                                                                                                                                                                                                                                         | Intervention personalized, titrated or adapted |
|------------|-------------------------------------------------------------------------------|-------------------|---------------------------------|-----------------------------------------------------------------------------------------------------------------------------------------------------------------|-------------------------------------------|----------------------------|----------------------|--------------------------------|----------------------|------------------------------|--------------------------------|----------------------------|---------------------------------------------------------------------------------------------------|-----------------------------------------------------------------------------------------------------------------------------------------------------------------------------------------------------------------------------------------|------------------------------------------------|
|            |                                                                               |                   |                                 |                                                                                                                                                                 |                                           |                            | Mode                 | Format                         |                      | Last contact                 | End (step change in intensity) | N <sup>c</sup>             | Frequency                                                                                         | Length per session with description for varying lengths. (minutes <sup>b</sup> )                                                                                                                                                        |                                                |
|            | treatment contact                                                             |                   |                                 |                                                                                                                                                                 |                                           |                            |                      |                                |                      |                              |                                | phone calls up to 9 months |                                                                                                   |                                                                                                                                                                                                                                         |                                                |
|            | Behavior therapy plus relapse prevention training plus post-treatment contact | Diet only         | No                              | Nutrition Edu.; Help following programme end                                                                                                                    | Psychologist/ Counsellor                  | No                         | Group                | Face to Face; Telephone; Print | Community            | 9                            | 3                              | 18                         | 15 weekly and 3 post-treatment phone calls up to 9 months PLUS 5-10min phone calls up to 9 months | 2 hours                                                                                                                                                                                                                                 | No                                             |
| Perri 1986 | Behavior therapy                                                              | Diet and exercise | No                              | Nutrition Edu.; Fin. Incentives                                                                                                                                 | Psychologist/ Counsellor                  | Yes                        | Group                | Face to Face; Print            | Community            | 4.6                          | 4.6                            | 20                         | Weeks 1-20: Weekly                                                                                | Group therapy sessions: 2 hours                                                                                                                                                                                                         | No                                             |
|            | Behavior therapy plus maintenance                                             | Diet and exercise | Yes                             | Nutrition Edu.; Fin. Incentives; Help following programme end                                                                                                   | Nurse (General); Psychologist/ Counsellor | Yes                        | Individual and Group | Face to Face; Telephone; Print | Community            | 16.6                         | 16.6                           | 98                         | Weekly                                                                                            | Group therapy sessions: 2 hours<br>Client-therapist telephone contacts were scheduled to occur weekly during the 12 months following treatment. Buddy groups were encouraged to meet twice a month during the year following treatment. | Yes                                            |
|            | Behavior therapy plus aerobic exercise                                        | Diet and exercise | No                              | Nutrition Edu.; Fin. Incentives                                                                                                                                 | Nurse (General); Psychologist/ Counsellor | Yes                        | Group                | Face to Face Print             | Community            | 4.6                          | 4.6                            | 32                         | Weeks 1-20: Weekly; Exercise program: weekly                                                      | Group therapy sessions: 2 hours<br>Exercise program goals: Initial levels of exercise were set at a minimum of 32 min per week (8 min per day of stationary cycling, 4 days per week). Weekly increases                                 | Yes                                            |

| Study ID   | Groups:                                                                  | Intervention type | Intervention faded in intensity | Features<br>(meal replacements, nutrition education, financial incentives, intermittent fasting, content designed to help participants following programme end) | Provider <sup>a</sup>                                | Provider training received | Delivery             |                                | Intervention setting | Intervention timing (months) |                                | Sessions       |                        |                                                                                                                                                                                                                                                                                                                                     | Intervention personalized, titrated or adapted |
|------------|--------------------------------------------------------------------------|-------------------|---------------------------------|-----------------------------------------------------------------------------------------------------------------------------------------------------------------|------------------------------------------------------|----------------------------|----------------------|--------------------------------|----------------------|------------------------------|--------------------------------|----------------|------------------------|-------------------------------------------------------------------------------------------------------------------------------------------------------------------------------------------------------------------------------------------------------------------------------------------------------------------------------------|------------------------------------------------|
|            |                                                                          |                   |                                 |                                                                                                                                                                 |                                                      |                            | Mode                 | Format                         |                      | Last contact                 | End (step change in intensity) | N <sup>c</sup> | Frequency              | Length per session with description for varying lengths. (minutes <sup>b</sup> )                                                                                                                                                                                                                                                    |                                                |
|            |                                                                          |                   |                                 |                                                                                                                                                                 |                                                      |                            |                      |                                |                      |                              |                                |                |                        | of 4 rain were scheduled over 12 consecutive weeks to a target level of 80 min per week (20 rain per day, 4 days per week).                                                                                                                                                                                                         |                                                |
|            | Behavior therapy behavior therapy plus aerobic exercise plus maintenance | Diet and exercise | Yes                             | Nutrition Edu.; Fin. Incentives; Help following programme end                                                                                                   | Nurse (General); Psychologist/ Counsellor            | Yes                        | Individual and Group | Face to Face; Telephone; Print | Community            | 16.6                         | 16.6                           | 110            | Weekly                 | Group therapy sessions: 2 hours<br>Exercise program goals: Initial levels of exercise were set at a minimum of 32 min per week (8 min per day of stationary cycling, 4 days per week). Weekly increases of 4 rain were scheduled over 12 consecutive weeks to a target level of 80 min per week (20 rain per day, 4 days per week). | Yes                                            |
| Perri 1987 | Behavior therapy only                                                    | Diet and exercise | No                              | Nutrition Edu.                                                                                                                                                  | Nurse (General); Physician; Psychologist/ Counsellor | Unclear                    | Group                | Face to Face                   | Community            | 4.6                          |                                | 20             |                        |                                                                                                                                                                                                                                                                                                                                     | No                                             |
|            | Behavior therapy plus a peer self-help group maintenance program         | Diet and exercise | Yes                             | Nutrition Edu.; Help following programme end                                                                                                                    | Nurse (General); Physician; Psychologist/ Counsellor | Unclear                    | Group                | Face to Face                   | Community            | 7                            | 7                              | 35             | 20 weekly; 15 biweekly |                                                                                                                                                                                                                                                                                                                                     | No                                             |

| Study ID   | Groups:                                                       | Intervention type | Intervention faded in intensity | Features<br>(meal replacements, nutrition education, financial incentives, intermittent fasting, content designed to help participants following programme end) | Provider <sup>a</sup>                                | Provider training received | Delivery |                         | Intervention setting | Intervention timing (months) |                                | Sessions       |                                                                                                                    |                                                                                  | Intervention personalized, titrated or adapted |
|------------|---------------------------------------------------------------|-------------------|---------------------------------|-----------------------------------------------------------------------------------------------------------------------------------------------------------------|------------------------------------------------------|----------------------------|----------|-------------------------|----------------------|------------------------------|--------------------------------|----------------|--------------------------------------------------------------------------------------------------------------------|----------------------------------------------------------------------------------|------------------------------------------------|
|            |                                                               |                   |                                 |                                                                                                                                                                 |                                                      |                            | Mode     | Format                  |                      | Last contact                 | End (step change in intensity) | N <sup>c</sup> | Frequency                                                                                                          | Length per session with description for varying lengths. (minutes <sup>b</sup> ) |                                                |
|            | Behavior therapy plus a therapist-contact maintenance program | Diet and exercise | Yes                             | Nutrition Edu.; Help following programme end                                                                                                                    | Nurse (General); Physician; Psychologist/ Counsellor | Unclear                    | Group    | Face to Face            | Community            | 7                            | 7                              | 35             | 20 weekly; 15 biweekly                                                                                             |                                                                                  | Yes                                            |
| Perri 1989 | Standard treatment group                                      | Diet and exercise | No                              |                                                                                                                                                                 | Psychologist/ Counsellor                             | No                         | Group    | Face to Face            | Community            | 5                            | 5                              | 20             | Weekly                                                                                                             |                                                                                  | No                                             |
|            | Extended treatment regimen                                    | Diet and exercise | No                              |                                                                                                                                                                 | Psychologist/ Counsellor                             | No                         | Group    | Face to Face            | Community            | 10                           | 10                             | 40             | Weekly                                                                                                             |                                                                                  | No                                             |
| Perri 1997 | WL + Home-based exercise                                      | Diet and exercise | Yes                             | Nutrition Edu.; Help following programme end                                                                                                                    | Psychologist/ Counsellor                             | Yes                        | Group    | Face to Face; Print     | Community            | 12                           | 12                             | 39             | WL sessions (26 weekly, 13 biweekly)                                                                               | 2-hour WL sessions. 30 min of exercise on 5 days per week                        | No                                             |
|            | WL + Group-based exercise                                     | Diet and exercise | Yes                             | Nutrition Edu.; Help following programme end                                                                                                                    | Psychologist/ Counsellor; Health Trainer             | Yes                        | Group    | Face to Face            | Community            | 12                           | 12                             | 169            | WL sessions (26 weekly, 13 biweekly); Exercise sessions: 3 x weekly (0-26 weeks); 2 x weekly sessions (27-52 week) | 2-hour WL sessions; 30 min of exercise on 5 days per week                        | No                                             |
| Perri 2001 | Control, Standard Behavioural Therapy (BT)                    | Diet and exercise | No                              | Nutrition Edu.                                                                                                                                                  | Psychologist/ Counsellor                             |                            | Group    | Face to Face            | Community            | 5                            | 5                              | 20             | Weekly                                                                                                             | 2 hours                                                                          |                                                |
|            | BT + Relapse prevention training                              | Diet and exercise | Yes                             | Nutrition Edu.; Help following programme end                                                                                                                    | Psychologist/ Counsellor                             |                            | Group    | Face to Face; Print     | Community            | 17                           | 5                              | 46             | Weekly and biweekly                                                                                                | 2 hours                                                                          | Yes                                            |
|            | BT + problem-solving therapy                                  | Diet and exercise | Yes                             | Help following programme end                                                                                                                                    | Psychologist/ Counsellor                             |                            | Group    | Face to Face; Print     | Community            | 17                           | 5                              | 46             | Weekly and biweekly                                                                                                | 2 hours                                                                          | Yes                                            |
| Perri 2014 | Control, Education group                                      | Diet and exercise |                                 | Nutrition Edu.                                                                                                                                                  | Other                                                | Yes                        | Group    | Face to Face; Telephone | Community; Home      | 24                           | 6                              | 21             | Weekly                                                                                                             |                                                                                  | No                                             |

| Study ID     | Groups:                                                   | Intervention type | Intervention faded in intensity | Features<br>(meal replacements, nutrition education, financial incentives, intermittent fasting, content designed to help participants following programme end) | Provider <sup>a</sup>                               | Provider training received | Delivery             |                                | Intervention setting | Intervention timing (months) |                                | Sessions       |                                           |                                                                                  | Intervention personalized, titrated or adapted |
|--------------|-----------------------------------------------------------|-------------------|---------------------------------|-----------------------------------------------------------------------------------------------------------------------------------------------------------------|-----------------------------------------------------|----------------------------|----------------------|--------------------------------|----------------------|------------------------------|--------------------------------|----------------|-------------------------------------------|----------------------------------------------------------------------------------|------------------------------------------------|
|              |                                                           |                   |                                 |                                                                                                                                                                 |                                                     |                            | Mode                 | Format                         |                      | Last contact                 | End (step change in intensity) | N <sup>c</sup> | Frequency                                 | Length per session with description for varying lengths. (minutes <sup>b</sup> ) |                                                |
|              | Low dose, (low intensity lifestyle counselling)           | Diet and exercise | Yes                             | Nutrition Edu.; Help following programme end                                                                                                                    | Other                                               | Yes                        | Individual and Group | Face to Face; Telephone        | Community; Home      | 24                           | 6                              | 21             | Weekly                                    |                                                                                  | Yes                                            |
|              | Moderate dose, (Moderate intensity lifestyle counselling) | Diet and exercise | Yes                             | Nutrition Edu.; Help following programme end                                                                                                                    | Other                                               | Yes                        | Individual and Group | Face to Face; Telephone        | Community; Home      | 24                           | 6                              | 42             | Weekly                                    |                                                                                  | Yes                                            |
|              | High dose, (High intensity lifestyle counselling)         | Diet and exercise | Yes                             | Nutrition Edu.; Help following programme end                                                                                                                    | Other                                               | Yes                        | Individual and Group | Face to Face; Telephone        | Community; Home      | 24                           | 6                              | 63             | Weekly                                    |                                                                                  | Yes                                            |
| Pettman 2009 | Control                                                   | Control           | No                              | Nutrition Edu.                                                                                                                                                  |                                                     | No                         | Individual           | Print                          |                      |                              |                                |                |                                           |                                                                                  | No                                             |
|              | Intervention B - Passive follow-up                        | Diet and exercise | No                              | Nutrition Edu.                                                                                                                                                  | Health Trainer                                      | Unclear                    | Group                | Face to Face; Telephone; Other | Community            | 4                            | 12                             | 32             | Weekly group session and exercise session | 2 hour group sessions: 1 hour exercise session.                                  | No                                             |
|              | Intervention A - Active follow-up                         | Diet and exercise | Yes                             | Nutrition Edu.; Help following programme end                                                                                                                    | Health Trainer                                      | Unclear                    | Group                | Face to Face; Telephone; Other | Community            | 4                            | 12                             | 40             | Weekly group session and exercise session | 2 hour group sessions; 1 hour exercise session.                                  | No                                             |
| Poelman 2015 | Control Condition                                         | Control           | No                              |                                                                                                                                                                 |                                                     |                            |                      |                                |                      |                              |                                | 0              |                                           |                                                                                  | No                                             |
|              | Intervention condition                                    | Diet only         | No                              | Nutrition Edu.                                                                                                                                                  | Dietitian; Health care professional (not specified) | No                         | Individual and Group | Face to Face; Internet         | Community            | 12                           | 3                              | 3              | Biweekly                                  | 3 hour cooking class, 8-minute video                                             | No                                             |
| Promrat 2010 | Control                                                   | Diet and exercise | No                              | Nutrition Edu.                                                                                                                                                  | Nutritionist; Health Trainer                        | Unclear                    | Group                | Face to Face                   | Health Care          | 12                           | 12                             | 4              | Once every 12 weeks.                      |                                                                                  |                                                |
|              | Lifestyle Intervention                                    | Diet and exercise | Yes                             | Nutrition Edu.; Help following programme end                                                                                                                    | Nutritionist; Health Trainer                        | Unclear                    | Individual and Group | Face to Face                   | Health Care          | 12                           | 6                              | 36             | Months 1-6: weekly; Months 7-12: biweekly |                                                                                  | Yes                                            |
|              | Control group                                             | Control           | No                              |                                                                                                                                                                 |                                                     |                            |                      |                                |                      |                              |                                |                |                                           |                                                                                  |                                                |

| Study ID        | Groups:                                | Intervention type | Intervention faded in intensity | Features<br>(meal replacements, nutrition education, financial incentives, intermittent fasting, content designed to help participants following programme end) | Provider <sup>a</sup>               | Provider training received | Delivery             |                         | Intervention setting | Intervention timing (months) |                                | Sessions       |                                       |                                                                                                                                                                          | Intervention personalized, titrated or adapted |
|-----------------|----------------------------------------|-------------------|---------------------------------|-----------------------------------------------------------------------------------------------------------------------------------------------------------------|-------------------------------------|----------------------------|----------------------|-------------------------|----------------------|------------------------------|--------------------------------|----------------|---------------------------------------|--------------------------------------------------------------------------------------------------------------------------------------------------------------------------|------------------------------------------------|
|                 |                                        |                   |                                 |                                                                                                                                                                 |                                     |                            | Mode                 | Format                  |                      | Last contact                 | End (step change in intensity) | N <sup>c</sup> | Frequency                             | Length per session with description for varying lengths. (minutes <sup>b</sup> )                                                                                         |                                                |
| Provencher 2009 | Social support                         | Diet only         | No                              | Nutrition Edu.                                                                                                                                                  | Psychologist/ Counsellor; Dietitian | Yes                        | Group                | Face to Face            | Community            | 4                            | 4                              | 14             | Weekly                                | 2 hours                                                                                                                                                                  | Yes                                            |
|                 | Health-At-Every-Size                   | Diet and exercise | No                              | Nutrition Edu.                                                                                                                                                  | Psychologist/ Counsellor; Dietitian | Yes                        | Group                | Face to Face; Print     | Community            | 4                            | 4                              | 14             | Weekly                                | "13 three-hour evening sessions and 1 intensive-day session of 6 hours."                                                                                                 | Yes                                            |
| Ptomey 2018     | Conventional Diet                      | Diet and exercise | Yes                             | Nutrition Edu.; Fin. Incentives                                                                                                                                 | Health Trainer; Other               | Yes                        | Individual           | Face to Face            | Home                 | 18                           | 6                              | 20             | Monthly. Plus baseline and at 2 weeks | Baseline 60-90 mins; 2 weeks: 30mins; Monthly sessions: 45 mins                                                                                                          | Yes                                            |
|                 | Enhanced Stop Light Diet               | Diet and exercise | Yes                             | MR-P; Nutrition Edu.; Fin. Incentives;                                                                                                                          | Health Trainer; Other               | Yes                        | Individual           | Face to Face            | Home                 | 18                           | 6                              | 20             | Monthly. Plus baseline and at 2 weeks | 4Baseline 60-90 mins. 2 weeks 30mins. Monthly sessions 45 mins                                                                                                           |                                                |
| Ramirez 2001    | Weight control only                    | Diet and exercise | No                              | Nutrition Edu.                                                                                                                                                  |                                     | No                         | Group                | Face to Face            | Community            | 4                            | 4                              | 16             | Weekly                                | 1 hour                                                                                                                                                                   | No                                             |
|                 | Weight control plus body image therapy | Diet and exercise | No                              | Nutrition Edu.                                                                                                                                                  | Psychologist/ Counsellor; Dietitian | No                         | Group                | Face to Face; Other     | Community; Home      | 4                            | 4                              | 16             | Weekly                                | 2 hours with the psychologist or predoctoral psychology graduate student, and 1 hour with the dietitian; 12 weeks with 2 hour sessions and 4 weeks with 1 hour sessions. | No                                             |
| Rejeski 2011    | Successful aging control arm           | Control           |                                 |                                                                                                                                                                 |                                     | No                         |                      |                         |                      |                              |                                | 18             |                                       |                                                                                                                                                                          | No                                             |
|                 | Physical activity                      | Exercise only     | Yes                             | Help following programme end                                                                                                                                    | Health Trainer                      | Unclear                    | Individual and Group | Face to Face; Telephone | Community; Home      | 18                           | 6                              | 48             |                                       | Group sessions lasted 90 mins, and individual sessions lasted 30 mins. Phone session and the                                                                             | Yes                                            |

| Study ID       | Groups:                           | Intervention type | Intervention faded in intensity | Features<br>(meal replacements, nutrition education, financial incentives, intermittent fasting, content designed to help participants following programme end) | Provider <sup>a</sup>      | Provider training received | Delivery             |                                   | Intervention setting | Intervention timing (months) |                                | Sessions       |                                                                                                                                 |                                                                                                                                               | Intervention personalized, titrated or adapted |
|----------------|-----------------------------------|-------------------|---------------------------------|-----------------------------------------------------------------------------------------------------------------------------------------------------------------|----------------------------|----------------------------|----------------------|-----------------------------------|----------------------|------------------------------|--------------------------------|----------------|---------------------------------------------------------------------------------------------------------------------------------|-----------------------------------------------------------------------------------------------------------------------------------------------|------------------------------------------------|
|                |                                   |                   |                                 |                                                                                                                                                                 |                            |                            | Mode                 | Format                            |                      | Last contact                 | End (step change in intensity) | N <sup>c</sup> | Frequency                                                                                                                       | Length per session with description for varying lengths. (minutes <sup>b</sup> )                                                              |                                                |
|                |                                   |                   |                                 |                                                                                                                                                                 |                            |                            |                      |                                   |                      |                              |                                |                |                                                                                                                                 | last group session lasted 10-20 mins.                                                                                                         |                                                |
|                | Weight loss and physical activity | Diet and exercise | Yes                             | Nutrition Edu.; Help following programme end                                                                                                                    | Dietitian; Health Trainer  | Unclear                    | Individual and Group | Face to Face; Telephone           | Community; Home      | 18                           | 6                              | 48             |                                                                                                                                 |                                                                                                                                               | Yes                                            |
| Ridge way 1999 | Control                           | Control           | No                              |                                                                                                                                                                 |                            | No                         |                      |                                   |                      |                              |                                |                |                                                                                                                                 |                                                                                                                                               | No                                             |
|                | Intervention Group                | Diet and exercise | No                              | Nutrition Edu.                                                                                                                                                  | Nurse (General); Dietitian | Unclear                    | Individual and Group | Face to Face; Print               | Health Care          | 12                           | 6                              | 7              | Monthly; Plus single follow-up session at 12 months                                                                             | 90 minutes group sessions                                                                                                                     | Yes                                            |
| Rock 2015      | Control                           | Diet and exercise | Yes                             | Nutrition Edu.                                                                                                                                                  | Other                      | Unclear                    | Individual           | Face to Face; Telephone; Internet | Community            | 6                            | 12                             | 14             | 2 individual sessions (baseline and 6 months); monthly telephone calls and/or e-mails                                           |                                                                                                                                               | Yes                                            |
|                | Intervention                      | Diet and exercise | Yes                             | Nutrition Edu.; Help following programme end                                                                                                                    | Other                      | Unclear                    | Individual and Group | Face to Face; Telephone; Internet | Community            | 6                            | 12                             | 73             | Group sessions: weekly for 4 months; biweekly for two months; monthly for 6 months; Newsletters: quarterly from 6 to 24 months. | 1 hour group sessions; Group sessions were reinforced by brief (10- to 15-minute) personalized guidance delivered by telephone and/or e-mail. | Yes                                            |
| Rolls 2005     | Comparison-control                | Control           | No                              |                                                                                                                                                                 |                            | No                         |                      |                                   |                      |                              |                                |                |                                                                                                                                 |                                                                                                                                               |                                                |
|                | Two snacks                        | Diet and exercise | No                              | MR-P; Nutrition Edu.; Help following programme end                                                                                                              | Dietitian                  | No                         | Individual           | Face to Face                      |                      | 12                           | 6                              | 24             | Weekly from 1 to 3 months, fortnightly 4 to 6 months, and monthly from 7 to 12 months                                           | 15 – 30                                                                                                                                       | No                                             |
|                | One soup                          | Diet and exercise | No                              | MR-P; Nutrition Edu.; Help following programme end                                                                                                              | Dietitian                  | No                         | Individual           | Face to Face                      |                      | 12                           | 6                              | 24             | Weekly from 1 to 3 months, fortnightly 4 to 6 months, and monthly from 7 to 12 months                                           | 15 – 30                                                                                                                                       | No                                             |
|                | Two soups                         | Diet and exercise | No                              | MR-P; Nutrition Edu.; Help                                                                                                                                      | Dietitian                  | No                         | Individual           | Face to Face                      |                      | 12                           | 6                              | 24             | Weekly from 1 to 3 months, fortnightly                                                                                          | 15 - 30                                                                                                                                       | No                                             |



| Study ID   | Groups:                                                | Intervention type | Intervention faded in intensity | Features<br>(meal replacements, nutrition education, financial incentives, intermittent fasting, content designed to help participants following programme end) | Provider <sup>a</sup> | Provider training received | Delivery             |                     | Intervention setting         | Intervention timing (months) |                                | Sessions       |                                                                                                         |                                                                                  | Intervention personalized, titrated or adapted |
|------------|--------------------------------------------------------|-------------------|---------------------------------|-----------------------------------------------------------------------------------------------------------------------------------------------------------------|-----------------------|----------------------------|----------------------|---------------------|------------------------------|------------------------------|--------------------------------|----------------|---------------------------------------------------------------------------------------------------------|----------------------------------------------------------------------------------|------------------------------------------------|
|            |                                                        |                   |                                 |                                                                                                                                                                 |                       |                            | Mode                 | Format              |                              | Last contact                 | End (step change in intensity) | N <sup>c</sup> | Frequency                                                                                               | Length per session with description for varying lengths. (minutes <sup>b</sup> ) |                                                |
|            |                                                        |                   |                                 | following programme end                                                                                                                                         |                       |                            |                      |                     |                              |                              |                                |                | 4 to 6 months, and monthly from 7 to 12 months                                                          |                                                                                  |                                                |
| Rolls 2017 | Standard advice                                        | Diet and exercise | Yes                             | Nutrition Edu.                                                                                                                                                  | Dietitian; Other      | Yes                        | Individual           | Face to Face; Print | Community                    | 12                           | 1                              | 19             | Weekly in month 1 and biweekly in months 2–6, and 1-hour sessions were scheduled monthly in months 7–12 | Thirty-min weekly and biweekly sessions; 1-hour monthly sessions.                | Yes                                            |
|            | Pre-portioned foods group                              | Diet and exercise | Yes                             | MR-P; Nutrition Edu.; Help following programme end                                                                                                              | Dietitian; Other      | Yes                        | Individual           | Face to Face; Print | Community                    | 12                           | 1                              | 19             | Weekly in month 1 and biweekly in months 2–6, and 1-hour sessions were scheduled monthly in months 7–12 | Thirty-min weekly and biweekly sessions; 1-hour monthly sessions.                | Yes                                            |
|            | Portion selection group                                | Diet and exercise | Yes                             | Nutrition Edu.; Help following programme end                                                                                                                    | Dietitian; Other      | Yes                        | Individual           | Face to Face; Print | Community                    | 12                           | 1                              | 19             | Weekly in month 1 and biweekly in months 2–6, and 1-hour sessions were scheduled monthly in months 7–12 | Thirty-min weekly and biweekly sessions; 1-hour monthly sessions.                | Yes                                            |
| Rosas 2015 | Usual care                                             |                   | No                              |                                                                                                                                                                 | GP                    | No                         | Individual           | Face to Face        | Health Care                  |                              |                                |                |                                                                                                         |                                                                                  | No                                             |
|            | Case-management intervention                           |                   | Yes                             | Nutrition Edu.; Help following programme end                                                                                                                    | Health Trainer        | No                         | Individual and Group | Face to Face        | Health Care                  | 24                           | 6                              | 20             | 16 sessions from 0-12 months. 4 sessions from 12-24 months.                                             | Group sessions last 2 hours, individual sessions last 30 minutes.                | Yes                                            |
|            | Case-management + Community health worker intervention |                   | Yes                             | Nutrition Edu.; Help following programme end                                                                                                                    | Health Trainer        | No                         | Individual and Group | Face to Face        | Health Care; Community; Home | 24                           | 6                              | 27             | Same as CM group, with additional 5 home visits from 0-12 months and 2 home visits from 12-24 months.   | Same as CM group. The length of the additional CHW home visits is not clear.     | Yes                                            |
| Ross 2012  | Control condition                                      | Control           | No                              | Nutrition Edu.                                                                                                                                                  | Physician             | No                         | Unclear              | Face to Face        | Health Care                  |                              |                                |                | Usual schedule (typically once a year).                                                                 |                                                                                  | Yes                                            |

| Study ID      | Groups:                                  | Intervention type | Intervention faded in intensity | Features<br>(meal replacements, nutrition education, financial incentives, intermittent fasting, content designed to help participants following programme end) | Provider <sup>a</sup>                                               | Provider training received | Delivery             |                            | Intervention setting | Intervention timing (months) |                                | Sessions       |                                                                                                                                                                                                                  |                                                                                                                  | Intervention personalized, titrated or adapted |
|---------------|------------------------------------------|-------------------|---------------------------------|-----------------------------------------------------------------------------------------------------------------------------------------------------------------|---------------------------------------------------------------------|----------------------------|----------------------|----------------------------|----------------------|------------------------------|--------------------------------|----------------|------------------------------------------------------------------------------------------------------------------------------------------------------------------------------------------------------------------|------------------------------------------------------------------------------------------------------------------|------------------------------------------------|
|               |                                          |                   |                                 |                                                                                                                                                                 |                                                                     |                            | Mode                 | Format                     |                      | Last contact                 | End (step change in intensity) | N <sup>c</sup> | Frequency                                                                                                                                                                                                        | Length per session with description for varying lengths. (minutes <sup>b</sup> )                                 |                                                |
|               | Behavioral intervention group            | Diet and exercise | No                              | Nutrition Edu.; Help following programme end                                                                                                                    | Health Trainer                                                      | Yes                        | Individual and Group | Face to Face               |                      | 24                           | 6                              | 33             | First 6m: 8 sessions in first 6 weeks, then every 2 weeks. Months 7-24, monthly sessions.                                                                                                                        | (0-6 months, 15 sessions, 15 hours); Months 7-12 (6 sessions, 3-6 hours); Months 13-24 (12 sessions, 6-12 hours) | Yes                                            |
| Samaras 1997  | Control                                  | Control           | No                              |                                                                                                                                                                 |                                                                     |                            |                      |                            |                      |                              |                                |                |                                                                                                                                                                                                                  |                                                                                                                  |                                                |
|               | Intervention                             | Exercise only     | No                              | Help following programme end                                                                                                                                    | Nurse (General); Physician; Dietitian; Exercise physiologist; Other | Yes                        | Group                | Face to Face; Print; Video | Community            | 6                            | 6                              | 6              | Monthly                                                                                                                                                                                                          | 1 hour                                                                                                           | Yes                                            |
| Santasto 2011 | Physical Activity plus Successful Ageing | Diet only         | Yes                             | Nutrition Edu.; Help following programme end                                                                                                                    |                                                                     | Unclear                    | Individual and Group | Face to Face               | Community; Home      | 12                           | 6                              | 68.            | Monthly SA session; Exercise sessions: 3 x sessions/week (Weeks 1-8); two sessions/week (weeks 9-24); optional exercise session at the center once per week (weeks 25-52)                                        | 60 min exercise sessions                                                                                         | No                                             |
|               | Physical Activity plus Weight Loss       | Diet and exercise | Yes                             | Nutrition Edu.; Help following programme end                                                                                                                    | Nutritionist                                                        | Unclear                    | Individual and Group | Face to Face               | Community; Home      | 12                           | 6                              | 87             | Nutrition sessions: 24 weekly, 2 bimonthly, and 5 monthly; Exercise sessions: 3 x sessions/week (Weeks 1-8); two sessions/week (weeks 9-24); optional exercise session at the center once per week (weeks 25-52) | 60 minutes exercise sessions                                                                                     | No                                             |

| Study ID     | Groups:                        | Intervention type | Intervention faded in intensity | Features<br>(meal replacements, nutrition education, financial incentives, intermittent fasting, content designed to help participants following programme end) | Provider <sup>a</sup>                    | Provider training received | Delivery   |                                | Intervention setting | Intervention timing (months) |                                | Sessions       |                                                                                                          |                                                                                                                                                                                                                                                                                      | Intervention personalized, titrated or adapted |
|--------------|--------------------------------|-------------------|---------------------------------|-----------------------------------------------------------------------------------------------------------------------------------------------------------------|------------------------------------------|----------------------------|------------|--------------------------------|----------------------|------------------------------|--------------------------------|----------------|----------------------------------------------------------------------------------------------------------|--------------------------------------------------------------------------------------------------------------------------------------------------------------------------------------------------------------------------------------------------------------------------------------|------------------------------------------------|
|              |                                |                   |                                 |                                                                                                                                                                 |                                          |                            | Mode       | Format                         |                      | Last contact                 | End (step change in intensity) | N <sup>c</sup> | Frequency                                                                                                | Length per session with description for varying lengths. (minutes <sup>b</sup> )                                                                                                                                                                                                     |                                                |
| Sattin 2016  | Health Education intervention  | Control           | No                              | Nutrition Edu.                                                                                                                                                  | Health care professional (not specified) | Yes                        | Group      | Face to Face                   | Community            | 9                            | 3                              | 18             | Weekly for the first 12 weeks and monthly for the remaining 6m                                           |                                                                                                                                                                                                                                                                                      | Yes                                            |
|              | Fit body and soul intervention | Diet and exercise | No                              | Nutrition Edu.; Help following programme end                                                                                                                    | Health care professional (not specified) | Yes                        | Group      | Face to Face                   | Community            | 9                            | 3                              | 18             | Weekly for the first 12 weeks and monthly for the remaining 6m                                           |                                                                                                                                                                                                                                                                                      | Yes                                            |
| Schube 12016 | Control group                  | Control           | Yes                             | Nutrition Edu.                                                                                                                                                  | Dietitian; Nutritionist                  | Yes                        | Individual | Face to Face; Telephone        | Community            | 11.5                         | 3                              | 8              | Biweekly phone calls (Week 1-12); Two single sessions at the beginning and end of the Intervention phase | "The number of personal contacts and counseling sessions was the same for all study participants overall, but individuals in the ICR and CCR arms received longer and more comprehensive counseling sessions with personalized dietary plans, specific for the ICR or CCR regimens." | No                                             |
|              | Continuous Calorie Restriction | Diet only         | Yes                             | Nutrition Edu.; Help following programme end                                                                                                                    | Dietitian; Nutritionist                  | Yes                        | Individual | Face to Face; Telephone; Print | Community            | 11.5                         | 3                              | 8              | Biweekly phone calls (Week 1-12); Two single sessions at the beginning and end of the Intervention phase | "The number of personal contacts and counseling sessions was the same for all study participants overall, but individuals in the ICR and CCR arms received longer and more comprehensive                                                                                             | Yes                                            |

| Study ID      | Groups:                          | Intervention type | Intervention faded in intensity | Features<br>(meal replacements, nutrition education, financial incentives, intermittent fasting, content designed to help participants following programme end) | Provider <sup>a</sup>   | Provider training received | Delivery   |                                          | Intervention setting | Intervention timing (months) |                                | Sessions       |                                                                                                             |                                                                                                                                                                                                                                                                                      | Intervention personalized, titrated or adapted |
|---------------|----------------------------------|-------------------|---------------------------------|-----------------------------------------------------------------------------------------------------------------------------------------------------------------|-------------------------|----------------------------|------------|------------------------------------------|----------------------|------------------------------|--------------------------------|----------------|-------------------------------------------------------------------------------------------------------------|--------------------------------------------------------------------------------------------------------------------------------------------------------------------------------------------------------------------------------------------------------------------------------------|------------------------------------------------|
|               |                                  |                   |                                 |                                                                                                                                                                 |                         |                            | Mode       | Format                                   |                      | Last contact                 | End (step change in intensity) | N <sup>c</sup> | Frequency                                                                                                   | Length per session with description for varying lengths. (minutes <sup>b</sup> )                                                                                                                                                                                                     |                                                |
|               |                                  |                   |                                 |                                                                                                                                                                 |                         |                            |            |                                          |                      |                              |                                |                |                                                                                                             | counseling sessions with personalized dietary plans, specific for the ICR or CCR regimens."                                                                                                                                                                                          |                                                |
|               | Intermittent Calorie Restriction | Diet only         | Yes                             | Nutrition Edu.; Inter. Fasting; Help following programme end                                                                                                    | Dietitian; Nutritionist | Yes                        | Individual | Face to Face; Telephone; Print           | Community            | 11.5                         | 3                              | 8              | Biweekly phone calls (Week 1-12); Two single sessions at the beginning and end of the Intervention phase    | "The number of personal contacts and counseling sessions was the same for all study participants overall, but individuals in the ICR and CCR arms received longer and more comprehensive counseling sessions with personalized dietary plans, specific for the ICR or CCR regimens." | Yes                                            |
| Seligman 2011 | Standard-of-care strategy        | Diet only         |                                 | Nutrition Edu.                                                                                                                                                  |                         | Unclear                    | Individual | Print                                    |                      | 3                            | 3                              |                |                                                                                                             |                                                                                                                                                                                                                                                                                      | Yes                                            |
|               | Healthy diet and step counter    | Diet and exercise |                                 | Nutrition Edu.                                                                                                                                                  |                         | Unclear                    | Individual | Face to Face; Print                      |                      | 3                            | 3                              | 2              |                                                                                                             |                                                                                                                                                                                                                                                                                      | No                                             |
|               | Healthy diet and fitness         | Diet and exercise |                                 | Nutrition Edu.                                                                                                                                                  |                         | Unclear                    | Individual | Face to Face; Print                      |                      | 3                            | 3                              | 2              |                                                                                                             |                                                                                                                                                                                                                                                                                      | Yes                                            |
| Shikany 2013  | Food-based diet                  | Diet only         | Yes                             | Nutrition Edu.                                                                                                                                                  |                         | No                         | Individual | Face to Face; Telephone; Internet; Print | Health Care; Home    | 12                           | 6                              | 10             | Fortnightly until week 4, monthly until week 20, then six weeks, followed by one fortnight, followed by one |                                                                                                                                                                                                                                                                                      | Yes                                            |

| Study ID    | Groups:          | Intervention type | Intervention faded in intensity | Features<br>(meal replacements, nutrition education, financial incentives, intermittent fasting, content designed to help participants following programme end) | Provider <sup>a</sup>                                                    | Provider training received | Delivery             |                                   | Intervention setting | Intervention timing (months) |                                | Sessions       |                                                                                                                                                                                        |                                                                                  | Intervention personalised, titrated or adapted |
|-------------|------------------|-------------------|---------------------------------|-----------------------------------------------------------------------------------------------------------------------------------------------------------------|--------------------------------------------------------------------------|----------------------------|----------------------|-----------------------------------|----------------------|------------------------------|--------------------------------|----------------|----------------------------------------------------------------------------------------------------------------------------------------------------------------------------------------|----------------------------------------------------------------------------------|------------------------------------------------|
|             |                  |                   |                                 |                                                                                                                                                                 |                                                                          |                            | Mode                 | Format                            |                      | Last contact                 | End (step change in intensity) | N <sup>c</sup> | Frequency                                                                                                                                                                              | Length per session with description for varying lengths. (minutes <sup>b</sup> ) |                                                |
|             |                  |                   |                                 |                                                                                                                                                                 |                                                                          |                            |                      |                                   |                      |                              |                                |                | month to week 32, two months to week 40 and then six weekly until week 52.                                                                                                             |                                                                                  |                                                |
|             | Meal replacement | Diet only         | Yes                             | MR-P; Nutrition Edu.                                                                                                                                            | Dietitian; Health Trainer                                                | No                         | Individual           | Face to Face; Telephone; Internet | Health Care; Home    | 12                           | 6                              | 10             | Fortnightly until week 4, monthly until week 20, then six weeks, followed by one fortnight, followed by one month to week 32, two months to week 40 and then six weekly until week 52. |                                                                                  | Yes                                            |
| Sikand 1988 | No exercisers    | Diet only         | No                              | MR-F; Nutrition Edu.                                                                                                                                            |                                                                          | Unclear                    | Individual and Group | Face to Face                      | Health Care          | 4                            | 4                              | 16             | Weekly VLCD program                                                                                                                                                                    |                                                                                  | No                                             |
|             | Exercisers       | Diet and exercise | No                              | MR-F; Nutrition Edu.                                                                                                                                            |                                                                          | Unclear                    | Individual and Group | Face to Face                      | Health Care          | 4                            | 4                              | 32             | Exercise program: 2 x per week; VLCD program: weekly                                                                                                                                   |                                                                                  | No                                             |
| Silva 2010  | Comparison group |                   | No                              | Nutrition Edu.                                                                                                                                                  | Psychologist/ Counsellor; Dietitian; Nutritionist; Exercise physiologist | Unclear                    | Group                | Face to Face                      | Community            | 12                           | 12                             | 29             |                                                                                                                                                                                        |                                                                                  |                                                |
|             | Intervention     | Diet and exercise | Yes                             | Nutrition Edu.; Help following programme end                                                                                                                    | Psychologist/ Counsellor; Dietitian; Nutritionist; Exercise physiologist | Unclear                    | Group                | Face to Face; Print               | Community            | 12                           | 12                             | 30             | Weekly or twice a month                                                                                                                                                                | 120                                                                              |                                                |
| Snel 2012   | VLCD only        | Diet only         | No                              | MR-F; Nutrition Edu.                                                                                                                                            |                                                                          | Unclear                    | Unclear              | Face to Face                      | Health Care          | 4                            | 4                              |                |                                                                                                                                                                                        |                                                                                  | No                                             |
|             | VLCD + exercise  | Diet and exercise | No                              | MR-F; Nutrition Edu.                                                                                                                                            | Physiotherapist                                                          | Unclear                    | Unclear              | Face to Face                      | Health Care; Home    | 4                            | 4                              | 16             | Weekly at minimum                                                                                                                                                                      | One-hour supervised                                                              | No                                             |

| Study ID     | Groups:                                                                           | Intervention type | Intervention faded in intensity | Features<br>(meal replacements, nutrition education, financial incentives, intermittent fasting, content designed to help participants following programme end) | Provider <sup>a</sup>                                      | Provider training received | Delivery             |                                  | Intervention setting | Intervention timing (months) |                                | Sessions       |                                                                                                       |                                                                                             | Intervention personalized, titrated or adapted |
|--------------|-----------------------------------------------------------------------------------|-------------------|---------------------------------|-----------------------------------------------------------------------------------------------------------------------------------------------------------------|------------------------------------------------------------|----------------------------|----------------------|----------------------------------|----------------------|------------------------------|--------------------------------|----------------|-------------------------------------------------------------------------------------------------------|---------------------------------------------------------------------------------------------|------------------------------------------------|
|              |                                                                                   |                   |                                 |                                                                                                                                                                 |                                                            |                            | Mode                 | Format                           |                      | Last contact                 | End (step change in intensity) | N <sup>c</sup> | Frequency                                                                                             | Length per session with description for varying lengths. (minutes <sup>b</sup> )            |                                                |
|              |                                                                                   |                   |                                 |                                                                                                                                                                 |                                                            |                            |                      |                                  |                      |                              |                                |                |                                                                                                       | exercise sessions plus at least 4 home training sessions                                    |                                                |
| Solbrig 2019 | Motivational interviewing                                                         | Diet and exercise | Yes                             |                                                                                                                                                                 | Psychologist/ Counsellor                                   | No                         | Individual           | Face to Face; Telephone; Print   | Community            | 6                            | 6                              | 13             | 2 sessions after baseline assessment and fortnightly calls up to 6 months                             | Session 1: 1 hour<br>Session 2: 35min<br>phone calls: 5–15 min                              | Yes                                            |
|              | Functional imagery training                                                       | Diet and exercise | Yes                             |                                                                                                                                                                 | Psychologist/ Counsellor                                   | No                         | Individual           | Face to Face; Telephone; App     | Community            | 6                            | 6                              | 13             | 2 sessions after baseline assessment and fortnightly calls up to 6 months                             | Session 1: 1 hour<br>Session 2: 35min<br>phone calls: 5–15 min                              | Yes                                            |
| Somers 2012  | Standard Care                                                                     | Control           | No                              |                                                                                                                                                                 |                                                            | No                         | Unclear              | Unclear                          | Health Care          |                              |                                |                |                                                                                                       |                                                                                             |                                                |
|              | Lifestyle behavioral weight management intervention only                          | Diet and exercise | Yes                             | Nutrition Edu.; Help following programme end                                                                                                                    | Psychologist/ Counsellor; Exercise physiologist            | Yes                        | Group                | Face to Face; Telephone; Unclear | Community            | 12                           | 6                              | 21             | Group sessions (12 weekly, 12 biweekly); 3 exercise sessions in 12 weeks; 6 monthly maintenance calls | Group sessions (60 minutes); Exercise sessions (90 minutes); Maintenance calls (20 minutes) | Yes                                            |
|              | Lifestyle behavioral weight management intervention + Pain Coping Skills Training | Diet and exercise | Yes                             | Nutrition Edu.; Help following programme end                                                                                                                    | Psychologist/ Counsellor; Exercise physiologist            | Yes                        | Group                | Face to Face; Telephone; Unclear | Community            | 12                           | 6                              | 21             | Group sessions (12 weekly, 12 biweekly); 3 exercise sessions in 12 weeks; 6 monthly maintenance calls | Group sessions (120 mins); Exercise sessions (90 mins); Maintenance calls (20 mins)         | Yes                                            |
|              | Pain Coping Skills Training only (N/A)                                            | N/A               | N/A                             | N/A                                                                                                                                                             | N/A                                                        | N/A                        | N/A                  | N/A                              | N/A                  | N/A                          | N/A                            | N/A            | N/A                                                                                                   | N/A                                                                                         | N/A                                            |
| Spring 2013  | MOVE standard care                                                                | Diet and exercise | Yes                             | Nutrition Edu.                                                                                                                                                  | Physician; Psychologist/ Counsellor; Dietitian; Other AHPs | Unclear                    | Group                | Face to Face                     | Community            | 12                           | 6                              | 19             | Biweekly                                                                                              | 1.5 hours                                                                                   | Yes                                            |
|              | MOVE + personal                                                                   | Diet and exercise | Yes                             | Nutrition Edu.                                                                                                                                                  | Physician; Psychologist/                                   | Unclear                    | Individual and Group | Face to Face;                    | Community; Home      | 12                           | 6                              | 32             | Biweekly                                                                                              | 1.5 hours                                                                                   | Yes                                            |

| Study ID     | Groups:                                 | Intervention type | Intervention faded in intensity | Features<br>(meal replacements, nutrition education, financial incentives, intermittent fasting, content designed to help participants following programme end) | Provider <sup>a</sup>                              | Provider training received | Delivery             |                                                    | Intervention setting | Intervention timing (months) |                                | Sessions       |                                                                          |                                                                                          | Intervention personalized, titrated or adapted |
|--------------|-----------------------------------------|-------------------|---------------------------------|-----------------------------------------------------------------------------------------------------------------------------------------------------------------|----------------------------------------------------|----------------------------|----------------------|----------------------------------------------------|----------------------|------------------------------|--------------------------------|----------------|--------------------------------------------------------------------------|------------------------------------------------------------------------------------------|------------------------------------------------|
|              |                                         |                   |                                 |                                                                                                                                                                 |                                                    |                            | Mode                 | Format                                             |                      | Last contact                 | End (step change in intensity) | N <sup>c</sup> | Frequency                                                                | Length per session with description for varying lengths. (minutes <sup>b</sup> )         |                                                |
|              | digital assistant                       |                   |                                 |                                                                                                                                                                 | Counsellor; Dietitian                              |                            |                      | Telephone; Other                                   |                      |                              |                                |                |                                                                          |                                                                                          |                                                |
| Spring 2017  | Control self-guided program             | Diet and exercise | Yes                             | Nutrition Edu.; Fin. Incentives;                                                                                                                                |                                                    | Unclear                    | Group                | Face to Face; Print; Video                         | Community; Home      | 6                            | 6                              | 1              | Single session                                                           | 60                                                                                       | No                                             |
|              | Standard weight loss program            | Diet and exercise | Yes                             | Nutrition Edu.; Fin. Incentives                                                                                                                                 | Psychologist/ Counsellor; Exercise physiologist    | Unclear                    | Individual and Group | Face to Face; Telephone; Print                     | Community            | 6                            | 6                              | 19             | Weekly group sessions and calls (Months 1-2); Monthly calls (Months 3-6) | Group session (90 mins); Guided walking exercise (30 mins); Telephone calls (10-15 mins) | Yes                                            |
|              | Technology-supported                    | Diet and exercise | Yes                             | Nutrition Edu.; Fin. Incentives                                                                                                                                 | Psychologist/ Counsellor; Exercise physiologist    | Unclear                    | Individual and Group | Face to Face; Telephone; Internet; App; Print; SMS | Community; Home      | 6                            | 6                              | 19             | Weekly group sessions and calls (Months 1-2); Monthly calls (Months 3-6) | Group session (90 mins); Guided walking exercise (30 mins); Telephone calls (10-15 mins) | Yes                                            |
| Stahre 2005  | Control                                 | Control           | No                              |                                                                                                                                                                 |                                                    |                            |                      |                                                    |                      |                              |                                |                |                                                                          |                                                                                          |                                                |
|              | Cognitive treatment                     | Diet only         | No                              | Nutrition Edu.                                                                                                                                                  |                                                    |                            | Group                | Face to Face                                       | Health Care          | 2.3                          | 6                              | 10             | Weekly                                                                   | 3 hours                                                                                  | Yes                                            |
| Stahre 2007  | Control Group (weight-reducing program) | Diet and exercise | No                              | Nutrition Edu.                                                                                                                                                  | Nurse (General); Physician; Physiotherapist; Other | No                         | Group                | Face to Face                                       | Community            | 2.3                          | 2.3                            | 10             | Weekly                                                                   | 2 hours                                                                                  | No                                             |
|              | Cognitive treatment group               | Diet only         | No                              | Nutrition Edu.                                                                                                                                                  | Other AHPs                                         | Unclear                    | Group                | Face to Face                                       | Community            | 2.3                          | 2.3                            | 10             | Weekly                                                                   | 2 hours                                                                                  | No                                             |
| Stalons 1978 | Basic weight loss program               | Diet only         | No                              | Nutrition Edu.                                                                                                                                                  | Other                                              | Unclear                    | Individual and Group | Face to Face                                       | Community            | 2.3                          | 2.3                            | 10             | Weekly                                                                   | 1 hour                                                                                   | Yes                                            |
|              | WL program plus contingency component   | Diet only         | No                              | Nutrition Edu.                                                                                                                                                  | Other                                              | Unclear                    | Individual and Group | Face to Face                                       | Community            | 2.3                          | 2.3                            | 10             | Weekly                                                                   | 1 hour                                                                                   | Yes                                            |
|              | WL program plus exercise and            | Diet and exercise | No                              | Nutrition Edu.                                                                                                                                                  | Other                                              | Unclear                    | Individual and Group | Face to Face; Print                                | Community            | 2.3                          | 2.3                            | 10             | Weekly                                                                   | 1 hour                                                                                   | Yes                                            |

| Study ID               | Groups:                            | Intervention type | Intervention faded in intensity | Features<br>(meal replacements, nutrition education, financial incentives, intermittent fasting, content designed to help participants following programme end) | Provider <sup>a</sup>                                      | Provider training received | Delivery             |                                          | Intervention setting | Intervention timing (months) |                                | Sessions       |                                            |                                                                                                                                                                                                                                                                                                                                                                                                                                                    | Intervention personalized, titrated or adapted |
|------------------------|------------------------------------|-------------------|---------------------------------|-----------------------------------------------------------------------------------------------------------------------------------------------------------------|------------------------------------------------------------|----------------------------|----------------------|------------------------------------------|----------------------|------------------------------|--------------------------------|----------------|--------------------------------------------|----------------------------------------------------------------------------------------------------------------------------------------------------------------------------------------------------------------------------------------------------------------------------------------------------------------------------------------------------------------------------------------------------------------------------------------------------|------------------------------------------------|
|                        |                                    |                   |                                 |                                                                                                                                                                 |                                                            |                            | Mode                 | Format                                   |                      | Last contact                 | End (step change in intensity) | N <sup>c</sup> | Frequency                                  | Length per session with description for varying lengths. (minutes <sup>b</sup> )                                                                                                                                                                                                                                                                                                                                                                   |                                                |
|                        | contingency components             |                   |                                 |                                                                                                                                                                 |                                                            |                            |                      |                                          |                      |                              |                                |                |                                            |                                                                                                                                                                                                                                                                                                                                                                                                                                                    |                                                |
|                        | WL program plus exercise component | Diet and exercise | No                              | Nutrition Edu.                                                                                                                                                  | Other                                                      | Unclear                    | Individual and Group | Face to Face; Print                      | Community            | 2.3                          | 2.3                            | 10             | Weekly                                     | 1 hour                                                                                                                                                                                                                                                                                                                                                                                                                                             | Yes                                            |
| Stenius - Aamiala 2000 | Control                            | Diet only         | No                              | Nutrition Edu.                                                                                                                                                  |                                                            | No                         | Group                | Face to Face                             | Health Care          | 3.2                          | 3.2                            | 12             | Weekly                                     | 30                                                                                                                                                                                                                                                                                                                                                                                                                                                 |                                                |
|                        | Treatment with VLCD                | Diet only         | No                              | MR-F; Nutrition Edu.                                                                                                                                            |                                                            | Yes                        | Group                | Face to Face                             | Health Care; Home    | 3.2                          | 3.2                            | 12             | Weekly sessions for 14 weeks, 8 weeks VLCD |                                                                                                                                                                                                                                                                                                                                                                                                                                                    |                                                |
| Stevens 1993           | Control                            | Control           | No                              |                                                                                                                                                                 |                                                            | No                         |                      |                                          |                      | 0                            | 0                              | 0              |                                            |                                                                                                                                                                                                                                                                                                                                                                                                                                                    | No                                             |
|                        | Intervention                       | Diet and exercise | Yes                             | Nutrition Edu.; Help following programme end                                                                                                                    | Psychologist/ Counsellor; Dietitian; Exercise physiologist | Unclear                    | Individual and Group | Face to Face; Telephone; Internet; Print | Community            | 18                           | 3                              | 54             |                                            | 90 minutes group, individual length not reported.<br><br>The intervention started with an individual counseling session, followed by 14 weekly group meetings led by dietitians or health educators. After this 14-week intensive phase, participants attended six biweekly group meetings and then monthly group meetings. Beginning in the 18th month, participants were offered a variety of options to keep them involved in the intervention, | Yes                                            |



| Study ID     | Groups:                            | Intervention type | Intervention faded in intensity | Features<br>(meal replacements, nutrition education, financial incentives, intermittent fasting, content designed to help participants following programme end) | Provider <sup>a</sup>     | Provider training received | Delivery             |                                       | Intervention setting | Intervention timing (months) |                                | Sessions       |                                                                                                                                                                                                                                                                                                                                                     |                                                                                                              | Intervention personalized, titrated or adapted |
|--------------|------------------------------------|-------------------|---------------------------------|-----------------------------------------------------------------------------------------------------------------------------------------------------------------|---------------------------|----------------------------|----------------------|---------------------------------------|----------------------|------------------------------|--------------------------------|----------------|-----------------------------------------------------------------------------------------------------------------------------------------------------------------------------------------------------------------------------------------------------------------------------------------------------------------------------------------------------|--------------------------------------------------------------------------------------------------------------|------------------------------------------------|
|              |                                    |                   |                                 |                                                                                                                                                                 |                           |                            | Mode                 | Format                                |                      | Last contact                 | End (step change in intensity) | N <sup>c</sup> | Frequency                                                                                                                                                                                                                                                                                                                                           | Length per session with description for varying lengths. (minutes <sup>b</sup> )                             |                                                |
|              |                                    |                   |                                 |                                                                                                                                                                 |                           |                            |                      |                                       |                      |                              |                                |                |                                                                                                                                                                                                                                                                                                                                                     | including individual counseling sessions and special group sessions focused on selected weight loss topics.' |                                                |
| Stevens 2001 | Control                            | Control           | No                              |                                                                                                                                                                 |                           | Unclear                    |                      |                                       |                      |                              |                                | 0              |                                                                                                                                                                                                                                                                                                                                                     |                                                                                                              |                                                |
|              | Intervention                       | Diet and exercise | Yes                             | Nutrition Edu.; Help following programme end                                                                                                                    | Dietitian; Health Trainer | Unclear                    | Individual and Group | Face to Face; Telephone; Print; Other | Community            | 36                           | 6                              | 51             | Intensive phase (0-6 Months): 1 individual, 14 weekly, 6 biweekly sessions. Extended phase (7-36 Months): biweekly contacts with monthly face-to-face meetings until the intensive intervention is completed for the first cohort then mini-modules to be offered with continued biweekly contact. Specifically tailored follow-up where indicated. | 90 mins in first phase                                                                                       | Yes                                            |
|              | Sodium only intervention (N/A)     | N/A               | N/A                             | N/A                                                                                                                                                             | N/A                       | N/A                        | N/A                  | N/A                                   | N/A                  | N/A                          | N/A                            | N/A            | N/A                                                                                                                                                                                                                                                                                                                                                 | N/A                                                                                                          | N/A                                            |
|              | Combined intervention (N/A)        | N/A               | N/A                             | N/A                                                                                                                                                             | N/A                       | N/A                        | N/A                  | N/A                                   | N/A                  | N/A                          | N/A                            | N/A            | N/A                                                                                                                                                                                                                                                                                                                                                 | N/A                                                                                                          | N/A                                            |
| Stolley 2017 | Moving Forward Self-Guided program | Diet and exercise | No                              | Nutrition Edu.; Help following programme end                                                                                                                    | Other                     | No                         | Unclear              | Face to Face; Telephone; Print        | Community            | 12                           | 6                              | 6              | Single session plus monthly phone calls and monthly newsletters after 6m                                                                                                                                                                                                                                                                            |                                                                                                              | No                                             |

| Study ID     | Groups:                                       | Intervention type | Intervention faded in intensity | Features<br>(meal replacements, nutrition education, financial incentives, intermittent fasting, content designed to help participants following programme end) | Provider <sup>a</sup>                                               | Provider training received | Delivery             |                                          | Intervention setting         | Intervention timing (months) |                                | Sessions       |                                                                                                                                              |                                                                                                                                                                                                                         | Intervention personalized, titrated or adapted |
|--------------|-----------------------------------------------|-------------------|---------------------------------|-----------------------------------------------------------------------------------------------------------------------------------------------------------------|---------------------------------------------------------------------|----------------------------|----------------------|------------------------------------------|------------------------------|------------------------------|--------------------------------|----------------|----------------------------------------------------------------------------------------------------------------------------------------------|-------------------------------------------------------------------------------------------------------------------------------------------------------------------------------------------------------------------------|------------------------------------------------|
|              |                                               |                   |                                 |                                                                                                                                                                 |                                                                     |                            | Mode                 | Format                                   |                              | Last contact                 | End (step change in intensity) | N <sup>c</sup> | Frequency                                                                                                                                    | Length per session with description for varying lengths. (minutes <sup>b</sup> )                                                                                                                                        |                                                |
|              | Moving Forward Interventionist-Guided program | Diet and exercise | No                              | Nutrition Edu.; Help following programme end                                                                                                                    | Psychologist/ Counsellor; Dietitian; Nutritionist; Personal Trainer | Yes                        | Group                | Face to Face; Telephone; Print; SMS      | Community                    | 12                           | 6                              | 52             | Twice-weekly in-person classes; Twice-weekly text messaging; Monthly newsletters for 6m                                                      | Class 1 (90 mins) plus 45-60 mins exercise class; Weekly Class 2 (60 mins)                                                                                                                                              | Yes                                            |
| Strobl 2013  | Control, Usual care                           | Diet and exercise | No                              | Nutrition Edu.                                                                                                                                                  |                                                                     | Yes                        | Individual and Group | Face to Face                             | Inpatient                    | 0.7                          | 0.7                            | NR             |                                                                                                                                              | 3-week treatment (nutrition therapy, physical exercise, and psychoeducation), number and length of sessions not stated.                                                                                                 | Yes                                            |
|              | Telephone aftercare                           | Diet and exercise | Yes                             | Nutrition Edu.                                                                                                                                                  | Personal Trainer                                                    | Yes                        | Individual and Group | Face to Face; Telephone                  | Inpatient; Health Care; Home | 6                            | 0.7                            | NR + 8         |                                                                                                                                              | 3-week treatment (nutrition therapy, physical exercise, and psychoeducation), number and length of sessions not stated. PLUS 8 sessions [1 x 50 min group session; 1 x 10 min individual; 6 x 5-10 min telephone call]. | Yes                                            |
| Sundfor 2018 | Continuous energy restriction                 | Diet only         | Yes                             | Nutrition Edu.; Help following programme end                                                                                                                    | Dietitian                                                           | Unclear                    | Individual           | Face to Face; Telephone; Print; Internet | Health Care                  | 12                           | 6                              | 10             | "Follow-up visits were scheduled at biweekly intervals up to eight weeks, and thereafter monthly up to six months for a total of 10 visits." |                                                                                                                                                                                                                         | Yes                                            |
|              | Intermittent energy restriction               | Diet only         | Yes                             | Nutrition Edu.; Inter. Fasting; Help                                                                                                                            | Dietitian                                                           | Unclear                    | Individual           | Face to Face; Telephone;                 | Health Care                  | 12                           | 6                              | 10             | "Follow-up visits were scheduled at biweekly intervals                                                                                       |                                                                                                                                                                                                                         | Yes                                            |

| Study ID            | Groups:                                       | Intervention type | Intervention faded in intensity | Features<br>(meal replacements, nutrition education, financial incentives, intermittent fasting, content designed to help participants following programme end) | Provider <sup>a</sup>     | Provider training received | Delivery   |                                | Intervention setting | Intervention timing (months) |                                | Sessions       |                                                                                        |                                                                                  | Intervention personalized, titrated or adapted |
|---------------------|-----------------------------------------------|-------------------|---------------------------------|-----------------------------------------------------------------------------------------------------------------------------------------------------------------|---------------------------|----------------------------|------------|--------------------------------|----------------------|------------------------------|--------------------------------|----------------|----------------------------------------------------------------------------------------|----------------------------------------------------------------------------------|------------------------------------------------|
|                     |                                               |                   |                                 |                                                                                                                                                                 |                           |                            | Mode       | Format                         |                      | Last contact                 | End (step change in intensity) | N <sup>c</sup> | Frequency                                                                              | Length per session with description for varying lengths. (minutes <sup>b</sup> ) |                                                |
|                     |                                               |                   |                                 | following programme end                                                                                                                                         |                           |                            |            | Print; Internet                |                      |                              |                                |                | up to eight weeks, and thereafter monthly up to six months for a total of 10 visits.   |                                                                                  |                                                |
| Tapsell 2017        | Usual care (Control)                          | Diet and exercise | Yes                             | Nutrition Edu.                                                                                                                                                  | Nurse (General)           | Unclear                    | Individual | Face to Face; Telephone; Print | Health Care          | 12                           | 3                              | 11             | Months 1-3: Monthly; Months 1 – 12: Quarterly; Phone calls: Quarterly                  | 30 mins clinics; 15 min phone calls                                              | Yes                                            |
|                     | Intervention Group                            | Diet and exercise | Yes                             | Nutrition Edu.                                                                                                                                                  | Dietitian; Health Trainer | Yes                        | Individual | Face to Face; Telephone; Print | Health Care          | 12                           | 3                              | 11             | Months 1-3: Monthly; Months 1 – 12: Quarterly; Phone calls: Quarterly                  | 1 hour clinics; 15 min phone calls                                               | Yes                                            |
|                     | Intervention plus food supplement group (N/A) | N/A               | N/A                             | N/A                                                                                                                                                             | N/A                       | N/A                        | N/A        | N/A                            | N/A                  | N/A                          | N/A                            | N/A            | N/A                                                                                    | N/A                                                                              | N/A                                            |
| TarragaMarco s 2017 | G3                                            | Diet and exercise | No                              | Nutrition Edu.                                                                                                                                                  |                           | Unclear                    | Group      | Face to Face                   | Health Care          |                              |                                | 1              |                                                                                        |                                                                                  | No                                             |
|                     | G2                                            | Diet and exercise | Yes                             | Nutrition Edu.                                                                                                                                                  |                           | Unclear                    | Group      | Face to Face; Internet; Other  | Health Care; Home    | 12                           | 3                              | 6              | After the initial visit, visits were scheduled after 15 days, 1m, 3m, 6m and one year. |                                                                                  | No                                             |
|                     | G1                                            | Diet and exercise | Yes                             | Nutrition Edu.; Help following programme end                                                                                                                    | Nurse (General)           | Unclear                    | Group      | Face to Face                   | Health Care          | 8                            | 3                              | 10             | Every two weeks from weeks, 1 to 12 and then monthly from weeks 13 to 32               | 1 hour                                                                           | No                                             |
| Teeriniemi 2018     | Control                                       | Control           | No                              | Nutrition Edu.                                                                                                                                                  |                           | No                         | Other      | Print                          | Health Care          |                              |                                | 0              |                                                                                        |                                                                                  | Yes                                            |
|                     | SHG Counselling                               | Diet and exercise | No                              | Nutrition Edu.                                                                                                                                                  | Nurse (General)           | Yes                        | Group      | Face to Face                   | Community            | 0.7                          | 0.7                            | 2              |                                                                                        | 90                                                                               | No                                             |
|                     | CBT Counselling                               | Diet and exercise | Yes                             | Nutrition Edu.                                                                                                                                                  | Nutritionist              | No                         | Group      | Face to Face                   | Community            | 4.1                          | 4.1                            | 8              | 7 sessions every second week, last                                                     | 90                                                                               | No                                             |

| Study ID                           | Groups:                          | Intervention type | Intervention faded in intensity | Features<br>(meal replacements, nutrition education, financial incentives, intermittent fasting, content designed to help participants following programme end) | Provider <sup>a</sup>                                            | Provider training received | Delivery             |                                                 | Intervention setting   | Intervention timing (months) |                                | Sessions       |                                                                                                                                          |                                                                                                                                                              | Intervention personalized, titrated or adapted |
|------------------------------------|----------------------------------|-------------------|---------------------------------|-----------------------------------------------------------------------------------------------------------------------------------------------------------------|------------------------------------------------------------------|----------------------------|----------------------|-------------------------------------------------|------------------------|------------------------------|--------------------------------|----------------|------------------------------------------------------------------------------------------------------------------------------------------|--------------------------------------------------------------------------------------------------------------------------------------------------------------|------------------------------------------------|
|                                    |                                  |                   |                                 |                                                                                                                                                                 |                                                                  |                            | Mode                 | Format                                          |                        | Last contact                 | End (step change in intensity) | N <sup>c</sup> | Frequency                                                                                                                                | Length per session with description for varying lengths. (minutes <sup>b</sup> )                                                                             |                                                |
|                                    |                                  |                   |                                 |                                                                                                                                                                 |                                                                  |                            |                      |                                                 |                        |                              |                                |                | session after 1 month                                                                                                                    |                                                                                                                                                              |                                                |
|                                    | Control plus HBCSS               | Diet and exercise | No                              | Nutrition Edu.; Help following programme end                                                                                                                    |                                                                  | No                         | Other                | Internet; Print                                 | Health Care; Community | 12                           | 12                             | 0              |                                                                                                                                          | 52-week access to Web-based HBCSS                                                                                                                            | Yes                                            |
|                                    | SHG Counselling plus HBCSS       | Diet and exercise | No                              | Nutrition Edu.; Help following programme end                                                                                                                    | Nurse (General)                                                  | Yes                        | Group                | Face to Face; Internet                          | Community              | 12                           | 12                             | 2              |                                                                                                                                          | 90 minutes 52-week access to Web-based HBCSS                                                                                                                 | Yes                                            |
|                                    | CBT Counselling plus HBCSS       | Diet and exercise | Yes                             | Nutrition Edu.; Help following programme end                                                                                                                    | Nutritionist                                                     | No                         | Group                | Face to Face; Internet                          | Community              | 12                           | 12                             | 8              | 7 sessions every second week, last session after 1 month                                                                                 | 90 minutes 52-week access to Web-based HBCSS                                                                                                                 | Yes                                            |
| ter Bogt 2009                      | GP usual care                    | Control           | No                              |                                                                                                                                                                 | GP                                                               | Unclear                    | Individual           | Face to Face                                    | Health Care            |                              |                                | 1              |                                                                                                                                          | 10                                                                                                                                                           | No                                             |
|                                    | Lifestyle counselling from NP    | Diet and exercise | Yes                             | Nutrition Edu.                                                                                                                                                  | Nurse (General)                                                  | Yes                        | Individual           | Face to Face; Telephone                         | Health Care            | 36                           | 8                              | 11             | Four visits (at months 1, 2, 3, 8); 1 telephone call (5 months) in the first year; one visit and one telephone call per year (year 2, 3) | Average duration of the visits was 35 minutes for the first and second visit (range 15–60 minutes) and 25 minutes for the third visit (range 15–40 minutes). | Yes                                            |
| The Look AHEAD Research Group 2010 | Diabetes support and education   | Diet and exercise | No                              | Nutrition Edu.; Help following programme end                                                                                                                    | Nurse (General); Dietitian; Health Trainer; Personal Trainer     | Yes                        | Group                | Face to Face; Telephone; Print; Other           | Community              |                              | 48                             | 22             | 3 sessions annually for the first 4 years of follow-up; thereafter, one session was provided annually                                    | 60 – 90                                                                                                                                                      | No                                             |
|                                    | Intensive lifestyle intervention | Diet and exercise | Yes                             | MR-P; Nutrition Edu.; Help following programme end                                                                                                              | Nurse (General); Physician; Psychologist/ Counsellor; Dietitian; | Yes                        | Individual and Group | Face to Face; Telephone; Internet; Print; Other | Community              | 115                          | 12                             | 134            | Months 1-6: weekly; Months 7-12: 3/month; Years 2-4: Minimum of 1/month;                                                                 | Months 1-6: Group sessions: 60 to 75 minutes; Individual sessions: 20 to 30 minutes.                                                                         | Yes                                            |

| Study ID          | Groups:                         | Intervention type | Intervention faded in intensity | Features<br>(meal replacements, nutrition education, financial incentives, intermittent fasting, content designed to help participants following programme end) | Provider <sup>a</sup>                                | Provider training received | Delivery                    |                                 | Intervention setting | Intervention timing (months) |                                | Sessions       |                                                                                      |                                                                                  | Intervention personalized, titrated or adapted |
|-------------------|---------------------------------|-------------------|---------------------------------|-----------------------------------------------------------------------------------------------------------------------------------------------------------------|------------------------------------------------------|----------------------------|-----------------------------|---------------------------------|----------------------|------------------------------|--------------------------------|----------------|--------------------------------------------------------------------------------------|----------------------------------------------------------------------------------|------------------------------------------------|
|                   |                                 |                   |                                 |                                                                                                                                                                 |                                                      |                            | Mode                        | Format                          |                      | Last contact                 | End (step change in intensity) | N <sup>c</sup> | Frequency                                                                            | Length per session with description for varying lengths. (minutes <sup>b</sup> ) |                                                |
|                   |                                 |                   |                                 |                                                                                                                                                                 | Personal Trainer                                     |                            |                             |                                 |                      |                              |                                |                | Year 5+: Monthly recommended.                                                        |                                                                                  |                                                |
| Trepanowski 2017  | No-intervention control group   | Control           | No                              |                                                                                                                                                                 |                                                      | Unclear                    |                             |                                 | Community            |                              |                                | 0              |                                                                                      |                                                                                  | No                                             |
|                   | Daily calorie restriction group | Diet only         | No                              | Nutrition Edu.; Help following programme end                                                                                                                    | Dietitian; Nutritionist                              | Unclear                    | Individual                  | Face to Face; Other             | Community            | 12                           | 6                              | 14             | Counselling: Months 4 – 6: weekly; Months 6 – 12: monthly                            |                                                                                  | Yes                                            |
|                   | Alternate-day fasting group     | Diet only         | No                              | Nutrition Edu.; Inter. Fasting; Help following programme end                                                                                                    | Dietitian; Nutritionist                              | Unclear                    | Individual                  | Face to Face; Other             | Community            | 12                           | 6                              | 14             | Counselling: Months 4 – 6: weekly; Months 6 – 12: monthly                            |                                                                                  | Yes                                            |
| Tsai 2010         | Control                         | Control           | No                              | Nutrition Edu.                                                                                                                                                  | GP                                                   | No                         | Individual                  | Face to Face; Print             | Health Care          | 12                           | 12                             | 4              | Quarterly                                                                            | 2 – 3                                                                            | No                                             |
|                   | Brief counselling               | Diet and exercise | No                              | Nutrition Edu.                                                                                                                                                  | Other AHPs; Health care professional (not specified) | Yes                        | Individual                  | Face to Face; Telephone; Print  | Health Care          | 12                           | 6                              | 12             | PCP visits: quarterly. MA visits: weeks 0, 2, 4, 8, 12, 16, 20, 24                   | 15 – 20                                                                          | Yes                                            |
| Tuomilehto 2009   | Control                         | Diet and exercise | No                              | Nutrition Edu.                                                                                                                                                  | Nurse (General); Physician                           | Yes                        | Individual                  |                                 |                      | 12                           |                                | 3              | At baseline, 3ms and 12m                                                             |                                                                                  | No                                             |
|                   | Intervention                    | Diet and exercise | Yes                             | MR-F; Nutrition Edu.                                                                                                                                            | Nutritionist; Physiotherapist                        | Unclear                    | Individual and Group        | Face to Face                    | Health Care; Home    | 12                           | 3                              | 14             | Every 2 weeks until week 12 then monthly                                             | 60 – 90                                                                          | Yes                                            |
| van de Glind 2017 | Comparison group                | Control           | No                              | Nutrition Edu.                                                                                                                                                  |                                                      | No                         |                             | Print                           | Community            |                              |                                |                |                                                                                      |                                                                                  | No                                             |
|                   | EuroFIT group                   | Diet and exercise | No                              | Nutrition Edu.; Help following programme end                                                                                                                    | Health Trainer                                       | Yes                        | Group                       | Face to Face; App; Print; Other | Community            | 6 - 9                        | 3                              | 13             | Weekly for Weeks 1 to 12; One reunion meeting held 6–9 months after the program end. | 90                                                                               | Yes                                            |
| vanWier 2011      | Control – Brochure              | Control           | No                              | Nutrition Edu.                                                                                                                                                  |                                                      |                            | Other – information booklet |                                 |                      |                              |                                |                |                                                                                      |                                                                                  | No                                             |

| Study ID       | Groups:                                 | Intervention type | Intervention faded in intensity | Features<br>(meal replacements, nutrition education, financial incentives, intermittent fasting, content designed to help participants following programme end) | Provider <sup>a</sup>                    | Provider training received | Delivery             |              | Intervention setting         | Intervention timing (months) |                                | Sessions       |                                                                                                                                                                                  |                                                                                  | Intervention personalized, titrated or adapted |
|----------------|-----------------------------------------|-------------------|---------------------------------|-----------------------------------------------------------------------------------------------------------------------------------------------------------------|------------------------------------------|----------------------------|----------------------|--------------|------------------------------|------------------------------|--------------------------------|----------------|----------------------------------------------------------------------------------------------------------------------------------------------------------------------------------|----------------------------------------------------------------------------------|------------------------------------------------|
|                |                                         |                   |                                 |                                                                                                                                                                 |                                          |                            | Mode                 | Format       |                              | Last contact                 | End (step change in intensity) | N <sup>c</sup> | Frequency                                                                                                                                                                        | Length per session with description for varying lengths. (minutes <sup>b</sup> ) |                                                |
|                | Internet Group                          | Diet and exercise | No                              | Nutrition Edu.                                                                                                                                                  | Psychologist/ Counsellor; Health Trainer | Yes                        | Individual           | Internet     | Workplace; Home              | 6                            | 6                              | 10             | Every 2 weeks                                                                                                                                                                    | Work on module on internet. Email contact after completion of each module.       | No                                             |
|                | Phone Group                             | Diet and exercise | No                              | Nutrition Edu.                                                                                                                                                  | Psychologist/ Counsellor; Health Trainer | Yes                        | Individual           | Telephone    | Workplace; Home              | 6                            | 6                              | 10             | Every 2 weeks                                                                                                                                                                    | Call every 2 weeks. Work on modules individually in between calls.               | No                                             |
| Viegen er 1990 | Intermittent diet                       | Diet and exercise | No                              | Nutrition Edu.; Fin. Incentives; Help following programme end                                                                                                   | Psychologist/ Counsellor                 | No                         | Group                | Face to Face |                              | 12                           | 6                              | 26             | Weekly                                                                                                                                                                           | 2 hours                                                                          | No                                             |
|                | Standard treatment                      | Diet and exercise | No                              | Nutrition Edu.; Fin. Incentives; Inter. Fasting; Help following programme end                                                                                   | Psychologist/ Counsellor                 | No                         | Group                | Face to Face |                              | 12                           | 6                              | 26             | Weekly                                                                                                                                                                           | 2 hours                                                                          | No                                             |
| Vissers 2010   | Control                                 | Control           | No                              |                                                                                                                                                                 |                                          | No                         |                      |              |                              |                              |                                |                |                                                                                                                                                                                  |                                                                                  |                                                |
|                | Diet only group (Diet)                  | Diet only         | Yes                             | Nutrition Edu.                                                                                                                                                  | Dietitian                                | Unclear                    | Individual           | Face to Face | Community                    | 12                           | 3                              | 12             | During the first 3 months participants had a dietary counseling every fortnight. During the next 3 months there was a dietary counseling once a month. 3 more visits months 6-12 |                                                                                  | Yes                                            |
|                | Diet + fitness training group (Fitness) | Diet and exercise | Yes                             | Nutrition Edu.                                                                                                                                                  | Dietitian; Physiotherapist               | Unclear                    | Individual and Group | Face to Face | Health Care; Community; Home | 12                           | 3                              | 51             | As per diet only plus 2 x week for first 3m, 1 x week for second 3m                                                                                                              |                                                                                  | Yes                                            |
|                | Diet + WBV group (Vibration)            | Diet and exercise | Yes                             | Nutrition Edu.                                                                                                                                                  | Dietitian; Physiotherapist               | Unclear                    | Individual and Group | Face to Face | Community; Home              | 12                           | 3                              | 51             | As per diet only plus 2 x week for first 3m, 1 x week for second 3m                                                                                                              |                                                                                  | Yes                                            |

| Study ID           | Groups:                          | Intervention type | Intervention faded in intensity | Features<br>(meal replacements, nutrition education, financial incentives, intermittent fasting, content designed to help participants following programme end) | Provider <sup>a</sup>                                           | Provider training received | Delivery             |                                   | Intervention setting | Intervention timing (months) |                                | Sessions       |                                                                                                                             |                                                                                  | Intervention personalized, titrated or adapted |
|--------------------|----------------------------------|-------------------|---------------------------------|-----------------------------------------------------------------------------------------------------------------------------------------------------------------|-----------------------------------------------------------------|----------------------------|----------------------|-----------------------------------|----------------------|------------------------------|--------------------------------|----------------|-----------------------------------------------------------------------------------------------------------------------------|----------------------------------------------------------------------------------|------------------------------------------------|
|                    |                                  |                   |                                 |                                                                                                                                                                 |                                                                 |                            | Mode                 | Format                            |                      | Last contact                 | End (step change in intensity) | N <sup>c</sup> | Frequency                                                                                                                   | Length per session with description for varying lengths. (minutes <sup>b</sup> ) |                                                |
| Volpe 2008         | Exercise only                    | Exercise only     | Yes                             | Help following programme end                                                                                                                                    | Other                                                           | Yes                        | Group                | Face to Face; Telephone; Internet | Community; Home      | 12                           | 6                              | 96             | 3/4/5 days/week exercise sessions; Monthly and periodic phone/email contact                                                 | 30                                                                               |                                                |
|                    | Diet only                        | Diet only         | Yes                             | Nutrition Edu.; Help following programme end                                                                                                                    |                                                                 | Unclear                    | Group                | Face to Face; Telephone; Internet | Community            | 12                           | 6                              | 18             | Weekly; biweekly nutrition sessions; Monthly; periodically phone/email contact                                              |                                                                                  |                                                |
|                    | Combination of diet and exercise | Diet and exercise | Yes                             | Nutrition Edu.; Help following programme end                                                                                                                    | Other                                                           | Yes                        | Group                | Face to Face; Telephone; Internet | Community; Home      | 12                           | 6                              | 114            | 3/4/5 days/week exercise sessions; Weekly; biweekly nutrition sessions; Monthly; periodically phone/email contact           | 30 mins exercise sessions; duration of nutritional sessions not reported.        |                                                |
| von Gruenigen 2012 | Control                          | Control           | No                              | Nutrition Edu.;                                                                                                                                                 |                                                                 | Unclear                    | Individual           | Face to Face; Print               | Health Care          |                              |                                | 1              | Once                                                                                                                        |                                                                                  | No                                             |
|                    | Intervention                     | Diet and exercise | Yes                             | Nutrition Edu.                                                                                                                                                  | Physician; Psychologist/ Counsellor; Dietitian; Physiotherapist | Unclear                    | Individual and Group | Face to Face; Print; Internet     | Health Care          | 12                           | 6                              | 16             | Group sessions (10 weekly followed by 6 bi-weekly); Physician face-to-face counseling visits occurred at 3, 6 and 12 months | Group sessions were 60 min                                                       | Yes                                            |
| von Gruenigen 2008 | Control, Usual care              | Control           | No                              | Nutrition Edu.                                                                                                                                                  |                                                                 |                            | Unclear              | Print                             | Health Care          |                              |                                | 0              |                                                                                                                             |                                                                                  | No                                             |
|                    | Lifestyle intervention           | Diet and exercise | Yes                             | Nutrition Edu.; Help following programme end                                                                                                                    | Psychologist/ Counsellor; Dietitian; Other                      |                            | Individual and Group | Face to Face; Telephone; Print    | Health Care          | 6                            | 6                              | 24             | Weekly for 6 weeks, bi-weekly for 1 month, and monthly for 3 months.                                                        |                                                                                  | Yes                                            |
| Wadden 1986        | VLCD                             | Diet only         | No                              | Nutrition Edu.                                                                                                                                                  | Psychologist/ Counsellor                                        | No                         | Group                | Face to Face                      |                      | 16                           | 4                              | 20             | Weekly                                                                                                                      | 90                                                                               | No                                             |
|                    | Behaviour                        | Diet and exercise | Yes                             | Nutrition Edu.; Help following programme end                                                                                                                    | Psychologist/ Counsellor                                        | No                         | Group                | Face to Face                      |                      | 24                           | 6                              | 35             | Weekly                                                                                                                      | 90                                                                               | No                                             |

| Study ID    | Groups:                                 | Intervention type | Intervention faded in intensity | Features<br>(meal replacements, nutrition education, financial incentives, intermittent fasting, content designed to help participants following programme end) | Provider <sup>a</sup>              | Provider training received | Delivery |                     | Intervention setting | Intervention timing (months) |                                | Sessions       |                                                                                         |                                                                                  | Intervention personalised, titrated or adapted |
|-------------|-----------------------------------------|-------------------|---------------------------------|-----------------------------------------------------------------------------------------------------------------------------------------------------------------|------------------------------------|----------------------------|----------|---------------------|----------------------|------------------------------|--------------------------------|----------------|-----------------------------------------------------------------------------------------|----------------------------------------------------------------------------------|------------------------------------------------|
|             |                                         |                   |                                 |                                                                                                                                                                 |                                    |                            | Mode     | Format              |                      | Last contact                 | End (step change in intensity) | N <sup>c</sup> | Frequency                                                                               | Length per session with description for varying lengths. (minutes <sup>b</sup> ) |                                                |
|             | Combined                                | Diet and exercise | No                              | Nutrition Edu.; Help following programme end                                                                                                                    | Psychologist/Counsellor            | No                         | Group    | Face to Face        |                      | 24                           | 6                              | 35             | Weekly                                                                                  | 90                                                                               | No                                             |
| Wadden 1994 | Balanced deficit diet                   | Diet and exercise | Yes                             | Nutrition Edu.; Help following programme end                                                                                                                    | Psychologist/Counsellor; Dietitian | Yes                        | Group    | Face to Face        |                      | 18                           | 12                             | 65             | First 52 weeks: weekly. Weeks 53-78; fortnightly                                        | 1.5 hours                                                                        | Yes                                            |
|             | Very low-calorie diet                   | Diet and exercise | Yes                             | MR-P; MR-F; Nutrition Edu.; Help following programme end                                                                                                        | Psychologist/Counsellor; Dietitian | Yes                        | Group    | Face to Face        |                      | 18                           | 12                             | 65             | First 52 weeks: weekly. Weeks 53-78; fortnightly                                        | 1.5 hours                                                                        | Yes                                            |
| Wadden 1998 | Diet alone, Control                     | Diet only         | Yes                             | MR-P; Nutrition Edu.                                                                                                                                            | Psychologist/Counsellor            |                            | Group    | Face to Face; Print | Community; Home      | 11.1                         | 3.9                            | 38             | First 28 weeks: weekly. Then fortnightly for 20 weeks. Once every 3 months in 2nd year. | 1.5                                                                              | No                                             |
|             | Diet plus aerobic exercise              | Diet and exercise | Yes                             | MR-P; Nutrition Edu.                                                                                                                                            | Psychologist/Counsellor            | Yes                        | Group    | Face to Face; Print | Community; Home      | 11.1                         | 3.9                            | 160            | First 28 weeks: weekly. Then fortnightly for 20 weeks. Once every 3 months in 2nd year. | 1.5                                                                              | No                                             |
|             | Diet plus strength training             | Diet and exercise | Yes                             | MR-P; Nutrition Edu.                                                                                                                                            | Psychologist/Counsellor            | Yes                        | Group    | Face to Face; Print | Community; Home      | 11.1                         | 3.9                            | 160            | First 28 weeks: weekly. Then fortnightly for 20 weeks. Once every 3 months in 2nd year. | 1.5                                                                              | No                                             |
|             | Diet plus aerobic and strength training | Diet and exercise | Yes                             | MR-P; Nutrition Edu.                                                                                                                                            | Psychologist/Counsellor            | Yes                        | Group    | Face to Face; Print | Community; Home      | 11.1                         | 3.9                            | 160            | First 28 weeks: weekly. Then fortnightly for 20 weeks. Once every 3 months in 2nd year. | 1.5                                                                              | No                                             |
| Wadden 2004 | Nondietering approach                   | Diet and exercise | Yes                             | Nutrition Edu.                                                                                                                                                  | Psychologist/Counsellor; Dietitian | No                         | Group    | Face to Face        |                      | 14                           | 10                             | 31             | Weekly for 20 weeks, every other week for weeks 22-40, follow up sessions 52 and 65     | 90                                                                               | No                                             |
|             | Balanced-deficit diet                   | Diet and exercise | Yes                             | Nutrition Edu.; Help following programme end                                                                                                                    | Psychologist/Counsellor; Dietitian | No                         | Group    | Face to Face        |                      | 14                           | 10                             | 31             | Weekly for 20 weeks, every other week for weeks 22-                                     | 90                                                                               | No                                             |



| Study ID                | Groups:                     | Intervention type | Intervention faded in intensity | Features<br>(meal replacements, nutrition education, financial incentives, intermittent fasting, content designed to help participants following programme end) | Provider <sup>a</sup>                                                         | Provider training received | Delivery             |                  | Intervention setting | Intervention timing (months) |                                | Sessions           |                                                                                                                                                                        |                                                                                  | Intervention personalized, titrated or adapted |
|-------------------------|-----------------------------|-------------------|---------------------------------|-----------------------------------------------------------------------------------------------------------------------------------------------------------------|-------------------------------------------------------------------------------|----------------------------|----------------------|------------------|----------------------|------------------------------|--------------------------------|--------------------|------------------------------------------------------------------------------------------------------------------------------------------------------------------------|----------------------------------------------------------------------------------|------------------------------------------------|
|                         |                             |                   |                                 |                                                                                                                                                                 |                                                                               |                            | Mode                 | Format           |                      | Last contact                 | End (step change in intensity) | N <sup>c</sup>     | Frequency                                                                                                                                                              | Length per session with description for varying lengths. (minutes <sup>b</sup> ) |                                                |
|                         |                             |                   |                                 |                                                                                                                                                                 |                                                                               |                            |                      |                  |                      |                              |                                |                    | 40, follow up sessions 52 and 65                                                                                                                                       |                                                                                  |                                                |
|                         | Meal replacement plan       | Diet and exercise | Yes                             | MR-P; Nutrition Edu.; Help following programme end                                                                                                              | Psychologist/ Counsellor; Dietitian                                           | No                         | Group                | Face to Face     |                      | 14                           | 10                             | 31                 | Weekly for 20 weeks, every other week weeks 22-40, follow up sessions 52 and 65                                                                                        | 90                                                                               | No                                             |
| Waleek hachon loet 2007 | Individual behavior therapy | Diet only         | No                              | Nutrition Edu.                                                                                                                                                  | Health Trainer                                                                |                            | Individual           | Face to Face     | Community            | 3                            | 3                              | 5                  | One per two weeks                                                                                                                                                      | First session: 2h all the rest: 30 min.                                          | Yes                                            |
|                         | Group behavior therapy      | Diet only         | No                              | Nutrition Edu.                                                                                                                                                  | Health Trainer                                                                |                            | Group                | Face to Face     | Community            | 3                            | 3                              | 5                  | One per two weeks                                                                                                                                                      | First session: 2h all the rest: 60 min.                                          | Yes                                            |
| Weinstock 2013          | Conference Call DPP         | Diet and exercise | Yes                             | Nutrition Edu.                                                                                                                                                  | Nurse (General); Dietitian; Other                                             | Yes                        | Group                | Telephone; Print | Health Care          | 24                           | 24                             | 40 plus 6 optional | Educators: weekly-5 weeks, monthly-1 year; Coaches: Monthly (Year 1)                                                                                                   |                                                                                  | Yes                                            |
|                         | Individual Call DPP         | Diet and exercise | Yes                             | Nutrition Edu.                                                                                                                                                  | Nurse (General); Dietitian; Other                                             | Yes                        | Individual           | Telephone; Print | Health Care          | 24                           | 24                             | 40 + 6 optional    | Educators: weekly-5 weeks, monthly-1 year; Coaches: Monthly (Year 1)                                                                                                   |                                                                                  | Yes                                            |
| West 2007               | Attention control           | Diet and exercise | Yes                             | Nutrition Edu.; Help following programme end                                                                                                                    | Nutritionist; Exercise physiologist; Health Trainer                           | No                         | Group                | Face to Face     |                      | 18                           | 6                              | 47                 | Weekly for 6m, Biweekly for 6m, and then monthly for 6m.                                                                                                               | 45                                                                               | No                                             |
|                         | Motivational interviewing   | Diet and exercise | Yes                             | Nutrition Edu.; Help following programme end                                                                                                                    | Psychologist/ Counsellor; Nutritionist; Exercise physiologist; Health Trainer | No                         | Individual and Group | Face to Face     |                      | 18                           | 6                              | 47                 | Weekly for 6m, Biweekly for 6m, and then monthly for 6m. Five individual motivational interviewing sessions were offered, with the first session before starting group | 45                                                                               | Yes                                            |

| Study ID     | Groups:                                                                                     | Intervention type | Intervention faded in intensity | Features<br>(meal replacements, nutrition education, financial incentives, intermittent fasting, content designed to help participants following programme end) | Provider <sup>a</sup>                    | Provider training received | Delivery             |                                | Intervention setting | Intervention timing (months) |                                | Sessions       |                                                                                                                                        |                                                                                  | Intervention personalized, titrated or adapted |
|--------------|---------------------------------------------------------------------------------------------|-------------------|---------------------------------|-----------------------------------------------------------------------------------------------------------------------------------------------------------------|------------------------------------------|----------------------------|----------------------|--------------------------------|----------------------|------------------------------|--------------------------------|----------------|----------------------------------------------------------------------------------------------------------------------------------------|----------------------------------------------------------------------------------|------------------------------------------------|
|              |                                                                                             |                   |                                 |                                                                                                                                                                 |                                          |                            | Mode                 | Format                         |                      | Last contact                 | End (step change in intensity) | N <sup>c</sup> | Frequency                                                                                                                              | Length per session with description for varying lengths. (minutes <sup>b</sup> ) |                                                |
|              |                                                                                             |                   |                                 |                                                                                                                                                                 |                                          |                            |                      |                                |                      |                              |                                |                | therapy and then at 3, 6, 9, and 12m.                                                                                                  |                                                                                  |                                                |
| West 2011    | Control                                                                                     | Control           | No                              |                                                                                                                                                                 |                                          |                            |                      |                                |                      |                              |                                |                |                                                                                                                                        |                                                                                  | No                                             |
|              | Lifestyle Intervention                                                                      | Diet and exercise | No                              | Nutrition Edu.; Help following programme end                                                                                                                    | Health Trainer                           | Yes                        | Group                | Face to Face; Print            | Community            | 12                           | 4                              | 20             | Weekly for first 4m (12 weeks?), then monthly for 8m                                                                                   | 60                                                                               | Yes                                            |
| West 2016    | Internet behavioral weight control treatment                                                | Diet and exercise | Yes                             | Nutrition Edu.; Help following programme end                                                                                                                    | Psychologist/ Counsellor                 | No                         | Group                | Internet                       | Community            | 18                           | 6                              | 36             | Weekly for 6m; Monthly for 12m                                                                                                         | 1 hour                                                                           | Yes                                            |
|              | Internet behavioral weight control treatment + Motivational interviewing                    | Diet and exercise | Yes                             | Nutrition Edu.; Help following programme end                                                                                                                    | Psychologist/ Counsellor; Health Trainer | Yes                        | Individual and Group | Telephone; Internet            | Community            | 18                           | 6                              | 42             | Weekly for 6m; Monthly for 12m plus 1 MI session before first group session, 1 at session 5 the remaining 4 at 3m intervals.           | 1 hour 1 hour group sessions; 30 minutes MI sessions                             | Yes                                            |
| Whelton 1998 | Non-weight loss (Usual lifestyle, control group plus sodium reduction)                      | Control           | No                              |                                                                                                                                                                 |                                          | Unclear                    | Group                | Face to Face                   | Community            | 12                           | 12                             | 3              | Quarterly for 1 year                                                                                                                   |                                                                                  | No                                             |
|              | Weight loss (Weight loss alone plus weight loss and sodium reduction combined intervention) | Diet and exercise | Yes                             | Nutrition Edu.;                                                                                                                                                 | Nutritionist; Personal Trainer           | Unclear                    | Individual and Group | Face to Face; Telephone; Print | Community            | 30                           | 8                              | 46             | Weekly during the intensive phase (Months 0-4); Biweekly during the extended phase (Months 5-8); Monthly during the maintenance phase. |                                                                                  | Yes                                            |
| Wilson 2010  | Guided Self-help Based on CBT                                                               | Diet only         | Yes                             | Nutrition Edu.; Help following programme end                                                                                                                    | Psychologist/ Counsellor                 | Yes                        | Individual           | Face to Face; Print            | Health Care          | 5.5                          | 5.5                            | 10             | The first 4 sessions were weekly, the next 2 occurred at 2-week intervals, and the last 4 occurred at 4-week intervals.                | First session: 60 minutes; All following sessions: 25 minutes                    | Yes                                            |

| Study ID     | Groups:                                              | Intervention type | Intervention faded in intensity | Features (meal replacements, nutrition education, financial incentives, intermittent fasting, content designed to help participants following programme end) | Provider <sup>a</sup>                      | Provider training received | Delivery             |                     | Intervention setting | Intervention timing (months) |                                | Sessions       |                                                                               |                                                                                                                              | Intervention personalized, titrated or adapted |
|--------------|------------------------------------------------------|-------------------|---------------------------------|--------------------------------------------------------------------------------------------------------------------------------------------------------------|--------------------------------------------|----------------------------|----------------------|---------------------|----------------------|------------------------------|--------------------------------|----------------|-------------------------------------------------------------------------------|------------------------------------------------------------------------------------------------------------------------------|------------------------------------------------|
|              |                                                      |                   |                                 |                                                                                                                                                              |                                            |                            | Mode                 | Format              |                      | Last contact                 | End (step change in intensity) | N <sup>c</sup> | Frequency                                                                     | Length per session with description for varying lengths. (minutes <sup>b</sup> )                                             |                                                |
|              | Behavioral Weight Loss Treatment                     | Diet and exercise | Yes                             | Nutrition Edu.                                                                                                                                               | Psychologist/ Counsellor                   | Yes                        | Individual           | Face to Face        | Health Care          | 5.5                          | 5.5                            | 20             | 16 weekly sessions; 4 sessions at 2-week intervals                            | Individual weekly sessions: 50 mins                                                                                          | Yes                                            |
|              | Interpersonal Psychotherapy                          | Diet only         | Yes                             | Nutrition Edu.; Help following programme end                                                                                                                 | Psychologist/ Counsellor                   | Yes                        | Individual           | Face to Face        | Health Care          | 5.5                          | 5.5                            | 19             | 3 sessions over 2 weeks; 12 weekly sessions; 4 sessions over 2 week intervals | First session: 2 hours; All following sessions: 50 to 60 minutes. The total therapy time was the same as that for BWL group. | Yes                                            |
| Wilson 2016  | Control - Self Study Group                           | Diet and exercise | No                              | Nutrition Edu.                                                                                                                                               |                                            | No                         | Other – self-study   | Print               | Home                 |                              |                                | 1              |                                                                               |                                                                                                                              | No                                             |
|              | Phone Fuel Your Life                                 | Diet and exercise | Yes                             | Nutrition Edu.                                                                                                                                               | Health Trainer                             | No                         | Individual           | Telephone; Print    | Home                 | 12                           | 6                              | 11             | 0-2m: biweekly. 2-6m: monthly. 6-12m: bimonthly.                              | 20 mins' 8 sessions with a health coach                                                                                      | Yes                                            |
|              | Group Fuel Your Life                                 | Diet and exercise | Yes                             | Nutrition Edu.                                                                                                                                               | Health Trainer                             | No                         | Group                | Face to Face; Print | Workplace            | 12                           | 6                              | 11             | 0-2m: biweekly. 2-6m: monthly. 6-12m: bimonthly.                              | 60 mins' 8 sessions with a health coach                                                                                      | No                                             |
| Wilson 2016b | Control                                              | Control           | No                              |                                                                                                                                                              |                                            | No                         |                      |                     |                      |                              |                                |                |                                                                               |                                                                                                                              | No                                             |
|              | FUEL Your Life peer health coaches + nurse education | Diet and exercise | No                              | Nutrition Edu.                                                                                                                                               | Nurse (General); Dietitian; Health Trainer | Yes                        | Individual and Group | Face to Face; Print | Workplace            | 6                            | 6                              | 6              | Monthly                                                                       | Baseline: initial 1:1 session 0-6m: 6 x 10 min group sessions and weekly announcements.                                      | Yes                                            |
| Wing 1985    | Standard-care condition                              | Diet and exercise | No                              | Nutrition Edu.                                                                                                                                               | Psychologist/ Counsellor; Nutritionist     | No                         | Group                | Face to Face        |                      | 4                            | 4                              | 4              | Monthly                                                                       |                                                                                                                              | No                                             |
|              | Nutrition education                                  | Diet and exercise | No                              | Nutrition Edu.                                                                                                                                               | Psychologist/ Counsellor; Nutritionist     | No                         | Group                | Face to Face        |                      | 4                            | 4                              | 16             | Weekly                                                                        |                                                                                                                              | No                                             |
|              | Behavior modification                                | Diet and exercise | No                              | Nutrition Edu.; Fin. Incentives                                                                                                                              | Psychologist/ Counsellor; Nutritionist     | No                         | Group                | Face to Face        |                      | 4                            | 4                              | 16             | Weekly                                                                        |                                                                                                                              | No                                             |
| Wing 1988    | Diet plus placebo exercise                           | Diet only         | Yes                             | Nutrition Edu.; Fin. Incentives; Help                                                                                                                        |                                            |                            | Group                | Face to Face        | Health Care; Home    | 8.5                          | 2.5                            | 26             | Both groups participated in a behavioural weight                              | 1 hour                                                                                                                       | No                                             |

| Study ID   | Groups:                     | Intervention type | Intervention faded in intensity | Features<br>(meal replacements, nutrition education, financial incentives, intermittent fasting, content designed to help participants following programme end) | Provider <sup>a</sup>    | Provider training received | Delivery |              | Intervention setting | Intervention timing (months) |                                | Sessions       |                                                                                                                                                                                                                       |                                                                                  | Intervention personalised, titrated or adapted |
|------------|-----------------------------|-------------------|---------------------------------|-----------------------------------------------------------------------------------------------------------------------------------------------------------------|--------------------------|----------------------------|----------|--------------|----------------------|------------------------------|--------------------------------|----------------|-----------------------------------------------------------------------------------------------------------------------------------------------------------------------------------------------------------------------|----------------------------------------------------------------------------------|------------------------------------------------|
|            |                             |                   |                                 |                                                                                                                                                                 |                          |                            | Mode     | Format       |                      | Last contact                 | End (step change in intensity) | N <sup>c</sup> | Frequency                                                                                                                                                                                                             | Length per session with description for varying lengths. (minutes <sup>b</sup> ) |                                                |
|            |                             |                   |                                 | following programme end                                                                                                                                         |                          |                            |          |              |                      |                              |                                |                | control programme, with group meetings held twice a week for 10 weeks and monthly for the following 6m.                                                                                                               |                                                                                  |                                                |
|            | Diet plus moderate exercise | Diet and exercise | Yes                             | Nutrition Edu.; Fin. Incentives; Help following programme end                                                                                                   |                          |                            | Group    | Face to Face | Health Care; Home    | 8.5                          | 2.5                            | 26             | Both groups participated in a behavioural weight control programme, with group meetings held twice a week for 10 weeks and monthly for the following 6m.                                                              | 1 hour                                                                           | No                                             |
| Wing 1988b | Diet only                   | Diet only         | Yes                             | Nutrition Edu.; Fin. Incentives; ; Help following programme end                                                                                                 | Psychologist/ Counsellor | No                         | Group    | Face to Face | Health Care; Home    | 14                           | 2.5                            | 52             | Both groups attended treatment sessions 3 times/week (versus 2 times/week in Study 1) for 10 weeks. After this intensive training period, subjects met weekly for an additional 10 weeks and then monthly for a year. | 1 hour                                                                           | No                                             |
|            | Diet plus exercise          | Diet and exercise | Yes                             | Nutrition Edu.; Fin. Incentives; Help following programme end                                                                                                   | Psychologist/ Counsellor | No                         | Group    | Face to Face | Health Care; Home    | 14                           | 2.5                            | 52             | Both groups attended treatment sessions 3 times/week (versus 2 times/week in Study 1) for 10 weeks. After this intensive training period, subjects met weekly for an additional 10 weeks                              | 1 hour                                                                           | No                                             |

| Study ID  | Groups:                                                                                                      | Intervention type | Intervention faded in intensity | Features<br>(meal replacements, nutrition education, financial incentives, intermittent fasting, content designed to help participants following programme end) | Provider <sup>a</sup>   | Provider training received | Delivery |              | Intervention setting | Intervention timing (months) |                                | Sessions       |                                                                                                                              |                                                                                  | Intervention personalized, titrated or adapted |
|-----------|--------------------------------------------------------------------------------------------------------------|-------------------|---------------------------------|-----------------------------------------------------------------------------------------------------------------------------------------------------------------|-------------------------|----------------------------|----------|--------------|----------------------|------------------------------|--------------------------------|----------------|------------------------------------------------------------------------------------------------------------------------------|----------------------------------------------------------------------------------|------------------------------------------------|
|           |                                                                                                              |                   |                                 |                                                                                                                                                                 |                         |                            | Mode     | Format       |                      | Last contact                 | End (step change in intensity) | N <sup>c</sup> | Frequency                                                                                                                    | Length per session with description for varying lengths. (minutes <sup>b</sup> ) |                                                |
|           |                                                                                                              |                   |                                 |                                                                                                                                                                 |                         |                            |          |              |                      |                              |                                |                | and then monthly for a year.                                                                                                 |                                                                                  |                                                |
| Wing 1991 | Behavior therapy alone                                                                                       | Diet and exercise | Yes                             | Nutrition Edu.                                                                                                                                                  | Psychologist/Counsellor | No                         | Group    | Face to Face | Inpatient; Home      | 17                           | 5                              | 25             | Weekly meetings for 20 weeks, Maintenance meetings at 24, 28, 46, 72 weeks                                                   | No                                                                               |                                                |
|           | Behavior therapy plus VLCD                                                                                   | Diet and exercise | No                              | MR-P; Nutrition Edu.                                                                                                                                            | Psychologist/Counsellor | No                         | Group    | Face to Face | Inpatient; Home      | 17                           | 5                              | 31             | Weekly meetings for 20 weeks, Maintenance meetings at 24, 28, 46, 72 weeks PLUS biweekly meetings with the physician for 3m. | No                                                                               |                                                |
| Wing 1996 | Standard Behavioral Treatment (SBT)                                                                          | Diet and exercise | No                              | Nutrition Edu.                                                                                                                                                  | Psychologist/Counsellor | No                         | Group    | Face to Face |                      | 6                            | 6                              | 26             | Weekly                                                                                                                       | No                                                                               |                                                |
|           | SBT plus structured meal plans and grocery lists (menu)                                                      | Diet and exercise | No                              | Nutrition Edu.                                                                                                                                                  | Psychologist/Counsellor | No                         | Group    | Face to Face |                      | 6                            | 6                              | 26             | Weekly                                                                                                                       | No                                                                               |                                                |
|           | SBT plus structured meal plans plus food provision with participants sharing the cost of the food (Buy food) | Diet and exercise | No                              | MR-F; Nutrition Edu.                                                                                                                                            | Psychologist/Counsellor | No                         | Group    | Face to Face |                      | 6                            | 6                              | 26             | Weekly                                                                                                                       | No                                                                               |                                                |
|           | SBT plus structured meal plans plus food                                                                     | Diet and exercise | No                              | MR-F; Nutrition Edu.                                                                                                                                            | Psychologist/Counsellor | No                         | Group    | Face to Face |                      | 6                            | 6                              | 26             | Weekly                                                                                                                       | No                                                                               |                                                |

| Study ID  | Groups:                                           | Intervention type | Intervention faded in intensity | Features<br>(meal replacements, nutrition education, financial incentives, intermittent fasting, content designed to help participants following programme end) | Provider <sup>a</sup>                                      | Provider training received | Delivery |              | Intervention setting | Intervention timing (months) |                                | Sessions       |                                                   |                                                                                                                               | Intervention personalized, titrated or adapted |
|-----------|---------------------------------------------------|-------------------|---------------------------------|-----------------------------------------------------------------------------------------------------------------------------------------------------------------|------------------------------------------------------------|----------------------------|----------|--------------|----------------------|------------------------------|--------------------------------|----------------|---------------------------------------------------|-------------------------------------------------------------------------------------------------------------------------------|------------------------------------------------|
|           |                                                   |                   |                                 |                                                                                                                                                                 |                                                            |                            | Mode     | Format       |                      | Last contact                 | End (step change in intensity) | N <sup>c</sup> | Frequency                                         | Length per session with description for varying lengths. (minutes <sup>b</sup> )                                              |                                                |
|           | provision with the food provided free (free food) |                   |                                 |                                                                                                                                                                 |                                                            |                            |          |              |                      |                              |                                |                |                                                   |                                                                                                                               |                                                |
| Wing 1998 | Control                                           | Diet and exercise | No                              | Nutrition Edu.                                                                                                                                                  |                                                            | No                         |          | Print        |                      |                              |                                |                |                                                   |                                                                                                                               | No                                             |
|           | Diet                                              | Diet only         | No                              | Nutrition Edu.; Help following programme end                                                                                                                    | Psychologist/ Counsellor; Dietitian                        | No                         | Group    | Face to Face | Community; Home      | 24                           | 6                              | 51             | Weekly for the first 6m; Biweekly for the next 6m |                                                                                                                               | No                                             |
|           | Exercise                                          | Exercise only     | No                              |                                                                                                                                                                 | Psychologist/ Counsellor; Exercise physiologist            | No                         | Group    | Face to Face | Community; Home      | 24                           | 6                              | 51             | Weekly for the first 6m; Biweekly for the next 6m | 50 – 60 min walk with the therapist at each of these weekly meetings.                                                         | No                                             |
|           | Diet plus exercise                                | Diet and exercise | No                              | Nutrition Edu.; Help following programme end                                                                                                                    | Psychologist/ Counsellor; Dietitian; Exercise physiologist | No                         | Group    | Face to Face | Community; Home      | 24                           | 6                              | 51             | Weekly for the first 6m; Biweekly for the next 6m |                                                                                                                               | No                                             |
| Wing 2003 | No break group (control)                          | Diet and exercise | No                              | Nutrition Edu.; Help following programme end                                                                                                                    |                                                            |                            | Group    | Face to Face |                      | 4                            | 4                              | 14             | Weekly                                            | The control group completed the 14 sessions on 14 consecutive weeks, as would be typical of a behavioral weight loss program. | Yes                                            |
|           | Long break group                                  | Diet and exercise | No                              | Nutrition Edu.; Help following programme end                                                                                                                    |                                                            |                            | Group    | Face to Face |                      | 5                            | 5                              | 14             |                                                   | The long break group (LB) took a 6-week break after the seventh lesson.                                                       | Yes                                            |
|           | Short break group                                 | Diet and exercise | No                              | Nutrition Edu.; Help following programme end                                                                                                                    |                                                            |                            | Group    | Face to Face |                      | 5                            | 5                              | 14             |                                                   | The short break group (SB) took 2-week breaks after the                                                                       | Yes                                            |

| Study ID          | Groups:                                                 | Intervention type | Intervention faded in intensity | Features<br>(meal replacements, nutrition education, financial incentives, intermittent fasting, content designed to help participants following programme end) | Provider <sup>a</sup>    | Provider training received | Delivery             |                                   | Intervention setting | Intervention timing (months) |                                | Sessions       |                                                        |                                                                                    | Intervention personalised, titrated or adapted |
|-------------------|---------------------------------------------------------|-------------------|---------------------------------|-----------------------------------------------------------------------------------------------------------------------------------------------------------------|--------------------------|----------------------------|----------------------|-----------------------------------|----------------------|------------------------------|--------------------------------|----------------|--------------------------------------------------------|------------------------------------------------------------------------------------|------------------------------------------------|
|                   |                                                         |                   |                                 |                                                                                                                                                                 |                          |                            | Mode                 | Format                            |                      | Last contact                 | End (step change in intensity) | N <sup>c</sup> | Frequency                                              | Length per session with description for varying lengths. (minutes <sup>b</sup> )   |                                                |
|                   |                                                         |                   |                                 |                                                                                                                                                                 |                          |                            |                      |                                   |                      |                              |                                |                |                                                        | third, sixth, and ninth lessons.                                                   |                                                |
| Wing 2010         | Structured Education Program                            | Diet and exercise | Yes                             | Nutrition Edu.                                                                                                                                                  | Psychologist/ Counsellor | Unclear                    | Group                | Face to Face                      | Community            | 15                           | 6                              | 7              | Months 1, 2, 3, 4, 6, 9, and 15                        | 1 hour                                                                             | No                                             |
|                   | Weight Loss Intervention (Skills Based maintenance)     | Diet and exercise | Yes                             | MR-P; Nutrition Edu.; Help following programme end                                                                                                              | Psychologist/ Counsellor | Yes                        | Group                | Face to Face                      | Community            | 18                           | 6                              | 50             | Weekly for 6 months and every other week for 12 months | 1 hour                                                                             | Yes                                            |
|                   | Weight Loss Intervention (Motivation Based maintenance) | Diet and exercise | Yes                             | MR-P; Nutrition Edu.; Help following programme end                                                                                                              | Psychologist/ Counsellor | Yes                        | Group                | Face to Face                      | Community            | 18                           | 6                              | 50             | Weekly for 6 months and every other week for 12 months | 1 hour                                                                             | Yes                                            |
| Yanna koulia 2008 | Usual care group                                        | Control           | No                              | Nutrition Edu.                                                                                                                                                  | Dietitian                | No                         | Individual           | Face to Face                      | Health Care          |                              |                                | 1              |                                                        |                                                                                    | Yes                                            |
|                   | Intensive care group                                    | Diet and exercise | No                              | Nutrition Edu.                                                                                                                                                  | Dietitian                | No                         | Individual           | Face to Face                      | Health Care          | 2                            | 2                              | 5              | Every two weeks                                        |                                                                                    | Yes                                            |
| Yardley 2014      | Usual care                                              | Control           | No                              |                                                                                                                                                                 | Other AHPs               | No                         |                      |                                   | Health Care          |                              |                                | 0              |                                                        |                                                                                    |                                                |
|                   | Web-based only                                          | Diet and exercise | No                              | Nutrition Edu.; Help following programme end                                                                                                                    |                          | No                         | Individual           | Internet; Other                   | Health Care; Home    | 3                            | 3                              | 0              | Instructed to access website weekly                    |                                                                                    | Yes                                            |
|                   | Basic nurse support                                     | Diet and exercise | Yes                             | Nutrition Edu.; Help following programme end                                                                                                                    | Nurse (General)          | No                         | Individual           | Face to Face; Telephone; Internet | Health Care; Home    | 3                            | 3                              | 3              | 2 weeks, 1m, 3m                                        | 15 – 20                                                                            | Yes                                            |
|                   | Regular nurse support                                   | Diet and exercise | No                              | Nutrition Edu.; Help following programme end                                                                                                                    | Nurse (General)          | No                         | Individual           | Face to Face; Telephone; Internet | Health Care; Home    | 6                            | 6                              | 7              | 2 weeks, and then monthly for the first 6m             | 15 – 20                                                                            | Yes                                            |
| Yates 2009        | Control group                                           | Control           | No                              |                                                                                                                                                                 |                          | No                         |                      | Print                             |                      |                              |                                | 0              |                                                        |                                                                                    | No                                             |
|                   | PREPARE group                                           | Diet and exercise | No                              | Nutrition Edu.                                                                                                                                                  | Health Trainer           | No                         | Individual and Group | Face to Face                      | Community            | 6                            | 6                              | 3              | 1, 3 and 6m                                            | The first session lasted 180 min and the follow-up review progress lasted 10 mins. | Yes                                            |

| Study ID   | Groups:                        | Intervention type | Intervention faded in intensity | Features<br>(meal replacements, nutrition education, financial incentives, intermittent fasting, content designed to help participants following programme end) | Provider <sup>a</sup> | Provider training received | Delivery             |                                   | Intervention setting | Intervention timing (months) |                                | Sessions       |                                                                               |                                                                                                                                          | Intervention personalized, titrated or adapted |
|------------|--------------------------------|-------------------|---------------------------------|-----------------------------------------------------------------------------------------------------------------------------------------------------------------|-----------------------|----------------------------|----------------------|-----------------------------------|----------------------|------------------------------|--------------------------------|----------------|-------------------------------------------------------------------------------|------------------------------------------------------------------------------------------------------------------------------------------|------------------------------------------------|
|            |                                |                   |                                 |                                                                                                                                                                 |                       |                            | Mode                 | Format                            |                      | Last contact                 | End (step change in intensity) | N <sup>c</sup> | Frequency                                                                     | Length per session with description for varying lengths. (minutes <sup>b</sup> )                                                         |                                                |
|            | PREPARE with pedometer         | Diet and exercise | No                              | Nutrition Edu.                                                                                                                                                  | Health Trainer        | No                         | Individual and Group | Face to Face                      | Community            | 6                            | 6                              | 3              | 1, 3 and 6m                                                                   | The first session lasted 180 min and the follow-up review progress lasted 10 mins.                                                       | Yes                                            |
| Yates 2018 | Placebo + no lifestyle         | Control           | No                              |                                                                                                                                                                 |                       |                            |                      |                                   |                      |                              |                                |                |                                                                               |                                                                                                                                          |                                                |
|            | Metformin + no lifestyle (N/A) | N/A               | N/A                             | N/A                                                                                                                                                             | N/A                   | N/A                        | N/A                  | N/A                               | N/A                  | N/A                          | N/A                            | N/A            | N/A                                                                           | N/A                                                                                                                                      | N/A                                            |
|            | Placebo + lifestyle            | Diet and exercise | No                              | Nutrition Edu.                                                                                                                                                  |                       | No                         | Individual and Group | Face to Face                      |                      | 4                            | 4                              | 16             | Weekly                                                                        |                                                                                                                                          | Yes                                            |
|            | Metformin + lifestyle (N/A)    | N/A               | N/A                             | N/A                                                                                                                                                             | N/A                   | N/A                        | N/A                  | N/A                               | N/A                  | N/A                          | N/A                            | N/A            | N/A                                                                           | N/A                                                                                                                                      | N/A                                            |
| Yeh 2003   | Counseling based intervention  | Diet and exercise | Yes                             | Nutrition Edu.; Help following programme end                                                                                                                    | Dietitian             | No                         | Individual           | Face to Face                      | Community            | 6                            | 6                              | 6              | Monthly                                                                       | 2 x 1 hour. 4 x 30 min.                                                                                                                  | Yes                                            |
|            | Skills based intervention      | Diet only         | No                              | Nutrition Edu.; Help following programme end                                                                                                                    | Dietitian             | No                         | Individual and Group | Face to Face; Telephone; Internet | Community; Home      | 6                            | 6                              | 7              | Monthly                                                                       | 2 x 90 mins<br>2 x 2 hour (supermarket)<br>2 x 90 mins (restaurant)<br>1 x 2 hr (home)                                                   | Yes                                            |
| Yeh 2016   | Control group                  | Control           | No                              |                                                                                                                                                                 |                       | No                         |                      |                                   |                      |                              |                                |                |                                                                               |                                                                                                                                          |                                                |
|            | Intervention group             | Diet and exercise | Yes                             | Nutrition Edu.                                                                                                                                                  | Health Trainer        | No                         | Group                | Face to Face                      | Community            | 12                           | 6                              | 18             | Every second week the first six months and monthly during the second semester | 1.5-2 hours                                                                                                                              | Yes                                            |
| Yin 2018   | Comparison-Control Group       | Diet and exercise | No                              | Nutrition Edu.                                                                                                                                                  | Nurse (General)       | No                         | Individual and Group | Face to Face                      | Health Care          | 6                            | 6                              | 7              | Every three-four weeks                                                        | Participants in the comparison group received a counselling session and were invited to attend 6 general health education classes on PA, |                                                |



| Study ID   | Groups:            | Intervention type | Intervention faded in intensity | Features<br>(meal replacements, nutrition education, financial incentives, intermittent fasting, content designed to help participants following programme end) | Provider <sup>a</sup> | Provider training received | Delivery                                                                         |                         | Intervention setting | Intervention timing (months) |                                | Sessions       |                     |                                                                                                                                                                                                                                                                           | Intervention personalized, titrated or adapted |
|------------|--------------------|-------------------|---------------------------------|-----------------------------------------------------------------------------------------------------------------------------------------------------------------|-----------------------|----------------------------|----------------------------------------------------------------------------------|-------------------------|----------------------|------------------------------|--------------------------------|----------------|---------------------|---------------------------------------------------------------------------------------------------------------------------------------------------------------------------------------------------------------------------------------------------------------------------|------------------------------------------------|
|            |                    |                   |                                 |                                                                                                                                                                 |                       |                            | Mode                                                                             | Format                  |                      | Last contact                 | End (step change in intensity) | N <sup>c</sup> | Frequency           | Length per session with description for varying lengths. (minutes <sup>b</sup> )                                                                                                                                                                                          |                                                |
|            |                    |                   |                                 |                                                                                                                                                                 |                       |                            |                                                                                  |                         |                      |                              |                                |                |                     | nutrition, chronic diseases (obesity, diabetes, heart diseases) and menopause at the same venue as the intervention group.                                                                                                                                                |                                                |
|            | Intervention Group | Diet and exercise | No                              | Nutrition Edu.                                                                                                                                                  | Health Trainer        | Yes                        | Individual and Group                                                             | Face to Face; Telephone | Health Care; Home    | 6                            | 6                              | 22             | Weekly              | 1 hour                                                                                                                                                                                                                                                                    | Yes                                            |
| Zhang 2016 | Control            | Control           | Yes                             |                                                                                                                                                                 | Other                 | No                         | Group                                                                            | Face to Face            |                      | 12                           | 12                             | 18             | Biweekly            | All participants attended group health education sessions, which were held biweekly in the first 6m and monthly in the last 6m of the intervention.                                                                                                                       | No                                             |
|            | Moderate exercise  | Exercise only     | No                              |                                                                                                                                                                 | Other                 | No                         | Other - education sessions: group-based; moderate-exercise sessions unsupervised | Face to Face; Telephone | Home                 | 12                           | 12                             | 18             | Biweekly and weekly | Participants were instructed to briskly walk at approximately 120 steps per minute for 30 minutes per session and 5 sessions per week.<br><br>All participants attended group health education sessions, which were held biweekly in the first 6m and monthly in the last | No                                             |

| Study ID | Groups:                    | Intervention type | Intervention faded in intensity | Features<br>(meal replacements, nutrition education, financial incentives, intermittent fasting, content designed to help participants following programme end) | Provider <sup>a</sup> | Provider training received | Delivery             |                            | Intervention setting | Intervention timing (months) |                                | Sessions       |                     |                                                                                                                                                                                                                                                                                                                                                                                    | Intervention personalized, titrated or adapted |
|----------|----------------------------|-------------------|---------------------------------|-----------------------------------------------------------------------------------------------------------------------------------------------------------------|-----------------------|----------------------------|----------------------|----------------------------|----------------------|------------------------------|--------------------------------|----------------|---------------------|------------------------------------------------------------------------------------------------------------------------------------------------------------------------------------------------------------------------------------------------------------------------------------------------------------------------------------------------------------------------------------|------------------------------------------------|
|          |                            |                   |                                 |                                                                                                                                                                 |                       |                            | Mode                 | Format                     |                      | Last contact                 | End (step change in intensity) | N <sup>c</sup> | Frequency           | Length per session with description for varying lengths. (minutes <sup>b</sup> )                                                                                                                                                                                                                                                                                                   |                                                |
|          |                            |                   |                                 |                                                                                                                                                                 |                       |                            |                      |                            |                      |                              |                                |                |                     | 6m of the intervention.<br><br>plus, Participants in the moderate exercise program were required to wear pedometers and record their daily exercise in a log, which was reviewed weekly by study staff.                                                                                                                                                                            |                                                |
|          | Vigorous-moderate exercise | Exercise only     | No                              |                                                                                                                                                                 | Physician;<br>Other   | No                         | Individual and Group | Face to Face;<br>Telephone | Community;<br>Home   | 12                           | 12                             | 138            | Biweekly and weekly | Participants were required to participate in 5, 30-min., vigorous exercise sessions each week supervised by a study physician at a local community health center.<br><br>All participants attended group health education sessions, which were held biweekly in the first 6m and monthly in the last 6m of the intervention.<br><br>Participants were required to participate in 5 | No                                             |

| Study ID     | Groups:         | Intervention type | Intervention faded in intensity | Features<br>(meal replacements, nutrition education, financial incentives, intermittent fasting, content designed to help participants following programme end) | Provider <sup>a</sup>               | Provider training received | Delivery             |                                        | Intervention setting | Intervention timing (months) |                                | Sessions       |           |                                                                                                                                                                                                                                                                                                                                                                                                           | Intervention personalized, titrated or adapted |
|--------------|-----------------|-------------------|---------------------------------|-----------------------------------------------------------------------------------------------------------------------------------------------------------------|-------------------------------------|----------------------------|----------------------|----------------------------------------|----------------------|------------------------------|--------------------------------|----------------|-----------|-----------------------------------------------------------------------------------------------------------------------------------------------------------------------------------------------------------------------------------------------------------------------------------------------------------------------------------------------------------------------------------------------------------|------------------------------------------------|
|              |                 |                   |                                 |                                                                                                                                                                 |                                     |                            | Mode                 | Format                                 |                      | Last contact                 | End (step change in intensity) | N <sup>c</sup> | Frequency | Length per session with description for varying lengths. (minutes <sup>b</sup> )                                                                                                                                                                                                                                                                                                                          |                                                |
|              |                 |                   |                                 |                                                                                                                                                                 |                                     |                            |                      |                                        |                      |                              |                                |                |           | <p>vigorous exercise sessions each week supervised by a study physician at a local community health center. After 6 months of vigorous exercise, participants switched to moderate exercise for another 6 months.</p> <p>plus,<br/>Participants in the moderate exercise program were required to wear pedometers and record their daily exercise in a log, which was reviewed weekly by study staff.</p> |                                                |
| Zwicker 2016 | CBT + Minimal   | Diet and exercise | Yes                             | Nutrition Edu.; Help following programme end                                                                                                                    | Psychologist/ Counsellor; Dietitian | No                         | Individual and Group | Face to Face; Telephone; SMS           | Community            | 6                            | 3                              |                |           | All sessions were 90 min in duration, with the exception of the first session which was 120 min.                                                                                                                                                                                                                                                                                                          | No                                             |
|              | CBT + Intensive | Diet and exercise | Yes                             | Nutrition Edu.; Help following programme end                                                                                                                    | Psychologist/ Counsellor; Dietitian | No                         | Individual and Group | Face to Face; Telephone; Internet; SMS | Community            | 9                            | 3                              |                |           | All sessions were 90 min in duration, with the exception of the first session which was 120 min. 3-6m daily text                                                                                                                                                                                                                                                                                          | No                                             |

| Study ID | Groups: | Intervention type | Intervention faded in intensity | Features<br>(meal replacements, nutrition education, financial incentives, intermittent fasting, content designed to help participants following programme end) | Provider <sup>a</sup> | Provider training received | Delivery |        | Intervention setting | Intervention timing (months) |                                | Sessions       |           |                                                                                  | Intervention personalized, titrated or adapted |
|----------|---------|-------------------|---------------------------------|-----------------------------------------------------------------------------------------------------------------------------------------------------------------|-----------------------|----------------------------|----------|--------|----------------------|------------------------------|--------------------------------|----------------|-----------|----------------------------------------------------------------------------------|------------------------------------------------|
|          |         |                   |                                 |                                                                                                                                                                 |                       |                            | Mode     | Format |                      | Last contact                 | End (step change in intensity) | N <sup>c</sup> | Frequency | Length per session with description for varying lengths. (minutes <sup>b</sup> ) |                                                |
|          |         |                   |                                 |                                                                                                                                                                 |                       |                            |          |        |                      |                              |                                |                |           | messages, 6-9m weekly text messages                                              |                                                |

**Approx.:** Approximately; **Appt.:** Appointment/s; **Fin. Incentives:** Financial Incentives; **GP:** General Practitioner **Inter. Fasting:** Intermittent Fasting; **Min/s:** Minute/s **M/Mths:** month/s; **MR – F** = Meal replacement (Full); **MR – P** = Meal replacement (Partial); **N:** Number; **N/A:** Not applicable; **NR:** Not reported; **Nutrition Edu.** = Nutrition Education; **PA:** Physical Activity; **SMS:** Short Message Service; **VLCD:** Very low-calorie diet

<sup>a</sup> See table below for Provider category descriptions <sup>b</sup> Unless otherwise stated; <sup>c</sup> Exercise sessions were assumed to be unsupervised and did not contribute to the number of sessions unless otherwise stated.

| Provider                          | Provider descriptions as reported in included studies                                                                                                                                                                                                                                                                                                                                                                                                                                                                                                                                                                                                                                                                                                                                                                                                                                                                                                                                                                                                                                                                                                                                                                                                                                                                                                                                                                                                                                                                                                                                                                                                                                                                              |
|-----------------------------------|------------------------------------------------------------------------------------------------------------------------------------------------------------------------------------------------------------------------------------------------------------------------------------------------------------------------------------------------------------------------------------------------------------------------------------------------------------------------------------------------------------------------------------------------------------------------------------------------------------------------------------------------------------------------------------------------------------------------------------------------------------------------------------------------------------------------------------------------------------------------------------------------------------------------------------------------------------------------------------------------------------------------------------------------------------------------------------------------------------------------------------------------------------------------------------------------------------------------------------------------------------------------------------------------------------------------------------------------------------------------------------------------------------------------------------------------------------------------------------------------------------------------------------------------------------------------------------------------------------------------------------------------------------------------------------------------------------------------------------|
| Nurse (Specialist)                |                                                                                                                                                                                                                                                                                                                                                                                                                                                                                                                                                                                                                                                                                                                                                                                                                                                                                                                                                                                                                                                                                                                                                                                                                                                                                                                                                                                                                                                                                                                                                                                                                                                                                                                                    |
| Nurse (General)                   | Nurse educator; RNS;                                                                                                                                                                                                                                                                                                                                                                                                                                                                                                                                                                                                                                                                                                                                                                                                                                                                                                                                                                                                                                                                                                                                                                                                                                                                                                                                                                                                                                                                                                                                                                                                                                                                                                               |
| GP                                | General internists                                                                                                                                                                                                                                                                                                                                                                                                                                                                                                                                                                                                                                                                                                                                                                                                                                                                                                                                                                                                                                                                                                                                                                                                                                                                                                                                                                                                                                                                                                                                                                                                                                                                                                                 |
| Physician (Any doctor not a GP)   | Medical doctors; Specialists in endocrinology, and internal medicine; Clinicians; Endocrinologists; Graduates in medicine; Research cardiologist; Doctoral-level clinicians (with an average of 4.8 years of experience delivering behavioral weight loss treatment); Occupational doctor.                                                                                                                                                                                                                                                                                                                                                                                                                                                                                                                                                                                                                                                                                                                                                                                                                                                                                                                                                                                                                                                                                                                                                                                                                                                                                                                                                                                                                                         |
| Psychologist/ Counsellor          | Therapist; Masters-level counseling psychology students; MA in behavioural psychology; Lifestyle counsellor; Graduates in psychology; Psychology graduate students; Advanced degree in behavioral psychology; Mental health counsellor; Wellness counsellors; Professional Counsellor; Psychotherapist; Psychotherapists and masters students graduate students in clinical psychology; Clinical psychology graduate students; Lifestyle counsellor; Clinical psychology graduate students; Experienced behavioural weight control counsellors; Behavior therapist; Counsellor with a degree in nutrition or physical activity                                                                                                                                                                                                                                                                                                                                                                                                                                                                                                                                                                                                                                                                                                                                                                                                                                                                                                                                                                                                                                                                                                     |
| Dietitian                         | Dietitian; Masters of Dietetics Students                                                                                                                                                                                                                                                                                                                                                                                                                                                                                                                                                                                                                                                                                                                                                                                                                                                                                                                                                                                                                                                                                                                                                                                                                                                                                                                                                                                                                                                                                                                                                                                                                                                                                           |
| Nutritionist                      | Provider described by authors as nutritionist; Nutrition technician; Graduates in nutrition; Advanced degree in nutrition; Nutritional interventionist; Nutritionist (MSc in nutrition); Nutrition/Diet interventionists; Two qualified or student clinical nutritionists                                                                                                                                                                                                                                                                                                                                                                                                                                                                                                                                                                                                                                                                                                                                                                                                                                                                                                                                                                                                                                                                                                                                                                                                                                                                                                                                                                                                                                                          |
| Physiotherapist                   | Physical therapist; Physical/recreational therapists                                                                                                                                                                                                                                                                                                                                                                                                                                                                                                                                                                                                                                                                                                                                                                                                                                                                                                                                                                                                                                                                                                                                                                                                                                                                                                                                                                                                                                                                                                                                                                                                                                                                               |
| Exercise physiologist             | Exercise consultants; MA in exercise physiology; Graduates in physical activity and sport science (SPAS); Advanced degree in exercise physiology; Exercise counsellors                                                                                                                                                                                                                                                                                                                                                                                                                                                                                                                                                                                                                                                                                                                                                                                                                                                                                                                                                                                                                                                                                                                                                                                                                                                                                                                                                                                                                                                                                                                                                             |
| Other Allied Health Professionals | Occupational therapist; Pharmacist; Nurses/physician assistants; Hospital staff; Social worker with special competence in CT; Medical-assistant                                                                                                                                                                                                                                                                                                                                                                                                                                                                                                                                                                                                                                                                                                                                                                                                                                                                                                                                                                                                                                                                                                                                                                                                                                                                                                                                                                                                                                                                                                                                                                                    |
| Health trainer                    | Lifestyle coaches; Mindfulness meditation instructors; Community health educator; MA in health education; Behavioural consultant; Health educator; Telephone counsellors; Trained lifestyle coaches; Health Promotion coaches; Weight loss coaches; Wellness leader; Weight Watchers leader; Trained interventionists with expertise in both content area (i.e., physical activity and nutrition) and behavioral therapy; Food advisors recruited from local community; Community Health Workers; Lifestyle activity consultant; Trained lifestyle coaches; Lifestyle Coach/ medical assistant; Masters-level staff with extensive training in behavioral weight loss; Nutrition health educator; IHM health staff graduates; 6 trained CAMWEL advisors recruited from various occupational backgrounds including healthcare, in line with the NHS health trainers initiative; Weight loss group leaders supervised by an exercise physiologist; Study coordinator (with health/nutrition background) together with a peer leader/study coordinator (experienced in adult training and self-management programs); Health educator; Degree in health sciences; Trainers (for meal replacement group); Health coach and health practitioner backgrounds and trained by the senior psychologists; Diabetes educators; EuroFIT coaches; Program providers who were trained in nutrition, education, and behavioral interventions; Masters degree-level health educators delivered health education sessions; Behaviorist; Trained lay health educators (LHEs) (community volunteers or existing senior center staff); Peer health coach; Educators held an undergraduate degree in a relevant discipline (dietician, sports scientist) |
| Personal Trainer                  | Certified exercise trainer; Trained fitness instructor; Physical activity specialist; Football coaching staff; Physical Activity Counselor; Trained interventionist and exercise coaches who were skilled in exercise science; Exercise programme supervised by a professional trainer; Fitness professional; Exercise interventionists; Exercised in a supervised setting; Trained certified technicians assessed each participant; Sports therapist; Exercise specialists;                                                                                                                                                                                                                                                                                                                                                                                                                                                                                                                                                                                                                                                                                                                                                                                                                                                                                                                                                                                                                                                                                                                                                                                                                                                       |

| Study ID                                            | Groups:                                                                                                                                                                                                                                                                                                                                                                                                                                                                                                                                                                                                                                                                                                                                                                                                                                                                                                                                                                                                                                                                                                          | Intervention type | Intervention faded in intensity | Features<br>(meal replacements, nutrition education, financial incentives, intermittent fasting, content designed to help participants following programme end) | Provider <sup>a</sup> | Provider training received | Delivery |        | Intervention setting | Intervention timing (months) |                                | Sessions       |           |                                                                                  | Intervention personalized, titrated or adapted |
|-----------------------------------------------------|------------------------------------------------------------------------------------------------------------------------------------------------------------------------------------------------------------------------------------------------------------------------------------------------------------------------------------------------------------------------------------------------------------------------------------------------------------------------------------------------------------------------------------------------------------------------------------------------------------------------------------------------------------------------------------------------------------------------------------------------------------------------------------------------------------------------------------------------------------------------------------------------------------------------------------------------------------------------------------------------------------------------------------------------------------------------------------------------------------------|-------------------|---------------------------------|-----------------------------------------------------------------------------------------------------------------------------------------------------------------|-----------------------|----------------------------|----------|--------|----------------------|------------------------------|--------------------------------|----------------|-----------|----------------------------------------------------------------------------------|------------------------------------------------|
|                                                     |                                                                                                                                                                                                                                                                                                                                                                                                                                                                                                                                                                                                                                                                                                                                                                                                                                                                                                                                                                                                                                                                                                                  |                   |                                 |                                                                                                                                                                 |                       |                            | Mode     | Format |                      | Last contact                 | End (step change in intensity) | N <sup>c</sup> | Frequency | Length per session with description for varying lengths. (minutes <sup>b</sup> ) |                                                |
| Health care professional (not specified)            | Church health advisors (CHAs) were members of their respective church's health ministry (e.g., nurses, pharmacists, physicians) and were trained by a co-investigator certified to perform GLB training; Standard clinical care provider; Hospital based care; Primary care providers; Master's trained health professionals; health professional                                                                                                                                                                                                                                                                                                                                                                                                                                                                                                                                                                                                                                                                                                                                                                |                   |                                 |                                                                                                                                                                 |                       |                            |          |        |                      |                              |                                |                |           |                                                                                  |                                                |
| Other                                               | Research staff; Behavioral specialist; PhD-level interventionists; Doctoral level graduate students; Research assistant; Case manager; Coaches; YMCA staff; Peer leader; Teacher; Interventionist; Successful group members selected through interview; Varied, may be successful slimmers; Well-trained investigators; Research assistant; PhD holders or PhD candidates in at least their third year of study; BE WELL intervention staff; Physical activity, psychological support male researcher; The tutors; Study investigator; Ergonomist; Study coordinator; Interventionist; Cooperative Extension Service Family and Consumer Sciences Agents or individuals with bachelors or masters degrees in nutrition, exercise science, or psychology; Study partner; Trained interventionists; Group facilitator; External people representing diverse areas of expertise; Two experienced coleaders; Administrative study staff (not intervention staff); Trained graduate or undergraduate students; Had backgrounds in dietetics, psychology and/or exercise physiology; Primary investigator; Study staff |                   |                                 |                                                                                                                                                                 |                       |                            |          |        |                      |                              |                                |                |           |                                                                                  |                                                |
| If it was an OR between providers, both were listed |                                                                                                                                                                                                                                                                                                                                                                                                                                                                                                                                                                                                                                                                                                                                                                                                                                                                                                                                                                                                                                                                                                                  |                   |                                 |                                                                                                                                                                 |                       |                            |          |        |                      |                              |                                |                |           |                                                                                  |                                                |

**Table 6. Results from sensitivity analyses; univariate**

| <b>Characteristic</b>                                  | <b>Pre-planned (removing studies at high risk)</b> |                                | <b>Post-hoc (removing studies at unclear and high risk)</b> |                                |
|--------------------------------------------------------|----------------------------------------------------|--------------------------------|-------------------------------------------------------------|--------------------------------|
|                                                        | <b>Trend estimate (kg/month)</b>                   | <b>95% confidence interval</b> | <b>Trend estimate (kg/month)</b>                            | <b>95% confidence interval</b> |
| Weight loss at programme end (kg)                      | 0.013                                              | 0.01 to 0.017                  | 0.0099                                                      | 0.0062 to 0.014                |
| Rate of weight loss during the programme (kg per year) | 0.032                                              | 0.02 to 0.044                  | 0.022                                                       | 0.0094 to 0.035                |
| Partial meal replacement                               | 0.15                                               | 0.087 to 0.21                  | 0.11                                                        | -0.0033 to 0.23                |
| Total meal replacement                                 | 0.071                                              | 0.017 to 0.12                  | 0.067                                                       | 0.017 to 0.12                  |
| Programme involved changes to diet                     | 0.021                                              | -0.12 to 0.081                 | -0.17                                                       | -0.19 to 0.53                  |
| Programme involved changes to physical activity        | 0.019                                              | -0.013 to 0.052                | -0.024                                                      | -0.084 to 0.038                |
| Intervention help                                      | -0.026                                             | -0.05 to -0.0022               | 0.0056                                                      | -0.039 to 0.051                |
| Intervention faded in intensity                        | -0.011                                             | -0.039 to 0.017                | 0.039                                                       | -0.014 to 0.092                |
| Setting (inpatient)                                    | 0.17                                               | -0.012 to 0.34                 | -0.069                                                      | -0.62 to 0.48                  |
| Setting (Residential)                                  | -0.014                                             | -0.11 to 0.08                  | NE                                                          | NE                             |
| Financial incentives                                   | 0.11                                               | 0.026 to 0.2                   | 0.15                                                        | -0.079 to 0.37                 |
| Fasting (yes)                                          | 0.07                                               | -0.32 to 0.46                  | -0.0093                                                     | -0.32 to 0.3                   |
| Outside (yes)                                          | -0.3                                               | -0.44 to -0.17                 | -0.013                                                      | -0.23 to 0.21                  |
| Last contact (months)                                  | -0.00002                                           | -0.0017 to 0.0017              | -0.015                                                      | -0.044 to 0.015                |

**Table 7. Results from sensitivity analysis; model a**

| <b>Characteristic</b>                                  | <b>Pre-planned (removing studies at high risk)</b> |                                | <b>Post-hoc (removing studies at unclear and high risk)</b> |                                |
|--------------------------------------------------------|----------------------------------------------------|--------------------------------|-------------------------------------------------------------|--------------------------------|
|                                                        | <b>Trend estimate (kg/month)</b>                   | <b>95% confidence interval</b> | <b>Trend estimate (kg/month)</b>                            | <b>95% confidence interval</b> |
| Weight loss at programme end (kg)                      | 0.026                                              | 0.018 to 0.034                 | 0.05                                                        | 0.03 to 0.06                   |
| Rate of weight loss during the programme (kg per year) | -0.047                                             | -0.073 to -0.021               | -0.07                                                       | -0.15 to 0.01                  |

**Table 8. Results from sensitivity analysis; model b**

| Characteristic           | Pre-planned (removing studies at high risk) |                         | Post-hoc (removing studies at unclear and high risk) |                         |
|--------------------------|---------------------------------------------|-------------------------|------------------------------------------------------|-------------------------|
|                          | Trend estimate (kg/month)                   | 95% confidence interval | Trend estimate (kg/month)                            | 95% confidence interval |
| Partial meal replacement | 0.134                                       | 0.071 to 0.196          | 0.093                                                | -0.03 to 0.22           |
| Total meal replacement   | 0.074                                       | 0.022 to 0.126          | 0.061                                                | 0.009 to 0.112          |
| Setting (inpatient)      | 0.144                                       | -0.025 to 0.313         | 0.022                                                | -0.033 to 0.077         |
| Financial incentives     | 0.087                                       | 0.004 to 0.169          | 0.095                                                | -0.137 to 0.329         |
| Outside (yes)            | -0.305                                      | -0.433 to -0.177        | 0.022                                                | -0.191 to 0.236         |

**Table 9. Results from sensitivity analysis; model c**

| Characteristic                                         | Pre-planned (removing studies at high risk) |                         | Post-hoc (removing studies at unclear and high risk) |                         |
|--------------------------------------------------------|---------------------------------------------|-------------------------|------------------------------------------------------|-------------------------|
|                                                        | Trend estimate (kg/month)                   | 95% confidence interval | Trend estimate (kg/month)                            | 95% confidence interval |
| Weight loss at programme end (kg)                      | 0.023                                       | 0.015 to 0.031          | 0.02                                                 | 0.01 to 0.02            |
| Rate of weight loss during the programme (kg per year) | -0.043                                      | -0.070 to -0.015        | -0.01                                                | -0.03 to 0.01           |
| Partial meal replacement                               | 0.11                                        | 0.049 to 0.161          | -0.02                                                | -0.05 to 0.00           |
| Total meal replacement                                 | 0.025                                       | -0.032 to 0.083         | -0.02                                                | -0.04 to 0.01           |
| Intervention faded in intensity                        | -0.020                                      | -0.045 to 0.006         | -0.03                                                | -0.05 to 0.00           |
| Financial incentives                                   | 0.040                                       | -0.033 to 0.112         | 0.09                                                 | 0.02 to 0.16            |
| Outside (yes)                                          | -0.30                                       | -0.42 to -0.18          | -0.24                                                | -0.35 to -0.14          |

SUPPLEMENTAL FIGURES

Supplemental Figure 1. PRISMA diagram of study flow

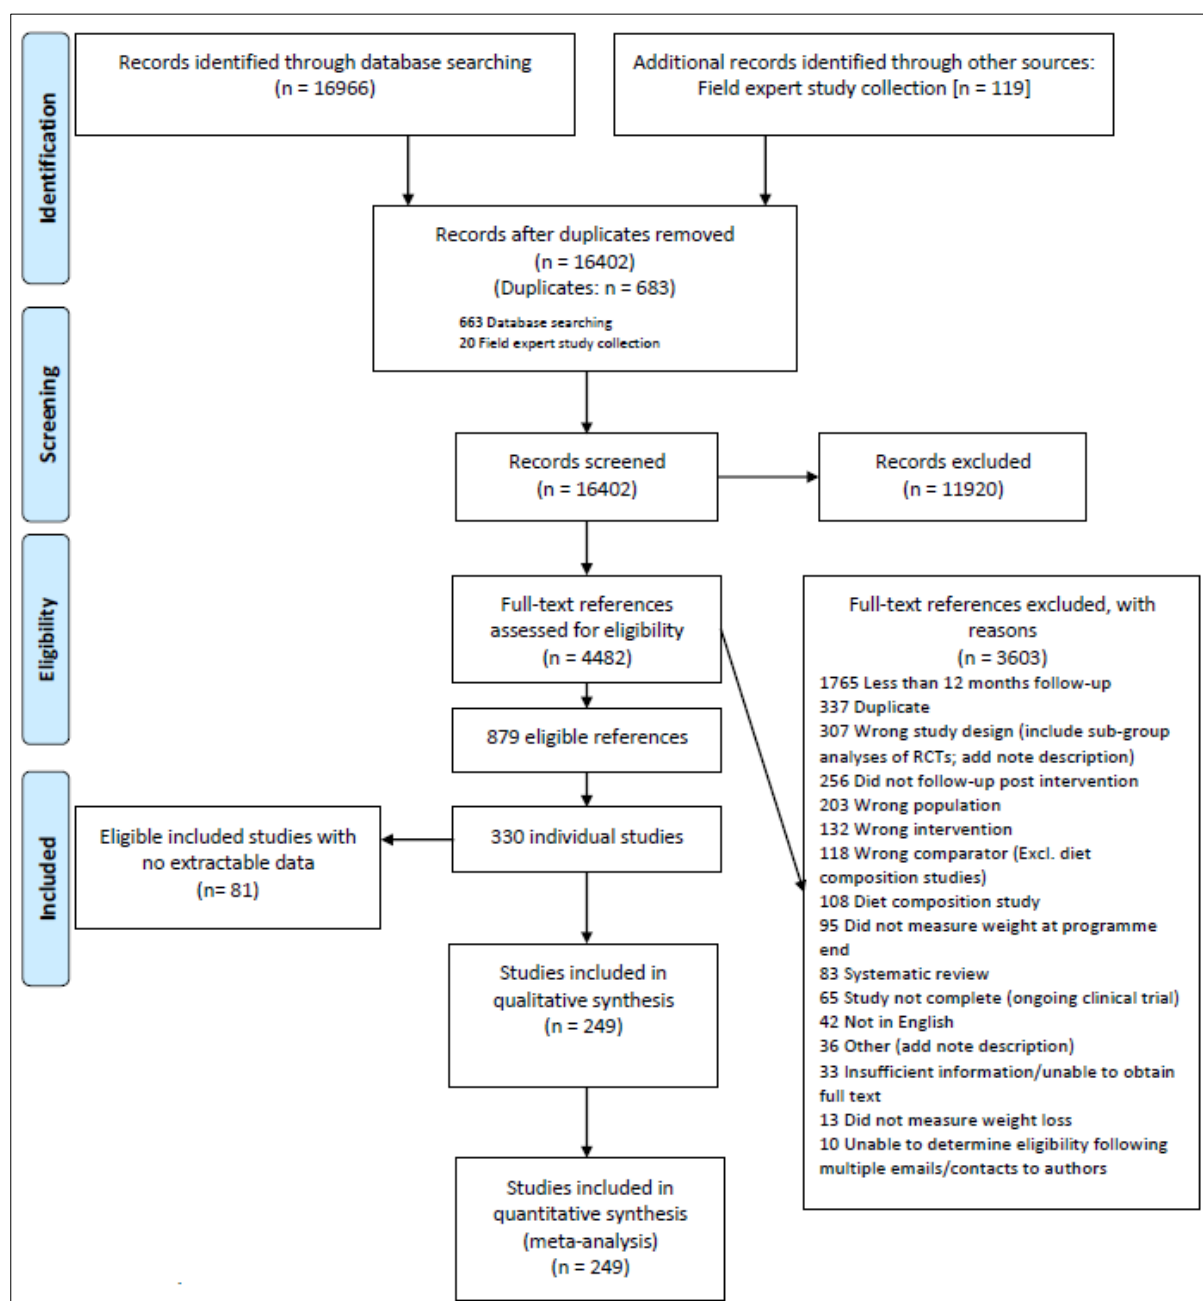



**Supplemental Figure 2. Weight change trajectory after programme end in studies where programme was available outside the study, with most influential study removed (Perri 1984)**

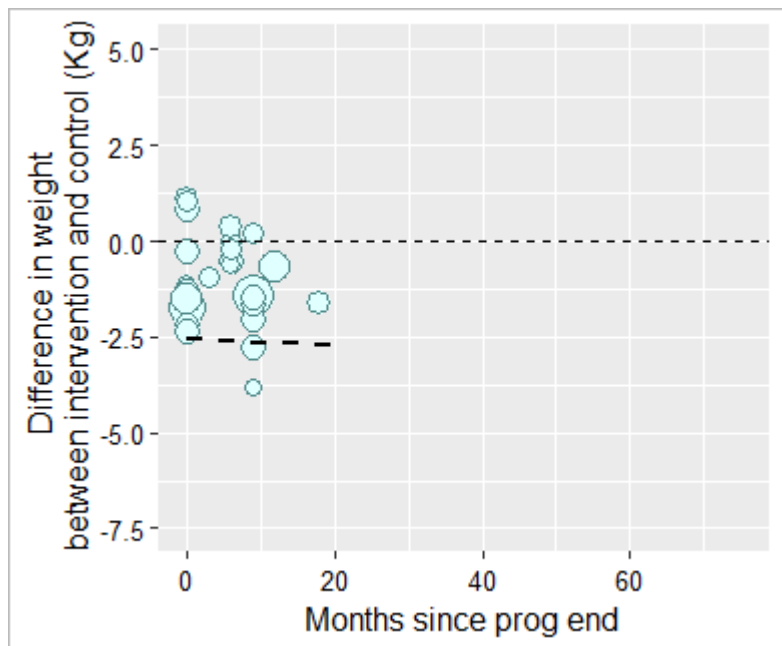
